# Supplementary material for: SRSF10 is essential for progenitor spermatogonia expansion by regulating alternative splicing
Source: eLife journal article supplement (doi:10.7554/elife.78211), 2022-10-24
Supplement: fig1-data1 [file Figure 1-source data 1.xlsx]

## Sheet: Figure 1D
Figure 1D-source data: The testis weight of 2-month-old male mice.
Genotype		Body weight	Testis weight-1	Testis weight-2	Testis weight / body weight-1	Testis weight / body weight-2
Srsf10F/+	6673	26.3	0.095	0.0951	0.00361217	0.00361597
	6635	28.2	0.0978	0.0965	0.00346809	0.00342199
	6079	22.6	0.0801	0.078	0.00354425	0.00345133
	6640	27.7	0.0809	0.0889	0.00292058	0.00320939
Srsf10F/+;Vasa-Cre	6677	24.7	0.0854	0.0898	0.00345749	0.00363563
	6633	27.5	0.0862	0.087	0.00313455	0.00316364
	6631	24.7	0.0991	0.0941	0.00401215	0.00380972
	5190	26.5	0.0841	0.0833	0.00317358	0.0031434
Srsf10F/-;Vasa-Cre	5191	25.8	0.0172	0.018	0.000666667	0.000697674
	5557	30.8	0.0202	0.0197	0.000655844	0.00063961
	5188	27.3	0.0186	0.0167	0.000681319	0.000611722
	6675	22.7	0.0173	0.0189	0.000762115	0.000832599
		Testis weight
		1	2	3
		Srsf10F/+	Srsf10F/+;Vasa-Cre	Srsf10F/-;Vasa-Cre
		0.095	0.0854	0.0172
		0.0978	0.0862	0.0202
		0.0801	0.0991	0.0186
		0.0809	0.0841	0.0173
		0.0951	0.0898	0.018
		0.0965	0.087	0.0197
		0.078	0.0941	0.0167
		0.0889	0.0833	0.0189
	mean	0.0890375	0.088625	0.018325
	T-test	1 vs 2	0.907805
		1 vs 3	3.07782e-08
		2 vs 3	7.72088e-10

## Sheet: Figure 1E
Figure 1E-source data
Genotype		Body weight	Testis weight-1	Testis weight-2	Testis weight / body weight-1	Testis weight / body weight-2
Srsf10F/+	6673	26.3	0.095	0.0951	0.00361217	0.00361597
	6635	28.2	0.0978	0.0965	0.00346809	0.00342199
	6079	22.6	0.0801	0.078	0.00354425	0.00345133
	6640	27.7	0.0809	0.0889	0.00292058	0.00320939
Srsf10F/+;Vasa-Cre	6677	24.7	0.0854	0.0898	0.00345749	0.00363563
	6633	27.5	0.0862	0.087	0.00313455	0.00316364
	6631	24.7	0.0991	0.0941	0.00401215	0.00380972
	5190	26.5	0.0841	0.0833	0.00317358	0.0031434
Srsf10F/-;Vasa-Cre	5191	25.8	0.0172	0.018	0.000666667	0.000697674
	5557	30.8	0.0202	0.0197	0.000655844	0.00063961
	5188	27.3	0.0186	0.0167	0.000681319	0.000611722
	6675	22.7	0.0173	0.0189	0.000762115	0.000832599
		The ratio of testes to body weight
		1	2	3
		Srsf10F/+	Srsf10F/+;Vasa-Cre	Srsf10F/-;Vasa-Cre
		0.00361217	0.00345749	0.000666667
		0.00346809	0.00313455	0.000655844
		0.00354425	0.00401215	0.000681319
		0.00292058	0.00317358	0.000762115
		0.00361597	0.00363563	0.000697674
		0.00342199	0.00316364	0.00063961
		0.00345133	0.00380972	0.000611722
		0.00320939	0.0031434	0.000832599
	mean	0.00340547	0.00344127	0.000693444
	T-test	1 vs 2	0.812143
		1 vs 3	6.76898e-10
		2 vs 3	3.5789e-08

## Sheet: Figure 1H
Figure 1H-source data: The PLZF+ cell number per tubule cross-section in 2-month-old testes.
						The detailed information of Figure 1H
	PLZF+ cells/tubule cross-section					PLZF+ cells/tubule cross section
	Control	Srsf10-cKO					Control-1	Control-2	Control-3	Srsf10cKO-1	Srsf10cKO-2	Srsf10cKO-3	Srsf10cKO-4	Srsf10cKO-5			The tubule cross-sections of Control	The tubule cross-sections of srsf10-cKO
	4.66102	1.29032				tubule-1	2	6	7	1	8	0	2	2			50	93
	5.1	0.77381				tubule-2	2	6	2	0	0	0	4	2			65	84
	5.56923	1.84211				tubule-3	1	9	0	0	0	0	5	0			59	114
		2.14458				tubule-4	6	5	5	0	0	3	0	0				83
		2.21212				tubule-5	4	2	6	3	0	2	2	3				33
mean	5.11	1.653				tubule-6	9	6	5	0	0	4	5	3
						tubule-7	6	5	6	2	0	1	1	3			174	407
T-test	0.000162392					tubule-8	3	1	2	5	0	1	1	1
						tubule-9	0	1	5	0	1	3	0	4
						tubule-10	2	2	4	3	0	2	2	4
						tubule-11	0	2	4	0	0	2	1	1
						tubule-12	5	4	8	0	0	1	2	4
						tubule-13	5	4	7	0	0	1	4	3
						tubule-14	8	9	4	0	0	4	1	0
						tubule-15	9	4	6	4	0	1	2	7
						tubule-16	7	4	10	1	0	4	3	3
						tubule-17	0	4	8	3	0	4	2	3
						tubule-18	3	7	7	2	0	0	2	2
						tubule-19	4	4	10	1	5	3	2	0
						tubule-20	2	7	8	8	2	3	1	3
						tubule-21	2	14	2	0	0	1	2	0
						tubule-22	0	5	4	0	0	2	1	3
						tubule-23	10	4	9	3	0	1	4	1
						tubule-24	6	8	7	6	0	2	3	2
						tubule-25	12	1	7	0	0	1	0	2
						tubule-26	6	8	8	0	8	1	0	2
						tubule-27	10	5	10	3	0	1	3	0
						tubule-28	10	1	9	1	0	0	3	3
						tubule-29	14	1	14	1	0	6	5	3
						tubule-30	7	5	2	3	0	2	4	3
						tubule-31	6	2	0	1	0	3	2	0
						tubule-32	2	14	2	5	1	3	4	0
						tubule-33	4	0	8	2	3	1	2	6
						tubule-34	12	13	5	0	0	2	0
						tubule-35	2	8	5	0	0	1	2
						tubule-36	7	7	2	0	0	1	2
						tubule-37	4	8	8	0	0	1	2
						tubule-38	0	3	5	1	0	0	0
						tubule-39	3	3	5	5	0	1	3
						tubule-40	5	2	2	4	0	0	4
						tubule-41	1	2	8	3	0	5	0
						tubule-42	2	4	5	0	0	1	2
						tubule-43	2	3	6	7	0	2	4
						tubule-44	4	5	3	1	0	1	0
						tubule-45	5	2	7	1	0	1	0
						tubule-46	9	1	9	1	0	0	2
						tubule-47	5	9	4	0	0	0	2
						tubule-48	5	6	0	0	0	5	5
						tubule-49	3	9	4	0	0	0	3
						tubule-50	6	10	2	0	3	2	1
						tubule-51	2		6	1	3	3	3
						tubule-52	1		12	4	7	1	3
						tubule-53	9		8	2	0	1	0
						tubule-54	3		7	2	0	2	7
						tubule-55	3		3	1	0	0	1
						tubule-56	2		3	0	0	0	5
						tubule-57	2		10	0	0	1	2
						tubule-58	6		7	0	1	2	1
						tubule-59	5		4	0	0	1	5
						tubule-60			3	6	2	1	3
						tubule-61			3	0	2	2	0
						tubule-62			4	4	4	4	3
						tubule-63			4	1	0	6	3
						tubule-64			10	0	0	0	1
						tubule-65			2	0	0	3	2
						tubule-66				2	0	1	1
						tubule-67				0	2	2	2
						tubule-68				2	0	1	2
						tubule-69				0	0	1	4
						tubule-70				1	0	1	0
						tubule-71				0	0	0	0
						tubule-72				1	0	3	4
						tubule-73				2	2	0	4
						tubule-74				2	2	1	2
						tubule-75				0	7	5	2
						tubule-76				0	0	1	0
						tubule-77				2	1	1	4
						tubule-78				0	0	1	0
						tubule-79				0	0	3	0
						tubule-80				0	0	2	2
						tubule-81				0	0	4	2
						tubule-82				0	0	3	1
						tubule-83				0	0	5	2
						tubule-84				0	1	4
						tubule-85				1		2
						tubule-86				1		0
						tubule-87				0		0
						tubule-88				0		1
						tubule-89				0		1
						tubule-90				0		3
						tubule-91				2		1
						tubule-92				2		3
						tubule-93				0		4
						tubule-94						4
						tubule-95						4
						tubule-96						1
						tubule-97						0
						tubule-98						1
						tubule-99						2
						tubule-100						1
						tubule-101						2
						tubule-102						1
						tubule-103						5
						tubule-104						1
						tubule-105						1
						tubule-106						1
						tubule-107						1
						tubule-108						1
						tubule-109						4
						tubule-110						1
						tubule-111						1
						tubule-112						6
						tubule-113						3
						tubule-114						2
						tubule-115
						mean	4.66102	5.1	5.56923	1.29032	0.77381	1.84211	2.14458	2.21212
