# Supplementary material for: SRSF10 is essential for progenitor spermatogonia expansion by regulating alternative splicing
Source: eLife journal article supplement (doi:10.7554/elife.78211), 2022-10-24
Supplement: fig1-figsupp2-data1 [file Figure 1- figure supplement 2-source data 1.xlsx]

## Sheet: Figure1 S2B
Figure 1- figure supplement 2-source data 1: The testis weight of one-month-old male mice.
	1M Testis weight
	Control	Srsf10-cKO
	0.0595	0.0148
	0.0608	0.0156
	0.0393	0.0119
	0.0491	0.0129
	0.0684	0.0194
	0.0667	0.0191
mean	0.0573	0.0156167
T-test	0.000144528
