# Supplementary material for: SRSF10 is essential for progenitor spermatogonia expansion by regulating alternative splicing
Source: eLife journal article supplement (doi:10.7554/elife.78211), 2022-10-24
Supplement: fig2-data1 [file Figure 2-source data 1.xlsx]

## Sheet: Figure 2C
Figure 2C-source data: The ratio of SYCP3+ tubule cross-sections in P12 testes.
							The detailed information of Figure 2C
													All mounted cross-sections
	SYCP3+ cross-sections/ mounted cross-sections								SYCP3+ cross-sections	All mounted cross-sections	SYCP3+ cross-sections/ mounted cross-sections		Control	Srsf10-cKO
	Control	Srsf10-cKO						Control1-1	50	60	0.833333		60	34
	0.800993	0.2852						Control1-2	50	64	0.78125		64	43
	0.895255	0.076105						Control1-3	37	43	0.860465		43	20
	0.747222	0.195591						Control1-4	39	54	0.722222		54	38
		0.099697						Control1-5	42	52	0.807692		52	26
mean	0.8145	0.1641						mean			0.800993		32	49
													43	49
T-test	0.000174636							Control2-1	29	32	0.90625		30	42
								Control2-2	39	43	0.906977		26	48
								Control2-3	26	30	0.866667		34	48
								Control2-4	23	26	0.884615		135	183
								Control2-5	31	34	0.911765		133	191
								mean			0.895255		139	194
														177
								Control3-1	107	135	0.792593			179
								Control3-2	98	133	0.736842			186
								Control3-3	99	139	0.71223
								mean			0.747222		845	1507
								Srsf10cKO1-1	7	34	0.205882
								Srsf10cKO1-2	14	43	0.325581
								Srsf10cKO1-3	7	20	0.35
								Srsf10cKO1-4	9	38	0.236842
								Srsf10cKO1-5	8	26	0.307692
								mean			0.2852
								Srsf10cKO2-1	4	49	0.0816327
								Srsf10cKO2-2	4	49	0.0816327
								Srsf10cKO2-3	3	42	0.0714286
								Srsf10cKO2-4	3	48	0.0625
								Srsf10cKO2-5	4	48	0.0833333
								mean			0.0761054
								Srsf10cKO3-1	38	183	0.20765
								Srsf10cKO3-2	35	191	0.183246
								Srsf10cKO3-3	38	194	0.195876
								mean			0.195591
								Srsf10cKO4-1	19	177	0.107345
								Srsf10cKO4-2	17	179	0.0949721
								Srsf10cKO4-3	18	186	0.0967742
								mean			0.099697
