# Supplementary material for: SRSF10 is essential for progenitor spermatogonia expansion by regulating alternative splicing
Source: eLife journal article supplement (doi:10.7554/elife.78211), 2022-10-24
Supplement: fig3-data2 [file Figure 3-source data 1.xlsx]

## Sheet: Figure 3C
Figure 3C-source data:The number of PLZF+MVH+ cells and MVH+PLZF- cells per tubule cross-sectionin P8 testes.
									The detailed information of Figure 3C
									PLZF+ cells/tubule																							PLZF+ cells/tubule
										Control 1-1	Control 1-2	Control 1-3	Control 2-1	Control 2-2	Control 2-3	Control 3-1	Control 3-2	Control 3-3	Control 4-1	Control 4-2	Control 4-3	Control 5-1	Control 5-2	Control 5-3	Control 6-1	Control 6-2	Control 6-3	Control 6-4	Control 6-5			Srsf10cKO1-1	Srsf10cKO1-2	Srsf10cKO1-3	Srsf10cKO2-1	Srsf10cKO2-2	Srsf10cKO2-3	Srsf10cKO3-1	Srsf10cKO3-2	Srsf10cKO3-3	Srsf10cKO4-1	Srsf10cKO4-2	Srsf10cKO4-3	Srsf10cKO5-1	Srsf10cKO5-2	Srsf10cKO5-3	Srsf10cKO6-1	Srsf10cKO6-2	Srsf10cKO6-3
	MVH+ cells/tubule	mean		PLZF+ cells/tubule	mean	MVH+PLZF- cells	mean		tubule1	10	7	19	9	11	7	5	8	13	4	5	6	10	12	13	8	5	13	6	12		tubule1	4	7	4	4	6	6	4	2	3	3	22	16	5	3	8	6	7	1
Control 1-1	10.3611		Control 1-1	7.84615		2.51496			tubule2	10	12	5	13	5	8	3	7	6	6	6	6	14	9	8	8	11	8	12	12		tubule2	3	5	2	8	2	6	4	3	7	4	2	13	9	1	8	4	0	0
Control 1-2	10.5833		Control 1-2	7.51852		3.06481			tubule3	9	7	5	9	3	11	7	8	7	6	5	6	21	8	17	6	5	11	16	17		tubule3	4	4	3	1	4	5	3	1	5	6	5	10	9	8	6	2	3	7
Control 1-3	12.2982	11.0809	Control 1-3	8.26923	7.87797	4.02901	3.20293		tubule4	9	9	6	13	4	11	6	5	11	6	11	9	30	10	11	3	15	5	8	6		tubule4	6	2	5	6	3	3	4	3	10	8	2	3	5	10	6	5	3	5
Control 2-1	13.7797		Control 2-1	9.05455		4.72512			tubule5	9	10	11	13	7	11	23	1	8	13	12	11	11	10	10	13	14	9	8	14		tubule5	9	2	6	4	5	0	9	2	9	5	4	1	8	7	11	7	1	1
Control 2-2	12.5122		Control 2-2	8.29268		4.21951			tubule6	5	9	3	7	4	8	4	3	9	9	5	14	17	13	6	10	19	6	7	9		tubule6	3	14	5	7	9	6	2	5	5	6	5	4	8	3	4	2	5	3
Control 2-3	11.5	12.5973	Control 2-3	7.56863	8.30529	3.93137	4.292		tubule7	5	8	3	9	10	5	4	3	5	9	11	7	5	7	5	4	7	9	9	11		tubule7	6	0	4	6	5	8	5	0	19	3	6	6	7	7	8	5	0	3
Control 3-1	9.5		Control 3-1	7.5		2			tubule8	7	11	7	9	2	4	6	5	10	6	11	7	6	5	3	10	9	9	11	12		tubule8	3	7	3	6	6	7	6	2	4	6	5	7	12	11	8	6	4	1
Control 3-2	9.54386		Control 3-2	7.24194		2.30192			tubule9	7	4	8	11	5	4	12	11	4	3	9	6	12	5	9	9	8	9	6	7		tubule9	8	4	1	4	3	5	9	1	3	3	3	5	7	11	6	1	5	1
Control 3-3	10.4211	9.82164	Control 3-3	8.25806	7.66667	2.16299	2.15497		tubule10	9	8	9	13	9	9	6	21	4	3	8	7	9	4	5	8	8	7	8	7		tubule10	5	2	3	5	3	4	4	8	6	1	3	0	5	5	12	0	4	5
Control 4-1	11.0368		Control 4-1	9.27551		1.76133			tubule11	9	6	11	9	7	9	7	7	8	9	13	7	5	2	7	6	8	7	7	4		tubule11	3	3	2	1	5	5	4	1	6	5	4	3	5	9	8	0	0	8
Control 4-2	10.4029		Control 4-2	9.84729		0.555622			tubule12	11	8	6	7	8	9	10	5	10	10	10	11	8	8	37	6	10	10	8			tubule12	6	3	4	4	3	5	6	3	7	6	3	7	4	12	2	0	2	4
Control 4-3	10.5229	10.6542	Control 4-3	9.73684	9.61988	0.786094	1.03435		tubule13	4	9	11	5	7	10	6	4	8	11	10	9	12	13	18	9	7	13				tubule13	4	3	14	7	3	5	5	8	4	6	3	5	8	1	8	8	0	0
Control 5-1	14.1628		Control 5-1	9.16		5.00279			tubule14	5	8	7	11	9	5	6	12	8	6	10	16	8	8	8	12	8	15				tubule14	5	3	4	3	2	5	3	5	1	8	3	7	4	3	9	0	0	4
Control 5-2	16.4706		Control 5-2	8.83019		7.6404			tubule15	6	5	9	6	6	5	11	20	5	7	11	5	8	7	9	4	13	12				tubule15	6	8	14	3	6	7	0	7	3	6	2	6	6	9	6	0	0	4
Control 5-3	17.5172	16.0502	Control 5-3	9.2	9.0634	8.31724	6.98681		tubule16	9	8	8	7	12	6	7	6	9	11	11	7	16	13	7	15		12				tubule16	8	4	9	4	4	6	5	3	5	7	6	2	4	7	13	4	1	4
Control 6-1	22.6667		Control 6-1	8		14.6667			tubule17	9	5	8	12	9	4	11	8	11	9	16	15	3	6	7	11		8				tubule17	9	4	3	5	4	8	4	6	5	1	5	1		9	6	10	4	3
Control 6-2	23.2		Control 6-2	9.8		13.4			tubule18	8	7	8	6	6	7	6	20	12	6	9	13	10	5	9	3		8				tubule18	5	7	4	1	8	3	6	8	6	3	4	4		6		7	0	2
Control 6-3	18.4762		Control 6-3	9.2381		9.2381			tubule19	15	6	13	12	13	9	8	8	10	12	5	9	7	6	7	7		8				tubule19	3	3	2	9	3	6	3	4	1	3	4	2		13		0	0	4
Control 6-4	21.1667		Control 6-4	8.83333		12.3333			tubule20	5	9	13	8	8	6	11	8	10	10	11	14	17	11	10			9				tubule20	3	3	4	6	4	3	5	2	11	2	1	5		8		5	0	4
Control 6-5	19.25	20.9519	Control 6-5	10.0909	9.19247	9.15909	10.2435		tubule21	8	5	12	15	14	6	6	10	9	8	6	11	9	16	4			6				tubule21	2	4	6	2	5	0	5	2	4	9	2	3		9		6	7	0
									tubule22	6	6	5	12	10	8	9	13	9	15	6	5	11	11	9							tubule22	6	8	7	1	2	4	6	6	5	7	3	4		9		5	3	0
									tubule23	7	5	6	11	9	11	9	3	9	13	8	9	9	9	7							tubule23	7	5	2	3	4	4	3	5	4	5	6	2		6		9	5	6
	MVH+ cells/tubule	mean		PLZF+ cells/tubule	mean	MVH+PLZF- cells	mean		tubule24	8	10	5	7	5	5	5	2	13	6	8	7	9	9	8							tubule24	5	6	4	2	4	1	3	9	0	4	3	3		12		6	3	10
Srsf10cKO1-1	5.71429		Srsf10cKO1-1	4.77273		0.941558			tubule25	6	7	6	9	8	6	10	27	6	9	4	3	8	9	3							tubule25	5	15	6	1	1	4	2	5	3	5	5	5				7		1
Srsf10cKO1-2	5.5102		Srsf10cKO1-2	4.69388		0.816327			tubule26	8	5	8	13	12	13	10	4	8	13	14	8	7	5	6							tubule26	3	0	3	3	7	7	8	8	3	2	6	1					2	0
Srsf10cKO1-3	5.625	5.6165	Srsf10cKO1-3	4.91837	4.79499	0.706633	0.821506		tubule27	10	3	10	6	10	7	12	5	4	12	4	3	8	8	10							tubule27	4	3	3	0	4	1	4	9	6	5	7	1					2
Srsf10cKO2-1	3.73034		Srsf10cKO2-1	3.42353		0.306808			tubule28	6	10	14	7	5	7	3	6	6	12	4	6	10	5	7							tubule28	3	3	3	2	4	5	3	4	0	7	5	4
Srsf10cKO2-2	4.88095		Srsf10cKO2-2	4.0119		0.869048			tubule29	4	3	12	6	12	6	4	7	8	9	7	15	10	12	3							tubule29	4	3	3	6	4	4	3	1	0	3	5	5
Srsf10cKO2-3	5.38462	4.6653	Srsf10cKO2-3	4.06557	3.83367	1.31904	0.831632		tubule30	6	14	9	7	10	3	5	3	4	7	8	14	12	10	13							tubule30	4	6	6	3	5	4	4	0	8	2	4	2
Srsf10cKO3-1	6.14286		Srsf10cKO3-1	5.14		1.00286			tubule31	7	4	10	3	17	11	7	4	12	11	12	10	0	8								tubule31	5	4	3	4	7	3	9	2	2	5	3	8
Srsf10cKO3-2	5.40476		Srsf10cKO3-2	4.11905		1.28571			tubule32	8	12	3	11	9	8	7	6		8	15	8	4	9								tubule32	2	6	2	4	4	4	4	9	1	7	4	6
Srsf10cKO3-3	5.96	5.83587	Srsf10cKO3-3	4.92308	4.72737	1.03692	1.1085		tubule33	9	5	2	11	5	13	9	7		7	9	15	8	5								tubule33	5	10	6	3	4	6	7	0	5	4	4	4
Srsf10cKO4-1	4.91286		Srsf10cKO4-1	4.45755		0.455316			tubule34	7	6	6	9	11	13	5	5		14	12	7	8	7								tubule34	3	11	8	4	4	6	4	5	5	8	6	4
Srsf10cKO4-2	4.25738		Srsf10cKO4-2	3.86321		0.394176			tubule35	8	10	9	7	7	3	9	7		15	10	22	9	5								tubule35	5	3	3	4	6	4	5	4	6	3	2	1
Srsf10cKO4-3	4.37344	4.51456	Srsf10cKO4-3	3.89623	4.07233	0.477218	0.442237		tubule36	10	9	5	8	10	5	6	9		13	8	12	11	11								tubule36	6	3	2	2	6	3	6	1	3	5	6	3
Srsf10cKO5-1	9.64706		Srsf10cKO5-1	6.625		3.02206			tubule37	6	9	6	10	11	9	7	10		9	17	10	3	3								tubule37	4	2	8	1	6	8	5	4	0	2	0	6
Srsf10cKO5-2	9.91667		Srsf10cKO5-2	7.45833		2.45833			tubule38	7	6	10	8	10	8	8	6		6	9	18	6	7								tubule38	4	4	1	3	7	7	5	5	3	11	4	4
Srsf10cKO5-3	9.52941	9.69771	Srsf10cKO5-3	7.58824	7.22386	1.94118	2.47386		tubule39	8	10	6	7	9	10	7	4		8	19	12	9	5								tubule39	6	6	3	3	3	4	11	9	2	1	3	5
Srsf10cKO6-1	4.78261		Srsf10cKO6-1	4.2		0.582609			tubule40	10	9	7	9	5	5	6	3		12	30	31	9	5								tubule40	2	0	7	5	7	4	4	4	6	2	10	4
Srsf10cKO6-2	2.75		Srsf10cKO6-2	2.34615		0.403846			tubule41	16	5	7	5	6	7	5	8		21	10	11	9	11								tubule41	9	3	1	8	9	1	6	6	6	2	13	4
Srsf10cKO6-3	3.22222		Srsf10cKO6-3	3.11538		0.106838			tubule42	18	8	9	10		7	10	4		9	8	11	9	17								tubule42	3	5	4	2	5	0	9	1	2	2	4	1
Srsf10cKO6-4	2.73913		Srsf10cKO6-4	2.32		0.41913			tubule43	13	6	9	11		9	4	6		11	14	11	8	11								tubule43	5	2	3	3	5	3	9		8	6	5	4
Srsf10cKO6-5	5.04545		Srsf10cKO6-5	3.17391		1.87154			tubule44	3	8	3	7		7	8	8		16	40	27	6	30								tubule44	5	2	14	2	5	0	11		3	6	5	4
Srsf10cKO6-6	4.21053	3.79166	Srsf10cKO6-6	3.4	3.09258	0.810526	0.699082		tubule45	7	8	9	7		8	9	8		3	5	13	3	12								tubule45		13	5	2	3	0	4		4	4	3	3
									tubule46	15	7	9	7		2	7	4		20	7	13	12	9								tubule46		4	5	2	3	6	1		3	2	3	1
									tubule47	11	6	7	7		10	7	6		9	11	12	3	9								tubule47		5	13	2	2	8	2		3	2	4	4
									tubule48	6	5	11	7		9	7	6		10	11	17	6	5								tubule48		5	6	2	1	3	5		8	4	5	1
	MVH+PLZF+ cells/tubule			MVH+PLZF- cells/tubule					tubule49	10	6	6	17		4		6		12	7	13	5	6								tubule49		1	8	2	4	4	6		4	4	1	2
	Control	Srsf10-cKO		Control	Srsf10-cKO				tubule50	6	7	15	11		13		6		5	9	27	8	5								tubule50				5	5	6	12		9	3	3	7
	7.87797	4.79499		3.20293	0.821506				tubule51	4	8	10	8		5		5		12	8	20		9								tubule51				1	0	2			9	5	1	6
	8.30529	3.83367		4.292	0.831632				tubule52	10	9	14	12				9		12	9	19		7								tubule52				1	4	5			11	5	2	1
	7.66667	4.72737		2.15497	1.1085				tubule53	2	11		4				4		7	10	12		16								tubule53				4	2	5				8	3	3
	9.61988	4.07233		1.03435	0.442237				tubule54	6	8		9				7		8	30	6										tubule54				2	5	1				6	2	1
	9.0634	6.62623		6.98681	2.47386				tubule55	5	4		11				8		10	23	8										tubule55				2	4	2				5	4	1
	9.19247	3.09258		10.2435	0.699082				tubule56	6	7						12		8	17	9										tubule56				5	1	2				7	4	3
mean	8.62094	4.52453	mean	4.65243	1.0628				tubule57	8	11						3		6	13	5										tubule57				4	1	2				6	8	5
T-test	3.82734e-05		T-test	0.0492696					tubule58	4	6						8		11	11	9										tubule58				5	2	1				3	6	1
									tubule59	8	6						2		11	13	11										tubule59				5	1	4				10	7	5
									tubule60	8	7						6		17	26	14										tubule60				2	5	6				2	5	3
	All mounted tubules								tubule61	5	6						6		22	17	12										tubule61				5	8	1				4	7	1
	Control	Srsf10-cKO							tubule62	5	1						6		12	3	11										tubule62				3	4					8	1	1
	65	44							tubule63	6	6								21	9	12										tubule63				3	4					5	4	1
	81	49							tubule64	12	10								17	5	4										tubule64				2	1					7	3	5
	52	49							tubule65	6	5								6	8	9										tubule65				6	6					8	4	2
	55	85							tubule66		11								15	7	9										tubule66				1	4					6	3	0
	41	84							tubule67		11								10	11	18										tubule67				1	8					4	7	1
	51	61							tubule68		10								4	9	14										tubule68				4	4					6	1	5
	48	50							tubule69		6								10	4	9										tubule69				1	5					8	4	8
	62	42							tubule70		7								5	13	9										tubule70				1	2					7	1	3
	31	52							tubule71		10								8	5	10										tubule71				3	2					5	2	4
	196	212							tubule72		6								10	5	17										tubule72				3	2					3	4	3
	203	212							tubule73		8								10	10	2										tubule73				4	4					6	5	3
	190	212							tubule74		3								4	8	2										tubule74				5	1					2	2	8
	50	16							tubule75		14								13	7	7										tubule75				5	3					6	2	3
	53	24							tubule76		8								11	3	9										tubule76				4	6					6	3	1
	30	17							tubule77		7								9	11	7										tubule77				0	3					5	3	4
	19	25							tubule78		8								16	11	15										tubule78				0	6					2	2	3
	15	26							tubule79		8								3	4	18										tubule79				4	4					7	0	3
	21	26							tubule80		8								2	8	13										tubule80				7	4					10	4	4
	12	25							tubule81		9								12	11	10										tubule81				3	2					6	5	5
	11	23							tubule82										3	7	9										tubule82				3	1					5	7	6
		20							tubule83										6	5	14										tubule83				7	3					5	6	5
									tubule84										13	5	6										tubule84				3	1					7	4	5
	1286	1354							tubule85										7	6	9										tubule85				2						7	6	4
									tubule86										22	3	9										tubule86										2	3	2
									tubule87										27	7	11										tubule87										3	4	0
									tubule88										14	3	33										tubule88										4	10	3
									tubule89										10	12	11										tubule89										6	1	1
									tubule90										5	11	7										tubule90										7	2	4
									tubule91										14	18	4										tubule91										3	4	2
									tubule92										4	7	7										tubule92										2	4	2
									tubule93										10	25	8										tubule93										3	2	2
									tubule94										7	8	9										tubule94										1	1	4
									tubule95										10	9	6										tubule95										5	1	3
									tubule96										21	9	6										tubule96										6	5	0
									tubule97										11	13	6										tubule97										5	1	3
									tubule98										10	8	8										tubule98										7	1	3
									tubule99										11	25	4										tubule99										6	5	2
									tubule100										11	12	7										tubule100										5	1	7
									tubule101										11	16	7										tubule101										8	4	1
									tubule102										8	21	6										tubule102										5	2	1
									tubule103										5	9	7										tubule103										5	2	5
									tubule104										18	7	8										tubule104										5	2	4
									tubule105										16	8	12										tubule105										6	8	4
									tubule106										11	10	10										tubule106										5	1	3
									tubule107										7	14	8										tubule107										4	1	4
									tubule108										8	7	8										tubule108										5	7	4
									tubule109										9	8	7										tubule109										3	5	3
									tubule110										5	17	8										tubule110										4	2	1
									tubule111										6	10	5										tubule111										2	7	4
									tubule112										5	15	15										tubule112										6	4	2
									tubule113										6	9	7										tubule113										2	1	3
									tubule114										5	8	9										tubule114										9	3	2
									tubule115										2	7	3										tubule115										4	3	4
									tubule116										9	8	6										tubule116										6	5	0
									tubule117										10	4	6										tubule117										1	2	5
									tubule118										10	10	6										tubule118										1	4	2
									tubule119										11	7	7										tubule119										3	5	3
									tubule120										8	5	9										tubule120										3	5	3
									tubule121										5	9	4										tubule121										1	0	2
									tubule122										6	11	8										tubule122										3	4	2
									tubule123										6	8	5										tubule123										1	2	0
									tubule124										14	7	4										tubule124										0	5	5
									tubule125										8	9	6										tubule125										3	3	8
									tubule126										7	6	8										tubule126										2	5	7
									tubule127										6	6	4										tubule127										0	4	5
									tubule128										7	10	3										tubule128										1	5	5
									tubule129										6	20	4										tubule129										1	0	2
									tubule130										9	7	3										tubule130										5	2	6
									tubule131										7	13	6										tubule131										2	4	10
									tubule132										16	12	9										tubule132										4	2	14
									tubule133										6	15	3										tubule133										3	1	8
									tubule134										15	10	5										tubule134										3	3	2
									tubule135										19	9	15										tubule135										4	1	5
									tubule136										9	18	4										tubule136										0	2	7
									tubule137										14	16	11										tubule137										1	4	6
									tubule138										6	12	7										tubule138										1	1	6
									tubule139										14	8	8										tubule139										6	2	3
									tubule140										12	7	8										tubule140										3	3	4
									tubule141										16	10	4										tubule141										3	2	4
									tubule142										10	21	9										tubule142										7	5	5
									tubule143										6	2	7										tubule143										6	5	4
									tubule144										7	5	14										tubule144										4	4	4
									tubule145										10	8	16										tubule145										4	5	5
									tubule146										7	12	17										tubule146										0	4	3
									tubule147										6	4	16										tubule147										2	4	3
									tubule148										7	4	20										tubule148										3	2	4
									tubule149										7	5	10										tubule149										6	2	9
									tubule150										2	14	13										tubule150										2	5	4
									tubule151										9	9	11										tubule151										5	4	5
									tubule152										6	1	13										tubule152										7	2	5
									tubule153										10	8	14										tubule153										8	2	7
									tubule154										10	5	5										tubule154										4	1	4
									tubule155										9	2	3										tubule155										4	4	1
									tubule156										6	6	10										tubule156										5	4	4
									tubule157										8	7	14										tubule157										4	6	3
									tubule158										27	6	4										tubule158										1	2	5
									tubule159										5	17	3										tubule159										11	2	2
									tubule160										9	16	3										tubule160										5	4	0
									tubule161										5	11	16										tubule161										7	5	7
									tubule162										3	5	7										tubule162										7	10	2
									tubule163										4	5	8										tubule163										2	16	5
									tubule164										7	6	9										tubule164										4	6	5
									tubule165										3	6	6										tubule165										1	10	2
									tubule166										5	6	3										tubule166										1	7	7
									tubule167										6	7	5										tubule167										2	4	3
									tubule168										7	6	5										tubule168										5	4	3
									tubule169										11	7	7										tubule169										2	2	4
									tubule170										9	10	10										tubule170										3	5	1
									tubule171										7	14	8										tubule171										4	5	4
									tubule172										6	5	7										tubule172										5	4	4
									tubule173										8	7	1										tubule173										10	4	3
									tubule174										7	5	7										tubule174										2	0	1
									tubule175										9	7	6										tubule175										4	3	5
									tubule176										8	5	4										tubule176										1	4	4
									tubule177										3	4	7										tubule177										2	9	10
									tubule178										0	9	7										tubule178										10	2	2
									tubule179										0	7	8										tubule179										2	4	2
									tubule180										4	5	58										tubule180										7	1	1
									tubule181										6	15	10										tubule181										13	10	8
									tubule182										12	35	10										tubule182										1	14	4
									tubule183										9	13	15										tubule183										4	3	4
									tubule184										12	7	7										tubule184										5	7	1
									tubule185										4	6	7										tubule185										4	0	4
									tubule186										2	9	7										tubule186										4	3	1
									tubule187										2	9	7										tubule187										6	1	4
									tubule188										10	8	26										tubule188										6	2	2
									tubule189										15	6	8										tubule189										3	4	2
									tubule190										10	9	9										tubule190										5	3	2
									tubule191										15	7											tubule191										5	2	7
									tubule192										8	12											tubule192										4	5	5
									tubule193										9	10											tubule193										5	3	5
									tubule194										5	7											tubule194										2	3	3
									tubule195										12	8											tubule195										4	4	3
									tubule196										19	8											tubule196										1	3	6
									tubule197											7											tubule197										3	1	3
									tubule198											11											tubule198										2	1	3
									tubule199											8											tubule199										5	1	3
									tubule200											5											tubule200										5	6	8
									tubule201											7											tubule201										3	3	5
									tubule202											9											tubule202										7	2	1
									tubule203											28											tubule203										8	4	6
									tubule204																						tubule204										8	7	3
																															tubule205										7	5	9
									mean	7.84615	7.51852	8.26923	9.05455	8.29268	7.56863	7.5	7.24194	8.25806	9.27551	9.84729	9.73684	9.16	8.83019	9.2	8	9.8	9.2381	8.83333	10.0909		tubule206										12	3	3
																															tubule207										0	0	6
									mean			7.87797			8.30529			7.66667			9.61988			9.0634					9.19247		tubule208										6	3	8
																															tubule209										1	4	2
																															tubule210										5	2	5
																															tubule211										3	5	5
										MVH+ cells/tubule																					tubule212										4	2	6
										Control 1-1	Control 1-2	Control 1-3	Control 2-1	Control 2-2	Control 2-3	Control 3-1	Control 3-2	Control 3-3	Control 4-1	Control 4-2	Control 4-3	Control 5-1	Control 5-2	Control 5-3	Control 6-1	Control 6-2	Control 6-3	Control 6-4	Control 6-5
									tubule1	14	11	16	15	8	11	8	6	6	9	6	7	9	19	36	19	29	17	20	17		mean	4.77273	4.69388	4.91837	3.42353	4.0119	4.06557	5.14	4.11905	4.92308	4.45755	3.86321	3.89623	6.625	7.45833	7.58824	4.2	2.34615	3.11538
									tubule2	16	11	18	11	13	10	9	2	12	19	5	6	10	17	12	15	36	20	31	37		mean			4.79499			3.83367			4.72737			4.07233			7.22386
									tubule3	8	13	9	17	12	16	12	4	8	6	11	9	9	14	30	23	23	18	35	18
									tubule4	8	8	14	20	14	12	9	13	11	7	10	6	13	14	14	29	33	20	15	14
									tubule5	14	10	11	16	13	12	12	12	7	7	14	6	8	13	15	37	10	11	25	12
									tubule6	12	10	3	12	13	17	10	12	11	20	6	3	18	35	17	21	34	18	14	26
									tubule7	12	14	5	15	16	11	5	13	11	12	14	6	13	40	15	29	23	25	25	12				MVH+ cells/tubule
									tubule8	9	11	18	13	21	12	10	9	10	11	15	8	11	16	17	20	20	14	17	23				Srsf10cKO1-1	Srsf10cKO1-2	Srsf10cKO1-3	Srsf10cKO2-1	Srsf10cKO2-2	Srsf10cKO2-3	Srsf10cKO3-1	Srsf10cKO3-2	Srsf10cKO3-3	Srsf10cKO4-1	Srsf10cKO4-2	Srsf10cKO4-3	Srsf10cKO5-1	Srsf10cKO5-2	Srsf10cKO6-1	Srsf10cKO6-2	Srsf10cKO6-3
									tubule9	9	7	10	19	16	11	10	10	14	10	16	3	13	12	17	29	28	21	21	21		tubule1	8	4	2	6	6	11	9	3	3	6	2	1	13	3	12	6	7	3
									tubule10	9	13	10	12	16	12	10	17	12	13	8	6	33	9	13	15	10	25	23	21		tubule2	10	2	4	4	2	13	9	3	7	1	3	3	10	1	8	4	4	6
									tubule11	11	8	12	15	23	12	10	18	8	13	7	6	16	15	59	13	14	20	14	17		tubule3	5	4	7	10	5	5	2	1	7	3	5	3	13	10	8	4	0	5
									tubule12	6	10	13	14	18	9	7	8	4	12	15	13	20	16	17	34	27	15	14	13		tubule4	5	3	4	3	7	3	3	7	9	5	5	0	10	8	7	7	2	0
									tubule13	12	9	14	12	30	15	6	9	10	10	13	13	20	16	18	13	28	14				tubule5	3	4	4	7	6	0	4	0	10	3	6	4	15	8	8	7	5	2
									tubule14	12	11	17	13	9	9	9	13	4	10	15	14	24	13	10	36	15	14				tubule6	3	10	2	4	7	13	10	3	6	11	3	5	11	9	7	3	5	3
									tubule15	9	13	12	19	19	12	16	21	4	10	6	11	16	11	9	16	18	16				tubule7	5	4	1	3	7	8	6	4	22	11	4	2	15	11	13	5	0	0
									tubule16	9	14	14	13	11	12	4	9	9	11	7	15	20	11	38	19		17				tubule8	3	5	9	7	9	10	9	8	4	5	4	8	11	7	15	6	4	3
									tubule17	9	15	17	10	11	14	8	5	15	10	11	14	12	14	13	20		23				tubule9	4	4	6	7	8	5	9	4	7	2	2	6	5	7	15	6	5	4
									tubule18	15	10	14	11	6	12	9	6	11	13	12	14	11	20	17	20		15				tubule10	9	7	6	4	8	6	3	6	6	4	2	8	10	8	6	6	4	0
									tubule19	9	9	9	19	11	12	10	7	10	14	13	11	14	15	14			20				tubule11	6	3	7	3	5	5	4	8	8	6	5	7	10	12	8	7	5	4
									tubule20	8	12	10	19	9	11	8	14	11	11	15	20	18	9	14			20				tubule12	2	5	1	7	4	5	7	10	9	7	3	3	8	10	8	0	0	5
									tubule21	7	9	11	11	4	15	9	9	18	15	8	7	21	7	9			25				tubule13	4	4	4	4	7	5	4	6	4	2	8	4	7	10	8	2	0	6
									tubule22	10	9	15	12	6	17	12	15	8	12	15	6	12	16	17							tubule14	10	0	7	4	6	9	7	5	3	7	4	6	6	9	11	0	8	10
									tubule23	11	8	16	13	10	11	4	16	16	14	9	6	18	19	16							tubule15	16	7	7	6	6	5	4	3	3	7	9	6	7	5	12	0	0	1
									tubule24	5	11	16	17	7	11	8	12	9	18	6	18	7	14	12							tubule16	10	3	2	1	5	6	2	3	5	3	5	1	7	15	9	0	0	6
									tubule25	9	7	10	6	5	12	8	8	9	11	7	6	20	9	10							tubule17	9	7	4	8	5	5	8	2	5	7	5	2	6	16	7	7	0	2
									tubule26	12	5	14	11	12	6	8	14	8	11	6	11	12	16	12							tubule18	5	8	8	6	7	7	7	8	6	4	5	3		13		2	0	4
									tubule27	12	5	7	8	10	6	9	8	9	15	6	15	14	25	15							tubule19	6	7	5	2	6	7	6	4	8	5	5	3		17		12	7	4
									tubule28	11	14	9	18	11	10	9	6	6	12	13	18	13	28	14							tubule20	2	5	4	5	9	10	3	7	0	5	2	5		10		10	2	4
									tubule29	5	17	11	19	10	14	12	8	13	11	16	18	12	22	8							tubule21	4	1	4	6	6	3	0	5	10	2	10	5		9		10	0	0
									tubule30	9	14	7	12	11	28	6	9	7	10	9	11	8	17								tubule22	6	15	4	2	6	3	4	8	4	7	5	5		11		0	0	0
									tubule31	14	17	9	16	28	19	7	6	8	3	10	12	10	14								tubule23	4	8	8	2	5	10	4	8	7	5	5	4		16		6	1	0
									tubule32	10	13	15	13	8	16	10	7	15	4	10	10	14	16								tubule24	5	16	1	3	5	0	6	6	7	8	5	4		13			7	0
									tubule33	22	12	12	30	11	17	12	11	21	6	8	9	14	20								tubule25	6	3	4	3	7	7	3	6	4	10	7	7						5
									tubule34	8	9	49	11	12	17	13	9	8	7	9	16	9	17								tubule26	6	6	4	5	3	7	2	7	8	10	5	3						7
									tubule35	8	10	6	12	13	11	13	7	14	9	17	14	19	14								tubule27	5	7	7	5	7	3	4	6	8	12	4	1						3
									tubule36	8	21	10	8	16	11	5	5	14	18	10	14	7	12								tubule28	4	3	14	5	9	0	9	5	5	10	2	4
									tubule37	10	10	18	14	8	4	10	5	10	21	14	16	22	12								tubule29	7	4	16	1	5	4	6	6	3	11	8	5
									tubule38	10	8	16	8	8	6	16	15	15	15	11	9	11	12								tubule30	6	5	6	5	4	0	5	12	2	2	2	2
									tubule39	13	8	11	13	9	7	10	8		6	10	5	10	10								tubule31	7	1	9	5	5	6	10	9	0	2	4	6
									tubule40	14	9	9	7	14	10	7	6		8	11	22	8	17								tubule32	2	2	3	2	5	7	11	8	10	4	7	5
									tubule41	18	10	8	16	11	9	8	10		15	22	17	6	11								tubule33	6	5	7	5	6	7	5	6	3	2	6	2
									tubule42	11	9	12	12		9	9	12		23	18	22	22	31								tubule34	2	5	4	1	3	11	11	3	1	7	3	5
									tubule43	12	10	9	7		9	18	6		15	17	11	12	33								tubule35	8	5	3	1	5	5	11	3	3	6	2	1
									tubule44	7	12	9	13		2	11	6		17	41	13		12								tubule36	3	9	11	1	3	4	4	0	4	3	2	6
									tubule45	11	7	6	15		10	9	7		11	4	9		14								tubule37	8	8	2	4	2	8	4	2	8	5	3	4
									tubule46	8	8	8	14		4	12	6		11	10	26		11								tubule38	3	6	6	3	4	3	14	7	4	6	3	6
									tubule47	16	11	23	21		8		10		7	11	31		10								tubule39	1	2	1	2	1	3	7	4	0	2	5	4
									tubule48	10	12	13	6		10		11		39	24	10		13								tubule40	6	6	5	4	2	5	7	7	3	6	3	2
									tubule49	13	13	17	10		11		12		11	9	11		12								tubule41	8	5	6	3	7	4	7	13	7	6	3	10
									tubule50	9	13	11	15		8		12		11	2	9		16								tubule42	4	6	11	5	9	5	6	1	9	3	4	4
									tubule51	17	15	11	11		20		10		19	8	8		31								tubule43	5	5	8	2	4	8	4		3	1	1	9
									tubule52	11	8	7	13		8		12		5	14	15										tubule44	6	6	3	4	7	8	6		2	7	3	1
									tubule53	20	16	7	14				10		13	44	12										tubule45	5	2	7	6	3	7	4		5	3	3	1
									tubule54	8	13	17	19				5		12	8	11										tubule46	9	7	5	3	5	3	7		6	4	5	2
									tubule55	7	14	5	22				9		21	9	13										tubule47	4	13	6	3	5	5	4		10	7	7	1
									tubule56	10	15	8	16				7		8	8	4										tubule48	3	10	11	2	6	8	7		10	3	1	3
									tubule57	5	11	13	11				7		9	22	11										tubule49	12	3		2	3	5	7		8	2	7	3
									tubule58	9	14		10						14	17	11										tubule50				2	6	4	7		12	3	2	4
									tubule59	7	2		14						10	24	13										tubule51				1	6	4	7			1	1	6
									tubule60	12	7								4	12	6										tubule52				1	4	7	1			3	5	5
									tubule61	11	9								9	7	6										tubule53				5	6	5	5			9	1	8
									tubule62	10	8								13	9	9										tubule54				0	4	3	14			5	3	4
									tubule63	8	5								9	13	9										tubule55				3	1	2	8			11	6	4
									tubule64	8	6								10	8	12										tubule56				2	5	4	7			4	5	1
									tubule65	11	8								9	12	23										tubule57				1	6	5				3	4	4
									tubule66	11	7								9	16	20										tubule58				2	7	6				6	5	2
									tubule67	7	9								12	11	12										tubule59				4	5	2				7	6	2
									tubule68	7	11								8	11	15										tubule60				1	1	1				6	2	4
									tubule69	7	9								9	15	11										tubule61				1	2	2				4	4	5
									tubule70	7	9								9	8	10										tubule62				3	5	2				8	3	4
									tubule71	11	9								9	17	18										tubule63				4	5	6				2	0	5
									tubule72	8	9								7	12	13										tubule64				2	7	8				1	8	8
									tubule73		9								11	8	9										tubule65				2	4	2				7	0	6
									tubule74		5								17	9	14										tubule66				3	5					8	4	5
									tubule75		6								23	10	13										tubule67				7	2					3	7	3
									tubule76		10								7	14	15										tubule68				4	7					8	7	5
									tubule77		15								11	13	3										tubule69				6	5					5	10	1
									tubule78		17								10	25	5										tubule70				3	4					2	11	3
									tubule79		11								15	8	4										tubule71				3	5					5	7	2
									tubule80		21								12	11	8										tubule72				3	4					6	2	1
									tubule81		13								8	16	9										tubule73				4	4					7	5	3
									tubule82		5								6	4	4										tubule74				5	4					6	3	1
									tubule83		8								8	15	4										tubule75				3	4					6	0	3
									tubule84		15								13	10	10										tubule76				1	2					7	2	4
									tubule85										14	23	14										tubule77				8	2					2	8	4
									tubule86										25	5	17										tubule78				8	8					9	4	13
									tubule87										29	8	10										tubule79				3	3					4	2	2
									tubule88										12	19	11										tubule80				2	5					4	3	4
									tubule89										19	14	9										tubule81				3	2					6	5	3
									tubule90										17	9	16										tubule82				5	1					4	7	5
									tubule91										7	6	16										tubule83				4	2					5	4	3
									tubule92										7	14	14										tubule84				5	0					4	4	4
									tubule93										9	11	4										tubule85				6						6	3	5
									tubule94										10	5	20										tubule86				7						9	5	4
									tubule95										28	10	11										tubule87				0						8	5	7
									tubule96										26	5	7										tubule88				5						3	3	1
									tubule97										10	7	14										tubule89				4						4	7	10
									tubule98										7	2	10										tubule90										8	5	6
									tubule99										11	7	24										tubule91										5	6	5
									tubule100										12	7	28										tubule92										5	3	5
									tubule101										8	5	11										tubule93										5	5	5
									tubule102										7	10	8										tubule94										2	2	5
									tubule103										9	12	8										tubule95										7	3	8
									tubule104										3	4	8										tubule96										3	1	6
									tubule105										4	11	6										tubule97										3	1	9
									tubule106										12	8	7										tubule98										5	7	4
									tubule107										13	9	5										tubule99										8	5	4
									tubule108										8	9	3										tubule100										4	2	2
									tubule109										9	8	2										tubule101										2	3	5
									tubule110										8	9	9										tubule102										6	6	6
									tubule111										11	6	5										tubule103										6	3	4
									tubule112										12	4	6										tubule104										6	5	7
									tubule113										18	7	7										tubule105										4	5	1
									tubule114										11	13	6										tubule106										8	4	7
									tubule115										2	9	7										tubule107										6	4	6
									tubule116										8	11	6										tubule108										7	4	3
									tubule117										8	15	6										tubule109										7	4	5
									tubule118										7	8	10										tubule110										3	4	6
									tubule119										8	12	7										tubule111										8	4	2
									tubule120										8	9	5										tubule112										6	1	5
									tubule121										14	4	11										tubule113										5	4	6
									tubule122										7	9	16										tubule114										4	4	9
									tubule123										7	13	13										tubule115										2	3	6
									tubule124										7	7	9										tubule116										6	2	5
									tubule125										7	9	7										tubule117										7	2	2
									tubule126										7	16	7										tubule118										8	5	6
									tubule127										4	11	8										tubule119										9	9	0
									tubule128										4	5	1										tubule120										4	5	7
									tubule129										12	12	9										tubule121										6	4	2
									tubule130										15	14	6										tubule122										7	4	7
									tubule131										6	9	5										tubule123										4	6	3
									tubule132										11	10	7										tubule124										5	7	3
									tubule133										8	11	7										tubule125										5	4	7
									tubule134										15	18	7										tubule126										3	6	7
									tubule135										8	8	7										tubule127										7	5	2
									tubule136										4	8	9										tubule128										2	9	3
									tubule137										4	7	13										tubule129										4	5	6
									tubule138										10	7	14										tubule130										5	8	6
									tubule139										7	13	73										tubule131										5	6	3
									tubule140										0	13	9										tubule132										6	9	3
									tubule141										6	9	23										tubule133										7	1	1
									tubule142										7	11	11										tubule134										7	2	3
									tubule143										9	7	28										tubule135										13	2	8
									tubule144										7	11	8										tubule136										1	4	4
									tubule145										11	2	8										tubule137										6	4	6
									tubule146										49	9	5										tubule138										2	2	2
									tubule147										16	6	24										tubule139										0	5	4
									tubule148										10	7	13										tubule140										3	1	5
									tubule149										7	7	11										tubule141										6	6	5
									tubule150										16	5	9										tubule142										7	4	8
									tubule151										4	7	20										tubule143										4	1	10
									tubule152										8	13	20										tubule144										5	2	12
									tubule153										16	7	8										tubule145										4	10	12
									tubule154										12	7	9										tubule146										6	6	17
									tubule155										8	1	9										tubule147										5	6	14
									tubule156										4	12	14										tubule148										6	4	5
									tubule157										13	11	14										tubule149										5	4	1
									tubule158										10	26	10										tubule150										1	20	1
									tubule159										21	20	10										tubule151										6	2	5
									tubule160										12	2	9										tubule152										14	6	1
									tubule161										16	6	8										tubule153										2	3	1
									tubule162										19	6	9										tubule154										4	5	0
									tubule163										17	6	10										tubule155										4	4	4
									tubule164										11	7	5										tubule156										7	7	4
									tubule165										7	5	5										tubule157										2	7	3
									tubule166										9	5	9										tubule158										6	4	4
									tubule167										23	8	8										tubule159										12	5	3
									tubule168										4	7	6										tubule160										5	5	9
									tubule169										7	9	8										tubule161										1	1	0
									tubule170										4	5	13										tubule162										7	5	5
									tubule171										5	7	28										tubule163										9	4	8
									tubule172										6	4	9										tubule164										7	4	4
									tubule173										4	11	8										tubule165										6	0	6
									tubule174										6	16	6										tubule166										6	5	5
									tubule175										8	9	9										tubule167										4	0	4
									tubule176										7	8	6										tubule168										4	1	3
									tubule177										8	32	7										tubule169										3	4	5
									tubule178										4	12	6										tubule170										8	1	3
									tubule179										7	12	10										tubule171										4	1	3
									tubule180										35	6	9										tubule172										1	4	6
									tubule181										7	7	13										tubule173										2	4	6
									tubule182										7	9	15										tubule174										0	1	5
									tubule183										8	9	9										tubule175										2	5	6
									tubule184										6	7	7										tubule176										2	7	5
									tubule185										4	7	7										tubule177										5	16	6
									tubule186										11	8	6										tubule178										6	7	5
									tubule187										10	6	9										tubule179										4	3	7
									tubule188										12	8	9										tubule180										9	4	3
									tubule189										11	8	6										tubule181										3	3	3
									tubule190										11	8	6										tubule182										3	11	1
									tubule191											8	9										tubule183										6	1	8
									tubule192											7	11										tubule184										1	8	4
									tubule193											7	2										tubule185										5	5	6
									tubule194											7	8										tubule186										6	5	2
									tubule195											7	6										tubule187										6	1	5
									tubule196											18	6										tubule188										8	6	5
									tubule197											10	3										tubule189										4	4	5
									tubule198											11	4										tubule190										7	2	3
									tubule199											5	3										tubule191										5	2	5
									tubule200											5	7										tubule192										4	2	5
									tubule201											6	17										tubule193										3	13	4
									tubule202											9	3										tubule194										3	7	7
									tubule203											15	24										tubule195										3	3	6
									tubule204											9	12										tubule196										6	5	3
									tubule205											7	13										tubule197										4	4	4
									tubule206											9	8										tubule198										5	9	4
									tubule207												8										tubule199										6	6	5
									tubule208												9										tubule200										1	7	6
									tubule209												3										tubule201										3	3	2
									tubule210												7										tubule202										1	4	2
									tubule211												9										tubule203										4	4	3
									tubule212												4										tubule204										4	1	3
									tubule213												5										tubule205										3	0	3
									tubule214												7										tubule206										2	3	0
									tubule215												8										tubule207										2	8	4
									tubule216												9										tubule208										1	3	4
									tubule217												7										tubule209										2	3	5
									tubule218												5										tubule210										4	5	8
									mean	10.3611	10.5833	12.2982	13.7797	12.5122	11.5	9.5	9.54386	10.4211	11.0368	10.4029	10.5229	14.1628	16.4706	17.5172	22.6667	23.2	18.4762	21.1667	19.25		tubule211										4	3	9
									mean			11.0809			12.5973			9.82164			10.6542			16.0502					20.9519		tubule212										12	4	2
																															tubule213										7	2	6
																															tubule214										4	2	3
																															tubule215										3	5	5
																															tubule216										3	2	4
																															tubule217										3	5	5
																															tubule218										2	4	4
																															tubule219										4	5	2
																															tubule220										4	5	3
																															tubule221										4	1	3
																															tubule222										9	1	2
																															tubule223										1	2	2
																															tubule224										1	1	5
																															tubule225										0	3	5
																															tubule226										2	2	2
																															tubule227										6	4	2
																															tubule228										7	5	2
																															tubule229										2	1	0
																															tubule230										1	4	3
																															tubule231										3	2	3
																															tubule232										1	0	3
																															tubule233										6	3	3
																															tubule234										2	2	4
																															tubule235										5	6	5
																															tubule236										6	4	1
																															tubule237										4	5	4
																															tubule238										3		4
																															tubule239										3		2
																															tubule240										5		6
																															tubule241										13		6
																															mean	5.71429	5.5102	5.625	3.73034	4.88095	5.38462	6.14286	5.40476	5.96	4.91286	4.25738	4.37344	9.64706	9.91667	9.52941	4.78261	2.75	3.22222
																															mean			5.6165			4.6653			5.83587			4.51456			9.69771
[truncated: 3 more columns]

## Sheet: Figure 3D
Figure 3D-source data:The number of KIT+ cells per 100mm seminiferous tubule in P8 testes.
		length of seminiferous tubule (mm)	Number of KIT+ cells	Number of KIT+ cells per mm seminiferous tubule	Number of KIT+ cells per 100mm seminiferous tubule			length of seminiferous tubule (mm)	Number of KIT+ cells	Number of KIT+ cells per mm seminiferous tubule	Number of KIT+ cells per 100mm seminiferous tubule			Number of KIT+ cells per 100mm seminiferous tubule
	1	1038.1	236	0.227338	22.7338									Control	Srsf10-cKO
Control-1	2	787.29	202	0.256576	25.6576	Srsf10cKO-1	1	430.58	26	0.0603837	6.03837			21.1255	8.42242
	3	717.51	91	0.126828	12.6828		2	759.35	20	0.0263383	2.63383			23.9532	8.79635
	4	761.84	97	0.127323	12.7323		3	898.84	94	0.104579	10.4579			22.0061	6.10397
	5	1228.59	283	0.230345	23.0345		4	638.4	42	0.0657895	6.57895			25.128	11.4717
	6	1174.32	285	0.242694	24.2694		5	811.48	67	0.0825652	8.25652			26.4585	8.72048
	7	924.32	124	0.134153	13.4153		6	1089.47	177	0.162464	16.2464			20.8114	9.67992
	8	681.06	132	0.193816	19.3816		7	949.12	83	0.0874494	8.74494
	9	900.68	225	0.249811	24.9811		mean				8.42242		mean	23.2471	8.86581
	10	703.19	191	0.271619	27.1619
	11	736.79	194	0.263304	26.3304	Srsf10cKO-2	1	727.82	65	0.0893078	8.93078		T-Test	4.70492e-07
	mean				21.1255		2	663.12	37	0.0557968	5.57968
							3	872.03	91	0.104354	10.4354
Control-2	1	1044.85	328	0.313921	31.3921		4	734.99	28	0.0380958	3.80958
	2	723.07	225	0.311173	31.1173		5	629.64	87	0.138174	13.8174
	3	672.92	149	0.221423	22.1423		6	408.52	34	0.0832273	8.32273
	4	757.34	220	0.29049	29.049		7	830.84	100	0.12036	12.036
	5	858.57	157	0.182862	18.2862		8	739.33	55	0.0743917	7.43917
	6	769.57	160	0.207908	20.7908		mean				8.79635
	7	877.19	173	0.197221	19.7221
	8	821.99	186	0.22628	22.628	Srsf10cKO-3	1	1168.91	92	0.0787058	7.87058
	9	743.28	163	0.219298	21.9298		2	1172.35	74	0.0631211	6.31211
	10	654.08	147	0.224743	22.4743		3	804.02	12	0.014925	1.4925
	mean				23.9532		4	887.34	65	0.0732526	7.32526
							5	736.32	45	0.0611147	6.11147
Control-3	1	618.55	151	0.244119	24.4119		6	1319.23	109	0.082624	8.2624
	2	946.17	200	0.211379	21.1379		7	728.5	39	0.0535347	5.35347
	3	672	137	0.203869	20.3869		mean				6.10397
	4	904.45	141	0.155896	15.5896
	5	875.87	192	0.219211	21.9211	Srsf10cKO-4	1	796.4	111	0.139377	13.9377
	6	781.33	180	0.230376	23.0376		2	883.75	99	0.112023	11.2023
	7	709.17	203	0.28625	28.625		3	979.86	55	0.0561305	5.61305
	8	702.04	147	0.20939	20.939		4	756.43	75	0.09915	9.915
	mean				22.0061		5	875.59	109	0.124487	12.4487
							6	716.2	66	0.092153	9.2153
Control-4	1	797.62	215	0.269552	26.9552		7	733.98	103	0.140331	14.0331
	2	728.41	279	0.383026	38.3026		8	794.22	71	0.0893959	8.93959
	3	722.18	151	0.209089	20.9089		9	1073.07	203	0.189177	18.9177
	4	766.18	151	0.197082	19.7082		10	1343.49	141	0.104951	10.4951
	5	690.01	160	0.231881	23.1881		mean				11.4717
	6	1050.03	319	0.303801	30.3801
	7	713.41	211	0.295763	29.5763	Srsf10cKO-5	1	577.53	73	0.1264	12.64
	8	836.7	205	0.24501	24.501		2	786.56	88	0.11188	11.188
	9	979.79	202	0.206167	20.6167		3	814.91	64	0.0785363	7.85363
	10	769.97	132	0.171435	17.1435		4	808.65	40	0.0494652	4.94652
	mean				25.128		5	758.62	71	0.093591	9.3591
							6	719.88	56	0.0777907	7.77907
Control-5	1	634.71	162	0.255235	25.5235		7	660.81	57	0.0862578	8.62578
	2	922.67	284	0.307802	30.7802		8	963.14	71	0.0737172	7.37172
	3	1128.35	318	0.281827	28.1827		mean				8.72048
	4	863.1	234	0.271116	27.1116
	5	792.76	178	0.224532	22.4532	Srsf10cKO-6	1	793.43	96	0.120994	12.0994
	6	720.65	178	0.246999	24.6999		2	926.73	54	0.0582694	5.82694
	mean				26.4585		3	624.9	58	0.0928149	9.28149
							4	749.64	111	0.148071	14.8071
Control-6	1	834.23	214	0.256524	25.6524		5	729.56	61	0.083612	8.3612
	2	758.93	150	0.197647	19.7647		6	739.66	62	0.0838223	8.38223
	3	888.4	203	0.228501	22.8501		7	757.2	80	0.105652	10.5652
	4	397.13	103	0.259361	25.9361		8	726.98	59	0.0811577	8.11577
	5	884.38	143	0.161695	16.1695		mean				9.67992
	6	689.87	100	0.144955	14.4955
	mean				20.8114

## Sheet: Figure 3E
Figure3E-source data: The number of PLZF+MVH+ cells and MVH+PLZF- cells per tubule cross-section in P6 testes.
								The detailed information of Figure 3E
									PLZF+ cells/tubule																			MVH+ cells/tubule
	MVH+ cells/tubule	mean	PLZF+ cells/tubule	mean	MVH+PLZF- cells	mean			Control 1-1	Control 1-2	Control 1-3	Control 2-1	Control 2-2	Control 2-3	Control 3-1	Control 3-2	Control 3-3	Srsf10cKO1-1	Srsf10cKO1-2	Srsf10cKO1-3	Srsf10cKO2-1	Srsf10cKO2-2	Srsf10cKO2-3	Srsf10cKO3-1	Srsf10cKO3-2			Control 1-1	Control 1-2	Control 1-3	Control 2-1	Control 2-2	Control 2-3	Control 3-1	Control 3-2	Control 3-3	Srsf10cKO1-1	Srsf10cKO1-2	Srsf10cKO1-3	Srsf10cKO2-1	Srsf10cKO2-2	Srsf10cKO2-3	Srsf10cKO3-1	Srsf10cKO3-2
Control 1-1	7.5		6.24603		1.25397			tubule1	5	6	6	4	5	4	4	5	7	5	4	2	3	5	3	2	1		tubule1	10	5	6	4	4	6	3	15	6	3	5	2	6	5	1	3	3
Control 1-2	7.2437		6.20492		1.03878			tubule2	5	7	7	3	4	4	6	16	5	1	2	3	4	3	3	3	3		tubule2	5	8	6	4	4	6	8	6	7	3	5	3	5	4	8	3	1
Control 1-3	7.29921	7.34764	7.10924	6.52006	0.189969	0.827572		tubule3	7	5	7	3	4	1	9	6	8	4	10	3	5	3	0	3	1		tubule3	8	7	6	5	3	4	9	7	5	4	8	4	5	0	6	3	3
Control 2-1	6.24476		5.11565		1.12911			tubule4	4	6	6	2	3	5	3	7	5	3	5	4	5	4	2	3	2		tubule4	6	9	7	2	3	5	8	5	3	3	7	6	0	3	6	5	4
Control 2-2	5.94667		5.57595		0.370717			tubule5	9	7	3	5	1	5	15	5	3	3	1	2	0	0	5	0	0		tubule5	13	6	7	6	5	4	9	7	5	8	4	4	4	3	4	4	0
Control 2-3	6.24503	6.14549	5.83784	5.50981	0.407195	0.635674		tubule6	8	5	7	3	6	6	7	4	5	2	1	2	7	3	13	1	1		tubule6	8	7	3	2	6	15	9	4	5	1	3	6	7	8	3	1	2
Control 3-1	5.30872		4.7		0.608725			tubule7	3	3	4	4	8	8	6	4	4	2	5	10	7	3	3	5	3		tubule7	4	4	8	5	7	10	18	2	9	7	1	11	11	3	0	1	1
Control 3-2	5.32168		4.69504		0.626643			tubule8	8	6	6	2	3	12	3	2	7	3	4	1	5	3	1	3	5		tubule8	10	4	4	8	8	6	8	4	8	1	6	5	5	2	2	5	3
Control 3-3	5.56716	5.39919	4.88079	4.75861	0.686369	0.640579		tubule9	3	4	6	2	1	4	4	7	8	1	0	4	12	7	1	1	1		tubule9	10	8	6	3	3	6	7	4	6	9	5	6	12	4	5	3	6
								tubule10	8	7	7	6	2	5	5	4	6	4	4	5	3	2	2	3	5		tubule10	10	9	10	2	1	6	4	13	4	1	5	3	5	3	2	2	3
	MVH+ cells/tubule	mean	PLZF+ cells/tubule	mean	MVH+PLZF- cells	mean		tubule11	8	7	2	8	8	4	8	9	3	3	6	6	3	2	2	0	0		tubule11	4	6	8	10	3	7	5	4	8	8	6	7	1	4	3	4	5
Srsf10cKO1-1	4.61538		4.08571		0.52967			tubule12	8	11	7	1	7	6	4	5	5	8	6	2	7	2	1	1	2		tubule12	9	12	6	4	5	7	6	8	6	3	4	7	2	4	2	6	4
Srsf10cKO1-2	4.53226		3.88406		0.6482			tubule13	3	5	6	2	6	6	2	7	3	5	8	4	10	5	4	1	4		tubule13	11	6	6	2	4	9	5	6	4	3	8	7	1	4	6	1	2
Srsf10cKO1-3	5.03947	4.72904	4.07895	4.01624	0.960526	0.712799		tubule14	6	6	8	8	2	8	2	12	5	5	3	2	4	3	3	2	0		tubule14	4	7	6	8	10	6	3	9	2	6	5	3	5	5	2	3	3
Srsf10cKO2-1	4.92308		4.05161		0.871464			tubule15	8	5	6	4	5	2	8	3	14	1	3	5	2	1	5	1	1		tubule15	10	6	4	9	9	14	3	2	3	8	7	3	4	5	6	1	0
Srsf10cKO2-2	4.57595		3.87421		0.701736			tubule16	9	11	5	5	3	1	10	8	11	3	3	5	1	3	3	1	2		tubule16	10	11	8	6	5	8	12	5	4	5	2	12	3	0	2	2	3
Srsf10cKO2-3	4.64671	4.71524	3.51449	3.81344	1.13221	0.901804		tubule17	3	5	10	6	5	4	1	2	9	2	5	4	1	4	1	3	2		tubule17	9	4	4	9	8	2	6	6	5	3	5	4	9	2	2	2	2
Srsf10cKO3-1	3.71875		3.05641		0.66234			tubule18	5	6	12	5	5	5	7	7	12	3	3	7	2	2	5	2	1		tubule18	8	6	4	7	6	2	7	8	4	6	4	2	1	3	3	3	3
Srsf10cKO3-2	3.35233	3.53554	2.96135	3.00888	0.390979	0.526659		tubule19	6	5	10	7	9	2	4	6	7	4	1	3	4	0	2	6	2		tubule19	7	5	14	9	6	5	12	9	2	2	5	5	6	4	5	4	4
								tubule20	10	7	7	4	3	3	1	6	7	3	7	7	3	0	4	6	2		tubule20	8	6	6	9	8	6	7	4	4	9	1	7	11	4	5	4	2
								tubule21	8	3	5	4	4	5	3	2	4	2	5	4	2	6	2	1	2		tubule21	12	4	5	9	15	8	9	4	4	3	5	4	4	2	4	5	1
								tubule22	8	14	7	8	8	2	7	5	3	8	0	3	4	6	2	1	1		tubule22	8	16	8	6	14	3	1	2	5	3	2	5	3	6	3	3	4
	MVH+PLZF+ cells/tubule			MVH+PLZF- cells/tubule				tubule23	6	2	6	2	11	4	11	3	7	4	6	7	1	3	2	2	3		tubule23	7	4	8	6	8	4	7	10	6	9	0	2	5	3	3	3	4
	Control	Srsf10-cKO		Control	Srsf10-cKO			tubule24	6	8	3	6	7	2	6	4	2	5	6	3	7	4	3	2	4		tubule24	9	11	6	5	5	3	8	2	2	6	5	2	4	2	4	4	5
	6.52006	4.01624		0.827572	0.712799			tubule25	4	4	17	5	15	12	6	3	4	3	4	5	3	3	2	3	5		tubule25	3	13	8	7	6	3	1	5	2	3	5	3	3	3	3	4	3
	5.50981	3.81344		0.635674	0.901804			tubule26	13	10	4	4	14	2	10	7	7	3	5	3	3	2	3	3	5		tubule26	11	6	8	4	4	4	8	8	3	2	7	4	3	4	4	4	4
	4.75861	3.00888		0.640579	0.526659			tubule27	4	7	7	6	7	15	5	3	4	1	10	1	3	3	1	4	10		tubule27	6	9	7	7	7	5	4	5	4	4	1	3	3	12	2	2	3
mean	5.59616	3.61285	mean	0.701275	0.713754			tubule28	3	7	11	5	4	8	4	3	6	7	0	2	1	13	4	6	4		tubule28	7	9	6	8	8	4	4	3	6	4	9	2	2	6	5	3	3
T-test	0.0391678		T-test	0.926589				tubule29	5	10	3	7	3	3	9	5	6	4	3	1	2	2	1	3	2		tubule29	3	6	10	7	3	5	4	5	4	7	6	8	1	5	3	2	5
								tubule30	6	6	7	7	10	6	5	5	6	1	3	2	4	3	4	4	3		tubule30	21	10	12	10	4	7	7	5	7	4	3	2	4	6	1	2	6
								tubule31	8	5	8	10	6	7	3	5	3	2	4	4	7	1	5	4	4		tubule31	22	8	7	5	5	2	9	3	5	4	3	11	6	2	5	4	2
	All mounted tubules							tubule32	4	6	9	3	5	8	5	3	2	2	11	0	5	3	4	2	1		tubule32	2	11	4	3	7	2	4	4	4	3	8	6	6	3	5	5	4
	Control	Srsf10-cKO						tubule33	6	4	6	2	6	4	3	4	6	0	1	5	5	3	6	3	0		tubule33	10	9	14	5	6	5	5	8	2	5	2	3	7	10	2	3	4
	126	70						tubule34	11	8	8	5	6	6	9	1	4	5	2	1	4	2	1	8	1		tubule34	8	13	6	5	2	5	5	6	8	7	2	6	4	3	8	5	8
	122	69						tubule35	17	10	9	2	11	7	2	7	3	3	4	7	1	1	1	4	2		tubule35	5	4	8	1	6	4	8	6	1	4	11	3	4	5	2	3	1
	119	76						tubule36	5	13	10	3	6	7	3	4	2	1	2	3	4	6	5	0	4		tubule36	14	5	12	5	8	3	4	5	3	5	6	5	6	2	4	3	4
	147	155						tubule37	10	8	14	3	4	5	3	2	6	3	3	4	5	9	6	3	7		tubule37	5	7	3	7	13	6	5	4	5	1	2	2	6	3	5	3	2
	158	159						tubule38	3	3	14	7	1	2	8	3	4	6	2	3	4	2	3	3	3		tubule38	8	5	7	13	5	6	5	5	3	4	2	3	5	4	3	11	5
	148	138						tubule39	4	4	5	4	2	4	2	5	1	3	2	1	4	4	10	1	4		tubule39	6	11	9	5	6	6	5	3	2	3	4	1	7	2	5	5	3
	150	195						tubule40	9	8	8	3	8	4	3	7	3	3	2	3	2	2	3	3	3		tubule40	6	10	9	6	6	8	6	4	2	4	6	3	6	2	5	0	2
	141	207						tubule41	7	1	8	1	4	5	3	2	2	3	2	2	4	3	3	4	0		tubule41	8	7	10	6	6	3	5	6	2	3	4	4	7	3	5	3	0
	151							tubule42	8	7	5	9	7	6	7	7	4	3	7	1	7	3	5	2	4		tubule42	4	8	14	6	10	6	3	7	3	3	4	3	6	5	7	1	4
								tubule43	17	15	7	2	8	2	7	3	4	4	8	1	5	2	6	3	1		tubule43	6	4	13	3	8	12	4	4	3	3	4	4	10	2	1	4	3
	1262	1069						tubule44	11	18	11	7	3	5	5	4	2	3	2	4	0	5	4	2	3		tubule44	9	7	9	6	4	2	3	2	5	2	4	4	6	3	5	1	1
								tubule45	7	11	5	4	5	5	4	5	0	2	1	4	2	6	3	2	2		tubule45	3	8	5	5	8	7	2	4	5	1	15	5	6	5	1	2	2
								tubule46	6	6	3	4	4	7	3	8	3	2	3	3	4	6	4	1	2		tubule46	8	1	8	5	4	6	3	7	5	9	3	5	0	7	4	2	2
								tubule47	9	5	4	5	7	2	3	8	4	5	3	4	3	2	2	3	0		tubule47	10	7	11	4	7	6	9	5	0	3	4	3	2	6	3	0	5
								tubule48	1	13	7	9	1	5	2	6	6	4	6	0	3	6	0	2	2		tubule48	9	15	7	8	4	5	5	7	10	15	4	0	6	3	6	2	0
								tubule49	5	8	4	5	5	7	4	3	4	9	3	4	7	5	4	0	2		tubule49	9	8	5	10	1	7	4	3	2	3	2	8	4	14	10	3	2
								tubule50	6	8	6	4	6	9	2	2	3	4	4	4	2	5	4	2	3		tubule50	8	16	6	3	1	8	3	6	3	3	1	13	4	3	4	3	3
								tubule51	3	3	5	4	13	8	5	2	2	5	5	11	6	0	9	2	2		tubule51	18	13	7	5	8	6	4	4	0	4	5	11	5	3	4	2	2
								tubule52	13	4	7	6	4	6	3	7	6	8	3	6	12	3	0	2	1		tubule52	15	7	7	5	2	6	3	3	2	5	3	3	5	2	7	1	6
								tubule53	13	3	9	5	5	5	5	1	6	7	2	0	4	8	5	2	1		tubule53	9	7	6	8	7	2	5	2	5	4	6	4	7	4	6	2	2
								tubule54	4	4	3	1	5	3	6	1	1	4	4	2	5	4	3	1	1		tubule54	5	14	7	0	6	2	5	8	2	5	5	4	9	7	13	1	1
								tubule55	11	8	4	1	1	9	5	2	2	1	3	1	6	7	5	2	2		tubule55	5	8	4	8	5	10	8	5	4	6	7	6	4	6	4	4	2
								tubule56	2	3	12	3	7	7	1	4	2	3	0	3	4	5	7	1	3		tubule56	12	7	8	19	5	4	3	3	4	8	2	3	4	5	3	4	4
								tubule57	4	3	7	5	6	0	1	8	2	6	11	8	5	2	1	6	5		tubule57	6	3	17	6	8	0	4	4	8	6	11	2	5	3	6	3	7
								tubule58	5	5	5	6	6	4	2	1	0	8	9	8	4	2	3	1	3		tubule58	6	4	5	7	6	6	10	2	6	5	3	3	3	3	2	4	2
								tubule59	8	17	15	7	5	5	5	2	2	5	1	4	5	4	0	2	6		tubule59	9	7	12	9	5	9	9	2	8	5	3	10	4	4	15	5	4
								tubule60	13	5	7	3	17	3	2	7	1	4	3	5	2	11	4	5	3		tubule60	5	10	11	3	6	3	7	4	4	4	2	0	3	10	5	1	3
								tubule61	5	3	6	5	8	2	6	3	1	4	1	0	5	2	1	5	5		tubule61	7	12	3	8	4	4	6	9	4	5	2	9	2	6	4	5	5
								tubule62	6	14	3	4	1	4	11	3	5	11	2	0	10	6	2	3	3		tubule62	11	5	4	10	2	8	6	7	4	4	2	6	3	5	6	4	4
								tubule63	6	10	4	4	6	5	18	1	3	0	5	5	5	5	2	3	7		tubule63	6	9	6	5	5	5	7	5	2	8		6	4	7	6	5	4
								tubule64	7	6	8	16	9	5	9	1	2	6	1	6	5	1	2	3	3		tubule64	11	6	16	4	6	4	5	6	2	3		10	4	1	7	4	3
								tubule65	4	4	4	6	1	3	5	4	2	1	10	7	4	11	7	5	2		tubule65	4	8	16	4	7	5	8	6	7	5		0	7	3	7	3	4
								tubule66	4	6	6	5	7	6	6	3	2	3	4	10	3	2	2	4	3		tubule66	5	3	8	5	16	4	1	1	3			5	5	4	1	4	3
								tubule67	6	5	3	7	7	7	4	6	4	13	2	8	5	4	2	3	0		tubule67	4	3	3	6	8	6	4	3	5			8	2	5	3	6	2
								tubule68	4	3	1	6	9	2	4	5	2	4	4	5	2	11	3	2	3		tubule68	8	7	8	4	6	2	3	7	6			9	16	4	6	2	3
								tubule69	6	12	6	10	0	3	5	6	10	4	3	13	3	1	4	1	2		tubule69	5	6	4	6	3	4	4	4	4			6	3	5	4	2	1
								tubule70	7	3	7	6	4	8	11	4	3	19		3	3	3	3	2	2		tubule70	5	16	5	0	7	0	0	3	8			4	3	5	6	2	3
								tubule71	7	3	7	3	4	0	11	2	6			7	5	3	3	4	2		tubule71	5	11	3	0	9	0	3	5	2			3	3	3	11	1	2
								tubule72	2	7	5	6	5	0	5	0	4			2	3	3	2	1	5		tubule72	8	6	4	6	3	5	5	2	2			13	3	3	7	1	2
								tubule73	4	5	7	9	7	6	5	3	3			8	4	5	3	4	0		tubule73	7	4	5	7	8	4	1	0	2			9	3	4	3	3	6
								tubule74	4	5	9	0	7	9	4	5	5			2	3	3	3	2	1		tubule74	8	10	5	8	7	3	4	3	7			2	6	3	2	1	1
								tubule75	5	3	16	8	2	8	1	7	2			12	12	1	2	4	3		tubule75	5	13	8	1	9	6	4	8	6			11	3	3	2	4	1
								tubule76	2	7	16	5	0	4	3	2	4			4	2	8	2	3	0		tubule76	1	4	13	8	8	5	5	6	3			2	4	8	10	6	4
								tubule77	6	12	6	7	4	8	4	2	3				2	3	5	1	6		tubule77	5	4	7	2	5	2	4	5	4				5	3	6	4	4
								tubule78	6	5	3	12	3	2	0	5	4				1	4	6	3	5		tubule78	14	7	9	3	5	4	1	8	4				8	2	1	2	2
								tubule79	6	6	16	2	8	6	3	2	3				2	3	0	4	5		tubule79	7	6	12	5	3	2	4	2	6				2	14	3	5	2
								tubule80	6	5	9	4	6	4	5	3	3				2	2	2	5	3		tubule80	6	3	4	4	3	3	2	3	4				8	3	4	1	1
								tubule81	5	4	12	3	2	3	2	15	3				1	2	7	2	0		tubule81	8	7	4	5	5	8	6	2	5				1	6	3	2	3
								tubule82	5	5	1	2	3	6	5	3	0				1	3	1	2	0		tubule82	6	16	5	3	4	7	8	6	3				10	4	3	2	4
								tubule83	10	7	1	6	4	10	2	1	2				4	4	6	2	2		tubule83	5	6	11	3	8	4	6	3	3				4	5	3	3	3
								tubule84	1	3	7	7	2	5	5	4	1				5	1	5	2	3		tubule84	7	6	7	3	8	10	3	3	4				6	10	5	4	0
								tubule85	5	3	6	7	5	2	6	0	7				2	2	4	2	3		tubule85	5	4	14	3	5	10	4	14	9				2	5	3	4	1
								tubule86	2	1	10	5	1	8	4	4	0				8	5	2	0	3		tubule86	4	5	5	3	2	4	5	5	3				14	5	3	0	8
								tubule87	8	2	13	7	0	3	6	0	1				6	5	2	4	3		tubule87	13	3	7	9	5	6	2	3	7				3	5	5	2	4
								tubule88	3	10	5	6	6	5	6	4	4				3	2	5	5	2		tubule88	5	3	3	7	3	8	1	4	1				5	5	2	3	6
								tubule89	13	5	7	3	6	5	2	1	9				2	7	2	1	3		tubule89	6	8	11	8	8	4	0	5	9				3	6	3	1	4
								tubule90	5	8	7	14	7	4	2	4	9				5	0	3	2	5		tubule90	7	12	14	7	0	4	3	0	6				4	2	3	2	5
								tubule91	5	3	4	4	7	6	0	6	4				3	6	3	0	0		tubule91	8	3	2	4	4	1	6	5	8				5	4	9	4	1
								tubule92	6	9	4	12	2	7	1	0	4				3	9	2	0	2		tubule92	6	7	4	15	4	12	5	1	5				3	3	5	3	6
								tubule93	6	3	14	13	1	7	6	2	7				5	3	3	3	5		tubule93	7	6	12	9	4	5	6	7	4				3	9	6	4	1
								tubule94	8	5	5	6	1	1	1	2	7				6	3	7	3	2		tubule94	2	4	6	6	5	11	2	7	12				2	2	2	7	2
								tubule95	10	6	8	4	3	9	2	4	1				2	4	1	2	3		tubule95	12	12	7	8	1	11	3	10	11				6	6	5	3	3
								tubule96	3	5	13	3	3	6	6	10	3				3	4	4	1	4		tubule96	7	7	6	9	4	10	3	6	11				5	10	1	3	6
								tubule97	6	16	3	0	2	1	4	8	4				0	1	9	9	0		tubule97	6	10	4	10	2	9	6	4	10				5	8	4	7	4
								tubule98	2	5	11	9	1	10	2	8	2				2	3	7	2	5		tubule98	6	5	5	1	7	8	15	3	2				3	4	1	5	4
								tubule99	16	5	3	5	5	11	3	4	2				3	1	2	1	3		tubule99	5	6	4	0	7	8	4	5	8				6	9	8	3	1
								tubule100	10	5	4	8	2	9	3	6	3				1	1	3	3	2		tubule100	1	5	4	8	0	10	4	7	4				4	3	7	3	6
								tubule101	5	7	8	2	2	8	3	2	2				2	3	4	3	1		tubule101	2	12	13	4	0	15	5	4	4				3	3	11	4	4
								tubule102	4	4	8	4	9	5	5	4	6				2	3	4	4	2		tubule102	8	3	9	6	1	12	3	6	6				2	4	7	4	4
								tubule103	7	5	12	6	3	6	4	7	4				8	5	0	3	5		tubule103	3	5	8	2	4	10	3	3	11				3	4	7	4	3
								tubule104	2	3	5	2	2	17	5	5	4				6	3	4	3	4		tubule104	4	5	5	12	3	17	9	3	12				2	5	4	6	5
								tubule105	5	7	8	0	8	8	11	3	3				5	4	3	5	3		tubule105	5	11	4	13	3	7	5	0	13				10	3	6	1	3
								tubule106	5	6	4	13	6	7	4	1	3				5	6	3	4	5		tubule106	5	17	3	7	3	6	7	2	10				6	5	3	3	1
								tubule107	8	5	3	0	5	5	14	2	4				4	2	3	4	3		tubule107	8	5	7	12	3	7	4	4	7				6	3	4	0	3
								tubule108	7	4	5	6	8	5	6	6	3				6	3	4	1	3		tubule108	5	5	7	13	5	7	3	5	14				5	9	3	16	3
								tubule109	6	5	13	12	7	5	3	1	2				4	2	4	2	4		tubule109	9	3	10	8	3	5	11	10	19				5	4	4	6	4
								tubule110	5	4	10	11	2	12	4	4	6				2	2	3	5	6		tubule110	11	6	8	6	3	7	5	7	8				2	4	5	3	6
								tubule111	5	4	4	0	12	9	2	5	1				2	2	3	3	3		tubule111	12	5	6	6	8	8	4	4	15				5	5	3	2	2
								tubule112	4	5	2	6	5	12	9	0	8				5	3	3	2	3		tubule112	5	4	3	5	7	7	7	8	16				7	3	6	2	2
								tubule113	7	4	4	13	5	7	6	5	3				4	3	3	6	4		tubule113	7	6	7	9	8	10	5	3	4				2	3	6	2	3
								tubule114	4	3	12	4	4	10	3	3	8				5	6	6	7	1		tubule114	14	4	4	7	6	10	5	5	5				6	8	8	3	6
								tubule115	4	4	4	7	2	10	3	3	4				3	3	6	4	1		tubule115	5	5	5	3	3	8	4	4	2				5	8	2	6	4
								tubule116	4	4	10	1	8	16	4	2	1				7	2	4	0	2		tubule116	13	5	5	4	6	8	4	4	7				4	4	6	8	5
								tubule117	6	4	15	7	12	16	3	5	2				5	3	6	1	2		tubule117	5	6	16	16	14	18	2	2	7				3	6	12	5	7
								tubule118	5	4	4	2	4	9	9	6	3				4	0	3	1	0		tubule118	5	3	9	15	6	1	4	6	2				11	6	4	3	3
								tubule119	5	6	8	6	1	7	5	2	7				6	14	3	16	5		tubule119	15	6	4	5	5	8	0	6	7				5	2	4	7	5
								tubule120	5	6		2	10	16	3	4	2				1	4	5	4	3		tubule120	12		7	10	4	6	5	2	11				8	7	7	4	1
								tubule121	8	8		2	4	2	7	10	7				3	4	7	7	7		tubule121	4		10	6	6	7	2	7	4				15	6	2	4	2
								tubule122	5	10		5	6	5	2	3	3				6	5	6	4	2		tubule122	6		6	9	16	4	4	4	7				4	7	5	8	1
								tubule123	8			6	13	6	2	11	3				4	3	5	5	1		tubule123	2		5	5	3	9	7	5	6				1	7	5	15	2
								tubule124	6			5	4	4	3	7	6				6	5	2	2	4		tubule124	6		7	8	1	7	3	6	7				3	5	8	5	4
								tubule125	5			3	8	3	6	7	4				9	7	6	2	5		tubule125			8	8	10	6	3	3	5				7	4	6	4	5
								tubule126	1			6	6	10	4	13	9				2	1	1	0	5		tubule126			4	6	5	12	8	4	7				8	7	3	2	3
								tubule127				7	9	8	5	10	3				2	6	3	11	2		tubule127			11	10	4	9	10	10	4				5	5	7	4	4
								tubule128				2	14	11	5	8	7				5	6	3	3	5		tubule128				3	2	11	5	4	7				7	3	4	5	1
								tubule129				3	11	4	3	5	11				1	4	6	4	4		tubule129				4	11	4	8	10	3				2	3	3	6	5
								tubule130				6	4	4	5	4	2				4	4	3	5	2		tubule130				7	15	6	5	3	11				3	3	7	5	6
								tubule131				2	11	6	5	4	12				3	5	6	4	9		tubule131				6	9	4	2	5	9				6	4	6	3	2
								tubule132				3	10	4	3	5	12				3	6	3	1	0		tubule132				8	2	4	6	1	9				7	3	4	1	5
								tubule133				4	5	5	6	1	9				6	6	4	4	3		tubule133				9	5	4	3	3	7				6	10	3	0	3
								tubule134				3	7	4	3	5	10				12	4	4	4	12		tubule134				4	12	4	6	4	11				5	2	5	4	3
								tubule135				5	4	10	5	3	8				3	5	4	2	3		tubule135				6	14	4	3	10					5	3	4	2	15
								tubule136				3	16	4	1	4	8				7	10	4	2	5		tubule136				5	4	5	3	8					5	4	5	5	2
								tubule137				3	9	3	3	3	4				4	4	4	0	2		tubule137				3	10	4	5	11					4	9	4	4	3
								tubule138				2	6	2	0	8	17				5	3	3	3	5		tubule138				2	11	5	4	9					3	4	3	1	5
								tubule139				8	10	1	12	12	9				4	2		4	3		tubule139				9	8	11	2	5					3	2	4	6	3
								tubule140				7	12	1	4	17	5				2	5		4	4		tubule140				7	9	9	4	12					6	3	3	5	4
								tubule141				5	6	5	2	10	12				4	3		2	5		tubule141				10	13	4	5	14					5	2	6	3	2
								tubule142				7	2	10	5		9				3	2		5	7		tubule142				9	9	1	10	10					3	4	9	4	5
								tubule143				3	4	12	5		19				2	2		4	2		tubule143				5	3	11	7	19					9	1	6	3	0
								tubule144				10	5	7	2		14				4	8		0	1		tubule144					5	6	8						6	3	5	6	0
								tubule145				8	5	4	2		19				5	3		3	3		tubule145					5	2	6						3	1	4	4	5
								tubule146				6	5	5	5		1				4	8		3	4		tubule146					5	15	9						6	3	5	6	4
								tubule147				4	4	10	1		6				2	5		3	1		tubule147					8	11	16						7	5	6	4	6
								tubule148					11	3	4		3				0	2		5	6		tubule148					7	7	12						6	4	6	1	5
								tubule149					5		7		2				7	4		2	0		tubule149					12	2	4						9	2	4	4	7
								tubule150					3		3		3				1	3		5	5		tubule150					6	7							3	2	6	4	2
								tubule151					4				7				6	1		1	2		tubule151						8							6	14	3	5	6
								tubule152					7								4	2		3	5		tubule152													2	8	3	0	7
								tubule153					6								8	4		5	6		tubule153													5	7	9	6	3
								tubule154					6								2	5		5	3		tubule154													4	4	4	8	3
								tubule155					4								4	5		3	3		tubule155													3	3	5	6	3
								tubule156					1									7		4	4		tubule156													6	5	5	3	5
								tubule157					5									5		4	2		tubule157														6	8	3	2
								tubule158					6									5		3	2		tubule158														4	2	1	6
								tubule159														5		6	1		tubule159															3	3	4
								tubule160																7	2		tubule160															3	8	2
								tubule161																0	7		tubule161															3	3	4
								tubule162																4	3		tubule162															4	4	2
								tubule163																1	3		tubule163	7.5	7.2437	7.29921	6.24476	5.94667	6.24503	5.30872	5.32168	5.56716	4.61538	4.53226	5.03947	4.92308	4.57595	4	7	4
								tubule164																1	2		tubule164															3	3	2
								tubule165																3	6		tubule165															6	5	3
								tubule166																7	4		tubule166															7	9	8
								tubule167																2	5		tubule167															4	4	4
								tubule168																6	2		tubule168																3	3
								tubule169																2	3		tubule169															4.64671	18	13
								tubule170																4	1		tubule170																5	4
								tubule171																3	1		tubule171																13	0
								tubule172																0	4		tubule172																3	3
								tubule173																13	3		tubule173																3	4
								tubule174																3	3		tubule174																6	2
								tubule175																1	3		tubule175																0	5
								tubule176																4	4		tubule176																3	2
								tubule177																4	5		tubule177																3	4
								tubule178																4	4		tubule178																3	2
								tubule179																2	2		tubule179																7	4
								tubule180																2	5		tubule180																8	1
								tubule181																2	3		tubule181																4	2
								tubule182																0	4		tubule182																4	2
								tubule183																4	12		tubule183																3	1
								tubule184																3	4		tubule184																2	4
								tubule185																4	3		tubule185																1	3
								tubule186																2	4		tubule186																2	3
								tubule187																3	3		tubule187																2	4
								tubule188																3	0		tubule188																4	0
								tubule189																4	3		tubule189																4	3
								tubule190																2	2		tubule190																0	1
								tubule191																2	5		tubule191																4	5
								tubule192																3	4		tubule192																2	0
								tubule193																3	0		tubule193																	5
								tubule194																7	3		tubule194
								tubule195																6	2		tubule195
								tubule196																	4		tubule196
								tubule197																	1		tubule197
								tubule198																	0		tubule198
								tubule199																	0		tubule199
								tubule200																	3		tubule200
								tubule201																	3		tubule201
								tubule202																	3		tubule202
								tubule203																	3		tubule203
								tubule204																	2		tubule204
								tubule205																	1		tubule205
								tubule206																	1		tubule206
								tubule207																	1		tubule207
								tubule208																			tubule208
								mean	6.24603	6.20492	7.10924	5.11565	5.57595	5.83784	4.7	4.69504	4.88079	4.08571	3.88406	4.07895	4.05161	3.87421	3.51449	3.05641	2.96135		mean	7.5	7.2437	7.29921	6.24476	5.94667	6.24503	5.30872	5.32168	5.56716	4.61538	4.53226	5.03947	4.92308	4.57595	4.64671	3.71875	3.35233
											6.52006			5.50981			4.75861			4.01624			3.81344		3.00888					7.34764			6.14549			5.39919			4.72904			4.71524		3.53554

## Sheet: Figure 3F
Figure 3F-source data:The number of GFRa1+ cells per 100mm seminiferous tubule in P6 testes.
		length of seminiferous tubule (mm)	Number of GFRa1+ cells	Number of GFRa1+ cells per mm seminiferous tubule	Number of GFRa1+ cells per 100mm seminiferous tubule			length of seminiferous tubule (mm)	Number of GFRa1+ cells	Number of GFRa1+ cells per mm seminiferous tubule	Number of GFRa1+ cells per 100mm seminiferous tubule			Number of GFRa1+ cells per 100mm seminiferous tubule
Control-1	1	730.16	53	0.0725868	7.25868	Srsf10cKO-1	1	711.16um	38	0.0394912	3.94912			Control	Srsf10-cKO
	2	838.25	76	0.0906651	9.06651		2	712.27	50	0.0701981	7.01981			8.06766	5.41493
	3	764.19	66	0.086366	8.6366		3	934.28	33	0.0353213	3.53213			8.3851	6.38202
	4	917.14	82	0.0894084	8.94084		4	596.66	40	0.0670399	6.70399			8.43284	6.28499
	5	936.34	69	0.0736912	7.36912		5	835.62	49	0.0586391	5.86391			9.52075	7.04296
	6	1020.63	96	0.0940596	9.40596		6	890.04	49	0.0550537	5.50537			8.93336	6.2024
	7	700.56	50	0.0713715	7.13715		7	1154.08	62	0.0537224	5.37224			9.86353	6.4018
	8	728.47	49	0.0672643	6.72643		8	1070.36	68	0.06353	6.353
	mean				8.06766		9	1082.34	48	0.0443484	4.43484
							mean				5.41493		mean	8.86721	6.28818
Control-2	1	752.49	71	0.0943534	9.43534								T-test	4.48474e-05
	2	751.86	53	0.0704918	7.04918	Srsf10cKO-2	1	670.01	49	0.0731332	7.31332
	3	906.94	85	0.0937217	9.37217		2	728.73	54	0.0741015	7.41015
	4	828.11	58	0.070039	7.0039		3	729.9	44	0.0602822	6.02822
	5	718.76	58	0.0806945	8.06945		4	706.79	48	0.0679127	6.79127
	6	710.13	71	0.0999817	9.99817		5	855.54	75	0.0876639	8.76639
	7	778.02	66	0.0848307	8.48307		6	764.81	37	0.048378	4.8378
	8	951.82	73	0.0766952	7.66952		7	709.44	35	0.0493347	4.93347
	mean				8.3851		8	880.69	65	0.0738058	7.38058
							9	715.98	45	0.0628509	6.28509
Control-3	1	939.71	79	0.0840685	8.40685		10	702.27	32	0.0455665	4.55665
	2	879.35	84	0.0955251	9.55251		11	726.66	47	0.0646795	6.46795
	3	866.41	44	0.0507843	5.07843		12	911.69	53	0.0581338	5.81338
	4	859.69	84	0.0977096	9.77096		mean				6.38202
	5	883.44	111	0.125645	12.5645
	6	833.24	69	0.0828093	8.28093	Srsf10cKO-3	1	1846.31	141	0.0763685	7.63685
	7	810.57	51	0.0629187	6.29187		2	962.24	64	0.0665115	6.65115
	8	701.92	56	0.0797812	7.97812		3	730.8	45	0.0615764	6.15764
	9	651.22	58	0.0890636	8.90636		4	1212.34	94	0.077536	7.7536
	10	906.92	68	0.074979	7.4979		5	505.39	33	0.0652961	6.52961
	mean				8.43284		6	820.03	45	0.054876	5.4876
							7	839.35	35	0.0416989	4.16989
Control-4	1	794.97	87	0.109438	10.9438		8	634.49	40	0.0630428	6.30428
	2	922.81	79	0.0856081	8.56081		9	1692.29	104	0.0614552	6.14552
	3	962.1	99	0.1029	10.29		10	848.05	51	0.060138	6.0138
	4	784.52	65	0.0828532	8.28532		mean				6.28499
	5	995.23	121	0.12158	12.158
	6	847.55	67	0.0790514	7.90514	Srsf10cKO-4	1	842.62	65	0.0771403	7.71403
	7	826.85	65	0.0786116	7.86116		2	596.43	51	0.0855088	8.55088
	8	994.14	110	0.110648	11.0648		3	1042.58	74	0.0709778	7.09778
	9	894.63	90	0.1006	10.06		4	709.35	54	0.076126	7.6126
	10	891.26	72	0.0807845	8.07845		5	827.01	62	0.0749689	7.49689
	mean				9.52075		6	905.13	59	0.065184	6.5184
							7	712.36	57	0.0800157	8.00157
Control-5	1	747.48	69	0.0923102	9.23102		8	794.33	49	0.0616872	6.16872
	2	759.21	70	0.0922011	9.22011		9	736.72	39	0.0529373	5.29373
	3	795.53	83	0.104333	10.4333		10	929.65	59	0.0634647	6.34647
	4	892.2	78	0.0874243	8.74243		11	824.41	55	0.0667144	6.67144
	5	888.91	73	0.082123	8.2123		mean				7.04296
	6	852.33	51	0.059836	5.9836
	7	735.25	86	0.116967	11.6967	Srsf10cKO-5	1	789.93	53	0.0670946	6.70946
	8	596.56	58	0.0972241	9.72241		2	729.98	50	0.068495	6.8495
	9	750.79	73	0.0972309	9.72309		3	656.48	26	0.0396052	3.96052
	10	565.27	36	0.0636864	6.36864		4	851.4	32	0.0375852	3.75852
	mean				8.93336		5	819.49	60	0.0732163	7.32163
							6	780.49	44	0.0563748	5.63748
Control-6	1	740.9	76	0.102578	10.2578		7	716.99	39	0.0543941	5.43941
	2	717.8	76	0.105879	10.5879		8	834.94	52	0.0622799	6.22799
	3	708.72	75	0.105825	10.5825		9	742.85	42	0.056539	5.6539
	4	705.32	77	0.10917	10.917		10	772.02	45	0.0582886	5.82886
	5	966.54	97	0.100358	10.0358		11	669	38	0.0568012	5.68012
	6	711.88	80	0.112378	11.2378		12	824.54	61	0.0739806	7.39806
	7	900.15	97	0.10776	10.776		13	707.78	56	0.0791206	7.91206
	8	663.63	53	0.0798638	7.98638		14	707.03	41	0.0579891	5.79891
	9	704.16	45	0.0639059	6.39059		15	1273.26	77	0.0604747	6.04747
	mean				9.86353		16	580.96	50	0.0860644	8.60644
							17	1068.11	84	0.0786436	7.86436
							18	970	48	0.0494845	4.94845
							mean				6.2024
						Srsf10cKO-6	1	733.59	43	0.0586158	5.86158
							2	847.51	40	0.0471971	4.71971
							3	996.59	56	0.0561916	5.61916
							4	689.03	50	0.0725658	7.25658
							5	992.98	58	0.05841	5.841
							6	823.11	43	0.0522409	5.22409
							7	601.72	38	0.0631523	6.31523
							8	932.53	56	0.0600517	6.00517
							9	942.55	82	0.086998	8.6998
							10	901.17	51	0.0565931	5.65931
							11	738.55	50	0.0677002	6.77002
							12	826.4	42	0.0508228	5.08228
							13	807.4	58	0.0718355	7.18355
							14	655.63	61	0.0930403	9.30403
							15	711.78	43	0.0604119	6.04119
							16	774.16	53	0.0684613	6.84613
							mean				6.4018

## Sheet: Figure 3G
Figure 3G-source data: The number of MVH+ cells per tubule cross section in P3 testes.
									The detailed information of Figure 3G
									MVH+ cells/tubule
		MVH+ cells/tubule	mean			MVH+ cells/tubule	mean			Control 1-1	Control 1-2	Control 1-3	Control 2-1	Control 2-2	Control 2-3	Control 3-1	Control 3-2	Control 4-1	Control 4-2	Srsf10cKO1-1	Srsf10cKO1-2	Srsf10cKO1-3	Srsf10cKO2-1	Srsf10cKO2-2	Srsf10cKO2-3	Srsf10cKO3-1	Srsf10cKO3-2	Srsf10cKO3-3	Srsf10cKO4-1	Srsf10cKO4-2	Srsf10cKO5-1	Srsf10cKO5-2	Srsf10cKO6-1	Srsf10cKO6-2	Srsf10cKO6-3	Srsf10cKO7-1	Srsf10cKO7-2
	Control 1-1	4.23881			Srsf10cKO1-1	1.98305			tubule-1	4	3	2	2	1	3	2	7	1	4	1	2	1	2	1	2	1	2	6	4	2	2	2	2	2	3	8	5
	Control 1-2	4.22727			Srsf10cKO1-2	2.11842			tubule-2	3	3	5	2	1	4	1	1	3	2	1	2	1	1	1	2	3	4	2	1	5	2	1	0	3	1	8	1
	Control 1-3	3.63934	4.03514		Srsf10cKO1-3	1.94203	2.0145		tubule-3	1	7	3	1	4	3	1	1	1	3	2	2	2	4	5	1	2	5	5	3	2	4	2	0	0	0	7	0
									tubule-4	3	3	3	1	3	1	2	2	0	0	2	2	2	1	2	5	1	3	3	3	2	0	5	1	7	4	4	4
	Control 2-1	2.30667			Srsf10cKO2-1	1.95699			tubule-5	3	2	3	2	3	4	1	3	1	0	2	2	2	2	3	2	2	2	4	3	4	1	1	0	4	0	0	5
	Control 2-2	2.63934			Srsf10cKO2-2	2			tubule-6	4	6	1	1	3	2	1	0	3	0	2	2	1	4	1	1	2	1	2	3	2	2	2	0	0	4	1	8
	Control 2-3	2.66102	2.53568		Srsf10cKO2-3	2.15663	2.03787		tubule-7	5	1	1	4	2	2	0	1	3	0	1	4	2	2	3	1	3	4	3	2	3	0	1	6	3	3	7	1
									tubule-8	4	4	2	1	3	3	4	2	4	3	1	2	1	1	2	1	3	1	5	12	4	0	4	2	10	6	0	0
	Control 3-1	3.43056			Srsf10cKO3-1	3.20253			tubule-9	6	3	10	2	2	2	4	2	0	4	2	2	4	1	2	2	6	2	2	4	7	3	2	1	8	6	4	0
	Control 3-2	3.23077	3.33066		Srsf10cKO3-2	2.72			tubule-10	1	4	2	1	3	3	4	4	0	1	1	3	2	2	3	2	5	5	3	0	4	1	5	3	4	3	0	2
					Srsf10cKO3-3	3.22078	3.04777		tubule-11	4	6	3	3	3	3	6	0	4	0	1	1	1	2	1	1	7	1	5	1	11	2	6	2	2	0	0	2
	Control 4-1	2.0122							tubule-12	4	5	5	4	4	2	0	3	3	2	2	1	1	1	1	1	4	2	3	2	0	5	2	2	2	1	1	2
	Control 4-2	2	2.0061		Srsf10cKO4-1	3.25641			tubule-13	3	5	3	1	4	4	3	2	3	1	1	1	2	2	1	1	6	3	6	1	4	2	2	7	2	3	1	8
					Srsf10cKO4-2	3.59091	3.42366		tubule-14	3	3	2	3	1	2	10	8	0	0	2	2	1	1	1	2	6	1	2	5	1	1	0	8	3	0	2	1
									tubule-15	4	1	2	1	3	1	4	2	3	4	5	2	1	1	2	1	5	2	2	2	1	3	3	2	2	1	0	3
					Srsf10cKO5-1	3.13699			tubule-16	4	2	5	4	3	3	2	5	1	4	2	1	1	4	3	1	1	3	5	3	12	2	4	3	3	3	3	1
					Srsf10cKO5-2	3.53947	3.33823		tubule-17	5	5	3	4	3	2	7	16	4	3	4	1	2	1	2	1	6	3	2	4	2	3	7	3	2	2	0	2
									tubule-18	1	6	2	2	3	3	3	10	5	1	3	3	2	1	1	6	3	2	2	1	5	2	1	4	3	2	2	1
					Srsf10cKO6-1	2.45745			tubule-19	2	3	2	2	1	2	1	2	0	1	4	3	1	2	1	3	2	4	6	3	3	1	3	5	3	3	4	2
					Srsf10cKO6-2	2.67416			tubule-20	6	3	5	3	3	2	6	5	1	3	1	1	1	3	3	3	1	1	3	3	4	6	4	4	1	5	4	3
					Srsf10cKO6-3	2.64045	2.59068		tubule-21	4	4	2	3	1	1	5	5	4	4	1	2	1	2	1	2	4	4	5	4	9	2	6	2	5	1	0	4
									tubule-22	11	3	5	2	1	5	0	1	0	4	2	1	1	1	2	3	2	5	10	6	4	4	5	0	4	5	0	4
					Srsf10cKO7-1	1.39362			tubule-23	7	6	4	1	2	3	5	1	5	4	2	2	1	3	2	1	3	3	6	4	2	2	2	1	2	2	2	8
					Srsf10cKO7-2	1.40449	1.39906		tubule-24	3	2	2	2	3	1	4	1	3	2	2	2	1	1	2	2	3	3	1	1	6	2	1	1	7	3	2	1
									tubule-25	4	2	1	5	6	3	3	7	1	0	2	2	1	3	2	3	3	3	1	6	3	1	3	4	1	2	1	4
									tubule-26	5	4	3	3	2	3	3	3	0	0	4	1	1	1	2	1	3	2	1	4	2	2	2	3	0	2	1	1
		MVH+cells/tubule							tubule-27	3	1	2	1	2	2	3	1	0	1	1	2	2	1	1	1	5	8	2	1	3	2	1	1	0	2	0	0
		Control	Srsf10-cKO						tubule-28	4	5	4	1	2	2	6	4	5	0	1	2	3	1	2	1	4	1	4	1	2	8	1	3	1	2	1	1
		4.03514	2.0145						tubule-29	4	5	3	1	3	2	3	4	1	10	6	1	5	1	2	1	3	2	1	2	3	3	0	3	2	8	2	3
		2.53568	2.03787						tubule-30	5	1	3	3	2	2	7	0	4	1	2	5	6	7	1	3	3	1	1	9	3	6	0	4	2	2	1	6
		3.33066	3.04777						tubule-31	1	3	2	4	2	1	5	7	1	0	1	1	1	2	2	1	1	1	10	6	2	5	0	3	2	0	3	0
		2.0061	3.42366						tubule-32	5	2	9	4	2	2	4	1	3	0	1	5	2	3	1	1	2	4	2	4	2	6	4	2	2	5	0	1
			3.33823						tubule-33	3	6	4	2	4	2	6	2	4	1	1	1	3	2	3	1	2	2	6	2	2	1	2	3	1	5	0	0
			2.59068						tubule-34	4	6	4	2	1	5	2	3	1	3	1	2	2	1	4	1	1	1	1	3	9	1	1	1	3	1	1	0
			1.39906						tubule-35	4	4	2	3	4	4	1	1	2	0	1	1	1	4	1	4	1	3	2	3	4	2	2	4	2	1	0	0
	mean	2.97689	2.63095						tubule-36	3	6	7	2	4	4	3	2	1	3	1	2	1	1	1	2	5	1	2	3	2	0	5	4	1	2	0	1
	T-test	0.454707							tubule-37	2	6	4	2	2	5	1	13	0	2	1	3	3	1	5	1	3	3	3	3	7	8	4	0	2	0	0	0
									tubule-38	6	5	3	2	3	7	2	0	2	1	4	2	4	3	2	1	2	1	1	2	5	5	0	2	3	3	0	0
									tubule-39	3	8	3	2	3	7	5	11	4	0	3	2	4	3	2	1	3	2	1	3	1	3	3	2	4	1	0	1
		All mounted tubules							tubule-40	4	3	4	1	5	2	5	5	4	2	1	2	2	3	1	5	4	1	1		1	3	2	2	0	12	0	0
		Control	Srsf10-cKO						tubule-41	1	5	2	1	2	2	4	2	10	0	1	1	2	1	2	2	3	6	2		2	5	2	0	2	0	0	0
		67	59						tubule-42	2	5	5	1	1	1	3	2	1	1	1	2	2	1	1	2	2	4	4		3	2	0	0	2	2	1	0
		66	76						tubule-43	6	8	5	1	2	4	1	4	0	2	2	6	2	1	2	4	3	1	2		0	6	3	2	4	2	1	0
		61	70						tubule-44	7	9	6	2	2	1	2	1	0	1	1	2	1	1	4	4	4	1	2		3	3	3	1	4	12	0	0
		75	93						tubule-45	9	2	2	2	4	4	4	3	4	1	1	2	1	1	3	4	5	3	4			2	5	1	1	5	0	0
		61	93						tubule-46	5	6	4	2	2	3	2	5	3	2	2	1	3	1	2	4	7	2	3			4	5	5	1	0	0	0
		60	84						tubule-47	4	3	3	2	2	4	4	11	1	0	3	3	2	1	3	1	3	4	3			1	9	2	1	5	0	0
		72	79						tubule-48	4	6	3	4	4	3	8	2	1	0	3	2	2	2	4	1	3	2	6			5	7	3	4	0	0	0
		79	75						tubule-49	3	5	7	1	2	3	13	4	1	2	3	1	1	1	1	1	4	2	1			5	1	3	6	2	0	0
		82	78						tubule-50	2	5	2	1	4	1	4	2	1	0	1	2	2	5	2	3	3	2	1			7	3	4	2	0	0	1
		88	39						tubule-51	2	2	4	2	5	1	0	0	1	3	1	5	2	3	3	2	5	3	1			2	5	2	12	3	0	1
			45						tubule-52	1	4	2	3	2	2	0	0	1	1	3	1	5	7	3	1	2	3	2			1	6	20	4	0	0	0
			73						tubule-53	7	3	2	4	2	1	5	3	1	2	3	1	4	3	3	4	4	1	1			1	1	6	0	7	0	0
			77						tubule-54	3	1	3	2	1	2	7	5	3	0	4	1	1	1	2	2	1	4	1			4	4	3	0	1	2	0
			94						tubule-55	4	5	5	1	3	2	3	2	3	0	3	1	2	1	1	1	1	3	1			2	2	4	0	0	0	1
			89						tubule-56	10	9	3	4	4	3	3	3	3	2	2	1	2	2	3	2	1	2	2			0	12	1	1	3	1	0
			90						tubule-57	5	3	4	4	1	2	3	5	1	1	2	2	2	4	4	1	2	3	10			8	1	5	5	5	1	0
			94						tubule-58	9	1	6	1	4	2	1	5	2	1	2	3	1	2	1	2	4	3	2			1	8	4	0	7	0	0
			90						tubule-59	4	2	7	3	2	2	5	2	3	0	1	2	1	1	3	2	3	1	1			2	3	6	0	4	1	0
									tubule-60	5	3	4	1	3		1	2	4	8		1	1	1	2	2	3	5	2			2	6	0	17	6	2	2
		711	1398						tubule-61	5	4	8	4	2		3	2	2	1		2	1	1	1	6	4	2	10			5	2	3	1	0	0	0
									tubule-62	5	10		1			4	7	1	3		3	2	1	3	2	5	3	7			7	3	5	2	10	2	3
									tubule-63	4	7		5			3	2	1	3		2	1	1	1	1	3	2	4			2	5	2	7	6	0	0
									tubule-64	4	4		4			0	2	0	3		4	2	1	1	3	3	3	1			3	4	0	6	2	2	0
									tubule-65	9	7		4			2	3	4	1		3	2	2	2	1	4	4	1			1	14	3	3	3	2	0
									tubule-66	6	3		3			4	4	1	1		3	1	2	2	3	3	3	2			6	6	4	1	7	2	0
									tubule-67	3			1			3	1	2	6		2	4	2	3	3	4	2	4			0	9	1	2	4	5	0
									tubule-68							7	2	6	2		4	2	1	1	2	3	2	2			1	4	3	4	1	4	1
									tubule-69				3			4	1	1	6		3	4	1	1	3	2	6	6			19	0	1	4	3	1	0
									tubule-70				3			4	1	1	0		4		1	2	4	7	2	1			6	5	2	4	0	1	1
									tubule-71				2			3	2	1	3		1		1	4	4	1	4	6			4	7	3	4	3	3	2
									tubule-72				2			2	2	1	0		1		6	3	3	2	5	6			2	9	0	2	4	0	1
									tubule-73				6				2	1	4		1		3	1	1	2	2	2			2	7	6	5	3	0	1
									tubule-74				1				3	1	3		1		2	1	2	1	3	2				2	3	3	1	0	2
									tubule-75				1				3	1	10		3		2	1	5	2	4	2				1	0	1	1	3	2
									tubule-76				1				1	2	3		4		1	2	3	5		4				4	0	1	3	0	1
									tubule-77								2	0	3				1	2	1	5		5					3	1	1	4	2
									tubule-78								1	2	2				1	1	1	4							2	3	1	2	0
									tubule-79									0	0				4	2	1	4							0	2	3	1	1
									tubule-80									3	0				3	5	2								0	0	1	2	2
									tubule-81									5	3				2	1	2								3	0	3	3	1
									tubule-82									0	3				2	1	1								2	0	0	3	3
									tubule-83										1				4	1	5								0	0	0	3	2
									tubule-84										3				1	1									4	0	0	0	3
									tubule-85										4				1	3									0	0	0	0	4
									tubule-86										0				2	1									0	1	0	1	1
									tubule-87										5				1	2									2	0	0	1	0
									tubule-88														1	3									1	5	1	0	0
									tubule-89														1	1									2	2	1	1	1
									tubule-90														3	1									0			4
									tubule-91														1	1									0			0
									tubule-92														2	2									1			0
									tubule-93														2	2									1			2
																																	2			0
									mean	4.23881	4.22727	3.63934	2.30667	2.63934	2.66102	3.43056	3.23077	2.0122	2	1.98305	2.11842	1.94203	1.95699	2	2.15663	3.20253	2.72	3.22078	3.25641	3.59091	3.13699	3.53947	2.45745	2.67416	2.64045	1.39362	1.40449
									mean			4.03514			2.53568		3.33066		2.0061			2.0145			2.03787			3.04777		3.42366		3.33823			2.59068		1.39906

## Sheet: Figure 3H
Figure 3H-source data: Quantification of PLZF-positive cells per tubule cross-section in control and Srsf10-cKO testes at P3, P6, P8 and P12.
	P3				P6				P8				P12
		MVH+cells/tubule				PLZF+ cells/tubule				PLZF+ cells/tubule				PLZF+ cells/tubule
		Control	Srsf10-cKO			Control	Srsf10-cKO			Control	Srsf10-cKO			Control	Srsf10-cKO
		4.03514	2.0145			6.52006	4.01624			7.87797	4.79499			10.3851	5.21955
		2.53568	2.03787			5.50981	3.81344			8.30529	3.83367			9.3152	6.2078
		3.33066	3.04777			4.75861	3.00888			7.66667	4.72737			10.3128	4.26492
		2.0061	3.42366		mean	5.59616	3.61285			9.61988	4.07233				5.05216
			3.33823		T-test	0.0391678				9.0634	6.62623				5.71428
			2.59068							9.19247	3.09258		mean	10.0044	5.23076
			1.39906						mean	8.62094	4.52453		T-test	0.000154083
	mean	2.97689	2.63095						T-test	3.82734e-05
	T-test	0.454707
P12
	PLZF+ cells/tubule	mean		PLZF+ cells/tubule	mean
Control 1-1	10.0769		Srsf10cKO1-1	4.84615
Control 1-2	8.47826		Srsf10cKO1-2	4.375
Control 1-3	12.6	10.3851	Srsf10cKO1-3	6.4375	5.21955
Control 2-1	9.61905		Srsf10cKO2-1	6.7
Control 2-2	9.01887		Srsf10cKO2-2	6.375
Control 2-3	9.30769	9.3152	Srsf10cKO2-3	5.54839	6.2078
Control 3-1	9.71111		Srsf10cKO3-1	3.50943
Control 3-2	10.9474		Srsf10cKO3-2	5.19231
Control 3-3	10.28	10.3128	Srsf10cKO3-3	4.09302	4.26492
			Srsf10cKO4-1	4.50943
			Srsf10cKO4-2	5.70588
			Srsf10cKO4-3	4.94118	5.05216
			Srsf10cKO5-1	6.32653
			Srsf10cKO5-2	4.7963
			Srsf10cKO5-3	6.02	5.71428
The detailed information of P12
PLZF+ cells/tubule
	Control 1-1	Control 1-2	Control 1-3	Control 2-1	Control 2-2	Control 2-3	Control 3-1	Control 3-2	Control 1-4	Srsf10cKO1-1	Srsf10cKO1-2	Srsf10cKO1-3	Srsf10cKO2-1	Srsf10cKO2-2	Srsf10cKO2-3	Srsf10cKO3-1	Srsf10cKO3-2	Srsf10cKO3-3	Srsf10cKO4-1	Srsf10cKO4-2	Srsf10cKO4-3	Srsf10cKO5-1	Srsf10cKO5-2	Srsf10cKO5-3
tubule-1	14	9	4	4	12	11	8	10	19	6	3	6	6	6	6	5	6	5	9	4	14	5	7	6
tubule-2	5	9	6	10	15	10	5	11	18	2	6	7	13	10	0	2	10	3	8	1	6	9	5	9
tubule-3	7	7	3	16	6	10	5	17	25	4	3	6	3	8	6	4	6	1	3	4	10	4	9	3
tubule-4	11	12	6	16	5	12	3	12	13	4	2	3	16	3	3	6	8	1	7	2	5	7	6	3
tubule-5	12	12	10	7	7	15	7	15	15	5	4	3	2	9	4	0	4	2	3	8	2	11	10	9
tubule-6	12	13	7	10	9	10	9	8	2	9	3	4	6	7	3	4	5	5	4	5	10	4	5	6
tubule-7	13	12	8	7	10	13	13	13	6	6	6	3	5	9	3	1	0	0	6	5	5	2	4	5
tubule-8	11	4	7	5	12	12	12	13	17	1	3	8	8	1	10	4	5	0	7	3	2	0	5	7
tubule-9	5	3	7	20	6	7	6	13	5	12	5	9	11	3	8	5	1	2	2	5	2	9	2	3
tubule-10	13	10	9	9	11	8	9	13	8	5	4	6	3	10	2	1	13	4	9	2	4	6	1	7
tubule-11	5	10	9	10	11	11	11	20	8	0	4	8	0	7	4	2	10	3	1	4	1	8	9	5
tubule-12	7	8	7	4	5	8	6	10	8	10	11	8	1	6	8	1	13	5	6	2	4	10	3	6
tubule-13	16	6	10	15	16	5	8	9	11	7	1	4	6	5	6	2	0	3	5	8	6	9	1	8
tubule-14		6	7	14	13	5	7	10	10	1	1	11	7	3	2	1	2	0	5	1	3	10	6	2
tubule-15		8	4	7	1	10	18	5	6	2	1	7	7	10	3	2	0	5	5	3	13	6	2	4
tubule-16		16	12	12	7	12	11	11	6	11	8	6	15	5	8	3	9	3	1	2	7	6	2	0
tubule-17		7	16	13	8	15	9	8	9	7	8	9	6		4	3	3	4	8	6	1	1	4	0
tubule-18		7	6	12	10	11	6	5	11	3	4	4	7		9	1	7	14	7	6	1	8	7	7
tubule-19		6	10	5	10	10	10	22	7	9	6	4	8		3	3	6	3	2	7	2	11	5	6
tubule-20		8	104	10	6	12	14	13	6	0	3	8	8		4	2	6	6	7	2	3	1	2	2
tubule-21		7		14	19	9	7	2	10	1	3	6	9		9	4	1	0	6	10	11	11	5	3
tubule-22		9		7	12	10	10	7	14	2	3	12	1		4	5	11	0	5	10	2	1	2	5
tubule-23		6		13	8	9	6	11	9	7	2	8	17		7	3	6	3	7	5	2	3	6	5
tubule-24				12	8	5	11	6	6	8	2	1	3		8	5	3	5	7	5	9	12	1	9
tubule-25				6	7	12	14	7	8	6	4	3	5		3	2	0	4	6	6	4	9	7	7
tubule-26				10	12	5	8	11		2	5	11	15		6	0	0	3	4	2	12	13	3	8
tubule-27				14	9	9	8	7		4	3	4	1		5	4		13	4	7	3	6	0	5
tubule-28				10	6	10	10	10		7	2	9	2		11	3		6	2	21	10	8	3	9
tubule-29				9	15	8	5	18		4	6	3	3		2	5		0	2	6	5	8	4	10
tubule-30				17	9	13	9	8		3	4	8	7		9	0		7	4	15	4	2	4	5
tubule-31				9	10	6	7	8		6	4	7			12	0		6	1	7	9	4	3	7
tubule-32				6	9	5	11	8		5	6	10				3		3	3	6	4	5	5	13
tubule-33				6	13	10	2	5		2	5					6		13	5	8	6	8	5	6
tubule-34				6	11	6	16	10		3	5					6		10	5	6	7	8	8	10
tubule-35				3	15	6	9	23		4	4					4		2	3		2	5	9	4
tubule-36				8	8	3	5	11		7	7					1		3	6		1	4	10	5
tubule-37				6	7	10	8	20		8	8					2		10	10		2	6	9	8
tubule-38				7	5	11	10	6		3	5					4		8	6		2	4	8	10
tubule-39				7	12	9	12			3	3					2		3	0		5	15	1	7
tubule-40				7	10		22				2					4		4	2		6	5	7	12
tubule-41				10	6		13				3					1		1	10		8	3	4	8
tubule-42				11	7		14				2					4		3	3		3	5	9	4
tubule-43					6		14				4					3		0	2		6	6	8	0
tubule-44					2		16				6					4			2		3	6	4	9
tubule-45					3		13				8					5			3		0	9	6	7
tubule-46					4						4					7			1		3	1	4	6
tubule-47					10						5					9			1		7	1	1	5
tubule-48					8						9					6			8		7	4	5	3
tubule-49					17											9			9		5	11	3	5
tubule-50					4											4			3		1		8	8
tubule-51					9											7			3		2		2
tubule-52					13											7			0				2
tubule-53					4											5			1				7
tubule-54																							1
tubule-55
tubule-56
mean	10.0769	8.47826	12.6	9.61905	9.01887	9.30769	9.71111	10.9474	10.28	4.84615	4.375	6.4375	6.7	6.375	5.54839	3.50943	5.19231	4.09302	4.50943	5.70588	4.94118	6.32653	4.7963	6.02
mean			10.3851			9.3152			10.3128			5.21955			6.2078			4.26492			5.05216			5.71428
