# Supplementary material for: SRSF10 is essential for progenitor spermatogonia expansion by regulating alternative splicing
Source: eLife journal article supplement (doi:10.7554/elife.78211), 2022-10-24
Supplement: fig3-figsupp1-data1 [file Figure 3- figure supplement 1-source data 1.xlsx]

## Sheet: Figure3 S2B
Figure 3- figure supplement 1-source data 1					Figure 3- figure supplement1-source data 1
														All mounted tubules
P12								P12						Control	Srsf10-cKO
	PLZF+ cells/tubule	mean		PLZF+ cells/tubule	mean				PLZF+ cells/tubule					13	39
Control 1-1	10.0769		Srsf10cKO1-1	4.84615					Control	Srsf10-cKO				23	48
Control 1-2	8.47826		Srsf10cKO1-2	4.375					10.3851	5.21955				20	32
Control 1-3	12.6	10.3851	Srsf10cKO1-3	6.4375	5.21955				9.3152	6.2078				42	29
Control 2-1	9.61905		Srsf10cKO2-1	6.7					10.3128	4.26492				53	16
Control 2-2	9.01887		Srsf10cKO2-2	6.375						5.05216				39	31
Control 2-3	9.30769	9.3152	Srsf10cKO2-3	5.54839	6.2078					5.71428				45	53
Control 3-1	9.71111		Srsf10cKO3-1	3.50943				mean	10.0044	5.23076				38	26
Control 3-2	10.9474		Srsf10cKO3-2	5.19231				T-test	0.000154083					24	43
Control 3-3	10.28	10.3128	Srsf10cKO3-3	4.09302	4.26492										53
			Srsf10cKO4-1	4.50943											34
			Srsf10cKO4-2	5.70588											51
			Srsf10cKO4-3	4.94118	5.05216										49
			Srsf10cKO5-1	6.32653											54
			Srsf10cKO5-2	4.7963											50
			Srsf10cKO5-3	6.02	5.71428
														297	608
The detailed information of Figure S2B
PLZF+ cells/tubule
	Control 1-1	Control 1-2	Control 1-3	Control 2-1	Control 2-2	Control 2-3	Control 3-1	Control 3-2	Control 1-4	Srsf10cKO1-1	Srsf10cKO1-2	Srsf10cKO1-3	Srsf10cKO2-1	Srsf10cKO2-2	Srsf10cKO2-3	Srsf10cKO3-1	Srsf10cKO3-2	Srsf10cKO3-3	Srsf10cKO4-1	Srsf10cKO4-2	Srsf10cKO4-3	Srsf10cKO5-1	Srsf10cKO5-2	Srsf10cKO5-3
tubule-1	14	9	4	4	12	11	8	10	19	6	3	6	6	6	6	5	6	5	9	4	14	5	7	6
tubule-2	5	9	6	10	15	10	5	11	18	2	6	7	13	10	0	2	10	3	8	1	6	9	5	9
tubule-3	7	7	3	16	6	10	5	17	25	4	3	6	3	8	6	4	6	1	3	4	10	4	9	3
tubule-4	11	12	6	16	5	12	3	12	13	4	2	3	16	3	3	6	8	1	7	2	5	7	6	3
tubule-5	12	12	10	7	7	15	7	15	15	5	4	3	2	9	4	0	4	2	3	8	2	11	10	9
tubule-6	12	13	7	10	9	10	9	8	2	9	3	4	6	7	3	4	5	5	4	5	10	4	5	6
tubule-7	13	12	8	7	10	13	13	13	6	6	6	3	5	9	3	1	0	0	6	5	5	2	4	5
tubule-8	11	4	7	5	12	12	12	13	17	1	3	8	8	1	10	4	5	0	7	3	2	0	5	7
tubule-9	5	3	7	20	6	7	6	13	5	12	5	9	11	3	8	5	1	2	2	5	2	9	2	3
tubule-10	13	10	9	9	11	8	9	13	8	5	4	6	3	10	2	1	13	4	9	2	4	6	1	7
tubule-11	5	10	9	10	11	11	11	20	8	0	4	8	0	7	4	2	10	3	1	4	1	8	9	5
tubule-12	7	8	7	4	5	8	6	10	8	10	11	8	1	6	8	1	13	5	6	2	4	10	3	6
tubule-13	16	6	10	15	16	5	8	9	11	7	1	4	6	5	6	2	0	3	5	8	6	9	1	8
tubule-14		6	7	14	13	5	7	10	10	1	1	11	7	3	2	1	2	0	5	1	3	10	6	2
tubule-15		8	4	7	1	10	18	5	6	2	1	7	7	10	3	2	0	5	5	3	13	6	2	4
tubule-16		16	12	12	7	12	11	11	6	11	8	6	15	5	8	3	9	3	1	2	7	6	2	0
tubule-17		7	16	13	8	15	9	8	9	7	8	9	6		4	3	3	4	8	6	1	1	4	0
tubule-18		7	6	12	10	11	6	5	11	3	4	4	7		9	1	7	14	7	6	1	8	7	7
tubule-19		6	10	5	10	10	10	22	7	9	6	4	8		3	3	6	3	2	7	2	11	5	6
tubule-20		8	104	10	6	12	14	13	6	0	3	8	8		4	2	6	6	7	2	3	1	2	2
tubule-21		7		14	19	9	7	2	10	1	3	6	9		9	4	1	0	6	10	11	11	5	3
tubule-22		9		7	12	10	10	7	14	2	3	12	1		4	5	11	0	5	10	2	1	2	5
tubule-23		6		13	8	9	6	11	9	7	2	8	17		7	3	6	3	7	5	2	3	6	5
tubule-24				12	8	5	11	6	6	8	2	1	3		8	5	3	5	7	5	9	12	1	9
tubule-25				6	7	12	14	7	8	6	4	3	5		3	2	0	4	6	6	4	9	7	7
tubule-26				10	12	5	8	11		2	5	11	15		6	0	0	3	4	2	12	13	3	8
tubule-27				14	9	9	8	7		4	3	4	1		5	4		13	4	7	3	6	0	5
tubule-28				10	6	10	10	10		7	2	9	2		11	3		6	2	21	10	8	3	9
tubule-29				9	15	8	5	18		4	6	3	3		2	5		0	2	6	5	8	4	10
tubule-30				17	9	13	9	8		3	4	8	7		9	0		7	4	15	4	2	4	5
tubule-31				9	10	6	7	8		6	4	7			12	0		6	1	7	9	4	3	7
tubule-32				6	9	5	11	8		5	6	10				3		3	3	6	4	5	5	13
tubule-33				6	13	10	2	5		2	5					6		13	5	8	6	8	5	6
tubule-34				6	11	6	16	10		3	5					6		10	5	6	7	8	8	10
tubule-35				3	15	6	9	23		4	4					4		2	3		2	5	9	4
tubule-36				8	8	3	5	11		7	7					1		3	6		1	4	10	5
tubule-37				6	7	10	8	20		8	8					2		10	10		2	6	9	8
tubule-38				7	5	11	10	6		3	5					4		8	6		2	4	8	10
tubule-39				7	12	9	12			3	3					2		3	0		5	15	1	7
tubule-40				7	10		22				2					4		4	2		6	5	7	12
tubule-41				10	6		13				3					1		1	10		8	3	4	8
tubule-42				11	7		14				2					4		3	3		3	5	9	4
tubule-43					6		14				4					3		0	2		6	6	8	0
tubule-44					2		16				6					4			2		3	6	4	9
tubule-45					3		13				8					5			3		0	9	6	7
tubule-46					4						4					7			1		3	1	4	6
tubule-47					10						5					9			1		7	1	1	5
tubule-48					8						9					6			8		7	4	5	3
tubule-49					17											9			9		5	11	3	5
tubule-50					4											4			3		1		8	8
tubule-51					9											7			3		2		2
tubule-52					13											7			0				2
tubule-53					4											5			1				7
tubule-54																							1
tubule-55
tubule-56
mean	10.0769	8.47826	12.6	9.61905	9.01887	9.30769	9.71111	10.9474	10.28	4.84615	4.375	6.4375	6.7	6.375	5.54839	3.50943	5.19231	4.09302	4.50943	5.70588	4.94118	6.32653	4.7963	6.02
mean			10.3851			9.3152			10.3128			5.21955			6.2078			4.26492			5.05216			5.71428
