# Supplementary material for: SRSF10 is essential for progenitor spermatogonia expansion by regulating alternative splicing
Source: eLife journal article supplement (doi:10.7554/elife.78211), 2022-10-24
Supplement: fig4-data1 [file Figure 4-source data 1.xlsx]

## Sheet: P3
P3 down-regulated genes
	test_id	gene_id	gene	locus	sample_1	sample_2	status	value_1	value_2	log2(fold_change)	test_stat	p_value	q_value	significant
	Ap1s3	Ap1s3	-	chr1:79603450-79668547	P3_ctrl	P3_KO	OK	12.6551	4.50716	-1.48943	-5.16127	5e-05	0.157508	no
	Gm2897	Gm2897	-	chr14:3049284-3077025	P3_ctrl	P3_KO	OK	32.6309	15.9293	-1.03456	-3.44714	0.0004	0.37802	no
	Gm3383	Gm3383	-	chr14:6653690-7119724	P3_ctrl	P3_KO	OK	12.9416	5.97573	-1.11483	-2.70061	0.0061	0.841577	no
	Gm3500	Gm3500	-	chr14:6653690-7119724	P3_ctrl	P3_KO	OK	14.1947	4.63885	-1.61352	-4.03335	0.0002	0.290785	no
	Gm5796	Gm5796	-	chr14:4126976-4144402	P3_ctrl	P3_KO	OK	8.37779	3.08026	-1.44352	-4.26835	5e-05	0.157508	no
	LOC100861615	LOC100861615	-	chr14:7915538-8007047	P3_ctrl	P3_KO	OK	12.2126	3.74289	-1.70614	-3.05163	0.00495	0.736693	no
	Pin4	Pin4	-	chrX:99314803-99323012	P3_ctrl	P3_KO	OK	170.501	82.9141	-1.04009	-3.79486	0.00025	0.337518	no
	Plac9a	Plac9a	-	chr14:26986803-27001837	P3_ctrl	P3_KO	OK	71.7318	20.0825	-1.83667	-3.05943	0.0079	0.887371	no
	Snrnp35	Snrnp35	-	chr5:124933163-124941131	P3_ctrl	P3_KO	OK	7.54177	3.63368	-1.05347	-2.72074	0.00835	0.887371	no
P3 up-regulated genes
	test_id	gene_id	gene	locus	sample_1	sample_2	status	value_1	value_2	log2(fold_change)	test_stat	p_value	q_value	significant
	Derl3	Derl3	-	chr10:75356142-75358686	P3_ctrl	P3_KO	OK	4.63844	9.8234	1.08258	3.1711	0.00195	0.562142	no
	Fos	Fos	-	chr12:86814850-86818219	P3_ctrl	P3_KO	OK	20.4953	45.8321	1.16107	4.44799	5e-05	0.157508	no
	Fosb	Fosb	-	chr7:19888044-19895394	P3_ctrl	P3_KO	OK	3.5157	7.52486	1.09785	3.78064	0.00045	0.405021	no
	Gm7120	Gm7120	-	chr13:120276063-120284312	P3_ctrl	P3_KO	OK	6.81832	19.99	1.55179	4.31357	5e-05	0.157508	no
	Junb	Junb	-	chr8:87500807-87502647	P3_ctrl	P3_KO	OK	4.74779	10.6203	1.1615	3.68726	0.0005	0.423643	no
	Mob1a	Mob1a	-	chr6:83276032-83290943	P3_ctrl	P3_KO	OK	1.64106	5.9281	1.85294	4.52293	0.0001	0.257741	no
	Pisd-ps3	Pisd-ps3	-	chr11:3024023-3093466	P3_ctrl	P3_KO	OK	10.4713	22.1741	1.08244	3.15832	0.00125	0.520742	no
	Scand1	Scand1	-	chr2:156137581-156201374	P3_ctrl	P3_KO	OK	34.7832	73.1859	1.07318	3.80485	0.00015	0.257741	no
	Slc13a2	Slc13a2	-	chr11:78207986-78235687	P3_ctrl	P3_KO	OK	2.54739	5.32324	1.06328	2.99911	0.00335	0.562142	no
	Slc25a30	Slc25a30	-	chr14:76161805-76186844	P3_ctrl	P3_KO	OK	2.30602	5.35159	1.21456	3.22978	0.00225	0.562142	no

## Sheet: P6 down-regulated
test_id	gene_id	gene	locus	sample_1	sample_2	status	value_1	value_2	log2(fold_change)	test_stat	p_value	q_value	significant
2010107G23Rik	2010107G23Rik	-	chr10:61570403-61573761	Ctrl	KO	OK	5.34228	2.05958	-1.3751	-2.99722	0.00015	0.0116752	yes
AV320801	AV320801	-	chrX:132029126-132039133	Ctrl	KO	OK	6.14025	2.02091	-1.60329	-4.60648	5e-05	0.00454036	yes
Afp	Afp	-	chr5:90919739-90937933	Ctrl	KO	OK	5.83003	2.51522	-1.21282	-3.01458	0.0001	0.00822406	yes
Aifm3	Aifm3	-	chr16:17489769-17507578	Ctrl	KO	OK	5.67056	1.97459	-1.52194	-3.86192	5e-05	0.00454036	yes
Ak4	Ak4	-	chr4:101091893-101140376	Ctrl	KO	OK	6.15725	2.88559	-1.09342	-3.68896	5e-05	0.00454036	yes
Aldoc	Aldoc	-	chr11:78137699-78140262	Ctrl	KO	OK	7.15099	3.25416	-1.13586	-2.83264	0.00015	0.0116752	yes
Arl14epl	Arl14epl	-	chr18:47081468-47093876	Ctrl	KO	OK	6.04776	1.87514	-1.6894	-4.03836	5e-05	0.00454036	yes
Asb9	Asb9	-	chrX:160935834-160977684	Ctrl	KO	OK	7.49001	2.53311	-1.56405	-3.12038	0.0002	0.0147754	yes
Asz1	Asz1	-	chr6:18000963-18059061	Ctrl	KO	OK	14.7741	4.68758	-1.65616	-4.79793	5e-05	0.00454036	yes
Ccdc88c	Ccdc88c	-	chr12:102150909-102267193	Ctrl	KO	OK	7.04159	2.65054	-1.40962	-4.92854	5e-05	0.00454036	yes
Cdkn2a	Cdkn2a	-	chr4:88920376-88940523	Ctrl	KO	OK	19.5228	6.9137	-1.49763	-3.81017	5e-05	0.00454036	yes
Cecr2	Cecr2	-	chr6:120616438-120721209	Ctrl	KO	OK	6.29611	1.97497	-1.67263	-5.99118	5e-05	0.00454036	yes
Coprs	Coprs	-	chr8:13884787-13890271	Ctrl	KO	OK	34.1079	15.933	-1.09809	-3.30586	5e-05	0.00454036	yes
Cox7b2	Cox7b2	-	chr5:71834061-71939444	Ctrl	KO	OK	12.2749	3.91063	-1.65024	-2.60546	0.00155	0.0711164	no
Crabp1	Crabp1	-	chr9:54612554-54620917	Ctrl	KO	OK	28.7463	6.74661	-2.09114	-5.06314	5e-05	0.00454036	yes
Cyct	Cyct	-	chr2:76191998-76198510	Ctrl	KO	OK	17.4756	4.38513	-1.99465	-3.81257	5e-05	0.00454036	yes
Dazl	Dazl	-	chr17:50418717-50432945	Ctrl	KO	OK	93.686	32.03	-1.54841	-6.47374	5e-05	0.00454036	yes
Ddx25	Ddx25	-	chr9:35349432-35366055	Ctrl	KO	OK	8.35098	3.12869	-1.41639	-3.5063	5e-05	0.00454036	yes
Ddx4	Ddx4	-	chr13:113388540-113442518	Ctrl	KO	OK	42.7842	14.4558	-1.56543	-6.22095	5e-05	0.00454036	yes
Dgat2	Dgat2	-	chr7:106302172-106331223	Ctrl	KO	OK	11.7355	4.17808	-1.48997	-4.49375	5e-05	0.00454036	yes
Dmrtb1	Dmrtb1	-	chr4:107348894-107356767	Ctrl	KO	OK	5.21201	0.790964	-2.72016	-4.55192	0.0001	0.00822406	yes
Dnd1	Dnd1	-	chr18:36919892-36925868	Ctrl	KO	OK	13.4889	5.19306	-1.37711	-2.67021	0.00045	0.0274327	yes
Dnmt3b	Dnmt3b	-	chr2:153475184-153513466	Ctrl	KO	OK	11.1294	5.38124	-1.04836	-3.82833	5e-05	0.00454036	yes
Dppa5a	Dppa5a	-	chr9:78214860-78216006	Ctrl	KO	OK	6.55722	2.32537	-1.49562	-2.16584	0.0071	0.208398	no
Dusp9	Dusp9	-	chrX:70884779-70888853	Ctrl	KO	OK	11.5582	5.12079	-1.17447	-3.8533	5e-05	0.00454036	yes
Egr4	Egr4	-	chr6:85461115-85463536	Ctrl	KO	OK	16.7226	7.91588	-1.07898	-3.62986	5e-05	0.00454036	yes
Elavl2	Elavl2	-	chr4:90917456-91066675	Ctrl	KO	OK	5.79938	2.2147	-1.38879	-4.08133	5e-05	0.00454036	yes
Epb4.1l4b	Epb4.1l4b	-	chr4:57074597-57156028	Ctrl	KO	OK	11.0803	4.65752	-1.25037	-4.14923	5e-05	0.00454036	yes
Epcam	Epcam	-	chr17:88035318-88050467	Ctrl	KO	OK	20.3472	9.61303	-1.08177	-3.78057	5e-05	0.00454036	yes
Esrp1	Esrp1	-	chr4:11259079-11313930	Ctrl	KO	OK	11.5435	3.62402	-1.67141	-5.72566	5e-05	0.00454036	yes
Fkbp6	Fkbp6	-	chr5:135767573-135825914	Ctrl	KO	OK	61.8879	26.1959	-1.24031	-4.72759	5e-05	0.00454036	yes
Foxc2	Foxc2	-	chr8:123640070-123642794	Ctrl	KO	OK	5.61559	2.22252	-1.33724	-3.54377	5e-05	0.00454036	yes
Foxf1	Foxf1	-	chr8:123608285-123612054	Ctrl	KO	OK	5.27317	1.24536	-2.08211	-4.59796	5e-05	0.00454036	yes
Fsd1	Fsd1	-	chr17:56125933-56136304	Ctrl	KO	OK	8.14476	2.03551	-2.00048	-4.54963	5e-05	0.00454036	yes
Gcat	Gcat	-	chr15:78861303-78873988	Ctrl	KO	OK	9.02902	4.00185	-1.1739	-3.29682	5e-05	0.00454036	yes
Gfra1	Gfra1	-	chr19:58310070-58529888	Ctrl	KO	OK	11.1512	4.58122	-1.2834	-4.64606	5e-05	0.00454036	yes
Glis3	Glis3	-	chr19:28336937-28794517	Ctrl	KO	OK	6.983	2.62002	-1.41427	-4.3566	5e-05	0.00454036	yes
Gm10352	Gm10352	-	chrY:2156898-2168120	Ctrl	KO	OK	34.9169	13.1681	-1.40688	-3.61494	5e-05	0.00454036	yes
Gm14458	Gm14458	-	chrX:8563065-8563798	Ctrl	KO	OK	9.19537	3.11549	-1.56145	-2.64483	0.0011	0.0555899	no
Gm14511	Gm14511	-	chrX:8552843-8553715	Ctrl	KO	OK	6.0467	2.40312	-1.33124	-2.02191	0.0076	0.21616	no
Gm15093	Gm15093	-	chrX_random:562213-602417	Ctrl	KO	OK	5.29329	1.20266	-2.13794	-2.40111	0.0039	0.137924	no
Gm15107	Gm15107	-	chrX:144615266-144955989	Ctrl	KO	OK	13.8167	3.94629	-1.80785	-4.21534	5e-05	0.00454036	yes
Gm21677	Gm21677	-	chrY:2188491-2398856	Ctrl	KO	OK	17.7868	7.94584	-1.16253	-2.66119	0.00035	0.022271	yes
Gm364	Gm364	-	chrX:54662325-54741948	Ctrl	KO	OK	5.47318	1.94742	-1.49082	-3.50855	5e-05	0.00454036	yes
Gm41	Gm41	-	chrX:83590813-83600333	Ctrl	KO	OK	9.48242	1.25432	-2.91835	-3.1208	0.003	0.116752	no
Gm5634	Gm5634	-	chrX:8539259-8540101	Ctrl	KO	OK	9.60375	2.8184	-1.76872	-3.19964	0.0002	0.0147754	yes
Gm6880	Gm6880	-	chrX:71725625-71726738	Ctrl	KO	OK	9.17273	1.20979	-2.92259	-3.58734	0.0003	0.0198878	yes
Gm773	Gm773	-	chrX:53443003-53466058	Ctrl	KO	OK	7.40843	3.17085	-1.2243	-2.3675	0.0025	0.101131	no
Gm7903	Gm7903	-	chrX:131968373-131978536	Ctrl	KO	OK	6.27178	2.07758	-1.59397	-4.66206	5e-05	0.00454036	yes
Gpat2	Gpat2	-	chr2:127250934-127261828	Ctrl	KO	OK	11.3066	2.86091	-1.98262	-5.78441	5e-05	0.00454036	yes
Gtsf1	Gtsf1	-	chr15:103232889-103260858	Ctrl	KO	OK	18.4205	5.88631	-1.64588	-3.53185	5e-05	0.00454036	yes
Gyltl1b	Gyltl1b	-	chr2:92205202-92211214	Ctrl	KO	OK	14.338	6.96523	-1.0416	-3.52317	5e-05	0.00454036	yes
Hba-a1	Hba-a1	-	chr11:32196488-32197310	Ctrl	KO	OK	458.529	200.006	-1.19697	-2.73785	0.0001	0.00822406	yes
Hmga1	Hmga1	-	chr17:27693518-27700617	Ctrl	KO	OK	40.2692	13.1642	-1.61305	-4.20551	5e-05	0.00454036	yes
Hmga1-rs1	Hmga1-rs1	-	chr17:27693518-27700617	Ctrl	KO	OK	41.569	13.8281	-1.58791	-4.06154	5e-05	0.00454036	yes
Hormad1	Hormad1	-	chr3:95363598-95391782	Ctrl	KO	OK	5.51745	1.71202	-1.6883	-3.46076	5e-05	0.00454036	yes
Igf2bp1	Igf2bp1	-	chr11:95818477-95867258	Ctrl	KO	OK	6.06599	2.89576	-1.0668	-3.93955	5e-05	0.00454036	yes
Lcn2	Lcn2	-	chr2:32240156-32243259	Ctrl	KO	OK	7.68261	2.89024	-1.41041	-2.50518	0.0014	0.066149	no
Lin28a	Lin28a	-	chr4:133559244-133574731	Ctrl	KO	OK	13.3066	3.63456	-1.87229	-6.21334	5e-05	0.00454036	yes
M1ap	M1ap	-	chr6:82896915-82980303	Ctrl	KO	OK	5.06823	1.46348	-1.79208	-3.82229	5e-05	0.00454036	yes
Mael	Mael	-	chr1:168131515-168168875	Ctrl	KO	OK	52.3193	14.3035	-1.87098	-6.81708	5e-05	0.00454036	yes
Mageb16	Mageb16	-	chrX:76868569-76916774	Ctrl	KO	OK	6.18933	3.07648	-1.0085	-2.47131	0.00105	0.0533725	no
Mageb4	Mageb4	-	chrX:83495594-83501558	Ctrl	KO	OK	37.714	9.64754	-1.96687	-7.24094	5e-05	0.00454036	yes
Mef2b	Mef2b	-	chr8:72676676-72691387	Ctrl	KO	OK	6.76887	1.80863	-1.90402	-3.69773	5e-05	0.00454036	yes
Morc1	Morc1	-	chr16:48431349-48631018	Ctrl	KO	OK	7.96794	2.51523	-1.66351	-4.81238	5e-05	0.00454036	yes
Mov10l1	Mov10l1	-	chr15:88813423-88885582	Ctrl	KO	OK	13.8624	4.84032	-1.518	-5.4589	5e-05	0.00454036	yes
Mt2	Mt2	-	chr8:96696517-96697467	Ctrl	KO	OK	230.373	98.2128	-1.22999	-4.71542	5e-05	0.00454036	yes
Nanos3	Nanos3	-	chr8:86697631-86700451	Ctrl	KO	OK	5.58519	1.24458	-2.16595	-2.76963	0.00175	0.0788404	no
Nlrp4c	Nlrp4c	-	chr7:5996762-6056751	Ctrl	KO	OK	12.3042	3.66657	-1.74665	-5.81171	5e-05	0.00454036	yes
Nxf2	Nxf2	-	chrX:131479064-131499293	Ctrl	KO	OK	26.1322	6.44528	-2.01951	-6.964	5e-05	0.00454036	yes
Pcgf5	Pcgf5	-	chr19:36453556-36530694	Ctrl	KO	OK	21.3438	8.89088	-1.26342	-4.07318	5e-05	0.00454036	yes
Pdxp	Pdxp	-	chr15:78744348-78749947	Ctrl	KO	OK	9.84812	4.85877	-1.01926	-3.01958	5e-05	0.00454036	yes
Piwil2	Piwil2	-	chr14:70772286-70828901	Ctrl	KO	OK	21.3773	6.92418	-1.62636	-6.34767	5e-05	0.00454036	yes
Pnldc1	Pnldc1	-	chr17:13081767-13102866	Ctrl	KO	OK	7.1035	3.336	-1.09041	-2.71758	0.00045	0.0274327	yes
Pou5f1	Pou5f1	-	chr17:35642976-35647722	Ctrl	KO	OK	13.5367	5.72633	-1.24119	-3.40954	5e-05	0.00454036	yes
Pramef12	Pramef12	-	chr4:143981576-143998367	Ctrl	KO	OK	18.5207	5.45564	-1.76332	-5.83618	5e-05	0.00454036	yes
Pramel1	Pramel1	-	chr4:142984343-142989722	Ctrl	KO	OK	10.9265	3.46883	-1.65531	-4.88926	5e-05	0.00454036	yes
Prr19	Prr19	-	chr7:26086377-26089152	Ctrl	KO	OK	6.39273	1.58568	-2.01133	-3.71497	5e-05	0.00454036	yes
Psma8	Psma8	-	chr18:14864659-14920808	Ctrl	KO	OK	5.52024	2.44527	-1.17474	-2.66572	0.0007	0.0382586	yes
Rbm44	Rbm44	-	chr1:93041679-93067372	Ctrl	KO	OK	5.37947	1.2379	-2.11957	-5.47046	5e-05	0.00454036	yes
Rbmxl2	Rbmxl2	-	chr7:114352958-114354430	Ctrl	KO	OK	10.8391	2.83708	-1.93377	-4.57492	5e-05	0.00454036	yes
Rcor2	Rcor2	-	chr19:7344253-7349715	Ctrl	KO	OK	13.9822	6.55241	-1.09349	-3.50624	5e-05	0.00454036	yes
Ret	Ret	-	chr6:118101765-118147762	Ctrl	KO	OK	9.29862	3.78229	-1.29776	-4.86447	5e-05	0.00454036	yes
Rimklb	Rimklb	-	chr6:122403626-122436323	Ctrl	KO	OK	5.45588	2.07402	-1.39538	-4.11299	5e-05	0.00454036	yes
Rnf17	Rnf17	-	chr14:57021533-57143868	Ctrl	KO	OK	6.58064	2.19325	-1.58516	-5.0716	5e-05	0.00454036	yes
Rpl10l	Rpl10l	-	chr12:67384365-67385388	Ctrl	KO	OK	28.7331	9.20188	-1.64272	-4.77664	5e-05	0.00454036	yes
Rpl39l	Rpl39l	-	chr16:10170320-10175004	Ctrl	KO	OK	32.2514	11.2533	-1.51901	-4.22378	5e-05	0.00454036	yes
Sall4	Sall4	-	chr2:168573831-168592701	Ctrl	KO	OK	11.5674	3.83509	-1.59273	-5.56194	5e-05	0.00454036	yes
Scml2	Scml2	-	chrX:157600681-157696145	Ctrl	KO	OK	19.5486	8.98348	-1.12172	-4.50537	5e-05	0.00454036	yes
Slc25a31	Slc25a31	-	chr3:40512792-40530016	Ctrl	KO	OK	28.1736	8.55511	-1.71949	-6.04834	5e-05	0.00454036	yes
Smagp	Smagp	-	chr15:100451770-100467371	Ctrl	KO	OK	14.598	6.25128	-1.22354	-3.12341	0.0001	0.00822406	yes
Smc1b	Smc1b	-	chr15:84895118-84962387	Ctrl	KO	OK	8.88701	2.78098	-1.6761	-5.38928	5e-05	0.00454036	yes
Smim22	Smim22	-	chr16:5007380-5008401	Ctrl	KO	OK	7.40814	1.56657	-2.2415	-2.02448	0.00895	0.244199	no
Sohlh1	Sohlh1	-	chr2:25698516-25702768	Ctrl	KO	OK	20.8098	4.61852	-2.17176	-5.76763	5e-05	0.00454036	yes
Sohlh2	Sohlh2	-	chr3:54985965-55013879	Ctrl	KO	OK	12.0419	5.14874	-1.22577	-3.87753	5e-05	0.00454036	yes
Sox3	Sox3	-	chrX:58144540-58146605	Ctrl	KO	OK	11.9995	1.19655	-3.32602	-6.89371	5e-05	0.00454036	yes
Spint1	Spint1	-	chr2:119063095-119075249	Ctrl	KO	OK	6.73538	2.86093	-1.23528	-3.28423	5e-05	0.00454036	yes
Stag3	Stag3	-	chr5:138721736-138753621	Ctrl	KO	OK	12.2354	3.90256	-1.64857	-5.75677	5e-05	0.00454036	yes
Stk31	Stk31	-	chr6:49345602-49419501	Ctrl	KO	OK	14.4503	3.42711	-2.07604	-6.74934	5e-05	0.00454036	yes
Stra8	Stra8	-	chr6:34870959-34889342	Ctrl	KO	OK	23.5555	4.25623	-2.46842	-6.76063	5e-05	0.00454036	yes
Susd4	Susd4	-	chr1:184695036-184825785	Ctrl	KO	OK	5.48642	2.12197	-1.37046	-3.22936	5e-05	0.00454036	yes
Syce1	Syce1	-	chr7:147963127-147973753	Ctrl	KO	OK	10.3986	4.01501	-1.37292	-3.48538	5e-05	0.00454036	yes
Sycp1	Sycp1	-	chr3:102622421-102740023	Ctrl	KO	OK	10.6074	3.51305	-1.59428	-5.15356	5e-05	0.00454036	yes
Taf4b	Taf4b	-	chr18:14941753-15058868	Ctrl	KO	OK	6.61155	3.03869	-1.12154	-3.82746	5e-05	0.00454036	yes
Taf7l	Taf7l	-	chrX:130994654-131011029	Ctrl	KO	OK	43.1756	12.6657	-1.7693	-6.46651	5e-05	0.00454036	yes
Taf9b	Taf9b	-	chrX:103402212-103416497	Ctrl	KO	OK	13.8574	5.91928	-1.22716	-4.08885	5e-05	0.00454036	yes
Tcfl5	Tcfl5	-	chr2:180332926-180377396	Ctrl	KO	OK	11.5789	3.64536	-1.66737	-4.1019	5e-05	0.00454036	yes
Tcl1	Tcl1	-	chr12:106454964-106460947	Ctrl	KO	OK	10.5604	4.81038	-1.13444	-2.91832	5e-05	0.00454036	yes
Tdrd1	Tdrd1	-	chr19:56900698-56944502	Ctrl	KO	OK	10.6254	2.35046	-2.1765	-7.20529	5e-05	0.00454036	yes
Tdrd12	Tdrd12	-	chr7:36278628-36322763	Ctrl	KO	OK	6.24067	2.20715	-1.49952	-3.29847	5e-05	0.00454036	yes
Tdrd5	Tdrd5	-	chr1:158185425-158233737	Ctrl	KO	OK	6.57382	2.25731	-1.54213	-4.50391	5e-05	0.00454036	yes
Tdrd9	Tdrd9	-	chr12:113209769-113307065	Ctrl	KO	OK	5.11293	1.35223	-1.91881	-5.33596	5e-05	0.00454036	yes
Tdrkh	Tdrkh	-	chr3:94217239-94235421	Ctrl	KO	OK	8.71773	3.47867	-1.32541	-3.95899	5e-05	0.00454036	yes
Tex101	Tex101	-	chr7:25453030-25457069	Ctrl	KO	OK	24.9362	9.02393	-1.46641	-4.25366	5e-05	0.00454036	yes
Tex11	Tex11	-	chrX:98033986-98254978	Ctrl	KO	OK	9.14663	2.43372	-1.91008	-5.62376	5e-05	0.00454036	yes
Tex12	Tex12	-	chr9:50365252-50369373	Ctrl	KO	OK	9.3132	3.24475	-1.52117	-2.43828	0.00225	0.0929591	no
Tex13	Tex13	-	chrX:137342845-137347972	Ctrl	KO	OK	9.92723	2.99803	-1.72738	-4.68091	5e-05	0.00454036	yes
Tex14	Tex14	-	chr11:87218566-87369325	Ctrl	KO	OK	8.29701	2.6746	-1.63327	-5.43205	5e-05	0.00454036	yes
Tex15	Tex15	-	chr8:34681015-34696057	Ctrl	KO	OK	12.2075	5.11225	-1.25574	-4.96455	5e-05	0.00454036	yes
Tex19.1	Tex19.1	-	chr11:121007456-121009627	Ctrl	KO	OK	37.1869	10.1864	-1.86816	-6.5253	5e-05	0.00454036	yes
Tktl1	Tktl1	-	chrX:71422597-71453837	Ctrl	KO	OK	8.8431	2.07217	-2.09341	-5.45986	5e-05	0.00454036	yes
Trap1a	Trap1a	-	chrX:135774764-135892277	Ctrl	KO	OK	8.74042	3.36565	-1.37682	-3.00407	0.0001	0.00822406	yes
Trim71	Trim71	-	chr9:114420390-114473487	Ctrl	KO	OK	9.47115	2.98851	-1.66411	-5.73041	5e-05	0.00454036	yes
Tuba3a	Tuba3a	-	chr6:125228291-125236060	Ctrl	KO	OK	130.914	37.997	-1.78466	-7.25569	5e-05	0.00454036	yes
Tuba3b	Tuba3b	-	chr6:145564482-145569997	Ctrl	KO	OK	99.4255	31.1848	-1.67278	-6.71588	5e-05	0.00454036	yes
Uba1y	Uba1y	-	chrY_random:43172477-43197989	Ctrl	KO	OK	10.6511	4.58244	-1.21681	-4.28217	5e-05	0.00454036	yes
Uchl1	Uchl1	-	chr5:67017733-67078473	Ctrl	KO	OK	206.517	99.1301	-1.05887	-4.43594	5e-05	0.00454036	yes
Usp26	Usp26	-	chrX:49107135-49154410	Ctrl	KO	OK	12.6994	3.8991	-1.70355	-5.91813	5e-05	0.00454036	yes
Xlr3c	Xlr3c	-	chrX:70499878-70510729	Ctrl	KO	OK	8.37383	2.6216	-1.67544	-3.91985	5e-05	0.00454036	yes
Xlr4b	Xlr4b	-	chrX:70459671-70467792	Ctrl	KO	OK	6.03566	2.44378	-1.3044	-2.57666	0.0005	0.029957	yes
Xlr5a	Xlr5a	-	chrX:70352973-70374599	Ctrl	KO	OK	9.58405	2.18311	-2.13425	-4.82817	5e-05	0.00454036	yes
Xlr5b	Xlr5b	-	chrX:70382570-70403738	Ctrl	KO	OK	11.7936	2.2149	-2.41269	-4.73382	5e-05	0.00454036	yes
Xlr5c	Xlr5c	-	chrX:70530535-70535854	Ctrl	KO	OK	16.4493	2.07536	-2.98659	-4.07458	0.0002	0.0147754	yes
Zbtb16	Zbtb16	-	chr9:48462401-48644050	Ctrl	KO	OK	13.1255	3.14514	-2.06117	-7.21776	5e-05	0.00454036	yes
Zyg11a	Zyg11a	-	chr4:107854538-107890527	Ctrl	KO	OK	6.01379	2.43961	-1.30162	-3.32129	5e-05	0.00454036	yes

## Sheet: P6 up-regulated
test_id	gene_id	gene	locus	sample_1	sample_2	status	value_1	value_2	log2(fold_change)	test_stat	p_value	q_value	significant
Ccl17	Ccl17	-	chr8:97334352-97335936	Ctrl	KO	OK	6.25291	17.7172	1.50256	2.67684	0.0009	0.0469805	yes
Lars2	Lars2	-	chr9:123276057-123371782	Ctrl	KO	OK	90.2892	217.941	1.27131	5.04716	5e-05	0.00454036	yes
Pnmt	Pnmt	-	chr11:98247945-98249411	Ctrl	KO	OK	19.1399	40.5281	1.08234	3.37243	5e-05	0.00454036	yes

## Sheet: P8 down-regulated
test_id	gene_id	gene	locus	sample_1	sample_2	status	value_1	value_2	log2(fold_change)	test_stat	p_value	q_value	significant
Ccnb1ip1	Ccnb1ip1	-	chr14:51408923-51415403	P8_Ctrl	P8_KO	OK	6.75299	3.29123	-1.0369	-1.87651	0.00925	0.105344	no
Figla	Figla	-	chr6:85967184-85970990	P8_Ctrl	P8_KO	OK	5.30692	0.545546	-3.2821	-2.85476	0.0078	0.0943174	no
Rad54b	Rad54b	-	chr4:11486066-11542955	P8_Ctrl	P8_KO	OK	7.89212	3.69522	-1.09475	-2.07897	0.00665	0.0860203	no
Lmo1	Lmo1	-	chr7:116282078-116318721	P8_Ctrl	P8_KO	OK	13.0648	6.17907	-1.08023	-1.98947	0.0058	0.0792742	no
AU022751	AU022751	-	chrX:5658335-5660538	P8_Ctrl	P8_KO	OK	6.3035	3.04856	-1.04803	-2.01565	0.00545	0.076326	no
Gm6880	Gm6880	-	chrX:71725625-71726738	P8_Ctrl	P8_KO	OK	17.0005	6.7441	-1.33388	-2.14689	0.00485	0.0705011	no
Adad1	Adad1	-	chr3:36962577-37010434	P8_Ctrl	P8_KO	OK	5.47008	2.41471	-1.17971	-2.15293	0.0044	0.066483	no
Gnat2	Gnat2	-	chr3:107895983-107904348	P8_Ctrl	P8_KO	OK	5.59274	2.36227	-1.24338	-2.19242	0.0041	0.0641508	no
Gm41	Gm41	-	chrX:83590813-83600333	P8_Ctrl	P8_KO	OK	20.0083	6.60322	-1.59936	-2.34382	0.00355	0.0575911	no
Dpep3	Dpep3	-	chr8:108497419-108503319	P8_Ctrl	P8_KO	OK	8.19596	3.61935	-1.17918	-2.2332	0.0034	0.0557739	no
Ica1	Ica1	-	chr6:8580526-8728484	P8_Ctrl	P8_KO	OK	9.77114	4.83724	-1.01434	-2.12705	0.0033	0.054591	no
Tspan33	Tspan33	-	chr6:29644213-29668558	P8_Ctrl	P8_KO	OK	5.35841	2.32969	-1.20167	-2.19247	0.0032	0.0533879	no
Ropn1l	Ropn1l	-	chr15:31370964-31383444	P8_Ctrl	P8_KO	OK	8.52459	3.12338	-1.44852	-2.21153	0.00295	0.0507055	no
Fam208b	Fam208b	-	chr13:3537320-3610354	P8_Ctrl	P8_KO	OK	29.5121	13.8066	-1.09595	-2.15439	0.0028	0.0492811	yes
Gm10439	Gm10439	-	chrX:146029143-146071164	P8_Ctrl	P8_KO	OK	7.37734	3.33433	-1.14571	-2.22105	0.0028	0.0492811	yes
Pisd-ps2	Pisd-ps2	-	chr17:3064317-3084183	P8_Ctrl	P8_KO	OK	5.38321	2.02912	-1.40761	-2.27431	0.0028	0.0492811	yes
Gm15107	Gm15107	-	chrX:144615266-144955989	P8_Ctrl	P8_KO	OK	27.8016	13.5632	-1.03547	-2.21393	0.00215	0.0413072	yes
Bin2	Bin2	-	chr15:100471512-100499931	P8_Ctrl	P8_KO	OK	7.88915	3.59192	-1.13512	-2.28192	0.00175	0.0361448	yes
Rhox13	Rhox13	-	chrX:35474016-35483143	P8_Ctrl	P8_KO	OK	12.489	5.41869	-1.20464	-2.34623	0.00135	0.0303759	yes
Ddx43	Ddx43	-	chr9:78243583-78271396	P8_Ctrl	P8_KO	OK	6.89381	2.93152	-1.23365	-2.44469	0.00125	0.0286378	yes
Zyg11a	Zyg11a	-	chr4:107854538-107890527	P8_Ctrl	P8_KO	OK	10.1527	4.84399	-1.06759	-2.41094	0.00115	0.0269783	yes
Fam178b	Fam178b	-	chr1:36619540-36740028	P8_Ctrl	P8_KO	OK	8.7699	4.01561	-1.12694	-2.32918	0.0011	0.0263312	yes
Dapk2	Dapk2	-	chr9:66006032-66120049	P8_Ctrl	P8_KO	OK	5.67735	2.1153	-1.42436	-2.47931	0.001	0.0246751	yes
Nanos1	Nanos1	-	chr19:60831889-60835817	P8_Ctrl	P8_KO	OK	6.71148	3.22557	-1.05708	-2.48637	0.00085	0.0221201	yes
Plekhg4	Plekhg4	-	chr8:107899280-107937402	P8_Ctrl	P8_KO	OK	5.07057	2.35199	-1.10826	-2.44289	0.00085	0.0221201	yes
Boll	Boll	-	chr1:55356912-55420313	P8_Ctrl	P8_KO	OK	10.4483	3.54039	-1.56128	-2.62696	0.00075	0.0203285	yes
Prss50	Prss50	-	chr9:110760470-110767132	P8_Ctrl	P8_KO	OK	6.11417	1.97078	-1.63339	-2.46937	0.00075	0.0203285	yes
Ccdc36	Ccdc36	-	chr9:108305963-108330813	P8_Ctrl	P8_KO	OK	5.01566	2.01304	-1.31706	-2.5804	0.0007	0.0193301	yes
Elavl2	Elavl2	-	chr4:90917456-91066675	P8_Ctrl	P8_KO	OK	8.72686	4.13449	-1.07775	-2.61804	0.00065	0.0183815	yes
Sycp3	Sycp3	-	chr10:87922331-87966715	P8_Ctrl	P8_KO	OK	48.2336	12.1911	-1.98421	-2.81661	0.0006	0.0173008	yes
Bnc1	Bnc1	-	chr7:89111547-89137185	P8_Ctrl	P8_KO	OK	7.21011	3.5944	-1.00427	-2.49694	0.0005	0.0151357	yes
Ccdc138	Ccdc138	-	chr10:57960684-58038992	P8_Ctrl	P8_KO	OK	5.9949	2.29093	-1.38781	-2.71304	0.0005	0.0151357	yes
Map7d2	Map7d2	-	chrX:155852509-155936879	P8_Ctrl	P8_KO	OK	8.10528	3.94379	-1.03928	-2.53964	0.0005	0.0151357	yes
Ccdc92	Ccdc92	-	chr5:125314801-125342591	P8_Ctrl	P8_KO	OK	8.0933	3.37742	-1.2608	-2.5901	0.00045	0.0139334	yes
Smagp	Smagp	-	chr15:100451770-100467371	P8_Ctrl	P8_KO	OK	29.0119	13.4074	-1.11362	-2.53638	0.00045	0.0139334	yes
Pramel3	Pramel3	-	chrX:131836854-131847175	P8_Ctrl	P8_KO	OK	7.02064	3.15927	-1.15201	-2.67999	0.0004	0.0129783	yes
Tcfl5	Tcfl5	-	chr2:180332926-180377396	P8_Ctrl	P8_KO	OK	22.3295	10.2862	-1.11825	-2.72175	0.0004	0.0129783	yes
1700001L05Rik	1700001L05Rik	-	chr15:83184276-83197727	P8_Ctrl	P8_KO	OK	7.6851	3.67768	-1.06327	-2.84048	0.00035	0.0116565	yes
Aifm3	Aifm3	-	chr16:17489769-17507578	P8_Ctrl	P8_KO	OK	11.7902	5.73972	-1.03854	-2.53365	0.00035	0.0116565	yes
Orc1	Orc1	-	chr4:108252058-108287436	P8_Ctrl	P8_KO	OK	11.0743	5.37653	-1.04247	-2.5697	0.00035	0.0116565	yes
Chd3os	Chd3os	-	chr11:69154270-69156149	P8_Ctrl	P8_KO	OK	25.5784	12.7631	-1.00295	-2.62319	0.00025	0.00908144	yes
Pnma5	Pnma5	-	chrX:70279319-70282442	P8_Ctrl	P8_KO	OK	10.5999	4.5085	-1.23334	-2.76522	0.00025	0.00908144	yes
Setdb2	Setdb2	-	chr14:60020847-60059714	P8_Ctrl	P8_KO	OK	11.234	4.80216	-1.22611	-2.99773	0.00025	0.00908144	yes
Tdrkh	Tdrkh	-	chr3:94217239-94235421	P8_Ctrl	P8_KO	OK	14.5782	7.15431	-1.02693	-2.60408	0.00025	0.00908144	yes
1700013H16Rik	1700013H16Rik	-	chrX:51046077-51061008	P8_Ctrl	P8_KO	OK	10.724	2.40311	-2.15787	-3.48266	0.0002	0.00777837	yes
4930447C04Rik	4930447C04Rik	-	chr12:73982095-74018752	P8_Ctrl	P8_KO	OK	16.7561	7.63373	-1.13422	-2.7175	0.0002	0.00777837	yes
Arl14epl	Arl14epl	-	chr18:47081468-47093876	P8_Ctrl	P8_KO	OK	11.2557	4.76832	-1.2391	-2.79995	0.0002	0.00777837	yes
Ccdc136	Ccdc136	-	chr6:29348925-29376995	P8_Ctrl	P8_KO	OK	10.0488	4.59315	-1.12947	-2.77562	0.0002	0.00777837	yes
Ccdc172	Ccdc172	-	chr19:58586491-58627575	P8_Ctrl	P8_KO	OK	7.6095	1.61215	-2.23881	-3.11793	0.0002	0.00777837	yes
Ott	Ott	-	chrX:144615266-144955989	P8_Ctrl	P8_KO	OK	21.5809	5.01122	-2.10652	-3.4858	0.0002	0.00777837	yes
AV320801	AV320801	-	chrX:132029126-132039133	P8_Ctrl	P8_KO	OK	10.3603	4.59553	-1.17276	-2.95796	0.00015	0.00626232	yes
Fnip2	Fnip2	-	chr3:79149297-79371601	P8_Ctrl	P8_KO	OK	8.71139	4.29621	-1.01984	-2.88535	0.00015	0.00626232	yes
LOC100503280	LOC100503280	-	chrX:72212182-72214464	P8_Ctrl	P8_KO	OK	6.36978	1.22461	-2.37892	-3.63031	0.00015	0.00626232	yes
Map3k5	Map3k5	-	chr10:19654331-19862556	P8_Ctrl	P8_KO	OK	10.02	4.94257	-1.01955	-2.82971	0.00015	0.00626232	yes
Pls1	Pls1	-	chr9:95653060-95745698	P8_Ctrl	P8_KO	OK	5.65864	2.44164	-1.2126	-2.66238	0.00015	0.00626232	yes
Ripk4	Ripk4	-	chr16:97963548-97985362	P8_Ctrl	P8_KO	OK	7.30672	2.95728	-1.30495	-2.98158	0.00015	0.00626232	yes
Upp1	Upp1	-	chr11:9018010-9036173	P8_Ctrl	P8_KO	OK	7.46218	1.5983	-2.22306	-3.31603	0.00015	0.00626232	yes
4933427D06Rik	4933427D06Rik	-	chr6:89046108-89060031	P8_Ctrl	P8_KO	OK	10.9032	4.56216	-1.25696	-2.92166	0.0001	0.00461204	yes
Bnc2	Bnc2	-	chr4:83918445-84320990	P8_Ctrl	P8_KO	OK	8.96057	4.29286	-1.06165	-2.97117	0.0001	0.00461204	yes
Gm7903	Gm7903	-	chrX:131968373-131978536	P8_Ctrl	P8_KO	OK	11.2797	5.39141	-1.06499	-2.79063	0.0001	0.00461204	yes
Gpat2	Gpat2	-	chr2:127250934-127261828	P8_Ctrl	P8_KO	OK	17.2938	8.63781	-1.00152	-2.65074	0.0001	0.00461204	yes
Syce1	Syce1	-	chr7:147963127-147973753	P8_Ctrl	P8_KO	OK	19.3679	8.22903	-1.23487	-2.81932	0.0001	0.00461204	yes
Tex12	Tex12	-	chr9:50365252-50369373	P8_Ctrl	P8_KO	OK	22.0907	5.64404	-1.96864	-3.07739	0.0001	0.00461204	yes
4932438A13Rik	4932438A13Rik	-	chr3:36762027-36951955	P8_Ctrl	P8_KO	OK	20.4147	9.42389	-1.11522	-3.86365	5e-05	0.00269388	yes
A830080D01Rik	A830080D01Rik	-	chrX:155970599-156031013	P8_Ctrl	P8_KO	OK	18.2566	7.40591	-1.30167	-3.58483	5e-05	0.00269388	yes
Ankrd12	Ankrd12	-	chr17:66316840-66426386	P8_Ctrl	P8_KO	OK	8.87713	4.00242	-1.14922	-3.38514	5e-05	0.00269388	yes
Ankrd26	Ankrd26	-	chr6:118452581-118512274	P8_Ctrl	P8_KO	OK	7.04412	3.35433	-1.0704	-2.77501	5e-05	0.00269388	yes
Atm	Atm	-	chr9:53245226-53344776	P8_Ctrl	P8_KO	OK	14.3169	6.79795	-1.07455	-3.54231	5e-05	0.00269388	yes
Ccdc88c	Ccdc88c	-	chr12:102150909-102267193	P8_Ctrl	P8_KO	OK	11.5557	5.4309	-1.08934	-3.1593	5e-05	0.00269388	yes
Cecr2	Cecr2	-	chr6:120616438-120721209	P8_Ctrl	P8_KO	OK	13.3736	5.15115	-1.37642	-4.2673	5e-05	0.00269388	yes
Cenpf	Cenpf	-	chr1:191464492-191511965	P8_Ctrl	P8_KO	OK	25.1102	11.6328	-1.11008	-3.80559	5e-05	0.00269388	yes
Clic6	Clic6	-	chr16:92498391-92541486	P8_Ctrl	P8_KO	OK	5.75914	2.04479	-1.4939	-3.19684	5e-05	0.00269388	yes
Cpeb1	Cpeb1	-	chr7:88491911-88599644	P8_Ctrl	P8_KO	OK	8.61359	3.64484	-1.24076	-2.83309	5e-05	0.00269388	yes
D330045A20Rik	D330045A20Rik	-	chrX:136014905-136089119	P8_Ctrl	P8_KO	OK	8.13537	2.7294	-1.57563	-3.63645	5e-05	0.00269388	yes
Dazl	Dazl	-	chr17:50418717-50432945	P8_Ctrl	P8_KO	OK	220.181	91.2664	-1.27053	-4.52496	5e-05	0.00269388	yes
Dclk2	Dclk2	-	chr3:86590071-86724806	P8_Ctrl	P8_KO	OK	6.7881	2.99311	-1.18136	-2.73091	5e-05	0.00269388	yes
Ddx25	Ddx25	-	chr9:35349432-35366055	P8_Ctrl	P8_KO	OK	27.1129	6.79985	-1.9954	-4.7252	5e-05	0.00269388	yes
Ddx4	Ddx4	-	chr13:113388540-113442518	P8_Ctrl	P8_KO	OK	68.806	30.4907	-1.17417	-3.90245	5e-05	0.00269388	yes
Dmxl2	Dmxl2	-	chr9:54212964-54349433	P8_Ctrl	P8_KO	OK	10.9744	5.07639	-1.11227	-3.48046	5e-05	0.00269388	yes
Dnmt3b	Dnmt3b	-	chr2:153475184-153513466	P8_Ctrl	P8_KO	OK	22.7218	10.3349	-1.13655	-3.39441	5e-05	0.00269388	yes
Dock3	Dock3	-	chr9:106795155-107134240	P8_Ctrl	P8_KO	OK	6.67262	2.04358	-1.70716	-4.5361	5e-05	0.00269388	yes
Edrf1	Edrf1	-	chr7:140829357-140864700	P8_Ctrl	P8_KO	OK	15.9316	7.51496	-1.08405	-3.22355	5e-05	0.00269388	yes
Eif5a2	Eif5a2	-	chr3:28680232-28697768	P8_Ctrl	P8_KO	OK	28.1877	12.4643	-1.17726	-3.73361	5e-05	0.00269388	yes
Esco2	Esco2	-	chr14:66437863-66452806	P8_Ctrl	P8_KO	OK	32.1048	13.8059	-1.2175	-3.63326	5e-05	0.00269388	yes
Esrp1	Esrp1	-	chr4:11259079-11313930	P8_Ctrl	P8_KO	OK	16.3537	6.22146	-1.39429	-3.81865	5e-05	0.00269388	yes
Esx1	Esx1	-	chrX:133649935-133654865	P8_Ctrl	P8_KO	OK	11.8126	3.4857	-1.76081	-3.26218	5e-05	0.00269388	yes
Fam217b	Fam217b	-	chr2:178149238-178156866	P8_Ctrl	P8_KO	OK	7.31341	2.64338	-1.46816	-2.92447	5e-05	0.00269388	yes
Fancd2	Fancd2	-	chr6:113481675-113546279	P8_Ctrl	P8_KO	OK	14.4776	6.60962	-1.13118	-3.21373	5e-05	0.00269388	yes
Foxf1	Foxf1	-	chr8:123608285-123612054	P8_Ctrl	P8_KO	OK	8.17738	2.01881	-2.01814	-3.85325	5e-05	0.00269388	yes
Gm1564	Gm1564	-	chr11:102526898-102543552	P8_Ctrl	P8_KO	OK	6.39091	1.48354	-2.10698	-4.33984	5e-05	0.00269388	yes
Heatr1	Heatr1	-	chr13:12487641-12531160	P8_Ctrl	P8_KO	OK	36.1611	15.7827	-1.19609	-4.04995	5e-05	0.00269388	yes
Hells	Hells	-	chr19:39005479-39042767	P8_Ctrl	P8_KO	OK	108.795	41.7673	-1.38117	-4.7296	5e-05	0.00269388	yes
Henmt1	Henmt1	-	chr3:108743001-108763694	P8_Ctrl	P8_KO	OK	9.0315	2.20382	-2.03496	-3.79704	5e-05	0.00269388	yes
Herc1	Herc1	-	chr9:66198256-66362400	P8_Ctrl	P8_KO	OK	21.5445	9.54101	-1.17511	-3.93801	5e-05	0.00269388	yes
Hormad1	Hormad1	-	chr3:95363598-95391782	P8_Ctrl	P8_KO	OK	13.9611	4.37723	-1.67332	-3.48079	5e-05	0.00269388	yes
Kit	Kit	-	chr5:75971011-76052746	P8_Ctrl	P8_KO	OK	33.4383	16.7108	-1.00072	-3.30299	5e-05	0.00269388	yes
Lin28a	Lin28a	-	chr4:133559244-133574731	P8_Ctrl	P8_KO	OK	29.748	7.38008	-2.01108	-5.70956	5e-05	0.00269388	yes
Lin28b	Lin28b	-	chr10:45096424-45190007	P8_Ctrl	P8_KO	OK	5.27996	2.21521	-1.25308	-2.96107	5e-05	0.00269388	yes
Mael	Mael	-	chr1:168131515-168168875	P8_Ctrl	P8_KO	OK	104.24	48.9738	-1.08983	-3.48266	5e-05	0.00269388	yes
Mdn1	Mdn1	-	chr4:32744093-32862192	P8_Ctrl	P8_KO	OK	35.8864	15.3326	-1.22683	-4.39606	5e-05	0.00269388	yes
Morc1	Morc1	-	chr16:48431349-48631018	P8_Ctrl	P8_KO	OK	16.369	7.26568	-1.17179	-3.11473	5e-05	0.00269388	yes
Mov10l1	Mov10l1	-	chr15:88813423-88885582	P8_Ctrl	P8_KO	OK	34.5342	14.36	-1.26597	-3.99485	5e-05	0.00269388	yes
Nbeal1	Nbeal1	-	chr1:60237442-60391549	P8_Ctrl	P8_KO	OK	6.02846	2.85709	-1.07724	-3.15073	5e-05	0.00269388	yes
Ndrg4	Ndrg4	-	chr8:98226936-98239019	P8_Ctrl	P8_KO	OK	24.0628	11.5778	-1.05545	-3.03657	5e-05	0.00269388	yes
Neto2	Neto2	-	chr8:88160486-88214908	P8_Ctrl	P8_KO	OK	7.93357	3.44674	-1.20274	-3.14869	5e-05	0.00269388	yes
Nlrp4c	Nlrp4c	-	chr7:5996762-6056751	P8_Ctrl	P8_KO	OK	25.1785	11.0346	-1.19016	-3.54431	5e-05	0.00269388	yes
Nxf2	Nxf2	-	chrX:131479064-131499293	P8_Ctrl	P8_KO	OK	73.5044	21.1929	-1.79425	-5.57631	5e-05	0.00269388	yes
Pask	Pask	-	chr1:95206013-95239365	P8_Ctrl	P8_KO	OK	15.629	7.06845	-1.14476	-3.36484	5e-05	0.00269388	yes
Pcgf5	Pcgf5	-	chr19:36453556-36530694	P8_Ctrl	P8_KO	OK	58.9436	23.2194	-1.344	-3.87787	5e-05	0.00269388	yes
Pgap1	Pgap1	-	chr1:54529843-54614528	P8_Ctrl	P8_KO	OK	5.32148	2.34198	-1.1841	-3.27671	5e-05	0.00269388	yes
Pgm2l1	Pgm2l1	-	chr7:107376116-107427382	P8_Ctrl	P8_KO	OK	9.6457	3.63549	-1.40774	-4.05557	5e-05	0.00269388	yes
Pik3r3	Pik3r3	-	chr4:115894518-115975661	P8_Ctrl	P8_KO	OK	20.5679	9.63073	-1.09468	-3.35441	5e-05	0.00269388	yes
Piwil2	Piwil2	-	chr14:70772286-70828901	P8_Ctrl	P8_KO	OK	51.5047	17.5817	-1.55063	-5.16521	5e-05	0.00269388	yes
Pole	Pole	-	chr5:110715337-110766472	P8_Ctrl	P8_KO	OK	21.6286	10.0547	-1.10507	-3.56787	5e-05	0.00269388	yes
Prkdc	Prkdc	-	chr16:15637958-15842332	P8_Ctrl	P8_KO	OK	8.33145	3.48966	-1.25548	-3.83287	5e-05	0.00269388	yes
Ptpn4	Ptpn4	-	chr1:121554669-121733648	P8_Ctrl	P8_KO	OK	10.5658	4.71148	-1.16515	-3.12205	5e-05	0.00269388	yes
Rasa2	Rasa2	-	chr9:96439718-96531922	P8_Ctrl	P8_KO	OK	15.9366	7.18732	-1.14882	-3.46018	5e-05	0.00269388	yes
Rbm44	Rbm44	-	chr1:93041679-93067372	P8_Ctrl	P8_KO	OK	12.0445	3.7985	-1.66487	-4.19778	5e-05	0.00269388	yes
Rec8	Rec8	-	chr14:56237002-56244232	P8_Ctrl	P8_KO	OK	9.60311	3.40324	-1.49659	-3.01826	5e-05	0.00269388	yes
Reln	Reln	-	chr5:21390271-21850523	P8_Ctrl	P8_KO	OK	5.43544	1.83213	-1.56887	-4.28157	5e-05	0.00269388	yes
Rnf17	Rnf17	-	chr14:57021533-57143868	P8_Ctrl	P8_KO	OK	16.6277	4.72568	-1.81499	-5.07581	5e-05	0.00269388	yes
Sall4	Sall4	-	chr2:168573831-168592701	P8_Ctrl	P8_KO	OK	20.8884	8.23498	-1.34287	-3.78203	5e-05	0.00269388	yes
Scml2	Scml2	-	chrX:157600681-157696145	P8_Ctrl	P8_KO	OK	34.5171	15.8815	-1.11996	-3.68613	5e-05	0.00269388	yes
Slc25a31	Slc25a31	-	chr3:40512792-40530016	P8_Ctrl	P8_KO	OK	65.6526	23.5617	-1.47841	-4.54959	5e-05	0.00269388	yes
Smc1b	Smc1b	-	chr15:84895118-84962387	P8_Ctrl	P8_KO	OK	21.9563	7.30456	-1.58777	-4.53919	5e-05	0.00269388	yes
Spata5	Spata5	-	chr3:37319201-37478017	P8_Ctrl	P8_KO	OK	64.8922	32.3568	-1.00398	-3.34254	5e-05	0.00269388	yes
Stag3	Stag3	-	chr5:138721736-138753621	P8_Ctrl	P8_KO	OK	28.9569	10.4727	-1.46727	-4.47113	5e-05	0.00269388	yes
Stk31	Stk31	-	chr6:49345602-49419501	P8_Ctrl	P8_KO	OK	23.9027	9.19108	-1.37887	-3.93749	5e-05	0.00269388	yes
Stra8	Stra8	-	chr6:34870959-34889342	P8_Ctrl	P8_KO	OK	75.1738	21.1579	-1.82903	-5.21961	5e-05	0.00269388	yes
Sycp1	Sycp1	-	chr3:102622421-102740023	P8_Ctrl	P8_KO	OK	29.1688	7.96784	-1.87217	-5.34811	5e-05	0.00269388	yes
Sycp2	Sycp2	-	chr2:178080000-178142363	P8_Ctrl	P8_KO	OK	9.99021	3.55744	-1.48968	-3.99249	5e-05	0.00269388	yes
Taf7l	Taf7l	-	chrX:130994654-131011029	P8_Ctrl	P8_KO	OK	103.433	47.0649	-1.13597	-3.75144	5e-05	0.00269388	yes
Taf9b	Taf9b	-	chrX:103402212-103416497	P8_Ctrl	P8_KO	OK	40.7561	14.6853	-1.47264	-4.32587	5e-05	0.00269388	yes
Tdrd1	Tdrd1	-	chr19:56900698-56944502	P8_Ctrl	P8_KO	OK	23.6854	7.11553	-1.73496	-5.21892	5e-05	0.00269388	yes
Tdrd5	Tdrd5	-	chr1:158185425-158233737	P8_Ctrl	P8_KO	OK	11.5781	4.43949	-1.38293	-3.46306	5e-05	0.00269388	yes
Tdrd9	Tdrd9	-	chr12:113209769-113307065	P8_Ctrl	P8_KO	OK	13.95	3.76612	-1.88912	-5.00111	5e-05	0.00269388	yes
Tex11	Tex11	-	chrX:98033986-98254978	P8_Ctrl	P8_KO	OK	28.2897	8.70301	-1.70069	-4.87496	5e-05	0.00269388	yes
Tex13	Tex13	-	chrX:137342845-137347972	P8_Ctrl	P8_KO	OK	20.2856	8.61679	-1.23523	-3.1216	5e-05	0.00269388	yes
Tex14	Tex14	-	chr11:87218566-87369325	P8_Ctrl	P8_KO	OK	19.1974	7.16451	-1.42197	-4.16292	5e-05	0.00269388	yes
Tex15	Tex15	-	chr8:34681015-34696057	P8_Ctrl	P8_KO	OK	31.023	10.6177	-1.54687	-5.1843	5e-05	0.00269388	yes
Tex16	Tex16	-	chrX:109207128-109240935	P8_Ctrl	P8_KO	OK	6.70589	1.5788	-2.0866	-4.407	5e-05	0.00269388	yes
Tktl1	Tktl1	-	chrX:71422597-71453837	P8_Ctrl	P8_KO	OK	21.5594	9.2531	-1.22031	-3.27078	5e-05	0.00269388	yes
Uba1y	Uba1y	-	chrY_random:43172477-43197989	P8_Ctrl	P8_KO	OK	24.4058	9.08555	-1.42558	-4.20874	5e-05	0.00269388	yes
Usp26	Usp26	-	chrX:49107135-49154410	P8_Ctrl	P8_KO	OK	24.0909	10.3078	-1.22475	-3.70116	5e-05	0.00269388	yes
Usp34	Usp34	-	chr11:23206894-23398039	P8_Ctrl	P8_KO	OK	48.3239	23.6274	-1.03227	-3.35642	5e-05	0.00269388	yes
Vps13a	Vps13a	-	chr19:16689855-16855423	P8_Ctrl	P8_KO	OK	13.4314	5.9477	-1.17521	-3.77449	5e-05	0.00269388	yes
Vps13c	Vps13c	-	chr9:67688202-67843441	P8_Ctrl	P8_KO	OK	11.4155	4.43513	-1.36394	-4.2374	5e-05	0.00269388	yes
Xlr5a	Xlr5a	-	chrX:70352973-70374599	P8_Ctrl	P8_KO	OK	18.0881	6.8778	-1.39502	-3.14226	5e-05	0.00269388	yes
Xlr5b	Xlr5b	-	chrX:70382570-70403738	P8_Ctrl	P8_KO	OK	22.6472	7.56067	-1.58274	-3.26893	5e-05	0.00269388	yes
Zbtb16	Zbtb16	-	chr9:48462401-48644050	P8_Ctrl	P8_KO	OK	14.3157	5.90007	-1.27879	-3.65614	5e-05	0.00269388	yes
Zcwpw1	Zcwpw1	-	chr5:138229029-138277506	P8_Ctrl	P8_KO	OK	27.7078	10.902	-1.3457	-3.52024	5e-05	0.00269388	yes
Zfp518a	Zfp518a	-	chr19:40969192-40992437	P8_Ctrl	P8_KO	OK	26.6974	12.8722	-1.05244	-3.49186	5e-05	0.00269388	yes
Zswim5	Zswim5	-	chr4:116550006-116661710	P8_Ctrl	P8_KO	OK	8.75272	2.66229	-1.71706	-4.32282	5e-05	0.00269388	yes

## Sheet: P8 up-regulated
test_id	gene_id	gene	locus	sample_1	sample_2	status	value_1	value_2	log2(fold_change)	test_stat	p_value	q_value	significant
1110007C09Rik	1110007C09Rik	-	chr13:49298319-49311395	P8_Ctrl	P8_KO	OK	13.5677	29.0869	1.10019	2.3368	0.0013	0.029591	yes
1190002F15Rik	1190002F15Rik	-	chr6:134879109-134901736	P8_Ctrl	P8_KO	OK	2.844	11.227	1.98098	2.45956	0.0025	0.0457373	yes
1810009A15Rik	1810009A15Rik	-	chr19:8958367-8965249	P8_Ctrl	P8_KO	OK	17.5969	37.4104	1.08812	2.21292	0.0025	0.0457373	yes
2200002J24Rik	2200002J24Rik	-	chr7:31483944-31485553	P8_Ctrl	P8_KO	OK	3.06937	13.5689	2.14429	2.82937	0.0008	0.0211946	yes
2310011J03Rik	2310011J03Rik	-	chr10:79764564-79783293	P8_Ctrl	P8_KO	OK	11.912	28.0824	1.23725	3.00928	5e-05	0.00269388	yes
2310047M10Rik	2310047M10Rik	-	chr11:68873276-68875078	P8_Ctrl	P8_KO	OK	6.26056	14.1923	1.18075	2.6513	0.00025	0.00908144	yes
2410004N09Rik	2410004N09Rik	-	chr18:33954545-33955643	P8_Ctrl	P8_KO	OK	27.4766	62.1922	1.17853	2.26847	0.00225	0.0426701	yes
2410006H16Rik	2410006H16Rik	-	chr11:62416378-62418308	P8_Ctrl	P8_KO	OK	39.9801	127.602	1.6743	3.79081	5e-05	0.00269388	yes
2810410L24Rik	2810410L24Rik	-	chr11:120047963-120051170	P8_Ctrl	P8_KO	OK	2.45432	5.40231	1.13825	1.9813	0.00695	0.0877743	no
4930413G21Rik	4930413G21Rik	-	chr7:130112571-130113973	P8_Ctrl	P8_KO	OK	2.28724	16.1311	2.81817	4.99176	5e-05	0.00269388	yes
A930005H10Rik	A930005H10Rik	-	chr3:115584496-115591048	P8_Ctrl	P8_KO	OK	3.24982	8.65734	1.41356	1.91555	0.00955	0.107099	no
Acbd6	Acbd6	-	chr1:157405249-157534363	P8_Ctrl	P8_KO	OK	28.8466	61.1057	1.08291	2.98516	0.0001	0.00461204	yes
Acn9	Acn9	-	chr6:6906017-6989220	P8_Ctrl	P8_KO	OK	13.8567	30.0496	1.11676	2.04579	0.00505	0.0728076	no
Aes	Aes	-	chr10:81022188-81029116	P8_Ctrl	P8_KO	OK	215.292	449.649	1.06251	3.80852	5e-05	0.00269388	yes
Agpat2	Agpat2	-	chr2:26448576-26459937	P8_Ctrl	P8_KO	OK	5.47549	11.4974	1.07025	2.24096	0.0018	0.0367467	yes
Agt	Agt	-	chr8:127080486-127093607	P8_Ctrl	P8_KO	OK	6.75176	14.8523	1.13735	2.62556	0.00045	0.0139334	yes
Akr7a5	Akr7a5	-	chr4:138866658-138874701	P8_Ctrl	P8_KO	OK	23.5935	57.9661	1.29682	3.77692	5e-05	0.00269388	yes
Alas2	Alas2	-	chrX:146981927-147005165	P8_Ctrl	P8_KO	OK	4.49354	13.2915	1.56458	3.44606	5e-05	0.00269388	yes
Aldh1b1	Aldh1b1	-	chr4:45811893-45817480	P8_Ctrl	P8_KO	OK	12.653	25.4448	1.00789	2.7773	5e-05	0.00269388	yes
Aldh2	Aldh2	-	chr5:122017695-122043833	P8_Ctrl	P8_KO	OK	69.4366	158.794	1.19339	4.10184	5e-05	0.00269388	yes
Amh	Amh	-	chr10:80267992-80270393	P8_Ctrl	P8_KO	OK	120.324	459.896	1.93438	6.83614	5e-05	0.00269388	yes
Aqp12	Aqp12	-	chr1:94902910-94908846	P8_Ctrl	P8_KO	OK	2.73757	8.61607	1.65413	2.67364	0.00095	0.0239443	yes
Aqp2	Aqp2	-	chr15:99409486-99414976	P8_Ctrl	P8_KO	OK	4.3655	9.4975	1.1214	2.16043	0.0032	0.0533879	no
Arl3	Arl3	-	chr19:46605598-46647575	P8_Ctrl	P8_KO	OK	28.4366	64.2196	1.17526	2.98903	5e-05	0.00269388	yes
Arsi	Arsi	-	chr18:61071893-61077422	P8_Ctrl	P8_KO	OK	3.99571	8.63347	1.11149	2.21791	0.0019	0.0383	yes
Atp5e	Atp5e	-	chr2:174286575-174289602	P8_Ctrl	P8_KO	OK	297.262	665.694	1.16313	3.62436	5e-05	0.00269388	yes
Atp5g2	Atp5g2	-	chr15:102493298-102501478	P8_Ctrl	P8_KO	OK	194.635	454.239	1.22268	4.03921	5e-05	0.00269388	yes
Atp5g3	Atp5g3	-	chr2:73746503-73749383	P8_Ctrl	P8_KO	OK	191.694	434.468	1.18045	3.93472	5e-05	0.00269388	yes
Atp5k	Atp5k	-	chr5:108862271-108863397	P8_Ctrl	P8_KO	OK	97.3161	537.159	2.4646	5.11593	5e-05	0.00269388	yes
Azin2	Azin2	-	chr4:128607476-128639699	P8_Ctrl	P8_KO	OK	4.49139	9.97692	1.15143	2.51214	0.001	0.0246751	yes
B3gnt8	B3gnt8	-	chr7:26412642-26414509	P8_Ctrl	P8_KO	OK	3.2856	7.21194	1.13423	2.14637	0.0046	0.0682753	no
B630019K06Rik	B630019K06Rik	-	chrX:8469478-8472090	P8_Ctrl	P8_KO	OK	14.0756	28.2045	1.00273	2.90434	5e-05	0.00269388	yes
Bcan	Bcan	-	chr3:87791452-87804278	P8_Ctrl	P8_KO	OK	34.9898	73.6979	1.07469	3.61662	5e-05	0.00269388	yes
Bcl3	Bcl3	-	chr7:20393810-20408104	P8_Ctrl	P8_KO	OK	3.59052	8.80401	1.29397	2.57217	0.00075	0.0203285	yes
Bcl7c	Bcl7c	-	chr7:134848491-134852280	P8_Ctrl	P8_KO	OK	40.9929	92.5463	1.1748	3.35848	5e-05	0.00269388	yes
Bok	Bok	-	chr1:95582270-95592339	P8_Ctrl	P8_KO	OK	73.342	183.334	1.32177	4.39261	5e-05	0.00269388	yes
C030006K11Rik	C030006K11Rik	-	chr15:76545705-76554275	P8_Ctrl	P8_KO	OK	3.35829	7.38606	1.13708	1.94673	0.0085	0.0996361	no
Cabp1	Cabp1	-	chr5:115618699-115636130	P8_Ctrl	P8_KO	OK	9.44482	25.4132	1.42798	3.199	5e-05	0.00269388	yes
Cbln4	Cbln4	-	chr2:171861835-171868966	P8_Ctrl	P8_KO	OK	6.4972	13.5604	1.06151	2.531	0.0005	0.0151357	yes
Cd74	Cd74	-	chr18:60963502-60972306	P8_Ctrl	P8_KO	OK	4.03248	9.62677	1.25539	2.22348	0.0029	0.0501888	no
Cdkn1a	Cdkn1a	-	chr17:29227930-29237667	P8_Ctrl	P8_KO	OK	2.15754	5.14581	1.25401	2.22025	0.00225	0.0426701	yes
Cebpa	Cebpa	-	chr7:35904311-35906951	P8_Ctrl	P8_KO	OK	7.39451	17.8705	1.27305	3.32155	5e-05	0.00269388	yes
Chchd10	Chchd10	-	chr10:75398317-75403417	P8_Ctrl	P8_KO	OK	190.62	470.067	1.30216	4.47765	5e-05	0.00269388	yes
Chst2	Chst2	-	chr9:95301344-95307689	P8_Ctrl	P8_KO	OK	3.46259	6.96316	1.00789	2.67283	0.0002	0.00777837	yes
Cited4	Cited4	-	chr4:120339167-120340425	P8_Ctrl	P8_KO	OK	4.70469	9.83308	1.06354	1.98129	0.00705	0.0884665	no
Cldn26	Cldn26	-	chr16:8409368-8425229	P8_Ctrl	P8_KO	OK	59.5603	121.108	1.02387	3.14473	5e-05	0.00269388	yes
Cldn5	Cldn5	-	chr16:18776939-18778355	P8_Ctrl	P8_KO	OK	7.40202	16.0574	1.11725	2.4577	0.00105	0.0253757	yes
Col26a1	Col26a1	-	chr5:137217633-137358977	P8_Ctrl	P8_KO	OK	7.21033	16.3456	1.18076	3.05179	5e-05	0.00269388	yes
Col9a2	Col9a2	-	chr4:120712170-120727930	P8_Ctrl	P8_KO	OK	8.35705	17.9273	1.1011	2.9428	0.0001	0.00461204	yes
Crip1	Crip1	-	chr12:114390222-114392090	P8_Ctrl	P8_KO	OK	26.53	53.2678	1.00564	1.92781	0.00805	0.0962177	no
Crlf1	Crlf1	-	chr8:73017054-73027980	P8_Ctrl	P8_KO	OK	4.71795	9.64351	1.0314	2.0943	0.0044	0.066483	no
Crlf2	Crlf2	-	chr5:109983727-109988012	P8_Ctrl	P8_KO	OK	7.68025	19.7054	1.35937	2.99624	5e-05	0.00269388	yes
Cxx1c	Cxx1c	-	chrX:50911098-50912311	P8_Ctrl	P8_KO	OK	9.51685	21.9925	1.20846	2.51006	0.0008	0.0211946	yes
D17Wsu104e	D17Wsu104e	-	chr17:56315963-56323343	P8_Ctrl	P8_KO	OK	29.4678	62.325	1.08067	2.83466	0.00015	0.00626232	yes
Dact3	Dact3	-	chr7:17460665-17472650	P8_Ctrl	P8_KO	OK	9.29685	21.3318	1.19819	3.29755	5e-05	0.00269388	yes
Dbp	Dbp	-	chr7:52960616-52973372	P8_Ctrl	P8_KO	OK	9.20555	25.9794	1.49679	2.00282	0.0069	0.0873934	no
Ddit4	Ddit4	-	chr10:59412422-59414518	P8_Ctrl	P8_KO	OK	31.1605	67.1413	1.10748	3.34053	5e-05	0.00269388	yes
Des	Des	-	chr1:75356866-75371590	P8_Ctrl	P8_KO	OK	7.48963	15.579	1.05663	2.82493	5e-05	0.00269388	yes
Dhh	Dhh	-	chr15:98723457-98728971	P8_Ctrl	P8_KO	OK	79.3428	159.515	1.00752	3.5296	5e-05	0.00269388	yes
Dlgap3	Dlgap3	-	chr4:126846447-126914266	P8_Ctrl	P8_KO	OK	3.44854	7.47596	1.11627	2.68282	0.0003	0.0103839	yes
Drd4	Drd4	-	chr7:148477904-148480900	P8_Ctrl	P8_KO	OK	10.9318	27.4079	1.32606	3.15318	5e-05	0.00269388	yes
Epn1	Epn1	-	chr7:5031836-5049780	P8_Ctrl	P8_KO	OK	40.8144	94.4029	1.20975	4.0408	5e-05	0.00269388	yes
Erf	Erf	-	chr7:26027578-26035777	P8_Ctrl	P8_KO	OK	10.3997	26.5633	1.35289	3.96715	5e-05	0.00269388	yes
Etd	Etd	-	chrX:50788094-50796753	P8_Ctrl	P8_KO	OK	79.3431	217.859	1.45721	3.85536	5e-05	0.00269388	yes
Etnk2	Etnk2	-	chr1:135260148-135276895	P8_Ctrl	P8_KO	OK	61.5005	140.688	1.19383	4.05712	5e-05	0.00269388	yes
Exosc6	Exosc6	-	chr8:113580238-113581564	P8_Ctrl	P8_KO	OK	7.84698	21.978	1.48585	3.29588	5e-05	0.00269388	yes
Fabp3	Fabp3	-	chr4:129986021-129992707	P8_Ctrl	P8_KO	OK	68.3505	162.257	1.24726	3.51993	5e-05	0.00269388	yes
Fam109a	Fam109a	-	chr5:122299036-122304608	P8_Ctrl	P8_KO	OK	3.70839	10.1087	1.44673	3.11589	5e-05	0.00269388	yes
Fam171a2	Fam171a2	-	chr11:102298295-102308977	P8_Ctrl	P8_KO	OK	2.60025	9.35773	1.84751	4.04663	5e-05	0.00269388	yes
Fam174a	Fam174a	-	chr1:97210204-97231861	P8_Ctrl	P8_KO	OK	10.0912	21.2032	1.07119	2.7851	0.00025	0.00908144	yes
Fam195a	Fam195a	-	chr17:26000642-26005683	P8_Ctrl	P8_KO	OK	20.5881	45.289	1.13735	2.67575	0.0004	0.0129783	yes
Fam19a5	Fam19a5	-	chr15:87374728-87589794	P8_Ctrl	P8_KO	OK	20.1415	41.0942	1.02877	3.13994	0.0001	0.00461204	yes
Fam222a	Fam222a	-	chr5:115018259-115063227	P8_Ctrl	P8_KO	OK	14.5545	30.8728	1.08487	3.19953	5e-05	0.00269388	yes
Fbxo17	Fbxo17	-	chr7:29501808-29523159	P8_Ctrl	P8_KO	OK	17.0703	34.2559	1.00487	2.84305	0.0001	0.00461204	yes
Fgf18	Fgf18	-	chr11:33016977-33047400	P8_Ctrl	P8_KO	OK	3.83628	7.79798	1.02339	1.89102	0.00735	0.0908081	no
Fkbp2	Fkbp2	-	chr19:7052228-7054951	P8_Ctrl	P8_KO	OK	33.4465	76.2264	1.18844	2.85142	0.0001	0.00461204	yes
Folr1	Folr1	-	chr7:109006844-109019302	P8_Ctrl	P8_KO	OK	26.3607	55.9689	1.08624	3.06192	5e-05	0.00269388	yes
Foxo6	Foxo6	-	chr4:119939682-119959866	P8_Ctrl	P8_KO	OK	13.6847	50.7393	1.89054	5.5351	5e-05	0.00269388	yes
Foxp4	Foxp4	-	chr17:48004081-48061581	P8_Ctrl	P8_KO	OK	22.5835	49.9136	1.14416	3.77052	5e-05	0.00269388	yes
Foxq1	Foxq1	-	chr13:31650038-31652843	P8_Ctrl	P8_KO	OK	5.84144	14.6163	1.32318	3.23457	5e-05	0.00269388	yes
Foxs1	Foxs1	-	chr2:152757633-152758944	P8_Ctrl	P8_KO	OK	17.1343	37.0347	1.11198	2.87981	5e-05	0.00269388	yes
Frat2	Frat2	-	chr19:41920464-41922622	P8_Ctrl	P8_KO	OK	2.64315	5.29948	1.00359	1.90698	0.00755	0.0926295	no
Fxyd1	Fxyd1	-	chr7:31836696-31840675	P8_Ctrl	P8_KO	OK	35.9336	83.1779	1.21087	2.86954	0.00015	0.00626232	yes
Fzd2	Fzd2	-	chr11:102465744-102469372	P8_Ctrl	P8_KO	OK	9.00597	18.9651	1.0744	3.05745	5e-05	0.00269388	yes
Fzd8	Fzd8	-	chr18:9212853-9216199	P8_Ctrl	P8_KO	OK	2.80342	5.93474	1.082	2.35735	0.0017	0.0356131	yes
G0s2	G0s2	-	chr1:195098353-195099382	P8_Ctrl	P8_KO	OK	9.34697	19.0526	1.02742	2.00364	0.00595	0.0805743	no
Gamt	Gamt	-	chr10:79720895-79723713	P8_Ctrl	P8_KO	OK	75.5911	157.065	1.05507	3.27319	5e-05	0.00269388	yes
Gipc1	Gipc1	-	chr8:86176576-86188688	P8_Ctrl	P8_KO	OK	18.1348	38.9942	1.1045	3.03631	5e-05	0.00269388	yes
Gltscr1	Gltscr1	-	chr7:16556610-16584844	P8_Ctrl	P8_KO	OK	2.68449	5.78751	1.1083	2.6932	0.0002	0.00777837	yes
Gm13889	Gm13889	-	chr2:93795966-93797257	P8_Ctrl	P8_KO	OK	2.25058	5.24243	1.21994	1.90097	0.00825	0.0980098	no
Gm1673	Gm1673	-	chr5:34326122-34327655	P8_Ctrl	P8_KO	OK	18.8181	72.4062	1.94399	3.42615	5e-05	0.00269388	yes
Gm1821	Gm1821	-	chr14:46703701-46704632	P8_Ctrl	P8_KO	OK	36.139	112.909	1.64353	4.27336	5e-05	0.00269388	yes
Gm53	Gm53	-	chr11:96112973-96125798	P8_Ctrl	P8_KO	OK	4.6036	13.0244	1.50038	2.16388	0.00655	0.0853535	no
Gnb2	Gnb2	-	chr5:137969356-137974457	P8_Ctrl	P8_KO	OK	140.096	290.597	1.0526	3.72681	5e-05	0.00269388	yes
Gpr27	Gpr27	-	chr6:99642672-99643812	P8_Ctrl	P8_KO	OK	1.19763	5.74914	2.26316	2.90055	0.00155	0.0332618	yes
Grasp	Grasp	-	chr15:101051621-101063187	P8_Ctrl	P8_KO	OK	4.7971	15.6281	1.70391	3.72225	5e-05	0.00269388	yes
H2afj	H2afj	-	chr6:136756768-136758595	P8_Ctrl	P8_KO	OK	9.5454	22.051	1.20796	3.03682	5e-05	0.00269388	yes
H2afx	H2afx	-	chr9:44142797-44144156	P8_Ctrl	P8_KO	OK	52.29	132.179	1.33788	4.2416	5e-05	0.00269388	yes
Hba-a2	Hba-a2	-	chr11:32196488-32197310	P8_Ctrl	P8_KO	OK	370.304	1615.13	2.12486	7.27054	5e-05	0.00269388	yes
Hbb-b1	Hbb-b1	-	chr7:110975036-110976443	P8_Ctrl	P8_KO	OK	267.694	936.156	1.80617	3.21839	5e-05	0.00269388	yes
Hbb-bs	Hbb-bs	-	chr7:110975036-110976443	P8_Ctrl	P8_KO	OK	158.644	782.863	2.30296	3.10462	5e-05	0.00269388	yes
Hbb-bt	Hbb-bt	-	chr7:110961037-110962437	P8_Ctrl	P8_KO	OK	265.817	932.792	1.81112	6.17279	5e-05	0.00269388	yes
Hddc3	Hddc3	-	chr7:87488022-87490983	P8_Ctrl	P8_KO	OK	3.29566	10.378	1.65489	2.49612	0.0009	0.0230803	yes
Hic1	Hic1	-	chr11:74978066-74983757	P8_Ctrl	P8_KO	OK	6.97085	19.3237	1.47097	4.01236	5e-05	0.00269388	yes
Hist1h4i	Hist1h4i	-	chr13:22132828-22133231	P8_Ctrl	P8_KO	OK	5.18374	18.084	1.80265	2.05187	0.0096	0.107522	no
Hnrnpa0	Hnrnpa0	-	chr13:58227239-58229917	P8_Ctrl	P8_KO	OK	138.102	288.206	1.06137	3.82876	5e-05	0.00269388	yes
Hoxd9	Hoxd9	-	chr2:74535819-74538265	P8_Ctrl	P8_KO	OK	14.512	41.6407	1.52075	4.34823	5e-05	0.00269388	yes
Hsd17b1	Hsd17b1	-	chr11:100939724-100941819	P8_Ctrl	P8_KO	OK	27.5085	72.6808	1.4017	4.02866	5e-05	0.00269388	yes
Hspb1	Hspb1	-	chr5:136363788-136365433	P8_Ctrl	P8_KO	OK	197.691	413.777	1.06561	3.65188	5e-05	0.00269388	yes
Hypk	Hypk	-	chr2:121282823-121284176	P8_Ctrl	P8_KO	OK	39.2405	102.252	1.38171	3.44063	5e-05	0.00269388	yes
Id3	Id3	-	chr4:135699736-135701307	P8_Ctrl	P8_KO	OK	67.7253	162.046	1.25864	3.88941	5e-05	0.00269388	yes
Ier5	Ier5	-	chr1:156943496-156946766	P8_Ctrl	P8_KO	OK	7.65214	16.2135	1.08326	2.94556	0.0001	0.00461204	yes
Ier5l	Ier5l	-	chr2:30328160-30329719	P8_Ctrl	P8_KO	OK	9.11212	28.0684	1.62309	3.84729	5e-05	0.00269388	yes
Ifitm2	Ifitm2	-	chr7:148140737-148141860	P8_Ctrl	P8_KO	OK	132.258	296.846	1.16636	3.60503	5e-05	0.00269388	yes
Igfbp7	Igfbp7	-	chr5:77739508-77837070	P8_Ctrl	P8_KO	OK	233.858	521.521	1.15709	3.16146	5e-05	0.00269388	yes
Inafm1	Inafm1	-	chr7:16857361-16859041	P8_Ctrl	P8_KO	OK	7.36458	18.9139	1.36077	3.16128	5e-05	0.00269388	yes
Inha	Inha	-	chr1:75503651-75506929	P8_Ctrl	P8_KO	OK	350.764	765.171	1.12528	4.07375	5e-05	0.00269388	yes
Insl3	Insl3	-	chr8:74200281-74214476	P8_Ctrl	P8_KO	OK	205.944	420.184	1.02877	3.25863	5e-05	0.00269388	yes
Junb	Junb	-	chr8:87500807-87502647	P8_Ctrl	P8_KO	OK	2.36592	8.28885	1.80877	3.21802	5e-05	0.00269388	yes
Jund	Jund	-	chr8:73221637-73224515	P8_Ctrl	P8_KO	OK	102.869	240.994	1.22818	4.36967	5e-05	0.00269388	yes
Kazald1	Kazald1	-	chr19:45150628-45153779	P8_Ctrl	P8_KO	OK	55.7845	158.846	1.50969	4.88437	5e-05	0.00269388	yes
Kcne1l	Kcne1l	-	chrX:138739295-138740741	P8_Ctrl	P8_KO	OK	1.83345	5.31319	1.53502	2.41437	0.00165	0.0347724	yes
Kcng2	Kcng2	-	chr18:80491282-80560993	P8_Ctrl	P8_KO	OK	16.3599	40.4243	1.30505	3.97045	5e-05	0.00269388	yes
Kcnmb4	Kcnmb4	-	chr10:115854923-115910579	P8_Ctrl	P8_KO	OK	7.49999	21.3681	1.5105	3.00945	5e-05	0.00269388	yes
Kctd17	Kctd17	-	chr15:78258993-78269733	P8_Ctrl	P8_KO	OK	9.95722	20.8008	1.06282	2.55441	0.0004	0.0129783	yes
Klf2	Klf2	-	chr8:74842960-74845553	P8_Ctrl	P8_KO	OK	7.14282	14.4186	1.01337	2.30263	0.00245	0.0452454	yes
Krt18	Krt18	-	chr15:101858646-101862457	P8_Ctrl	P8_KO	OK	4.14228	10.063	1.28057	2.26876	0.00285	0.049665	yes
Krt8	Krt8	-	chr15:101827141-101834773	P8_Ctrl	P8_KO	OK	3.10412	9.07015	1.54694	2.85614	0.00035	0.0116565	yes
Lgals7	Lgals7	-	chr7:29649404-29651303	P8_Ctrl	P8_KO	OK	49.1773	102.042	1.05309	2.68029	0.0002	0.00777837	yes
Lppr2	Lppr2	-	chr9:21741453-21753351	P8_Ctrl	P8_KO	OK	2.69149	5.83982	1.11752	2.28113	0.00195	0.0389514	yes
Lrfn4	Lrfn4	-	chr19:4510471-4621752	P8_Ctrl	P8_KO	OK	7.93081	18.5277	1.22414	2.07135	0.0062	0.082129	no
Lypla2	Lypla2	-	chr4:135524139-135528509	P8_Ctrl	P8_KO	OK	16.8863	35.7331	1.08141	2.91937	0.0001	0.00461204	yes
Mafa	Mafa	-	chr15:75577272-75578352	P8_Ctrl	P8_KO	OK	24.7529	50.7004	1.0344	2.7396	0.0002	0.00777837	yes
Mafb	Mafb	-	chr2:160189412-160192801	P8_Ctrl	P8_KO	OK	5.92783	12.2805	1.05079	2.72845	0.00015	0.00626232	yes
Map1lc3a	Map1lc3a	-	chr2:155102099-155103809	P8_Ctrl	P8_KO	OK	34.5039	79.5176	1.20452	3.37819	5e-05	0.00269388	yes
Map3k10	Map3k10	-	chr7:28441393-28459600	P8_Ctrl	P8_KO	OK	8.83338	20.032	1.18127	3.37132	5e-05	0.00269388	yes
Mdfi	Mdfi	-	chr17:47952276-47971640	P8_Ctrl	P8_KO	OK	6.53868	21.0561	1.68717	3.77404	5e-05	0.00269388	yes
Mesdc1	Mesdc1	-	chr7:91029004-91032851	P8_Ctrl	P8_KO	OK	19.4652	41.3892	1.08836	3.51564	5e-05	0.00269388	yes
Mfap2	Mfap2	-	chr4:140566338-140571899	P8_Ctrl	P8_KO	OK	52.2746	133.688	1.35468	4.15989	5e-05	0.00269388	yes
Mgp	Mgp	-	chr6:136820955-136824326	P8_Ctrl	P8_KO	OK	110.032	254.136	1.20768	3.58658	5e-05	0.00269388	yes
Mgst3	Mgst3	-	chr1:169302514-169323928	P8_Ctrl	P8_KO	OK	29.3019	61.1378	1.06107	2.43507	0.0007	0.0193301	yes
Miox	Miox	-	chr15:89164903-89167438	P8_Ctrl	P8_KO	OK	1.96492	6.51823	1.73001	2.36916	0.00285	0.049665	yes
Mmp11	Mmp11	-	chr10:75385968-75395208	P8_Ctrl	P8_KO	OK	38.0025	83.1947	1.1304	3.68888	5e-05	0.00269388	yes
Mocs3	Mocs3	-	chr2:168056121-168057803	P8_Ctrl	P8_KO	OK	4.74319	10.2457	1.11108	2.29049	0.00115	0.0269783	yes
Mxra7	Mxra7	-	chr11:116664713-116689360	P8_Ctrl	P8_KO	OK	23.9938	48.7985	1.02417	3.01527	5e-05	0.00269388	yes
Naglu	Naglu	-	chr11:100931407-100938985	P8_Ctrl	P8_KO	OK	11.3875	22.8736	1.00623	2.78135	0.00045	0.0139334	yes
Ndufa12	Ndufa12	-	chr10:93661753-93683693	P8_Ctrl	P8_KO	OK	59.1494	123.067	1.057	2.74954	0.00025	0.00908144	yes
Ndufa3	Ndufa3	-	chr7:3568974-3571763	P8_Ctrl	P8_KO	OK	194.033	391.551	1.0129	2.65918	0.00015	0.00626232	yes
Ndufb11	Ndufb11	-	chrX:20192451-20228031	P8_Ctrl	P8_KO	OK	63.4357	130.861	1.04467	1.98523	0.0044	0.066483	no
Nenf	Nenf	-	chr1:193130675-193141997	P8_Ctrl	P8_KO	OK	107.008	241.531	1.17449	3.58695	5e-05	0.00269388	yes
Ngfrap1	Ngfrap1	-	chrX:132804791-132806517	P8_Ctrl	P8_KO	OK	69.6255	220.568	1.66353	5.20425	5e-05	0.00269388	yes
Ninj1	Ninj1	-	chr13:49282915-49291620	P8_Ctrl	P8_KO	OK	25.1525	52.925	1.07325	2.87439	5e-05	0.00269388	yes
Nnat	Nnat	-	chr2:157382097-157392097	P8_Ctrl	P8_KO	OK	15.0248	41.7966	1.47604	2.56446	0.0014	0.0310254	yes
Nupr1l	Nupr1l	-	chr5:130384409-130387151	P8_Ctrl	P8_KO	OK	5.01497	13.8638	1.46701	2.19949	0.00295	0.0507055	no
Nxph3	Nxph3	-	chr11:95371159-95375879	P8_Ctrl	P8_KO	OK	2.43367	5.26865	1.1143	2.0701	0.0051	0.0731692	no
Ogfod2	Ogfod2	-	chr5:124562346-124565485	P8_Ctrl	P8_KO	OK	3.87596	8.20772	1.08243	2.03629	0.0048	0.0700633	no
Ormdl3	Ormdl3	-	chr11:98442607-98448559	P8_Ctrl	P8_KO	OK	58.4157	126.333	1.1128	3.73389	5e-05	0.00269388	yes
Osr2	Osr2	-	chr15:35225866-35233060	P8_Ctrl	P8_KO	OK	35.8763	81.3316	1.18079	3.68413	5e-05	0.00269388	yes
Pfdn2	Pfdn2	-	chr1:173275829-173288301	P8_Ctrl	P8_KO	OK	37.539	79.4388	1.08145	2.65437	0.0003	0.0103839	yes
Pink1	Pink1	-	chr4:137869324-137882211	P8_Ctrl	P8_KO	OK	46.0395	94.9402	1.04415	3.51149	5e-05	0.00269388	yes
Plekhh3	Plekhh3	-	chr11:101023992-101032616	P8_Ctrl	P8_KO	OK	8.31598	21.1546	1.34702	3.68584	5e-05	0.00269388	yes
Pmvk	Pmvk	-	chr3:89263039-89272931	P8_Ctrl	P8_KO	OK	4.32625	9.31066	1.10577	2.00139	0.0063	0.0831411	no
Pold4	Pold4	-	chr19:4231898-4233634	P8_Ctrl	P8_KO	OK	6.09218	14.7349	1.27421	2.33661	0.00215	0.0413072	yes
Polr2j	Polr2j	-	chr5:136592560-136598817	P8_Ctrl	P8_KO	OK	39.3938	89.8543	1.18962	2.90751	0.0002	0.00777837	yes
Ppap2c	Ppap2c	-	chr10:78989168-78996532	P8_Ctrl	P8_KO	OK	2.41574	6.1784	1.35477	2.31767	0.0014	0.0310254	yes
Ppp1r14b	Ppp1r14b	-	chr19:7049537-7051814	P8_Ctrl	P8_KO	OK	48.3384	110.078	1.18728	3.4503	5e-05	0.00269388	yes
Ppp1r1b	Ppp1r1b	-	chr11:98210051-98219597	P8_Ctrl	P8_KO	OK	5.53705	11.3853	1.03998	2.19369	0.00245	0.0452454	yes
Ppp1r3e	Ppp1r3e	-	chr14:55494433-55496375	P8_Ctrl	P8_KO	OK	2.5806	6.95365	1.43007	2.6385	0.0004	0.0129783	yes
Prr13	Prr13	-	chr15:102289600-102293237	P8_Ctrl	P8_KO	OK	15.0552	37.4647	1.31527	3.24405	0.0001	0.00461204	yes
Prrg2	Prrg2	-	chr7:52308976-52317022	P8_Ctrl	P8_KO	OK	5.18435	12.9255	1.31798	2.60548	0.0008	0.0211946	yes
Prrx2	Prrx2	-	chr2:30700886-30736767	P8_Ctrl	P8_KO	OK	12.7277	34.8029	1.45123	3.35701	5e-05	0.00269388	yes
Ptms	Ptms	-	chr6:124863692-124867964	P8_Ctrl	P8_KO	OK	158.426	547.141	1.7881	6.21062	5e-05	0.00269388	yes
Rabac1	Rabac1	-	chr7:25754768-25757747	P8_Ctrl	P8_KO	OK	74.3851	150.091	1.01275	3.09062	5e-05	0.00269388	yes
Rhoc	Rhoc	-	chr3:104591951-104597377	P8_Ctrl	P8_KO	OK	42.5829	97.6704	1.19765	3.5393	5e-05	0.00269388	yes
Rita1	Rita1	-	chr5:121059068-121062598	P8_Ctrl	P8_KO	OK	2.69984	8.10929	1.5867	2.84169	0.00055	0.0162855	yes
Rnaseh2c	Rnaseh2c	-	chr19:5601872-5602959	P8_Ctrl	P8_KO	OK	26.2527	74.1534	1.49805	3.51387	5e-05	0.00269388	yes
Rpl22l1	Rpl22l1	-	chr3:28704432-28706337	P8_Ctrl	P8_KO	OK	153.355	358.537	1.22525	3.62674	5e-05	0.00269388	yes
Rpl28	Rpl28	-	chr7:4744566-4746149	P8_Ctrl	P8_KO	OK	717.202	1788.39	1.31821	4.66042	5e-05	0.00269388	yes
Rtn2	Rtn2	-	chr7:19867972-19881513	P8_Ctrl	P8_KO	OK	6.61147	16.3538	1.30659	2.59229	0.0007	0.0193301	yes
S100a1	S100a1	-	chr3:90314955-90318252	P8_Ctrl	P8_KO	OK	10.5039	23.7097	1.17455	2.10104	0.00425	0.0653943	no
Scand1	Scand1	-	chr2:156137581-156201374	P8_Ctrl	P8_KO	OK	18.0828	97.9561	2.43752	5.62162	5e-05	0.00269388	yes
Scx	Scx	-	chr15:76210942-76307699	P8_Ctrl	P8_KO	OK	33.8209	96.0691	1.50616	2.39279	0.0022	0.0419476	yes
Sec61g	Sec61g	-	chr11:16401640-16408487	P8_Ctrl	P8_KO	OK	55.888	116.36	1.05798	2.98301	0.0001	0.00461204	yes
Sema6c	Sema6c	-	chr3:94964341-94977972	P8_Ctrl	P8_KO	OK	61.3508	156.978	1.35541	4.73829	5e-05	0.00269388	yes
Sf3a2	Sf3a2	-	chr10:80261479-80267667	P8_Ctrl	P8_KO	OK	26.6533	53.7781	1.01271	3.00527	0.00015	0.00626232	yes
Sf3b5	Sf3b5	-	chr10:12728255-12728989	P8_Ctrl	P8_KO	OK	72.4855	149.64	1.04573	3.06481	5e-05	0.00269388	yes
Sfn	Sfn	-	chr4:133156470-133158083	P8_Ctrl	P8_KO	OK	5.58753	15.6755	1.48823	3.23892	5e-05	0.00269388	yes
Sh3bgr	Sh3bgr	-	chr16:96422076-96450540	P8_Ctrl	P8_KO	OK	13.4345	27.0441	1.00937	2.47518	0.00045	0.0139334	yes
Shisa4	Shisa4	-	chr1:137268032-137271640	P8_Ctrl	P8_KO	OK	5.36184	10.9564	1.03097	1.94454	0.00855	0.100023	no
Shisa8	Shisa8	-	chr15:82037381-82043245	P8_Ctrl	P8_KO	OK	63.5472	147.639	1.21617	4.03475	5e-05	0.00269388	yes
Six5	Six5	-	chr7:19679892-19683694	P8_Ctrl	P8_KO	OK	6.6773	18.0886	1.43775	3.73983	5e-05	0.00269388	yes
Slc16a3	Slc16a3	-	chr11:120809797-120820314	P8_Ctrl	P8_KO	OK	20.7381	41.5203	1.00153	3.0521	0.0001	0.00461204	yes
Slc22a17	Slc22a17	-	chr14:55525563-55531969	P8_Ctrl	P8_KO	OK	29.8133	61.7998	1.05165	3.34697	5e-05	0.00269388	yes
Slc27a3	Slc27a3	-	chr3:90189154-90193849	P8_Ctrl	P8_KO	OK	22.9686	50.4057	1.13393	3.47044	5e-05	0.00269388	yes
Slc39a8	Slc39a8	-	chr3:135488242-135551536	P8_Ctrl	P8_KO	OK	2.10726	5.5202	1.38935	2.85954	0.00015	0.00626232	yes
Smad6	Smad6	-	chr9:63800882-63869866	P8_Ctrl	P8_KO	OK	5.42973	13.9026	1.3564	3.3609	5e-05	0.00269388	yes
Smad7	Smad7	-	chr18:75527018-75555588	P8_Ctrl	P8_KO	OK	14.7963	30.9199	1.06331	3.39334	5e-05	0.00269388	yes
Snrpd2	Snrpd2	-	chr7:19735186-19738075	P8_Ctrl	P8_KO	OK	194.299	413.729	1.0904	3.34488	5e-05	0.00269388	yes
Snx21	Snx21	-	chr2:164611520-164630381	P8_Ctrl	P8_KO	OK	14.7789	31.7175	1.10174	2.68312	0.0004	0.0129783	yes
Sox18	Sox18	-	chr2:181404541-181406345	P8_Ctrl	P8_KO	OK	19.9096	47.7259	1.26131	3.55687	5e-05	0.00269388	yes
Spata21	Spata21	-	chr4:140644259-140668674	P8_Ctrl	P8_KO	OK	4.9942	10.7787	1.10986	2.59138	0.00045	0.0139334	yes
Ssbp4	Ssbp4	-	chr8:73121388-73132213	P8_Ctrl	P8_KO	OK	20.2562	52.5998	1.37669	3.8325	5e-05	0.00269388	yes
Stx1a	Stx1a	-	chr5:135499441-135526969	P8_Ctrl	P8_KO	OK	9.62296	21.897	1.18618	3.07826	5e-05	0.00269388	yes
Tbca	Tbca	-	chr13:95558897-95612854	P8_Ctrl	P8_KO	OK	158.553	345.34	1.12306	3.37442	5e-05	0.00269388	yes
Tbkbp1	Tbkbp1	-	chr11:96997484-97011026	P8_Ctrl	P8_KO	OK	2.9309	6.06725	1.0497	2.2979	0.0018	0.0367467	yes
Tbx2	Tbx2	-	chr11:85646116-85655450	P8_Ctrl	P8_KO	OK	12.088	28.0277	1.21328	3.60867	5e-05	0.00269388	yes
Tceal3	Tceal3	-	chrX:133200913-133202916	P8_Ctrl	P8_KO	OK	5.67309	11.9748	1.07779	2.02725	0.00555	0.0771135	no
Tesk1	Tesk1	-	chr4:43455148-43467498	P8_Ctrl	P8_KO	OK	12.9476	28.2827	1.12723	3.37482	5e-05	0.00269388	yes
Timm13	Timm13	-	chr10:80342560-80363714	P8_Ctrl	P8_KO	OK	19.5608	41.2319	1.07579	2.78424	5e-05	0.00269388	yes
Tmem158	Tmem158	-	chr9:123168174-123169907	P8_Ctrl	P8_KO	OK	3.50751	11.1044	1.66262	3.3352	5e-05	0.00269388	yes
Tmem160	Tmem160	-	chr7:17038127-17040839	P8_Ctrl	P8_KO	OK	7.6774	20.457	1.4139	2.67496	0.00055	0.0162855	yes
Tmem200b	Tmem200b	-	chr4:131477685-131479055	P8_Ctrl	P8_KO	OK	46.5359	96.1446	1.04686	3.26575	5e-05	0.00269388	yes
Tmem205	Tmem205	-	chr9:21725452-21740316	P8_Ctrl	P8_KO	OK	14.084	32.9192	1.22487	2.52318	0.001	0.0246751	yes
Tmem238	Tmem238	-	chr7:4736386-4741162	P8_Ctrl	P8_KO	OK	2.80157	10.5667	1.91521	3.04243	0.00015	0.00626232	yes
Tmem258	Tmem258	-	chr19:10278691-10282314	P8_Ctrl	P8_KO	OK	77.2759	188.23	1.28441	3.10828	5e-05	0.00269388	yes
Tmem259	Tmem259	-	chr10:79433468-79447075	P8_Ctrl	P8_KO	OK	33.3143	70.7208	1.08599	3.47956	5e-05	0.00269388	yes
Tmem42	Tmem42	-	chr9:122930443-122932609	P8_Ctrl	P8_KO	OK	6.50938	15.5407	1.25546	2.10559	0.00235	0.0440919	yes
Tmem52	Tmem52	-	chr4:154843222-154844967	P8_Ctrl	P8_KO	OK	5.31817	13.0619	1.29636	2.36184	0.00155	0.0332618	yes
Tmsb10	Tmsb10	-	chr6:72907340-72908742	P8_Ctrl	P8_KO	OK	292.251	686.876	1.23284	4.08301	5e-05	0.00269388	yes
Tnfrsf12a	Tnfrsf12a	-	chr17:23797489-23814416	P8_Ctrl	P8_KO	OK	40.3391	90.6427	1.16801	2.65042	0.0005	0.0151357	yes
Tpgs1	Tpgs1	-	chr10:79132154-79138871	P8_Ctrl	P8_KO	OK	15.5891	31.5921	1.01903	2.44205	0.0005	0.0151357	yes
Trappc6a	Trappc6a	-	chr7:20094077-20101494	P8_Ctrl	P8_KO	OK	10.9754	27.4358	1.32179	2.64199	0.0006	0.0173008	yes
Trem2	Trem2	-	chr17:48485725-48491601	P8_Ctrl	P8_KO	OK	2.62131	6.61011	1.33438	2.08231	0.0057	0.0786395	no
Trim47	Trim47	-	chr11:115967063-115971549	P8_Ctrl	P8_KO	OK	43.4717	96.6173	1.15221	3.8335	5e-05	0.00269388	yes
Tsen34	Tsen34	-	chr7:3645211-3652637	P8_Ctrl	P8_KO	OK	40.144	94.0714	1.22857	3.74345	5e-05	0.00269388	yes
Tspo	Tspo	-	chr15:83394002-83404633	P8_Ctrl	P8_KO	OK	17.2649	46.5118	1.42976	3.35183	5e-05	0.00269388	yes
Tst	Tst	-	chr15:78229985-78236289	P8_Ctrl	P8_KO	OK	50.9808	115.366	1.1782	3.56928	5e-05	0.00269388	yes
Tusc1	Tusc1	-	chr4:93000838-93002202	P8_Ctrl	P8_KO	OK	8.25701	31.5407	1.93353	4.51193	5e-05	0.00269388	yes
Tyrobp	Tyrobp	-	chr7:31198806-31202598	P8_Ctrl	P8_KO	OK	11.4333	25.8856	1.1789	2.06241	0.00455	0.0678189	no
Unc93b1	Unc93b1	-	chr19:3935185-3949340	P8_Ctrl	P8_KO	OK	6.33133	12.7637	1.01147	2.42727	0.00115	0.0269783	yes
Vps37d	Vps37d	-	chr5:135548769-135554136	P8_Ctrl	P8_KO	OK	5.80059	12.5757	1.11637	2.34912	0.0014	0.0310254	yes
Wbp2	Wbp2	-	chr11:115939886-115948278	P8_Ctrl	P8_KO	OK	39.4921	80.1199	1.0206	3.24633	5e-05	0.00269388	yes
Wtip	Wtip	-	chr7:34894566-34918287	P8_Ctrl	P8_KO	OK	11.8464	27.9569	1.23875	3.29862	5e-05	0.00269388	yes
Zbtb7b	Zbtb7b	-	chr3:89181567-89202701	P8_Ctrl	P8_KO	OK	4.41564	9.96221	1.17384	2.85166	0.0001	0.00461204	yes
Zfp385a	Zfp385a	-	chr15:103144325-103170517	P8_Ctrl	P8_KO	OK	9.22306	18.568	1.0095	2.61315	0.00055	0.0162855	yes
Zfp444	Zfp444	-	chr7:6124114-6144706	P8_Ctrl	P8_KO	OK	3.70799	9.70468	1.38804	3.49934	5e-05	0.00269388	yes
Zfp503	Zfp503	-	chr14:22803183-22808823	P8_Ctrl	P8_KO	OK	3.52137	7.40134	1.07165	2.61668	0.00045	0.0139334	yes
Zfp524	Zfp524	-	chr7:4967109-4970090	P8_Ctrl	P8_KO	OK	2.5639	7.98597	1.63913	2.55368	0.0015	0.0325857	yes
Zfp703	Zfp703	-	chr8:28087807-28091934	P8_Ctrl	P8_KO	OK	11.4913	31.4155	1.45093	4.28769	5e-05	0.00269388	yes
Zfp768	Zfp768	-	chr7:134486308-134488828	P8_Ctrl	P8_KO	OK	6.1787	15.4365	1.32097	3.18926	5e-05	0.00269388	yes
Zfp771	Zfp771	-	chr7:134388039-134398315	P8_Ctrl	P8_KO	OK	20.1962	54.2505	1.42555	3.74462	5e-05	0.00269388	yes
Zfpl1	Zfpl1	-	chr19:6080037-6084891	P8_Ctrl	P8_KO	OK	11.9808	28.0414	1.22683	2.90775	0.00015	0.00626232	yes
Zfpm1	Zfpm1	-	chr8:124806040-124861147	P8_Ctrl	P8_KO	OK	26.6799	65.4262	1.29411	4.27576	5e-05	0.00269388	yes

## Sheet: Figure 4B
P6-specific			P6 and P8 common			P8-specific			GO analysis of 57 common genes
2010107G23Rik			AV320801			gene_id			Category	Term	Count	%	PValue	Genes	List Total	Pop Hits	Pop Total	Fold Enrichment	Bonferroni	Benjamini	FDR
Afp			Aifm3			Ccnb1ip1			GOTERM_BP_DIRECT	GO:0051321~meiotic cell cycle	14	24.5614	8.65169e-20	PIWIL2, DDX4, SYCP1, TEX11, TDRD9, TEX15, SMC1B, TDRD1, STRA8, SYCE1, STAG3, MAEL, MOV10L1, HORMAD1	47	95	18082	56.6961	2.31865e-17	2.31865e-17	2.21483e-17
Ak4			Arl14epl			Figla			GOTERM_BP_DIRECT	GO:0007283~spermatogenesis	19	33.3333	2.31979e-18	PIWIL2, TDRKH, DDX4, DDX25, SYCP1, TDRD9, TEX15, TDRD5, TAF7L, TDRD1, DAZL, UBA1Y, STRA8, RNF17, MAEL, MOV10L1, HORMAD1, MORC1, TCFL5	47	407	18082	17.9601	6.21703e-16	3.10852e-16	2.96933e-16
Aldoc			Ccdc88c			Rad54b			GOTERM_BP_DIRECT	GO:0043046~DNA methylation involved in gamete generation	9	15.7895	3.95062e-17	PIWIL2, TDRD1, TDRKH, DDX4, TDRD9, MAEL, MOV10L1, MORC1, TDRD5	47	18	18082	192.362	1.05876e-14	3.52922e-15	3.37119e-15
Asb9			Cecr2			Lmo1			GOTERM_BP_DIRECT	GO:0007140~male meiosis	8	14.0351	4.86301e-13	TDRKH, DDX4, TEX11, TDRD9, MAEL, MOV10L1, TEX14, TEX15	47	28	18082	109.921	1.30322e-10	3.25822e-11	3.11233e-11
Asz1			Dazl			AU022751			GOTERM_BP_DIRECT	GO:0031047~gene silencing by RNA	8	14.0351	6.03836e-11	PIWIL2, TDRD1, TDRKH, LIN28A, DDX4, TDRD9, MAEL, MOV10L1	47	53	18082	58.0715	1.61828e-08	3.23656e-09	3.09164e-09
Cdkn2a			Ddx25			Adad1			GOTERM_BP_DIRECT	GO:0034587~piRNA metabolic process	7	12.2807	8.78116e-11	PIWIL2, TDRD1, TDRKH, DDX4, TDRD9, MAEL, MOV10L1	47	29	18082	92.8643	2.35335e-08	3.92225e-09	3.74663e-09
Coprs			Ddx4			Gnat2			GOTERM_BP_DIRECT	GO:0030154~cell differentiation	16	28.0702	4.27678e-10	PIWIL2, TDRKH, DDX4, DDX25, TDRD9, TEX15, TDRD5, TAF7L, TDRD1, DAZL, STRA8, RNF17, MAEL, MOV10L1, HORMAD1, MORC1	47	780	18082	7.89176	1.14618e-07	1.6374e-08	1.56408e-08
Cox7b2			Dnmt3b			Dpep3			GOTERM_BP_DIRECT	GO:0007130~synaptonemal complex assembly	6	10.5263	1.68092e-09	SYCE1, SYCP1, TEX11, TEX12, HORMAD1, TEX15	47	21	18082	109.921	4.50486e-07	5.63107e-08	5.37894e-08
Crabp1			Elavl2			Ica1			GOTERM_BP_DIRECT	GO:0007129~synapsis	6	10.5263	1.15729e-08	STRA8, STAG3, SYCP1, MAEL, HORMAD1, TEX15	47	30	18082	76.9447	3.10154e-06	3.44616e-07	3.29185e-07
Cyct			Esrp1			Tspan33			GOTERM_BP_DIRECT	GO:0009566~fertilization	6	10.5263	1.49392e-07	TDRKH, STRA8, TEX11, TDRD9, MAEL, TEX15	47	49	18082	47.109	4.00362e-05	4.0037e-06	3.82443e-06
Dgat2			Foxf1			Ropn1l			GOTERM_BP_DIRECT	GO:0007275~multicellular organism development	12	21.0526	4.0668e-05	PIWIL2, TAF7L, TDRD1, DAZL, DDX4, DDX25, TDRD9, RNF17, MAEL, MOV10L1, MORC1, TDRD5	47	1029	18082	4.48657	0.0108401	0.00099082	0.000946455
Dmrtb1			Gm15107			Fam208b			GOTERM_BP_DIRECT	GO:0007286~spermatid development	6	10.5263	5.21069e-05	XLR5B, TAF7L, XLR5A, DDX25, RNF17, TDRD5	47	160	18082	14.4271	0.013868	0.00116372	0.00111161
Dnd1			Gm41			Gm10439			GOTERM_BP_DIRECT	GO:0048477~oogenesis	4	7.01754	8.72443e-05	PIWIL2, DAZL, STRA8, HORMAD1	47	34	18082	45.2616	0.0231112	0.00179857	0.00171804
Dppa5a			Gm6880			Pisd-ps2			GOTERM_BP_DIRECT	GO:0007281~germ cell development	4	7.01754	0.000142515	TDRD1, DAZL, LIN28A, MOV10L1	47	40	18082	38.4723	0.0374766	0.00272815	0.002606
Dusp9			Gm7903			Bin2			GOTERM_BP_DIRECT	GO:0007131~reciprocal meiotic recombination	3	5.26316	0.00229454	STRA8, SYCP1, TEX11	47	28	18082	41.2204	0.459707	0.0409958	0.0391602
Egr4			Gpat2			Rhox13			GOTERM_BP_DIRECT	GO:0048133~male germ-line stem cell asymmetric division	2	3.50877	0.0101379	STRA8, ZBTB16	47	4	18082	192.362	0.934835	0.150943	0.144184
Epb4.1l4b			Hormad1			Ddx43			GOTERM_BP_DIRECT	GO:0000711~meiotic DNA repair synthesis	2	3.50877	0.0101379	SYCP1, TEX12	47	4	18082	192.362	0.934835	0.150943	0.144184
Epcam			Lin28a			Fam178b			GOTERM_BP_DIRECT	GO:0007066~female meiosis sister chromatid cohesion	2	3.50877	0.0101379	STRA8, STAG3	47	4	18082	192.362	0.934835	0.150943	0.144184
Fkbp6			Mael			Dapk2			GOTERM_BP_DIRECT	GO:0032880~regulation of protein localization	3	5.26316	0.012247	DDX4, SYCP1, TEX15	47	66	18082	17.4874	0.963208	0.161523	0.154291
Foxc2			Morc1			Nanos1			GOTERM_BP_DIRECT	GO:0034502~protein localization to chromosome	2	3.50877	0.0126567	STAG3, TEX15	47	5	18082	153.889	0.967079	0.161523	0.154291
Fsd1			Mov10l1			Plekhg4			GOTERM_BP_DIRECT	GO:0042138~meiotic DNA double-strand break formation	2	3.50877	0.0126567	STRA8, HORMAD1	47	5	18082	153.889	0.967079	0.161523	0.154291
Gcat			Nlrp4c			Boll			GOTERM_BP_DIRECT	GO:0051026~chiasma assembly	2	3.50877	0.0201753	SYCP1, TEX11	47	8	18082	96.1809	0.995756	0.245772	0.234767
Gfra1			Nxf2			Prss50			GOTERM_BP_DIRECT	GO:0051123~RNA polymerase II transcriptional preinitiation complex assembly	2	3.50877	0.0226691	TAF7L, TAF9B	47	9	18082	85.4941	0.997856	0.264144	0.252316
Glis3			Pcgf5			Ccdc36			GOTERM_BP_DIRECT	GO:0046620~regulation of organ growth	2	3.50877	0.0251566	STRA8, MAEL	47	10	18082	76.9447	0.998917	0.280915	0.268337
Gm10352			Piwil2			Sycp3			GOTERM_BP_DIRECT	GO:0097194~execution phase of apoptosis	2	3.50877	0.0325821	CECR2, AIFM3	47	13	18082	59.1882	0.99986	0.34928	0.333641
Gm14458			Rbm44			Bnc1			GOTERM_BP_DIRECT	GO:0000122~negative regulation of transcription from RNA polymerase II promoter	6	10.5263	0.0368913	FOXF1, SALL4, ZBTB16, DNMT3B, MAEL, TAF9B	47	729	18082	3.16645	0.999958	0.376802	0.359931
Gm14511			Rnf17			Ccdc138			GOTERM_BP_DIRECT	GO:0006417~regulation of translation	3	5.26316	0.0379614	PIWIL2, DAZL, DDX25	47	121	18082	9.5386	0.999969	0.376802	0.359931
Gm15093			Sall4			Map7d2			GOTERM_BP_DIRECT	GO:0007141~male meiosis I	2	3.50877	0.0472675	DDX4, MOV10L1	47	19	18082	40.4972	0.999998	0.452417	0.43216
Gm21677			Scml2			Ccdc92			GOTERM_BP_DIRECT	GO:0007126~meiotic nuclear division	2	3.50877	0.0593385	HORMAD1, SMC1B	47	24	18082	32.0603	1	0.530091	0.506355
Gm364			Slc25a31			Pramel3			GOTERM_BP_DIRECT	GO:0060441~epithelial tube branching involved in lung morphogenesis	2	3.50877	0.0593385	FOXF1, ESRP1	47	24	18082	32.0603	1	0.530091	0.506355
Gm5634			Smagp			1700001L05Rik			GOTERM_BP_DIRECT	GO:0007049~cell cycle	5	8.77193	0.0700857	SYCE1, STAG3, SYCP1, TEX14, SMC1B	47	614	18082	3.13293	1	0.605902	0.578772
Gm773			Smc1b			Orc1
Gtsf1			Stag3			Chd3os
Gyltl1b			Stk31			Pnma5
Hba-a1			Stra8			Setdb2
Hmga1			Syce1			1700013H16Rik
Hmga1-rs1			Sycp1			4930447C04Rik
Igf2bp1			Taf7l			Ccdc136
Lcn2			Taf9b			Ccdc172
M1ap			Tcfl5			Ott
Mageb16			Tdrd1			Fnip2
Mageb4			Tdrd5			LOC100503280
Mef2b			Tdrd9			Map3k5
Mt2			Tdrkh			Pls1
Nanos3			Tex11			Ripk4
Pdxp			Tex12			Upp1
Pnldc1			Tex13			4933427D06Rik
Pou5f1			Tex14			Bnc2
Pramef12			Tex15			4932438A13Rik
Pramel1			Tktl1			A830080D01Rik
Prr19			Uba1y			Ankrd12
Psma8			Usp26			Ankrd26
Rbmxl2			Xlr5a			Atm
Rcor2			Xlr5b			Cenpf
Ret			Zbtb16			Clic6
Rimklb			Zyg11a			Cpeb1
Rpl10l						D330045A20Rik
Rpl39l						Dclk2
Smim22						Dmxl2
Sohlh1						Dock3
Sohlh2						Edrf1
Sox3						Eif5a2
Spint1						Esco2
Susd4						Esx1
Taf4b						Fam217b
Tcl1						Fancd2
Tdrd12						Gm1564
Tex101						Heatr1
Tex19.1						Hells
Trap1a						Henmt1
Trim71						Herc1
Tuba3a						Kit
Tuba3b						Lin28b
Uchl1						Mdn1
Xlr3c						Nbeal1
Xlr4b						Ndrg4
Xlr5c						Neto2
						Pask
						Pgap1
						Pgm2l1
						Pik3r3
						Pole
						Prkdc
						Ptpn4
						Rasa2
						Rec8
						Reln
						Spata5
						Sycp2
						Tex16
						Usp34
						Vps13a
						Vps13c
						Zcwpw1
						Zfp518a
						Zswim5
