# Supplementary material for: SRSF10 is essential for progenitor spermatogonia expansion by regulating alternative splicing
Source: eLife journal article supplement (doi:10.7554/elife.78211), 2022-10-24
Supplement: fig4-data2 [file Figure 4-source data 2.xlsx]

## Sheet: Figure 4E
Figure 4E-source data: The expression of marker genes in control and Srsf10-cKO testes at P6.
														The detailed information of Figure 4E
																	gene-Ct		actin-Ct				ΔΔCt	2^-ΔΔCt	mean
														Bmi1	Control-1	rep-1	23.54	23.545	17.89	17.85	5.65	5.695	-0.045	1.03168	1.00049
	Control-1	Control-2	Control-3	Control-4	mean		Srsf10cKO-1	Srsf10cKO-2	Srsf10cKO-3	Srsf10cKO-4	mean	T-test				rep-2	23.55		17.81		5.74		0.045	0.96929
Bmi1	1.00049	0.695377	0.617769	1.41796	0.932898		0.750644	1.1378	0.905199	1.29696	1.02265	0.695248			Control-2	rep-1	24.21		18.04		6.17		0.475	0.719467	0.695377
Bcl6b	1.01756	0.666104	1.14939	1.41981	1.06322		1.07736	0.761261	1.37673	1.0042	1.05489	0.968372				rep-2	24.29		18.02		6.27		0.575	0.671286
Etv5	1.00217	0.854484	0.924219	0.990513	0.942846		1.17789	0.740187	1.10895	0.713261	0.93507	0.952769			Control-3	rep-1	24.26		17.89		6.37		0.675	0.626332	0.617769
Lhx1	1.00086	0.637418	0.505739	1.17329	0.829327		0.740721	0.545519	0.574349	0.834004	0.673648	0.394443				rep-2	24.27		17.86		6.41		0.715	0.609205
Cd82	1.00346	1.01366	0.861593	1.22264	1.02534		0.851958	0.783227	0.923654	1.1661	0.931236	0.431888			Control-4	rep-1	23.01		17.92		5.09		-0.605	1.52098	1.41796
Id4	1.00073	0.938095	0.964075	1.29236	1.04881		0.70423	0.707825	1.01164	0.75589	0.794897	0.0605164				rep-2	23.22		17.92		5.3		-0.395	1.31494
Gfra1	1.0001	1.0455	0.711817	1.0944	0.962952		0.824145	0.648611	0.687787	0.466617	0.65679	0.0353463			Srsf10cKO-1	rep-1	24.12		18.18		5.94		0.245	0.843816	0.750644
Lin28a	1.02027	1.42907	0.833644	1.59152	1.21863		0.484718	0.549445	0.392631	0.473756	0.475137	0.00594486				rep-2	24		17.7		6.3		0.605	0.657471
Nanos3	1.00154	2.0243	1.03892	1.08407	1.28721		0.614272	0.86622	0.603614	0.477413	0.64038	0.0469321			Srsf10cKO-2	rep-1	22.73		17.28		5.45		-0.245	1.18509	1.1378
Ngn3	1.00217	0.968754	0.376004	0.913969	0.815224		0.442092	0.371982	0.179332	0.457911	0.362829	0.0306158				rep-2	22.9		17.33		5.57		-0.125	1.09051
Sohlh1	1.00038	1.83984	1.08746	1.81508	1.43569		0.709163	1.01148	0.541517	0.386222	0.662095	0.0260743			Srsf10cKO-3	rep-1	23.3		17.59		5.71		0.015	0.989657	0.905199
Plzf	1.00154	1.17309	0.700739	0.879654	0.938755		0.5784	0.560856	0.306738	0.250869	0.424216	0.00767827				rep-2	23.58		17.6		5.98		0.285	0.820742
Sall4	1.00318	1.69578	1.2421	1.29734	1.3096		0.883345	0.85042	0.704677	0.421918	0.71509	0.0156306			Srsf10cKO-4	rep-1	23.16		17.86		5.3		-0.395	1.31494	1.29696
																rep-2	23.16		17.82		5.34		-0.355	1.27899
														Bcl6b	Control-1	rep-1	25.46	25.69	17.89	17.85	7.57	7.84	-0.27	1.20581	1.01756
																rep-2	25.92		17.81		8.11		0.27	0.82932
															Control-2	rep-1	26.28		18.04		8.24		0.4	0.757858	0.666104
																rep-2	26.66		18.02		8.64		0.8	0.574349
															Control-3	rep-1	25.48		17.89		7.59		-0.25	1.18921	1.14939
																rep-2	25.55		17.86		7.69		-0.15	1.10957
															Control-4	rep-1	25.21		17.92		7.29		-0.55	1.46409	1.41981
																rep-2	25.3		17.92		7.38		-0.46	1.37554
															Srsf10cKO-1	rep-1	25.83		18.18		7.65		-0.19	1.14076	1.07736
																rep-2	25.52		17.7		7.82		-0.02	1.01396
															Srsf10cKO-2	rep-1	25.45		17.28		8.17		0.33	0.795536	0.761261
																rep-2	25.63		17.33		8.3		0.46	0.726986
															Srsf10cKO-3	rep-1	25.03		17.59		7.44		-0.4	1.31951	1.37673
																rep-2	24.92		17.6		7.32		-0.52	1.43396
															Srsf10cKO-4	rep-1	25.64		17.86		7.78		-0.06	1.04247	1.0042
																rep-2	25.71		17.82		7.89		0.05	0.965936
														Etv5	Control-1	rep-1	23	23.055	17.89	17.85	5.11	5.205	-0.095	1.06807	1.00217
																rep-2	23.11		17.81		5.3		0.095	0.936272
															Control-2	rep-1	23.57		18.04		5.53		0.325	0.798298	0.854484
																rep-2	23.36		18.02		5.34		0.135	0.91067
															Control-3	rep-1	23.35		17.89		5.46		0.255	0.837987	0.924219
																rep-2	23.05		17.86		5.19		-0.015	1.01045
															Control-4	rep-1	23.08		17.92		5.16		-0.045	1.03168	0.990513
																rep-2	23.2		17.92		5.28		0.075	0.949342
															Srsf10cKO-1	rep-1	22.98		18.18		4.8		-0.405	1.32409	1.17789
																rep-2	22.86		17.7		5.16		-0.045	1.03168
															Srsf10cKO-2	rep-1	22.72		17.28		5.44		0.235	0.849685	0.740187
																rep-2	23.2		17.33		5.87		0.665	0.630689
															Srsf10cKO-3	rep-1	22.76		17.59		5.17		-0.035	1.02456	1.10895
																rep-2	22.55		17.6		4.95		-0.255	1.19334
															Srsf10cKO-4	rep-1	23.47		17.86		5.61		0.405	0.755236	0.713261
																rep-2	23.6		17.82		5.78		0.575	0.671286
														Lhx1	Control-1	rep-1	26.47	26.49	17.89	17.85	8.58	8.64	-0.06	1.04247	1.00086
																rep-2	26.51		17.81		8.7		0.06	0.959264
															Control-2	rep-1	27.3		18.04		9.26		0.62	0.650671	0.637418
																rep-2	27.34		18.02		9.32		0.68	0.624165
															Control-3	rep-1	27.45		17.89		9.56		0.92	0.528509	0.505739
																rep-2	27.55		17.86		9.69		1.05	0.482968
															Control-4	rep-1	26.29		17.92		8.37		-0.27	1.20581	1.17329
																rep-2	26.37		17.92		8.45		-0.19	1.14076
															Srsf10cKO-1	rep-1	27		18.18		8.82		0.18	0.882703	0.740721
																rep-2	27.08		17.7		9.38		0.74	0.598739
															Srsf10cKO-2	rep-1	26.84		17.28		9.56		0.92	0.528509	0.545519
																rep-2	26.8		17.33		9.47		0.83	0.562529
															Srsf10cKO-3	rep-1	27.03		17.59		9.44		0.8	0.574349	0.574349
																rep-2	27.04		17.6		9.44		0.8	0.574349
															Srsf10cKO-4	rep-1	26.67		17.86		8.81		0.17	0.888843	0.834004
																rep-2	26.82		17.82		9		0.36	0.779165
														Cd82	Control-1	rep-1	23.85	23.93	17.89	17.85	5.96	6.08	-0.12	1.08673	1.00346
																rep-2	24.01		17.81		6.2		0.12	0.920188
															Control-2	rep-1	23.99		18.04		5.95		-0.13	1.09429	1.01366
																rep-2	24.2		18.02		6.18		0.1	0.933033
															Control-3	rep-1	24.17		17.89		6.28		0.2	0.870551	0.861593
																rep-2	24.17		17.86		6.31		0.23	0.852635
															Control-4	rep-1	23.71		17.92		5.79		-0.29	1.22264	1.22264
																rep-2	23.71		17.92		5.79		-0.29	1.22264
															Srsf10cKO-1	rep-1	24.34		18.18		6.16		0.08	0.946058	0.851958
																rep-2	24.18		17.7		6.48		0.4	0.757858
															Srsf10cKO-2	rep-1	23.8		17.28		6.52		0.44	0.737135	0.783227
																rep-2	23.68		17.33		6.35		0.27	0.82932
															Srsf10cKO-3	rep-1	23.82		17.59		6.23		0.15	0.90125	0.923654
																rep-2	23.76		17.6		6.16		0.08	0.946058
															Srsf10cKO-4	rep-1	23.65		17.86		5.79		-0.29	1.22264	1.1661
																rep-2	23.75		17.82		5.93		-0.15	1.10957
														Id4	Control-1	rep-1	27.11	27.125	17.89	17.85	9.22	9.275	-0.055	1.03886	1.00073
																rep-2	27.14		17.81		9.33		0.055	0.962594
															Control-2	rep-1	27.32		18.04		9.28		0.005	0.99654	0.938095
																rep-2	27.48		18.02		9.46		0.185	0.879649
															Control-3	rep-1	27.3		17.89		9.41		0.135	0.91067	0.964075
																rep-2	27.11		17.86		9.25		-0.025	1.01748
															Control-4	rep-1	26.82		17.92		8.9		-0.375	1.29684	1.29236
																rep-2	26.83		17.92		8.91		-0.365	1.28788
															Srsf10cKO-1	rep-1	27.68		18.18		9.5		0.225	0.855595	0.70423
																rep-2	27.83		17.7		10.13		0.855	0.552865
															Srsf10cKO-2	rep-1	26.99		17.28		9.71		0.435	0.739694	0.707825
																rep-2	27.17		17.33		9.84		0.565	0.675955
															Srsf10cKO-3	rep-1	26.92		17.59		9.33		0.055	0.962594	1.01164
																rep-2	26.79		17.6		9.19		-0.085	1.06069
															Srsf10cKO-4	rep-1	27.48		17.86		9.62		0.345	0.787308	0.75589
																rep-2	27.56		17.82		9.74		0.465	0.724471
																					0
														Gfra1	Control-1	rep-1	24.66	24.64	17.89	17.85	6.77	6.79	-0.02	1.01396	1.0001
																rep-2	24.62		17.81		6.81		0.02	0.986233
															Control-2	rep-1	24.88		18.04		6.84		0.05	0.965936	1.0455
																rep-2	24.64		18.02		6.62		-0.17	1.12506
															Control-3	rep-1	25.29		17.89		7.4		0.61	0.655197	0.711817
																rep-2	25.03		17.86		7.17		0.38	0.768438
															Control-4	rep-1	24.6		17.92		6.68		-0.11	1.07923	1.0944
																rep-2	24.56		17.92		6.64		-0.15	1.10957
															Srsf10cKO-1	rep-1	24.98		18.18		6.8		0.01	0.993092	0.824145
																rep-2	25.1		17.7		7.4		0.61	0.655197
															Srsf10cKO-2	rep-1	24.73		17.28		7.45		0.66	0.632878	0.648611
																rep-2	24.71		17.33		7.38		0.59	0.664343
															Srsf10cKO-3	rep-1	24.93		17.59		7.34		0.55	0.68302	0.687787
																rep-2	24.92		17.6		7.32		0.53	0.692555
															Srsf10cKO-4	rep-1	25.78		17.86		7.92		1.13	0.456916	0.466617
																rep-2	25.68		17.82		7.86		1.07	0.476319
														Lin28a	Control-1	rep-1	25.72	25.51	17.89	17.85	7.83	7.66	0.17	0.888843	1.00695
																rep-2	25.3		17.81		7.49		-0.17	1.12506
															Control-2	rep-1	25.53		18.04		7.49		-0.17	1.12506	1.05908
																rep-2	25.69		18.02		7.67		0.01	0.993092
															Control-3	rep-1	26.11		17.89		8.22		0.56	0.678302	0.618473
																rep-2	26.36		17.86		8.5		0.84	0.558644
															Control-4	rep-1	25.47		17.92		7.55		-0.11	1.07923	1.18133
																rep-2	25.22		17.92		7.3		-0.36	1.28343
															Srsf10cKO-1	rep-1	26.65		18.18		8.47		0.81	0.570382	0.492521
																rep-2	26.63		17.7		8.93		1.27	0.41466
															Srsf10cKO-2	rep-1	26.15		17.28		8.87		1.21	0.432269	0.43681
																rep-2	26.17		17.33		8.84		1.18	0.441351
															Srsf10cKO-3	rep-1	27.05		17.59		9.46		1.8	0.287175	0.299629
																rep-2	26.94		17.6		9.34		1.68	0.312083
															Srsf10cKO-4	rep-1	26.95		17.86		9.09		1.43	0.371131	0.351651
																rep-2	27.07		17.82		9.25		1.59	0.332171
														Nanos3	Control-1	rep-1	24.91	24.91	17.89	17.85	7.02	7.06	-0.04	1.02811	1.00038
																rep-2	24.91		17.81		7.1		0.04	0.972655
															Control-2	rep-1	23.97		18.04		5.93		-1.13	2.18859	1.52957
																rep-2	25.28		18.02		7.26		0.2	0.870551
															Control-3	rep-1	25.26		17.89		7.37		0.31	0.806642	0.769342
																rep-2	25.37		17.86		7.51		0.45	0.732043
															Control-4	rep-1	25.23		17.92		7.31		0.25	0.840896	0.804667
																rep-2	25.36		17.92		7.44		0.38	0.768438
															Srsf10cKO-1	rep-1	25.76		18.18		7.58		0.52	0.697372	0.62037
																rep-2	25.64		17.7		7.94		0.88	0.543367
															Srsf10cKO-2	rep-1	24.93		17.28		7.65		0.59	0.664343	0.688184
																rep-2	24.88		17.33		7.55		0.49	0.712025
															Srsf10cKO-3	rep-1	25.7		17.59		8.11		1.05	0.482968	0.460636
																rep-2	25.85		17.6		8.25		1.19	0.438303
															Srsf10cKO-4	rep-1	26.27		17.86		8.41		1.35	0.392292	0.354366
																rep-2	26.54		17.82		8.72		1.66	0.316439
														Ngn3	Control-1	rep-1	29.16	29.145	17.89	17.85	11.27	11.295	-0.025	1.01748	1.00015
																rep-2	29.13		17.81		11.32		0.025	0.982821
															Control-2	rep-1	29.5		18.04		11.46		0.165	0.891929	0.72432
																rep-2	30.16		18.02		12.14		0.845	0.556711
															Control-3	rep-1	30.79		17.89		12.9		1.605	0.328736	0.279791
																rep-2	31.27		17.86		13.41		2.115	0.230846
															Control-4	rep-1	29.8		17.92		11.88		0.585	0.666649	0.678404
																rep-2	29.75		17.92		11.83		0.535	0.690159
															Srsf10cKO-1	rep-1	30.76		18.18		12.58		1.285	0.410371	0.432853
																rep-2	30.13		17.7		12.43		1.135	0.455335
															Srsf10cKO-2	rep-1	30.87		17.28		13.59		2.295	0.203768	0.293329
																rep-2	30.01		17.33		12.68		1.385	0.382889
															Srsf10cKO-3	rep-1	31.71		17.59		14.12		2.825	0.141121	0.136853
																rep-2	31.81		17.6		14.21		2.915	0.132586
															Srsf10cKO-4	rep-1	30.92		17.86		13.06		1.765	0.294227	0.33989
																rep-2	30.49		17.82		12.67		1.375	0.385553
														Plzf	Control-1	rep-1	23.24	23.24	17.89	17.85	5.35	5.39	-0.04	1.02811	1.00038
																rep-2	23.24		17.81		5.43		0.04	0.972655
															Control-2	rep-1	23.59		18.04		5.55		0.16	0.895025	0.867961
																rep-2	23.66		18.02		5.64		0.25	0.840896
															Control-3	rep-1	24.25		17.89		6.36		0.97	0.510506	0.517682
																rep-2	24.18		17.86		6.32		0.93	0.524858
															Control-4	rep-1	23.92		17.92		6		0.61	0.655197	0.652934
																rep-2	23.93		17.92		6.01		0.62	0.650671
															Srsf10cKO-1	rep-1	24.12		18.18		5.94		0.55	0.68302	0.588068
																rep-2	24.11		17.7		6.41		1.02	0.493116
															Srsf10cKO-2	rep-1	23.84		17.28		6.56		1.17	0.444421	0.445967
																rep-2	23.88		17.33		6.55		1.16	0.447513
															Srsf10cKO-3	rep-1	25.06		17.59		7.47		2.08	0.236514	0.234081
																rep-2	25.1		17.6		7.5		2.11	0.231647
															Srsf10cKO-4	rep-1	25.67		17.86		7.81		2.42	0.186856	0.186211
																rep-2	25.64		17.82		7.82		2.43	0.185565
														Sall4	Control-1	rep-1	24.07	24.035	17.89	17.85	6.18	6.185	-0.005	1.00347	1.00001
																rep-2	24		17.81		6.19		0.005	0.99654
															Control-2	rep-1	23.9		18.04		5.86		-0.325	1.25266	1.25266
																rep-2	23.88		18.02		5.86		-0.325	1.25266
															Control-3	rep-1	24.3		17.89		6.41		0.225	0.855595	0.915813
																rep-2	24.08		17.86		6.22		0.035	0.976032
															Control-4	rep-1	24.04		17.92		6.12		-0.065	1.04608	0.997714
																rep-2	24.18		17.92		6.26		0.075	0.949342
															Srsf10cKO-1	rep-1	24.34		18.18		6.16		-0.025	1.01748	0.894293
																rep-2	24.26		17.7		6.56		0.375	0.771105
															Srsf10cKO-2	rep-1	24.05		17.28		6.77		0.585	0.666649	0.67602
																rep-2	24.06		17.33		6.73		0.545	0.685391
															Srsf10cKO-3	rep-1	24.66		17.59		7.07		0.885	0.541488	0.53776
																rep-2	24.69		17.6		7.09		0.905	0.534033
															Srsf10cKO-4	rep-1	25.63		17.86		7.77		1.585	0.333325	0.320023
																rep-2	25.71		17.82		7.89		1.705	0.306721
														Sohlh1	Control-1	rep-1	25.79	25.76	17.89	17.85	7.9	7.91	-0.01	1.00696	1.00002
																rep-2	25.73		17.81		7.92		0.01	0.993092
															Control-2	rep-1	25.45		18.04		7.41		-0.5	1.41421	1.30171
																rep-2	25.68		18.02		7.66		-0.25	1.18921
															Control-3	rep-1	25.57		17.89		7.68		-0.23	1.17283	1.07274
																rep-2	25.81		17.86		7.95		0.04	0.972655
															Control-4	rep-1	24.82		17.92		6.9		-1.01	2.01391	1.98638
																rep-2	24.86		17.92		6.94		-0.97	1.95884
															Srsf10cKO-1	rep-1	26.48		18.18		8.3		0.39	0.76313	0.702421
																rep-2	26.25		17.7		8.55		0.64	0.641713
															Srsf10cKO-2	rep-1	25.54		17.28		8.26		0.35	0.784584	0.776511
																rep-2	25.62		17.33		8.29		0.38	0.768438
															Srsf10cKO-3	rep-1	26.64		17.59		9.05		1.14	0.45376	0.438566
																rep-2	26.75		17.6		9.15		1.24	0.423373
															Srsf10cKO-4	rep-1	26.9		17.86		9.04		1.13	0.456916	0.417922
																rep-2	27.13		17.82		9.31		1.4	0.378929
