# Supplementary material for: SRSF10 is essential for progenitor spermatogonia expansion by regulating alternative splicing
Source: eLife journal article supplement (doi:10.7554/elife.78211), 2022-10-24
Supplement: fig6-data1 [file Figure 6-source data 1.xlsx]

## Sheet: Figure 6A-B USPG1-down
USPG1-down
	p_val	avg_log2FC	pct.1	pct.2	p_val_adj
Top2a	1.12e-25	0.835164	0.99	0.868	2.62e-21
Gm42418	2.77e-30	0.770872	1	1	6.47e-26
Srsf10	9.74e-31	0.767414	0.966	0.846	2.27e-26
Hnrnpa0	2.37e-28	0.740712	0.995	0.886	5.51e-24
Dnaja1	1.43e-41	0.722618	1	0.993	3.34e-37
Hist1h1b	1.95e-14	0.702035	0.488	0.168	4.55e-10
Mki67	1.26e-12	0.663377	0.897	0.714	2.94e-08
Cenpe	3.52e-15	0.63148	0.946	0.762	8.2e-11
Ppid	5.98e-21	0.563794	0.961	0.791	1.39e-16
Cenpf	1.35e-13	0.557926	0.98	0.967	3.15e-09
Mphosph8	2.87e-20	0.554383	0.995	0.952	6.68e-16
Bc1	2.85e-14	0.554208	0.99	0.945	6.65e-10
Sycp3	1.67e-13	0.537504	0.867	0.696	3.9e-09
Mtr	3.96e-13	0.529867	0.734	0.498	9.24e-09
Prc1	1.56e-09	0.51707	0.813	0.63	3.64e-05
Taf1d	5.5e-17	0.513473	0.995	0.927	1.28e-12
Kif20b	2.13e-11	0.500704	0.857	0.703	4.97e-07
Rcc2	4.26e-19	0.497539	0.995	0.945	9.92e-15
Nusap1	5.68e-12	0.492481	0.768	0.516	1.32e-07
Anp32e	4.29e-15	0.489605	0.98	0.894	1e-10
Mns1	5.54e-14	0.486564	0.887	0.755	1.29e-09
Tnrc6c	4.94e-16	0.480742	0.97	0.842	1.15e-11
Mpc2	8.25e-16	0.468433	0.995	0.982	1.92e-11
Zcrb1	6.62e-14	0.465206	0.99	0.963	1.54e-09
Hnrnpa1	1.12e-22	0.465181	1	0.989	2.62e-18
Ccnb1	6.71e-09	0.455781	0.941	0.842	0.000156348
Ndufa11	2.15e-15	0.45563	0.995	0.967	5.01e-11
Trim71	2.43e-10	0.453053	0.921	0.824	5.66e-06
Siva1	1.69e-12	0.448918	0.985	0.934	3.95e-08
Mis18bp1	1.82e-10	0.447087	0.847	0.692	4.25e-06
Smc4	2.6e-09	0.43211	0.936	0.875	6.07e-05
Cdc20	2.25e-07	0.430875	0.897	0.78	0.00523413
Ndc80	9.48e-11	0.426112	0.833	0.623	2.21e-06
Sycp1	9.36e-12	0.425142	0.946	0.886	2.18e-07
Aamp	1.44e-13	0.424824	0.97	0.916	3.36e-09
Hist1h1e	1.09e-07	0.419702	0.626	0.407	0.00254725
Eif5b	2.27e-17	0.415153	0.995	0.993	5.3e-13
Csnk2a2	5.47e-12	0.413344	0.892	0.703	1.27e-07
Mrpl54	2.82e-10	0.412613	0.833	0.703	6.57e-06
mt-Atp8	8.45e-10	0.410979	0.813	0.634	1.97e-05
Tuba3a	4.86e-15	0.410286	1	1	1.13e-10
Map1lc3b	9.55e-10	0.407429	0.995	0.974	2.23e-05
Kif23	1.24e-09	0.407239	0.773	0.593	2.88e-05
Arl4a	7.33e-11	0.405548	0.773	0.575	1.71e-06
Jund	4.34e-12	0.401524	0.98	0.908	1.01e-07
Aspm	7.11e-08	0.398775	0.66	0.447	0.00165715
Cul3	1.66e-11	0.397842	0.975	0.868	3.87e-07
Cdkn1c	7.93e-08	0.396272	0.709	0.549	0.00184808
Hnrnpdl	9.83e-12	0.39507	0.995	0.956	2.29e-07
Jun	4.72e-09	0.393906	0.596	0.359	0.000109959
Hist1h4d	6.26e-08	0.389814	0.621	0.414	0.00145889
Arl6ip1	6.91e-08	0.387241	0.97	0.934	0.00161141
Gm49756	0.000228602	0.380572	0.291	0.154	1
Bub1b	9.45e-10	0.37851	0.833	0.637	2.2e-05
Cdca3	5.89e-07	0.378018	0.852	0.714	0.0137268
Cks2	1.4e-06	0.376668	0.99	0.945	0.0325458
Serf1	6.06e-12	0.375864	0.97	0.927	1.41e-07
Ttk	3.23e-12	0.374219	0.695	0.432	7.53e-08
Brd1	5.26e-09	0.373938	0.872	0.722	0.000122719
Eif4b	8.87e-10	0.370715	0.897	0.799	2.07e-05
Dstn	4.93e-10	0.360103	0.995	0.993	1.15e-05
Nmt2	3.13e-10	0.359477	0.99	0.967	7.29e-06
Btg1	2.73e-09	0.358768	0.714	0.564	6.36e-05
Puf60	1.06e-09	0.357578	0.97	0.897	2.48e-05
Smc1b	1.05e-08	0.357198	0.99	0.93	0.000245728
Kif11	6.58e-08	0.355887	0.847	0.7	0.00153292
Rad50	1.52e-09	0.355611	0.921	0.813	3.54e-05
Anln	3.57e-07	0.354572	0.67	0.524	0.00831533
Ccna2	9.13e-08	0.347601	0.951	0.799	0.00212768
Lig1	4.01e-05	0.347445	0.966	0.894	0.935342
Tacc3	3.52e-09	0.345936	0.857	0.656	8.2e-05
Sgo2a	3.14e-08	0.345575	0.837	0.707	0.000732569
Herc1	1.48e-06	0.343189	0.872	0.747	0.0345518
Nrd1	1.22e-07	0.342427	0.867	0.722	0.00285271
Rnaseh2c	1.44e-08	0.341511	0.887	0.714	0.00033647
Ctr9	5.41e-10	0.341361	0.729	0.557	1.26e-05
Hist1h2ae	1.49e-07	0.341275	0.596	0.363	0.00346831
Dync1i2	9.81e-09	0.340063	0.921	0.813	0.000228771
Cdk12	3.5e-07	0.3387	0.901	0.839	0.00815526
Dync1h1	1.71e-06	0.337602	0.887	0.821	0.0397486
Pcm1	6.85e-08	0.336957	0.936	0.901	0.0015972
Top1	3.2e-08	0.336827	0.941	0.868	0.000746521
Hmmr	3.76e-06	0.334826	0.67	0.509	0.0876228
Mprip	3.8e-07	0.327476	0.788	0.711	0.00886408
Incenp	1.52e-06	0.325433	0.916	0.857	0.0354533
Tle4	1.65e-08	0.323382	0.773	0.59	0.00038394
Ift74	5.65e-08	0.32326	0.778	0.659	0.00131619
Malat1	0.000147277	0.32257	0.98	0.978	1
Nfyb	1.69e-06	0.320181	0.793	0.667	0.0393336
Cited2	5.26e-07	0.319016	0.749	0.557	0.0122582
Parp1	1.59e-08	0.316207	1	0.974	0.000370826
Dynll2	3.98e-08	0.315267	0.99	0.971	0.000927388
Hnrnpul2	3.55e-08	0.314087	0.941	0.839	0.000826521
Lars2	3.68e-08	0.313569	0.778	0.59	0.000857855
Klf4	5.85e-08	0.312638	0.562	0.374	0.00136289
Prpf38b	4.67e-08	0.312258	0.951	0.868	0.00108973
Msh2	4.73e-07	0.310735	0.897	0.788	0.0110192
Stk31	2.08e-08	0.310026	0.961	0.919	0.000484508
Racgap1	1.12e-07	0.309005	0.704	0.524	0.00260441
mt-Nd2	4.26e-06	0.305685	0.99	0.941	0.0991929
Eva1b	3.37e-06	0.305162	0.64	0.524	0.0785825
Ncapd2	9.31e-08	0.30501	0.759	0.601	0.0021703
Edf1	2.49e-07	0.303841	0.926	0.81	0.00580607
Cdca8	1.87e-06	0.302961	0.946	0.934	0.0435102
Cfap36	1.09e-05	0.301439	0.571	0.436	0.253221
Cetn3	6.78e-08	0.301409	0.966	0.905	0.00157956
Ankrd31	5.18e-08	0.30117	0.493	0.289	0.00120679
Kif2a	5.05e-07	0.301034	0.921	0.835	0.0117701
Fubp1	3.82e-07	0.300988	0.99	0.952	0.00889883
AY036118	1.15e-07	0.300463	0.995	0.89	0.00269214
Cep295	2.59e-07	0.300014	0.783	0.63	0.00602616
Auts2	1.07e-05	0.298431	0.911	0.868	0.249443
Bptf	4.89e-08	0.297889	0.921	0.842	0.00114027
Hsp90aa1	8.14e-16	0.297314	1	1	1.9e-11
Nck1	2.36e-08	0.296846	0.773	0.575	0.000550904
Stag3	3.04e-06	0.296745	0.744	0.582	0.0708534
Pdcd11	2.15e-06	0.293709	0.941	0.879	0.0500212
Gpatch11	4e-06	0.292582	0.768	0.667	0.0932091
Taf1	1.03e-05	0.292335	0.906	0.81	0.239114
P4hb	5.35e-06	0.289877	0.911	0.879	0.124665
Nup50	2.34e-07	0.286548	0.823	0.711	0.00545906
Kif3a	5.07e-06	0.284046	0.847	0.718	0.118242
Tubb5	8.18e-08	0.282476	1	0.993	0.00190698
Spc25	1.26e-05	0.281993	0.842	0.773	0.29415
Swt1	3.13e-06	0.281297	0.818	0.718	0.072933
Rsrp1	1.98e-05	0.280671	0.645	0.52	0.461225
Ncapg	6.95e-08	0.280269	0.734	0.535	0.00161979
mt-Co1	1.01e-06	0.277246	0.995	0.978	0.0235708
Ilkap	1.71e-07	0.276766	0.66	0.491	0.00397498
Ankrd12	5.53e-06	0.276533	0.901	0.817	0.128894
Myo9a	8.15e-06	0.275094	0.714	0.56	0.189952
Kif2c	1.05e-06	0.274296	0.714	0.564	0.0245413
Snhg9	0.000106521	0.273674	0.872	0.773	1
Sirt1	2.77e-06	0.272532	0.517	0.333	0.0645841
Apoe	3.18e-05	0.272236	0.384	0.542	0.742081
Hist1h1a	0.00116589	0.272081	0.714	0.626	1
Fuca1	3.38e-05	0.27177	0.498	0.359	0.788656
Pmm1	6.03e-06	0.271752	0.768	0.667	0.140446
Wapl	3.81e-06	0.270191	0.995	0.963	0.0887404
Egln1	3.94e-07	0.268069	0.591	0.374	0.00917626
Supt5	5.95e-06	0.267949	0.951	0.908	0.138669
Hist2h2ac	3.05e-10	0.267181	0.296	0.084	7.11e-06
Slc25a31	1.95e-06	0.266951	0.99	0.952	0.0455458
Rapgef6	3.1e-05	0.266031	0.626	0.516	0.721875
Ccdc34	2.66e-06	0.265366	0.936	0.875	0.0620545
Slc25a4	0.000527056	0.265188	0.768	0.681	1
Map3k4	3.17e-06	0.265129	0.823	0.703	0.0739311
Tex10	1.61e-05	0.265077	0.887	0.846	0.374595
Snhg6	3.01e-06	0.265011	0.655	0.469	0.0702654
Ppp2r5c	9.48e-07	0.263605	0.635	0.436	0.0220916
Slc39a6	2.89e-05	0.263582	0.571	0.447	0.672756
Tdrd5	1.41e-05	0.263499	0.571	0.407	0.329586
Slc12a2	0.000124046	0.263492	0.69	0.597	1
Rps28	1.26e-20	0.26326	1	1	2.94e-16
Ttn	3.12e-05	0.261483	0.384	0.227	0.72659
Zc3h13	2.55e-05	0.261442	0.921	0.842	0.593689
Tdrd1	2.26e-05	0.2602	0.635	0.52	0.526784
Hjurp	0.000296754	0.260167	0.837	0.795	1
Fbxo31	7.25e-07	0.260075	0.7	0.575	0.0169052
Ppp1cc	1.44e-06	0.260061	0.97	0.952	0.0336001
Ggct	2.67e-06	0.259815	0.631	0.473	0.062232
Tex9	2.95e-07	0.259714	0.488	0.3	0.00687513
Akr1b3	3.23e-06	0.259017	0.931	0.879	0.0752026
Ccdc6	0.00053582	0.258984	0.704	0.692	1
Rad21	3.9e-05	0.258783	0.951	0.916	0.909245
Cd2bp2	1.55e-06	0.258469	0.783	0.659	0.036152
Foxc2	3.62e-05	0.257375	0.537	0.374	0.842753
Nmt1	1.27e-07	0.257257	0.655	0.447	0.00295563
Bms1	5.99e-06	0.256966	0.946	0.886	0.139568
Lap3	1.55e-05	0.256789	0.867	0.784	0.361363
Glul	2.62e-05	0.255615	0.803	0.725	0.610377
Ubn1	1.47e-05	0.255091	0.847	0.755	0.341816
Orc6	1.43e-05	0.254557	0.916	0.821	0.333578
Ofd1	5.34e-06	0.254474	0.714	0.59	0.124472
Ehd1	1.39e-05	0.254225	0.778	0.663	0.323235
Unc119b	0.000200929	0.253849	0.635	0.538	1
Safb	7.22e-06	0.253546	0.921	0.861	0.168283
Gtf2f1	1.12e-05	0.253457	0.901	0.802	0.262153
Sbds	1.82e-07	0.253402	0.527	0.322	0.00423637
Rbbp6	0.000101553	0.253332	0.951	0.872	1
Larp1b	4.37e-06	0.252515	0.606	0.436	0.101945
Ints6	3.73e-06	0.252346	0.911	0.842	0.0868331
Tsacc	1.98e-09	0.251927	0.369	0.143	4.63e-05
Tdrkh	3.69e-05	0.250137	0.906	0.784	0.860184

## Sheet: down-GO
GO
Category	Term	Count	%	PValue	Genes	List Total	Pop Hits	Pop Total	Fold Enrichment	Bonferroni	Benjamini	FDR
GOTERM_BP_DIRECT	GO:0007049~cell cycle	42	23.5955	1.08898e-24	CDKN1C, CDCA3, SYCP1, CETN3, HJURP, BUB1B, CDCA8, KIF11, MKI67, SMC4, CDC20, PPP1CC, CCNB1, RACGAP1, MIS18BP1, RAD21, NUSAP1, LIG1, RCC2, CSNK2A2, KIF23, WAPL, NDC80, SMC1B, FBXO31, CCNA2, ANLN, CENPE, ASPM, RAD50, MSH2, KIF2A, STAG3, PRC1, INCENP, CKS2, NCAPD2, KIF2C, SYCP3, KIF20B, SPC25, TAF1	162	614	18082	7.63506	1.22837e-21	1.22837e-21	1.21857e-21
GOTERM_BP_DIRECT	GO:0051301~cell division	32	17.9775	2.03139e-21	CDCA3, SYCP1, CETN3, BUB1B, CDCA8, KIF11, SMC4, CDC20, PPP1CC, CCNB1, RACGAP1, MIS18BP1, RAD21, NUSAP1, LIG1, RCC2, KIF23, WAPL, NDC80, CCNA2, ANLN, CENPE, ASPM, KIF2A, PRC1, INCENP, CKS2, NCAPD2, KIF2C, SYCP3, KIF20B, SPC25	162	374	18082	9.55014	2.29141e-18	1.14571e-18	1.13656e-18
GOTERM_BP_DIRECT	GO:0007067~mitotic nuclear division	27	15.1685	2.08419e-19	CDCA3, CETN3, BUB1B, CDCA8, KIF11, SMC4, CDC20, CCNB1, MIS18BP1, RAD21, NUSAP1, OFD1, RCC2, KIF23, WAPL, NDC80, CCNA2, ANLN, CENPE, ASPM, KIF2A, INCENP, NCAPD2, KIF2C, SYCP3, KIF20B, SPC25	162	277	18082	10.8797	2.35096e-16	7.83655e-17	7.77402e-17
GOTERM_BP_DIRECT	GO:0007059~chromosome segregation	12	6.74157	3.97038e-10	TOP2A, CENPE, CENPF, STAG3, INCENP, RAD21, HJURP, KIF2C, TOP1, KIF11, NDC80, SPC25	162	89	18082	15.0495	4.47859e-07	1.11965e-07	1.11071e-07
GOTERM_BP_DIRECT	GO:0007018~microtubule-based movement	9	5.05618	4.58593e-07	DYNC1H1, CENPE, DYNC1I2, KIF2A, KIF3A, KIF23, KIF2C, KIF11, KIF20B	162	78	18082	12.8789	0.000517159	0.000103459	0.000102633
GOTERM_BP_DIRECT	GO:0007052~mitotic spindle organization	5	2.80899	0.000104935	CCNB1, KIF2A, SBDS, NDC80, SPC25	162	28	18082	19.9317	0.111636	0.0197279	0.0195705
GOTERM_BP_DIRECT	GO:0051310~metaphase plate congression	4	2.24719	0.000143693	CENPE, CENPF, KIF2C, NDC80	162	12	18082	37.2058	0.149642	0.0231551	0.0229703
GOTERM_BP_DIRECT	GO:0007076~mitotic chromosome condensation	4	2.24719	0.000185581	NUSAP1, NCAPG, NCAPD2, SMC4	162	13	18082	34.3438	0.188892	0.0257191	0.0255139
GOTERM_BP_DIRECT	GO:0051321~meiotic cell cycle	7	3.93258	0.000205242	TDRD1, RAD50, STAG3, SYCP1, SYCP3, MNS1, SMC1B	162	95	18082	8.22443	0.206687	0.0257191	0.0255139
GOTERM_BP_DIRECT	GO:0007080~mitotic metaphase plate congression	5	2.80899	0.000228006	CENPE, CCNB1, CUL3, CDCA8, KIF2C	162	34	18082	16.4143	0.226802	0.0257191	0.0255139
GOTERM_BP_DIRECT	GO:0007283~spermatogenesis	13	7.30337	0.000293513	TDRKH, BTG1, SYCP1, TDRD5, SIRT1, TDRD1, DNAJA1, ASPM, CCNB1, RACGAP1, SYCP3, MNS1, HIST1H1A	162	407	18082	3.56517	0.281889	0.0300984	0.0298582
GOTERM_BP_DIRECT	GO:0051987~positive regulation of attachment of spindle microtubules to kinetochore	3	1.68539	0.000467221	CENPE, CCNB1, RCC2	162	4	18082	83.713	0.409714	0.0439188	0.0435684
GOTERM_BP_DIRECT	GO:0040016~embryonic cleavage	3	1.68539	0.0021298	TOP2A, CUL3, TOP1	162	8	18082	41.8565	0.909733	0.151586	0.150376
GOTERM_BP_DIRECT	GO:0051315~attachment of mitotic spindle microtubules to kinetochore	3	1.68539	0.0021298	CENPE, KIF2C, NDC80	162	8	18082	41.8565	0.909733	0.151586	0.150376
GOTERM_BP_DIRECT	GO:0030030~cell projection organization	7	3.93258	0.00234007	OFD1, EHD1, UNC119B, IFT74, PCM1, KIF3A, CUL3	162	151	18082	5.17431	0.92883	0.151586	0.150376
GOTERM_BP_DIRECT	GO:0000281~mitotic cytokinesis	4	2.24719	0.00235773	ANLN, RACGAP1, NUSAP1, KIF23	162	30	18082	14.8823	0.930238	0.151586	0.150376
GOTERM_BP_DIRECT	GO:0006302~double-strand break repair	5	2.80899	0.00239796	RAD50, LIG1, MSH2, PARP1, RAD21	162	63	18082	8.85851	0.93334	0.151586	0.150376
GOTERM_BP_DIRECT	GO:0006397~mRNA processing	10	5.61798	0.00241892	PRPF38B, PUF60, PDCD11, SUPT5, CD2BP2, RBBP6, CDK12, ZCRB1, HNRNPA1, SRSF10	162	322	18082	3.46638	0.934901	0.151586	0.150376
GOTERM_BP_DIRECT	GO:0051983~regulation of chromosome segregation	3	1.68539	0.00272233	KIF2C, MKI67, WAPL	162	9	18082	37.2058	0.953809	0.161621	0.160331
GOTERM_BP_DIRECT	GO:0032467~positive regulation of cytokinesis	4	2.24719	0.00310722	RACGAP1, CUL3, KIF23, KIF20B	162	33	18082	13.5294	0.970115	0.175247	0.173849
GOTERM_BP_DIRECT	GO:0031145~anaphase-promoting complex-dependent catabolic process	3	1.68539	0.00338306	CDC20, CUL3, FBXO31	162	10	18082	33.4852	0.978128	0.181719	0.180269
GOTERM_BP_DIRECT	GO:0090307~mitotic spindle assembly	4	2.24719	0.00367931	OFD1, CDC20, KIF2A, KIF11	162	35	18082	12.7563	0.98436	0.188648	0.187143
GOTERM_BP_DIRECT	GO:0060271~cilium morphogenesis	7	3.93258	0.00419949	OFD1, EHD1, UNC119B, IFT74, PCM1, KIF3A, CEP295	162	170	18082	4.59601	0.991322	0.194541	0.192989
GOTERM_BP_DIRECT	GO:0007346~regulation of mitotic cell cycle	4	2.24719	0.00431164	CDKN1C, RAD50, CKS2, SIRT1	162	37	18082	12.0667	0.992358	0.194541	0.192989
GOTERM_BP_DIRECT	GO:0000910~cytokinesis	4	2.24719	0.00431164	PRC1, INCENP, DSTN, KIF23	162	37	18082	12.0667	0.992358	0.194541	0.192989
GOTERM_BP_DIRECT	GO:0051276~chromosome organization	4	2.24719	0.00465095	RAD50, CDCA8, SMC4, SMC1B	162	38	18082	11.7492	0.994797	0.20178	0.20017
GOTERM_BP_DIRECT	GO:0030261~chromosome condensation	3	1.68539	0.00871103	TOP2A, NCAPD2, SMC4	162	16	18082	20.9282	0.999948	0.35093	0.34813
GOTERM_BP_DIRECT	GO:0031103~axon regeneration	3	1.68539	0.00871103	JUN, MTR, APOE	162	16	18082	20.9282	0.999948	0.35093	0.34813
GOTERM_BP_DIRECT	GO:0006357~regulation of transcription from RNA polymerase II promoter	10	5.61798	0.00929184	JUND, CITED2, CUL3, SUPT5, RAD21, FUBP1, CKS2, HIST1H1E, SAFB, KLF4	162	397	18082	2.81152	0.999973	0.361421	0.358537
GOTERM_BP_DIRECT	GO:0007064~mitotic sister chromatid cohesion	3	1.68539	0.00981519	CDC20, RAD21, WAPL	162	17	18082	19.6972	0.999985	0.369051	0.366107
GOTERM_BP_DIRECT	GO:0043046~DNA methylation involved in gamete generation	3	1.68539	0.010978	TDRD1, TDRKH, TDRD5	162	18	18082	18.6029	0.999996	0.399459	0.396272
GOTERM_BP_DIRECT	GO:0031047~gene silencing by RNA	4	2.24719	0.0117221	TNRC6C, TDRD1, TRIM71, TDRKH	162	53	18082	8.42395	0.999998	0.413204	0.409907
GOTERM_BP_DIRECT	GO:0007088~regulation of mitotic nuclear division	3	1.68539	0.0134753	CENPE, MKI67, KIF20B	162	20	18082	16.7426	1	0.428889	0.425467
GOTERM_BP_DIRECT	GO:0006259~DNA metabolic process	3	1.68539	0.0134753	TOP2A, PARP1, MKI67	162	20	18082	16.7426	1	0.428889	0.425467
GOTERM_BP_DIRECT	GO:0000122~negative regulation of transcription from RNA polymerase II promoter	14	7.86517	0.0135273	TLE4, CDKN1C, FOXC2, JUN, JUND, CITED2, CUL3, CTR9, KLF4, SIRT1, SUPT5, HIST1H1E, PPID, BPTF	162	729	18082	2.14354	1	0.428889	0.425467
GOTERM_BP_DIRECT	GO:0006334~nucleosome assembly	5	2.80899	0.0139926	ANP32E, HIST1H1E, HIST1H4D, HIST1H1A, HIST1H1B	162	104	18082	5.36622	1	0.428889	0.425467
GOTERM_BP_DIRECT	GO:0008283~cell proliferation	7	3.93258	0.0140682	FOXC2, CITED2, CKS2, SBDS, TACC3, MKI67, GLUL	162	220	18082	3.55146	1	0.428889	0.425467
GOTERM_BP_DIRECT	GO:0045944~positive regulation of transcription from RNA polymerase II promoter	17	9.55056	0.0160532	EGLN1, TOP2A, FOXC2, JUN, JUND, AUTS2, PARP1, CITED2, CTR9, GTF2F1, SAFB, KLF4, SIRT1, IFT74, SUPT5, TAF1, NCK1	162	995	18082	1.90703	1	0.466658	0.462935
GOTERM_BP_DIRECT	GO:0000070~mitotic sister chromatid segregation	3	1.68539	0.0176339	NUSAP1, CDCA8, NDC80	162	23	18082	14.5588	1	0.466658	0.462935
GOTERM_BP_DIRECT	GO:0051878~lateral element assembly	2	1.1236	0.017729	SYCP1, SYCP3	162	2	18082	111.617	1	0.466658	0.462935
GOTERM_BP_DIRECT	GO:0000915~actomyosin contractile ring assembly	2	1.1236	0.017729	RACGAP1, KIF23	162	2	18082	111.617	1	0.466658	0.462935
GOTERM_BP_DIRECT	GO:0018008~N-terminal peptidyl-glycine N-myristoylation	2	1.1236	0.017729	NMT1, NMT2	162	2	18082	111.617	1	0.466658	0.462935
GOTERM_BP_DIRECT	GO:0001701~in utero embryonic development	8	4.49438	0.0177893	CCNB1, MSH2, CITED2, KIF3A, CUL3, NMT1, RBBP6, TTN	162	299	18082	2.98642	1	0.466658	0.462935
GOTERM_BP_DIRECT	GO:0009612~response to mechanical stimulus	4	2.24719	0.018634	JUN, CCNB1, JUND, CITED2	162	63	18082	7.08681	1	0.468999	0.465257
GOTERM_BP_DIRECT	GO:0090316~positive regulation of intracellular protein transport	3	1.68539	0.0191258	PCM1, KIF3A, KIF20B	162	24	18082	13.9522	1	0.468999	0.465257
GOTERM_BP_DIRECT	GO:0007126~meiotic nuclear division	3	1.68539	0.0191258	SYCP3, MKI67, SMC1B	162	24	18082	13.9522	1	0.468999	0.465257
GOTERM_BP_DIRECT	GO:0048146~positive regulation of fibroblast proliferation	4	2.24719	0.0202354	CCNA2, JUN, CCNB1, WAPL	162	65	18082	6.86876	1	0.485649	0.481774
GOTERM_BP_DIRECT	GO:0008380~RNA splicing	7	3.93258	0.0210271	PRPF38B, PUF60, CD2BP2, CDK12, ZCRB1, HNRNPA1, SRSF10	162	241	18082	3.242	1	0.494137	0.490194
GOTERM_BP_DIRECT	GO:0007131~reciprocal meiotic recombination	3	1.68539	0.0255952	RAD50, MSH2, SYCP1	162	28	18082	11.959	1	0.589212	0.584511
GOTERM_BP_DIRECT	GO:0060623~regulation of chromosome condensation	2	1.1236	0.026476	CCNB1, WAPL	162	3	18082	74.4115	1	0.597298	0.592532
GOTERM_BP_DIRECT	GO:0006457~protein folding	5	2.80899	0.0276033	DNAJA1, HSP90AA1, TUBB5, P4HB, PPID	162	128	18082	4.36005	1	0.608219	0.603367
GOTERM_BP_DIRECT	GO:0042384~cilium assembly	5	2.80899	0.0282955	EHD1, IFT74, PCM1, KIF3A, CEP295	162	129	18082	4.32625	1	0.608219	0.603367
GOTERM_BP_DIRECT	GO:0001822~kidney development	5	2.80899	0.028998	CDKN1C, FOXC2, CENPF, CITED2, KIF3A	162	130	18082	4.29297	1	0.608219	0.603367
GOTERM_BP_DIRECT	GO:0007129~synapsis	3	1.68539	0.0291169	STAG3, SYCP1, SYCP3	162	30	18082	11.1617	1	0.608219	0.603367
GOTERM_BP_DIRECT	GO:0006974~cellular response to DNA damage stimulus	9	5.05618	0.0346012	TOP2A, RAD50, LIG1, MSH2, PARP1, RAD21, RBBP6, SIRT1, FBXO31	162	420	18082	2.3918	1	0.68352	0.678067
GOTERM_BP_DIRECT	GO:0000711~meiotic DNA repair synthesis	2	1.1236	0.0351455	SYCP1, SYCP3	162	4	18082	55.8086	1	0.68352	0.678067
GOTERM_BP_DIRECT	GO:0006499~N-terminal protein myristoylation	2	1.1236	0.0351455	NMT1, NMT2	162	4	18082	55.8086	1	0.68352	0.678067
GOTERM_BP_DIRECT	GO:0007066~female meiosis sister chromatid cohesion	2	1.1236	0.0351455	STAG3, SYCP3	162	4	18082	55.8086	1	0.68352	0.678067
GOTERM_BP_DIRECT	GO:0045132~meiotic chromosome segregation	2	1.1236	0.0437384	SMC4, WAPL	162	5	18082	44.6469	1	0.747529	0.741565
GOTERM_BP_DIRECT	GO:0016321~female meiosis chromosome segregation	2	1.1236	0.0437384	TTK, SYCP3	162	5	18082	44.6469	1	0.747529	0.741565
GOTERM_BP_DIRECT	GO:0010032~meiotic chromosome condensation	2	1.1236	0.0437384	NCAPD2, SMC4	162	5	18082	44.6469	1	0.747529	0.741565
GOTERM_BP_DIRECT	GO:0051304~chromosome separation	2	1.1236	0.0437384	TTK, NCAPD2	162	5	18082	44.6469	1	0.747529	0.741565
GOTERM_BP_DIRECT	GO:0007091~metaphase/anaphase transition of mitotic cell cycle	2	1.1236	0.0437384	TACC3, BUB1B	162	5	18082	44.6469	1	0.747529	0.741565
GOTERM_BP_DIRECT	GO:1990441~negative regulation of transcription from RNA polymerase II promoter in response to endoplasmic reticulum stress	2	1.1236	0.0437384	JUN, NCK1	162	5	18082	44.6469	1	0.747529	0.741565
GOTERM_BP_DIRECT	GO:0008054~negative regulation of cyclin-dependent protein serine/threonine kinase by cyclin degradation	2	1.1236	0.0437384	CUL3, FBXO31	162	5	18082	44.6469	1	0.747529	0.741565
GOTERM_BP_DIRECT	GO:0034502~protein localization to chromosome	2	1.1236	0.0437384	STAG3, TTK	162	5	18082	44.6469	1	0.747529	0.741565
GOTERM_BP_DIRECT	GO:0000278~mitotic cell cycle	3	1.68539	0.0449407	CENPE, CENPF, CUL3	162	38	18082	8.81189	1	0.756614	0.750578
GOTERM_BP_DIRECT	GO:0045787~positive regulation of cell cycle	3	1.68539	0.0492953	CENPF, CCNB1, CITED2	162	40	18082	8.3713	1	0.775577	0.769389
GOTERM_BP_DIRECT	GO:0007017~microtubule-based process	3	1.68539	0.0515277	TUBB5, DYNLL2, TUBA3A	162	41	18082	8.16712	1	0.775577	0.769389
GOTERM_BP_DIRECT	GO:0060964~regulation of gene silencing by miRNA	2	1.1236	0.0522552	TNRC6C, TRIM71	162	6	18082	37.2058	1	0.775577	0.769389
GOTERM_BP_DIRECT	GO:0045842~positive regulation of mitotic metaphase/anaphase transition	2	1.1236	0.0522552	CENPE, CUL3	162	6	18082	37.2058	1	0.775577	0.769389
GOTERM_BP_DIRECT	GO:0018401~peptidyl-proline hydroxylation to 4-hydroxy-L-proline	2	1.1236	0.0522552	EGLN1, P4HB	162	6	18082	37.2058	1	0.775577	0.769389
GOTERM_BP_DIRECT	GO:0035092~sperm chromatin condensation	2	1.1236	0.0522552	SYCP1, SYCP3	162	6	18082	37.2058	1	0.775577	0.769389
GOTERM_BP_DIRECT	GO:0034454~microtubule anchoring at centrosome	2	1.1236	0.0522552	PCM1, KIF3A	162	6	18082	37.2058	1	0.775577	0.769389
GOTERM_BP_DIRECT	GO:0051256~mitotic spindle midzone assembly	2	1.1236	0.0522552	RACGAP1, KIF23	162	6	18082	37.2058	1	0.775577	0.769389
GOTERM_BP_DIRECT	GO:0042769~DNA damage response, detection of DNA damage	2	1.1236	0.0522552	DNAJA1, PARP1	162	6	18082	37.2058	1	0.775577	0.769389
GOTERM_BP_DIRECT	GO:0035735~intraciliary transport involved in cilium morphogenesis	2	1.1236	0.0606966	IFT74, PCM1	162	7	18082	31.8907	1	0.877766	0.870763
GOTERM_BP_DIRECT	GO:0071168~protein localization to chromatin	2	1.1236	0.0606966	RAD21, WAPL	162	7	18082	31.8907	1	0.877766	0.870763
GOTERM_BP_DIRECT	GO:0071456~cellular response to hypoxia	4	2.24719	0.0643636	CCNA2, CCNB1, P4HB, SIRT1	162	103	18082	4.33465	1	0.91651	0.909198
GOTERM_BP_DIRECT	GO:0007568~aging	5	2.80899	0.0688468	SLC12A2, CDKN1C, JUN, JUND, APOE	162	173	18082	3.22593	1	0.91651	0.909198
GOTERM_BP_DIRECT	GO:0051026~chiasma assembly	2	1.1236	0.0690633	SYCP1, SYCP3	162	8	18082	27.9043	1	0.91651	0.909198
GOTERM_BP_DIRECT	GO:1902237~positive regulation of endoplasmic reticulum stress-induced intrinsic apoptotic signaling pathway	2	1.1236	0.0690633	SIRT1, NCK1	162	8	18082	27.9043	1	0.91651	0.909198
GOTERM_BP_DIRECT	GO:0051103~DNA ligation involved in DNA repair	2	1.1236	0.0690633	LIG1, PARP1	162	8	18082	27.9043	1	0.91651	0.909198
GOTERM_BP_DIRECT	GO:1900364~negative regulation of mRNA polyadenylation	2	1.1236	0.0690633	SUPT5, CTR9	162	8	18082	27.9043	1	0.91651	0.909198
GOTERM_BP_DIRECT	GO:0006265~DNA topological change	2	1.1236	0.0690633	TOP2A, TOP1	162	8	18082	27.9043	1	0.91651	0.909198
GOTERM_BP_DIRECT	GO:0008608~attachment of spindle microtubules to kinetochore	2	1.1236	0.0773559	CENPE, NDC80	162	9	18082	24.8038	1	1	0.992902
GOTERM_BP_DIRECT	GO:0022027~interkinetic nuclear migration	2	1.1236	0.0773559	PCM1, TACC3	162	9	18082	24.8038	1	1	0.992902
GOTERM_BP_DIRECT	GO:0051726~regulation of cell cycle	4	2.24719	0.0783926	JUN, JUND, CSNK2A2, TACC3	162	112	18082	3.98633	1	1	0.992902
GOTERM_BP_DIRECT	GO:0007507~heart development	6	3.37079	0.0841154	FOXC2, IFT74, CENPF, CITED2, KIF3A, TTN	162	261	18082	2.56591	1	1	0.992902
GOTERM_BP_DIRECT	GO:0034501~protein localization to kinetochore	2	1.1236	0.0855751	BUB1B, TTK	162	10	18082	22.3235	1	1	0.992902
GOTERM_BP_DIRECT	GO:0017145~stem cell division	2	1.1236	0.0855751	CUL3, FUBP1	162	10	18082	22.3235	1	1	0.992902
GOTERM_BP_DIRECT	GO:0000183~chromatin silencing at rDNA	3	1.68539	0.0861732	TAF1D, HIST1H4D, SIRT1	162	55	18082	6.08822	1	1	0.992902
GOTERM_BP_DIRECT	GO:0070301~cellular response to hydrogen peroxide	3	1.68539	0.0915734	AKR1B3, KLF4, SIRT1	162	57	18082	5.87459	1	1	0.992902
GOTERM_BP_DIRECT	GO:0070201~regulation of establishment of protein localization	2	1.1236	0.0937216	CENPF, KIF20B	162	11	18082	20.2941	1	1	0.992902
GOTERM_BP_DIRECT	GO:0042542~response to hydrogen peroxide	3	1.68539	0.0943099	JUN, LIG1, SIRT1	162	58	18082	5.77331	1	1	0.992902
GOTERM_BP_DIRECT	GO:0006260~DNA replication	4	2.24719	0.0971736	ORC6, LIG1, RBBP6, TOP1	162	123	18082	3.62983	1	1	0.992902

## Sheet: Figure 6A-B USPG1-up
USPG1-up
	p_val	avg_log2FC	pct.1	pct.2	p_val_adj
Rpl13	2.65e-16	-0.250036	1	1	6.18e-12
Twist1	5.96e-05	-0.250304	0.443	0.626	1
Gm45716	0.00167812	-0.250686	0.941	0.949	1
Uqcr10	0.000109408	-0.250821	0.98	0.978	1
Tomm20	2.24e-06	-0.252282	0.97	0.989	0.0521329
Jarid2	0.000114605	-0.253127	0.788	0.883	1
Pdhb	5.68e-05	-0.25389	0.64	0.758	1
Lhx1	0.00663555	-0.254603	0.468	0.553	1
Cfl1	2.09e-06	-0.255289	0.995	0.985	0.0487023
Fam162a	1.5e-05	-0.25543	0.911	0.941	0.349169
Fbxo9	7.59e-05	-0.256129	0.852	0.901	1
Ncor2	0.000288329	-0.256291	0.734	0.817	1
Nhp2	1.96e-06	-0.257654	0.97	0.967	0.0456218
Etv4	6.94e-05	-0.257863	0.532	0.645	1
Gtpbp4	8.54e-08	-0.25804	0.985	0.989	0.00199049
Capza2	4.04e-05	-0.259571	0.852	0.905	0.941789
Uqcrq	6.07e-05	-0.25983	0.975	0.974	1
Cks1b	3.29e-06	-0.259855	0.97	0.963	0.0766159
Zfp467	8.6e-05	-0.259864	0.581	0.736	1
Abracl	6.42e-05	-0.25987	0.379	0.542	1
Fibp	3.95e-05	-0.261219	0.744	0.824	0.921727
Mtch1	9.91e-05	-0.261675	0.709	0.795	1
Imp3	8.74e-08	-0.262273	0.911	0.919	0.00203663
Cox8a	4.58e-07	-0.26277	1	0.996	0.0106795
Fam53a	7.32e-06	-0.263097	0.581	0.747	0.170532
Sms	7.38e-06	-0.263208	0.355	0.542	0.172074
Foxn3	2.18e-05	-0.263763	0.581	0.751	0.508783
Rora	1.24e-06	-0.263789	0.345	0.549	0.0289299
Dcun1d5	8.44e-06	-0.265436	0.936	0.96	0.196646
2310039H08Rik	1.78e-05	-0.265719	0.591	0.718	0.414202
Fyn	2.61e-06	-0.265947	0.906	0.93	0.060855
Tnfsf12	9.7e-08	-0.266198	0.172	0.399	0.0022604
Becn1	1.01e-05	-0.266816	0.611	0.762	0.234327
Dnajc15	1.98e-05	-0.266832	0.67	0.799	0.461286
Laptm4a	1.15e-06	-0.267514	0.852	0.916	0.0268844
Glod4	2.1e-06	-0.268468	0.542	0.711	0.0488482
Jade1	0.000791156	-0.269146	0.754	0.813	1
Igf2bp1	7.53e-05	-0.269833	0.818	0.879	1
Nme1	5.48e-10	-0.26984	1	1	1.28e-05
Smim14	3.25e-06	-0.270334	0.645	0.802	0.0758116
Ube2e3	6.98e-07	-0.271274	0.906	0.927	0.0162731
Klhdc2	0.00036031	-0.271694	0.803	0.846	1
Mrpl43	1.32e-05	-0.272644	0.842	0.886	0.307115
Xpa	1.02e-09	-0.273261	0.167	0.436	2.38e-05
Tmem30a	4.93e-06	-0.274363	0.424	0.586	0.114991
Mest	4.13e-06	-0.274525	0.355	0.546	0.0963186
Rpl39	1.81e-05	-0.274804	0.995	0.996	0.421312
Lsm4	9.83e-12	-0.274948	1	0.993	2.29e-07
Rap1a	1.26e-05	-0.276115	0.788	0.85	0.292944
Ppp1ca	3.4e-09	-0.276823	0.995	0.996	7.93e-05
Shmt2	2.46e-06	-0.276854	0.601	0.758	0.057252
Trappc6b	1.82e-05	-0.277055	0.557	0.7	0.424034
Alkbh2	6.64e-06	-0.277588	0.626	0.784	0.154815
Kif21a	2.24e-06	-0.278732	0.207	0.41	0.052107
Vdac2	2.41e-06	-0.278981	0.911	0.923	0.0562807
Npm3	1.63e-07	-0.279502	0.951	0.971	0.00380637
Atp5h	1.39e-07	-0.279827	1	0.993	0.00324883
Rex1bd	6.55e-07	-0.281815	0.882	0.927	0.0152661
Pomp	1.33e-07	-0.281945	1	0.996	0.00310312
Romo1	7.17e-06	-0.281962	0.941	0.974	0.167038
Rheb	6.2e-08	-0.28233	0.867	0.905	0.00144486
Msn	9.01e-05	-0.284991	0.493	0.652	1
Anp32b	2.13e-14	-0.285118	1	0.996	4.96e-10
Acp1	8.49e-06	-0.285285	0.788	0.875	0.197837
Vti1b	1.35e-06	-0.286258	0.675	0.832	0.0314951
Glrx2	0.000126066	-0.287304	0.591	0.725	1
Rprml	6.13e-08	-0.288277	0.212	0.443	0.00142897
Gng5	2.79e-13	-0.290536	1	1	6.5e-09
Mrpl58	3.09e-06	-0.290708	0.867	0.927	0.0720679
Marcksl1	7.41e-08	-0.290761	0.966	0.971	0.00172636
Rpl36al	2.17e-11	-0.292562	1	0.996	5.05e-07
Rps27l	1.27e-06	-0.295256	0.97	0.985	0.0295138
Mrpl52	3.64e-09	-0.295907	0.995	0.993	8.49e-05
Hmga1	3.4e-07	-0.29618	0.468	0.689	0.00791404
Ubxn4	2.18e-09	-0.297826	0.951	0.982	5.08e-05
Sec61b	8.51e-06	-0.300278	0.906	0.919	0.198389
Syngr2	6.39e-08	-0.300328	0.222	0.451	0.00149013
Mrps33	6.69e-09	-0.300435	0.926	0.941	0.000156003
Dph3	8.36e-08	-0.302294	0.956	0.967	0.00194859
Cdca7	2.62e-07	-0.302751	0.956	0.96	0.0061035
Sox4	1.5e-06	-0.302795	0.97	0.974	0.0349477
Guk1	1.84e-06	-0.304185	0.803	0.894	0.0427901
Eno1	1.02e-06	-0.307383	0.833	0.908	0.0238224
H2afj	1e-05	-0.309204	0.675	0.817	0.234155
Cox18	7.78e-08	-0.313172	0.478	0.689	0.00181416
Nme2	5.72e-12	-0.313463	1	0.996	1.33e-07
Dtymk	1.82e-07	-0.313925	0.837	0.89	0.00424171
Dlk1	4.56e-06	-0.315342	0.419	0.59	0.106299
Klk8	3.14e-06	-0.315881	0.419	0.601	0.0731065
Tmem160	1.68e-06	-0.317654	0.941	0.941	0.0390973
Dab1	1.06e-10	-0.319066	0.271	0.546	2.48e-06
Eif2s1	2.13e-07	-0.320673	0.867	0.93	0.00495762
Vapa	6.8e-10	-0.320891	0.975	0.982	1.59e-05
Parp8	6.28e-07	-0.32135	0.463	0.648	0.0146374
Fcer1g	9.7e-09	-0.321569	0.212	0.454	0.000226136
Sohlh2	4.47e-08	-0.322998	0.409	0.623	0.0010426
Serp2	3.65e-08	-0.323333	0.468	0.696	0.000851337
Atp5g2	1.92e-10	-0.323596	0.995	0.993	4.46e-06
Rhox2a	5.48e-06	-0.32432	0.325	0.505	0.127815
Lat	9.25e-10	-0.325664	0.241	0.498	2.16e-05
Eif4ebp1	2.18e-08	-0.326276	0.887	0.945	0.000507505
Egr1	0.000345172	-0.326864	0.759	0.821	1
Timm23	4.65e-10	-0.326986	1	0.989	1.08e-05
Hist1h4i	2.75e-06	-0.327834	0.473	0.663	0.0640879
Rnasek	3.76e-08	-0.33105	0.601	0.78	0.000876497
Atp5f1	5.9e-10	-0.333526	0.985	0.996	1.37e-05
Ube2e1	6.47e-09	-0.333881	0.754	0.868	0.000150916
H2afz	7.47e-11	-0.335688	1	0.996	1.74e-06
Krcc1	8.89e-08	-0.337783	0.399	0.637	0.00207245
Yrdc	1.11e-06	-0.338	0.66	0.828	0.0258934
Phlda1	1.94e-06	-0.340185	0.286	0.495	0.0452618
Ppic	1.27e-07	-0.341181	0.404	0.601	0.00296362
Bin1	1.31e-08	-0.341488	0.635	0.806	0.000306476
Mt3	7.67e-11	-0.341789	0.143	0.421	1.79e-06
Tmsb10	1.38e-06	-0.345221	1	1	0.0321262
Mrps34	1.5e-09	-0.346329	0.448	0.7	3.5e-05
Afp	2.49e-06	-0.352424	0.936	0.952	0.0580492
Gtf2a2	4.54e-10	-0.355987	0.537	0.758	1.06e-05
Kank3	8.41e-10	-0.35899	0.32	0.586	1.96e-05
Gclm	4.84e-09	-0.359046	0.931	0.956	0.000112731
Txn1	1.98e-06	-0.360872	0.882	0.938	0.0461355
Prrx2	1.21e-06	-0.361522	0.315	0.542	0.0282709
Sfrp2	3.87e-07	-0.362084	0.675	0.817	0.00902311
Bax	3.12e-10	-0.364203	0.975	0.982	7.28e-06
Gsta3	7.53e-09	-0.366844	0.325	0.546	0.000175538
S100a10	2.69e-07	-0.367551	0.281	0.484	0.00626641
Uchl5	1.15e-07	-0.370236	0.778	0.85	0.00267085
Cdk4	2.73e-11	-0.37027	0.985	0.96	6.36e-07
Atp5e	4.64e-12	-0.370957	1	0.996	1.08e-07
Sp3os	1.31e-08	-0.371337	0.419	0.656	0.000304234
Polr1d	1.04e-12	-0.375855	0.961	0.974	2.41e-08
Cst3	2.9e-08	-0.377004	0.961	0.989	0.000675882
Bcl6b	3.62e-06	-0.377652	0.31	0.509	0.0842978
Fbn2	4.58e-09	-0.383893	0.478	0.689	0.000106714
Txnrd1	1.35e-08	-0.384469	0.916	0.934	0.000314825
Pfn1	1.15e-15	-0.393164	1	1	2.68e-11
Fst	4.75e-05	-0.393807	0.601	0.692	1
Odc1	2.16e-06	-0.396524	0.793	0.853	0.0504347
Scand1	2.59e-10	-0.398479	0.7	0.85	6.04e-06
Mettl23	2.17e-07	-0.400832	0.685	0.821	0.00506333
Tmem59	6.81e-10	-0.401514	0.808	0.861	1.59e-05
Zfp936	2.88e-12	-0.403129	0.33	0.656	6.71e-08
Espn	6.37e-10	-0.407293	0.261	0.52	1.48e-05
Nefm	9.08e-05	-0.41313	0.837	0.897	1
Ndufa1	3.47e-11	-0.414841	0.709	0.905	8.09e-07
Ptgr1	2.39e-07	-0.418062	0.542	0.755	0.00557413
Tomm5	2.65e-09	-0.423681	0.581	0.773	6.17e-05
Rhoc	1.76e-08	-0.42529	0.537	0.725	0.000409338
Chic2	5.47e-14	-0.426192	0.985	0.971	1.28e-09
Tmem59l	1.53e-11	-0.430624	0.374	0.659	3.56e-07
Ftl1	3.16e-20	-0.437947	1	1	7.37e-16
Hhex	3.61e-10	-0.446684	0.759	0.897	8.41e-06
Ifitm2	7.41e-11	-0.456653	0.384	0.659	1.73e-06
Mdk	1.1e-09	-0.460007	0.399	0.641	2.58e-05
Ak6	7.89e-12	-0.460644	0.714	0.886	1.84e-07
Ssbp4	2.37e-10	-0.461542	0.847	0.923	5.53e-06
Cd63	5.1e-13	-0.465363	0.552	0.85	1.19e-08
Tgfb1	1.08e-11	-0.466162	0.443	0.692	2.52e-07
Emb	3.87e-14	-0.483162	0.34	0.685	9.01e-10
Slc25a5	3.63e-13	-0.489803	0.877	0.974	8.47e-09
Fth1	2.67e-23	-0.51109	1	1	6.23e-19
Gm47283	9.56e-08	-0.526596	0.704	0.788	0.00222935
Rasgrp2	5.5e-13	-0.534851	0.867	0.967	1.28e-08
Mt2	9.29e-16	-0.544694	0.995	1	2.17e-11
Uba52	1.5e-16	-0.558912	0.99	0.996	3.51e-12
Chchd10	1.47e-13	-0.574752	0.759	0.908	3.42e-09
Tle5	4.81e-16	-0.588249	0.847	0.941	1.12e-11
Ramp2	5.26e-18	-0.593372	0.207	0.59	1.23e-13
Gm10076	1.26e-27	-0.623179	1	1	2.94e-23
Egr4	9.34e-15	-0.636433	0.798	0.905	2.18e-10
Gsta4	1.16e-14	-0.659731	0.818	0.945	2.7e-10
Crlf1	1.76e-22	-0.679591	0.818	0.956	4.11e-18
Mt1	5.57e-20	-0.715329	1	1	1.3e-15
Ccnd2	2.19e-23	-0.721746	0.975	1	5.1e-19
1500009L16Rik	2.73e-25	-0.837851	0.744	0.938	6.35e-21

## Sheet: up-GO
GO
Term	Count	%	PValue	Genes	List Total	Pop Hits	Pop Total	Fold Enrichment	Bonferroni	Benjamini	FDR
GO:0015986~ATP synthesis coupled proton transport	4	2.33918	0.00100102	ATP5E, ATP5H, ATP5G2, ATP5F1	158	23	18082	19.9031	0.719712	0.440165	0.439472
GO:0098779~mitophagy in response to mitochondrial depolarization	7	4.09357	0.00103727	COX8A, BECN1, NME2, NEFM, EIF2S1, KRCC1, LSM4	158	132	18082	6.06895	0.732333	0.440165	0.439472
GO:0009611~response to wounding	5	2.92398	0.00161212	HHEX, TGFB1, MDK, BAX, KLK8	158	58	18082	9.86578	0.871141	0.440165	0.439472
GO:0051099~positive regulation of binding	3	1.75439	0.00202676	DPH3, ENO1, S100A10	158	8	18082	42.9161	0.923968	0.440165	0.439472
GO:0006163~purine nucleotide metabolic process	3	1.75439	0.00202676	GUK1, NME2, NME1	158	8	18082	42.9161	0.923968	0.440165	0.439472
GO:0006412~translation	11	6.43275	0.0026817	MRPL52, RPL36AL, NHP2, RPS27L, RPL13, MRPL58, SLC25A5, EIF2S1, RPL39, UBA52, MRPL43	158	401	18082	3.13934	0.96697	0.440165	0.439472
GO:0043524~negative regulation of neuron apoptotic process	7	4.09357	0.00275521	MDK, BAX, FYN, MT1, GCLM, MT3, CRLF1	158	160	18082	5.00688	0.969921	0.440165	0.439472
GO:0008284~positive regulation of cell proliferation	13	7.60234	0.00277269	MARCKSL1, TGFB1, SHMT2, ODC1, CST3, CCND2, SFRP2, CDK4, ROMO1, ANP32B, SLC25A5, CRLF1, SOX4	158	542	18082	2.74494	0.970584	0.440165	0.439472
GO:0050679~positive regulation of epithelial cell proliferation	5	2.92398	0.00432222	TGFB1, CCND2, NME2, TWIST1, NME1	158	76	18082	7.52915	0.995918	0.593044	0.59211
GO:0010038~response to metal ion	3	1.75439	0.00466964	MT2, MT1, MT3	158	12	18082	28.6108	0.997379	0.593044	0.59211
GO:0001666~response to hypoxia	7	4.09357	0.00667982	CST3, BECN1, EGR1, RAMP2, TGFB1, MT3, SOX4	158	192	18082	4.1724	0.999799	0.757087	0.755894
GO:0042981~regulation of apoptotic process	7	4.09357	0.00790166	EGR1, TGFB1, SFRP2, NME2, BAX, FYN, NME1	158	199	18082	4.02563	0.999958	0.757087	0.755894
GO:0001657~ureteric bud development	4	2.33918	0.00834584	TGFB1, GSTA3, LHX1, CRLF1	158	48	18082	9.53692	0.999976	0.757087	0.755894
GO:0045599~negative regulation of fat cell differentiation	4	2.33918	0.00834584	NCOR2, TGFB1, RORA, DLK1	158	48	18082	9.53692	0.999976	0.757087	0.755894
GO:0043065~positive regulation of apoptotic process	9	5.26316	0.00901405	MTCH1, TGFB1, SFRP2, BIN1, CDK4, FAM162A, BAX, PHLDA1, SOX4	158	335	18082	3.07459	0.99999	0.76319	0.761988
GO:0042493~response to drug	9	5.26316	0.00964055	CST3, BECN1, TGFB1, DAB1, SFRP2, CDK4, MDK, FYN, GCLM	158	339	18082	3.03831	0.999995	0.765219	0.764014
GO:0006882~cellular zinc ion homeostasis	3	1.75439	0.0104622	MT2, MT1, MT3	158	18	18082	19.0738	0.999998	0.781587	0.780357
GO:1902600~hydrogen ion transmembrane transport	3	1.75439	0.0116269	COX8A, UQCR10, ATP5G2	158	19	18082	18.07	1	0.817385	0.816097
GO:0071456~cellular response to hypoxia	5	2.92398	0.0124489	FAM162A, EIF4EBP1, TWIST1, RORA, MT3	158	103	18082	5.55549	1	0.817385	0.816097
GO:0045944~positive regulation of transcription from RNA polymerase II promoter	17	9.94152	0.0128722	EGR1, GTF2A2, ZFP467, TGFB1, EGR4, H2AFZ, HMGA1, NME2, TWIST1, RORA, ETV4, HHEX, SFRP2, SOHLH2, PFN1, SSBP4, SOX4	158	995	18082	1.95531	1	0.817385	0.816097
GO:0015992~proton transport	4	2.33918	0.0139825	ATP5E, ATP5H, ATP5G2, ATP5F1	158	58	18082	7.89262	1	0.832657	0.831346
GO:0042127~regulation of cell proliferation	7	4.09357	0.014424	HHEX, TGFB1, SFRP2, CDK4, CDCA7, FYN, JARID2	158	227	18082	3.52908	1	0.832657	0.831346
GO:0000082~G1/S transition of mitotic cell cycle	4	2.33918	0.0167143	CCND2, CDK4, EIF4EBP1, ANP32B	158	62	18082	7.38342	1	0.866722	0.865357
GO:0006754~ATP biosynthetic process	3	1.75439	0.0168174	TGFB1, ATP5E, CHCHD10	158	23	18082	14.9274	1	0.866722	0.865357
GO:0097327~response to antineoplastic agent	2	1.16959	0.0172904	RAP1A, PTGR1	158	2	18082	114.443	1	0.866722	0.865357
GO:0071363~cellular response to growth factor stimulus	4	2.33918	0.0181842	DTYMK, TGFB1, TWIST1, PFN1	158	64	18082	7.15269	1	0.866722	0.865357
GO:0010033~response to organic substance	4	2.33918	0.0189453	TGFB1, RPL36AL, CDK4, GLRX2	158	65	18082	7.04265	1	0.866722	0.865357
GO:0008285~negative regulation of cell proliferation	9	5.26316	0.0191088	BECN1, TGFB1, SFRP2, FTH1, HMGA1, BAX, JARID2, GTPBP4, SOX4	158	384	18082	2.68226	1	0.866722	0.865357
GO:0006919~activation of cysteine-type endopeptidase activity involved in apoptotic process	4	2.33918	0.0205199	MTCH1, FAM162A, BAX, ANP32B	158	67	18082	6.83242	1	0.89863	0.897215
GO:0071333~cellular response to glucose stimulus	4	2.33918	0.0238788	RAP1A, NME2, GCLM, SOX4	158	71	18082	6.4475	1	0.993829	0.992264
GO:0006810~transport	25	14.6199	0.0252442	TXN1, MTCH1, CD63, RAMP2, UQCR10, AFP, ATP5H, ATP5G2, TOMM20, SERP2, LAPTM4A, ATP5E, IGF2BP1, SEC61B, VTI1B, TMEM30A, NDUFA1, GLRX2, DNAJC15, ATP5F1, UQCRQ, TRAPPC6B, VDAC2, SLC25A5, TOMM5	158	1822	18082	1.57029	1	0.993829	0.992264
GO:0097477~lateral motor column neuron migration	2	1.16959	0.0258239	DAB1, LHX1	158	3	18082	76.2954	1	0.993829	0.992264
GO:0002762~negative regulation of myeloid leukocyte differentiation	2	1.16959	0.0258239	NME2, NME1	158	3	18082	76.2954	1	0.993829	0.992264
GO:0006979~response to oxidative stress	5	2.92398	0.0287861	CST3, TXNRD1, XPA, GCLM, MT3	158	133	18082	4.30237	1	1	0.999212
GO:0045893~positive regulation of transcription, DNA-templated	11	6.43275	0.02895	EGR1, TGFB1, MDK, LHX1, HMGA1, RORA, FOXN3, ETV4, MT3, SOX4, CKS1B	158	576	18082	2.18554	1	1	0.999212
GO:0000060~protein import into nucleus, translocation	3	1.75439	0.0313404	TGFB1, SEC61B, MT3	158	32	18082	10.729	1	1	0.999212
GO:0010976~positive regulation of neuron projection development	5	2.92398	0.0323479	RAP1A, TMEM30A, NME2, FYN, NME1	158	138	18082	4.14649	1	1	0.999212
GO:0010273~detoxification of copper ion	2	1.16959	0.0342838	MT2, MT1	158	4	18082	57.2215	1	1	0.999212
GO:0009636~response to toxic substance	4	2.33918	0.0389531	CST3, CDK4, XPA, BAX	158	86	18082	5.32293	1	1	0.999212
GO:0030154~cell differentiation	13	7.60234	0.0394103	TNFSF12, TWIST1, FOXN3, DLK1, NME1, HHEX, DAB1, SFRP2, BIN1, MDK, LHX1, SOHLH2, JARID2	158	780	18082	1.90738	1	1	0.999212
GO:0006875~cellular metal ion homeostasis	2	1.16959	0.0426706	MT1, MT3	158	5	18082	45.7772	1	1	0.999212
GO:0097191~extrinsic apoptotic signaling pathway	3	1.75439	0.0492677	TGFB1, TNFSF12, BAX	158	41	18082	8.37388	1	1	0.999212
GO:0030217~T cell differentiation	3	1.75439	0.0492677	EGR1, TGFB1, SOX4	158	41	18082	8.37388	1	1	0.999212
GO:0031397~negative regulation of protein ubiquitination	3	1.75439	0.0492677	FYN, GTPBP4, SOX4	158	41	18082	8.37388	1	1	0.999212
GO:0060762~regulation of branching involved in mammary gland duct morphogenesis	2	1.16959	0.0509851	TGFB1, ETV4	158	6	18082	38.1477	1	1	0.999212
GO:1903799~negative regulation of production of miRNAs involved in gene silencing by miRNA	2	1.16959	0.0509851	NCOR2, TGFB1	158	6	18082	38.1477	1	1	0.999212
GO:0001843~neural tube closure	4	2.33918	0.0524345	TGFB1, SFRP2, TWIST1, PFN1	158	97	18082	4.7193	1	1	0.999212
GO:0032355~response to estradiol	4	2.33918	0.0578254	CST3, NCOR2, RAMP2, TGFB1	158	101	18082	4.5324	1	1	0.999212
GO:0071229~cellular response to acid chemical	2	1.16959	0.0592278	ENO1, S100A10	158	7	18082	32.698	1	1	0.999212
GO:0021517~ventral spinal cord development	2	1.16959	0.0592278	DAB1, LHX1	158	7	18082	32.698	1	1	0.999212
GO:0006915~apoptotic process	10	5.84795	0.0609105	CST3, BECN1, MTCH1, SFRP2, FAM162A, TNFSF12, JADE1, CDCA7, BAX, PHLDA1	158	570	18082	2.00777	1	1	0.999212
GO:0010942~positive regulation of cell death	3	1.75439	0.0651844	EGR1, TXNRD1, MT3	158	48	18082	7.15269	1	1	0.999212
GO:0045892~negative regulation of transcription, DNA-templated	10	5.84795	0.0658356	NCOR2, HHEX, TGFB1, SFRP2, LHX1, HMGA1, TWIST1, FOXN3, JARID2, MT3	158	579	18082	1.97656	1	1	0.999212
GO:0006220~pyrimidine nucleotide metabolic process	2	1.16959	0.0673994	NME2, NME1	158	8	18082	28.6108	1	1	0.999212
GO:0002576~platelet degranulation	2	1.16959	0.0673994	CFL1, PFN1	158	8	18082	28.6108	1	1	0.999212
GO:0046826~negative regulation of protein export from nucleus	2	1.16959	0.0673994	TXN1, SOX4	158	8	18082	28.6108	1	1	0.999212
GO:0003183~mitral valve morphogenesis	2	1.16959	0.0673994	TWIST1, SOX4	158	8	18082	28.6108	1	1	0.999212
GO:0048642~negative regulation of skeletal muscle tissue development	2	1.16959	0.0673994	TGFB1, TWIST1	158	8	18082	28.6108	1	1	0.999212
GO:0006749~glutathione metabolic process	3	1.75439	0.0675823	GSTA4, GSTA3, GCLM	158	49	18082	7.00672	1	1	0.999212
GO:0006228~UTP biosynthetic process	2	1.16959	0.0755004	NME2, NME1	158	9	18082	25.4318	1	1	0.999212
GO:2001214~positive regulation of vasculogenesis	2	1.16959	0.0755004	RAMP2, RAP1A	158	9	18082	25.4318	1	1	0.999212
GO:0006241~CTP biosynthetic process	2	1.16959	0.0755004	NME2, NME1	158	9	18082	25.4318	1	1	0.999212
GO:0071481~cellular response to X-ray	2	1.16959	0.0835315	CCND2, SFRP2	158	10	18082	22.8886	1	1	0.999212
GO:0090009~primitive streak formation	2	1.16959	0.0835315	HHEX, LHX1	158	10	18082	22.8886	1	1	0.999212
GO:0006417~regulation of translation	4	2.33918	0.0884182	IGF2BP1, EIF4EBP1, EIF2S1, PPP1CA	158	121	18082	3.78324	1	1	0.999212
GO:0048853~forebrain morphogenesis	2	1.16959	0.0914933	HHEX, UCHL5	158	11	18082	20.8078	1	1	0.999212
GO:0006880~intracellular sequestering of iron ion	2	1.16959	0.0914933	FTL1, FTH1	158	11	18082	20.8078	1	1	0.999212
GO:0060068~vagina development	2	1.16959	0.0914933	LHX1, BAX	158	11	18082	20.8078	1	1	0.999212
GO:0006183~GTP biosynthetic process	2	1.16959	0.0914933	NME2, NME1	158	11	18082	20.8078	1	1	0.999212
GO:0001764~neuron migration	4	2.33918	0.0934952	DAB1, TWIST1, BAX, FYN	158	124	18082	3.69171	1	1	0.999212
GO:0007219~Notch signaling pathway	4	2.33918	0.0952139	HHEX, TGFB1, UBA52, DLK1	158	125	18082	3.66218	1	1	0.999212
GO:0071276~cellular response to cadmium ion	2	1.16959	0.0993864	MT2, MT3	158	12	18082	19.0738	1	1	0.999212
GO:0032801~receptor catabolic process	2	1.16959	0.0993864	BECN1, TGFB1	158	12	18082	19.0738	1	1	0.999212
GO:0071294~cellular response to zinc ion	2	1.16959	0.0993864	MT2, MT1	158	12	18082	19.0738	1	1	0.999212
GO:0042989~sequestering of actin monomers	2	1.16959	0.0993864	PFN1, TMSB10	158	12	18082	19.0738	1	1	0.999212
GO:0045926~negative regulation of growth	2	1.16959	0.0993864	MT2, MT1	158	12	18082	19.0738	1	1	0.999212
GO:0009142~nucleoside triphosphate biosynthetic process	2	1.16959	0.0993864	NME2, NME1	158	12	18082	19.0738	1	1	0.999212
