# Supplementary material for: SRSF10 is essential for progenitor spermatogonia expansion by regulating alternative splicing
Source: eLife journal article supplement (doi:10.7554/elife.78211), 2022-10-24
Supplement: fig6-data2 [file Figure 6-source data 2.xlsx]

## Sheet: Figure 6E
Figure 6E-source data: Quantification of the ratio of KI67+PLZF+ cells in PLZF+ cells in control and Srsf10-cKO testes at P6.
							The detailed information of Figure 6E
		PLZF+KI67+/PLZF+							Control 1-1			Control 1-2			Control 1-3			Control 1-4			Control 1-5			Control 2-1			Control 2-2			Control 2-3			Control 2-4			Control 2-5			Control 3-1			Control 3-2			Control 3-3			Control 3-4
		Control	Srsf10-cKO						PLZF+KI67+	PLZF+	PLZF+KI67+/PLZF+	PLZF+KI67+	PLZF+	PLZF+KI67+/PLZF+	PLZF+KI67+	PLZF+	PLZF+KI67+/PLZF+	PLZF+KI67+	PLZF+	PLZF+KI67+/PLZF+	PLZF+KI67+	PLZF+	PLZF+KI67+/PLZF+	PLZF+KI67+	PLZF+	PLZF+KI67+/PLZF+	PLZF+KI67+	PLZF+	PLZF+KI67+/PLZF+	PLZF+KI67+	PLZF+	PLZF+KI67+/PLZF+	PLZF+KI67+	PLZF+	PLZF+KI67+/PLZF+	PLZF+KI67+	PLZF+	PLZF+KI67+/PLZF+	PLZF+KI67+	PLZF+	PLZF+KI67+/PLZF+	PLZF+KI67+	PLZF+	PLZF+KI67+/PLZF+	PLZF+KI67+	PLZF+	PLZF+KI67+/PLZF+	PLZF+KI67+	PLZF+
		0.918092	0.972049					tubule-1	7	7	1	2	2	1	7	9	0.777778	2	3	0.666667	5	5	1	3	3	1	8	8	1	2	2	1	4	5	0.8	2	2	1	3	4	0.75	2	2	1	2	2	1	11	11
		0.972491	0.973239					tubule-2	9	9	1	4	4	1	5	8	0.625	6	7	0.857143	6	6	1	3	3	1	1	1	1	2	2	1	4	4	1	8	8	1	4	4	1	2	2	1	3	3	1	5	5
		0.978638	0.957254					tubule-3	9	10	0.9	2	2	1	4	4	1	1	1	1	8	9	0.888889	2	2	1	12	12	1	1	1	1	2	2	1	5	6	0.833333	9	9	1	2	2	1	4	4	1	5	5
	mean	0.956407	0.967514					tubule-4	5	6	0.833333	6	7	0.857143	4	4	1	2	3	0.666667	5	5	1	2	2	1	4	5	0.8	4	5	0.8	3	3	1	11	11	1	2	2	1	2	2	1	3	3	1	4	5
	T-test	0.626886						tubule-5	8	9	0.888889	10	10	1	3	4	0.75	4	4	1	4	4	1	2	2	1	4	4	1	3	3	1	2	2	1	6	8	0.75	1	1	1	4	4	1	1	1	1	5	6
								tubule-6	3	4	0.75	7	7	1	5	5	1	5	6	0.833333	7	7	1	1	1	1	8	8	1	6	6	1	3	3	1	3	3	1	2	2	1	1	1	1	2	2	1	6	6
								tubule-7				9	9	1	6	6	1	4	4	1	4	4	1	4	4	1	5	5	1	4	4	1	7	7	1	8	8	1	3	3	1	1	1	1	4	5	0.8	3	3
								tubule-8				5	6	0.833333	2	2	1	2	4	0.5	5	5	1				4	4	1	3	3	1	6	6	1	6	6	1	3	3	1	4	4	1	3	3	1	1	1
								tubule-9				8	11	0.727273	7	10	0.7	5	5	1	5	5	1							9	10	0.9	5	5	1	12	12	1	8	8	1	2	2	1	2	2	1	1	1
	PLZF+KI67+/PLZF+	mean		PLZF+KI67+/PLZF+	mean			tubule-10							1	1	1	2	2	1	5	5	1							5	5	1	5	5	1				1	1	1	6	6	1	4	4	1	1	1
Control 1-1	0.89537		Srsf10cKO-1-1	0.94375				tubule-11							3	3	1	1	1	1	6	7	0.857143							2	3	0.666667	7	7	1				2	2	1	3	3	1	2	2	1	4	4
Control 1-2	0.935305		Srsf10cKO-1-2	1				tubule-12							1	1	1	4	4	1	7	7	1							6	6	1	4	4	1				3	3	1	2	2	1	7	7	1	5	5
Control 1-3	0.904398		Srsf10cKO-1-3	1				tubule-13										3	5	0.6	2	2	1							9	9	1	4	5	0.8				4	4	1	5	5	1	6	6	1	7	7
Control 1-4	0.874921		Srsf10cKO-1-4	0.944444	0.972049			tubule-14										5	5	1										6	6	1	5	5	1				1	1	1	4	4	1	2	2	1	5	5
Control 1-5	0.980464	0.918092	Srsf10cKO-2-1	0.928571				tubule-15										4	4	1										3	3	1	4	4	1				2	2	1	1	1	1	6	7	0.857143	1	1
Control 2-1	1		Srsf10cKO-2-2	0.952381																										4	4	1							2	2	1	1	1	1	2	2	1	2	2
Control 2-2	0.975		Srsf10cKO-2-3	0.985243																																			3	3	1	13	13	1	2	3	0.666667
Control 2-3	0.960417		Srsf10cKO-2-4	1				mean			0.89537			0.935305			0.904398			0.874921			0.980464			1			0.975			0.960417			0.973333			0.953704			0.985294			1			0.960224
Control 2-4	0.973333		Srsf10cKO-2-5	1	0.973239
Control 2-5	0.953704	0.972491	Srsf10cKO-3-1	0.953125					41	45	5.37222	53	58	8.41775	48	57	10.8528	50	58	13.1238	69	71	12.746	17	17	7	46	47	7.8	69	72	15.3667	65	67	14.6	61	64	8.58333	53	54	16.75	55	55	17	55	58	16.3238	66	68
Control 3-1	0.985294		Srsf10cKO-3-2	0.947917
Control 3-2	1		Srsf10cKO-3-3	0.94881					Srsf10cKO-1-1			Srsf10cKO-1-2			Srsf10cKO-1-3			Srsf10cKO-1-4			Srsf10cKO-2-1			Srsf10cKO-2-2			Srsf10cKO-2-3			Srsf10cKO-2-4			Srsf10cKO-2-5			Srsf10cKO-3-1			Srsf10cKO-3-2			Srsf10cKO-3-3			Srsf10cKO-3-4
Control 3-3	0.960224		Srsf10cKO-3-4	0.979167	0.957254				PLZF+KI67+	PLZF+	PLZF+KI67+/PLZF+	PLZF+KI67+	PLZF+	PLZF+KI67+/PLZF+	PLZF+KI67+	PLZF+	PLZF+KI67+/PLZF+	PLZF+KI67+	PLZF+	PLZF+KI67+/PLZF+	PLZF+KI67+	PLZF+	PLZF+KI67+/PLZF+	PLZF+KI67+	PLZF+	PLZF+KI67+/PLZF+	PLZF+KI67+	PLZF+	PLZF+KI67+/PLZF+	PLZF+KI67+	PLZF+	PLZF+KI67+/PLZF+	PLZF+KI67+	PLZF+	PLZF+KI67+/PLZF+	PLZF+KI67+	PLZF+	PLZF+KI67+/PLZF+	PLZF+KI67+	PLZF+	PLZF+KI67+/PLZF+	PLZF+KI67+	PLZF+	PLZF+KI67+/PLZF+	PLZF+KI67+	PLZF+	PLZF+KI67+/PLZF+
Control 3-4	0.977083							tubule-1	1	1	1	4	4	1	4	4	1	3	3	1	5	5	1	4	4	1	7	7	1	3	3	1	3	3	1	2	2	1	1	1	1	3	3	1	5	5	1
Control 3-5	0.970588	0.978638						tubule-2	3	4	0.75	2	2	1	3	3	1	2	3	0.666667	5	5	1	5	5	1	1	1	1	6	6	1	4	4	1	3	3	1	1	1	1	7	7	1	2	3	0.666667
								tubule-3	1	1	1	4	4	1	5	5	1	7	7	1	10	10	1	5	6	0.833333	4	4	1	3	3	1	4	4	1	3	3	1	2	2	1	4	4	1	1	1	1
								tubule-4	3	3	1	2	2	1	3	3	1	7	7	1	4	4	1	3	3	1	7	8	0.875	6	6	1	8	8	1	2	2	1	4	4	1	4	4	1	2	2	1
								tubule-5	8	8	1	5	5	1	2	2	1	5	5	1	3	3	1	7	7	1	13	13	1	7	7	1	3	3	1	2	2	1	2	2	1	1	1	1	2	2	1
								tubule-6	3	3	1	4	4	1	4	4	1	2	2	1	4	4	1	2	2	1	5	5	1	3	3	1	2	2	1	4	4	1	5	5	1	1	1	1	1	1	1
								tubule-7	3	3	1	3	3	1	5	5	1				6	6	1	6	6	1	2	2	1	4	4	1	5	5	1	1	2	0.5	2	2	1	4	4	1	3	3	1
								tubule-8	4	5	0.8	8	8	1	4	4	1				2	2	1	5	5	1	8	9	0.888889	3	3	1	5	5	1	1	1	1	1	2	0.5	3	3	1	2	2	1
								tubule-9				5	5	1							10	10	1	1	1	1	2	2	1	3	3	1	3	3	1	1	1	1	2	2	1	4	4	1	3	3	1
								tubule-10													1	3	0.333333	4	4	1	3	3	1	2	2	1	2	2	1	5	5	1	2	2	1	4	5	0.8	2	2	1
								tubule-11													3	3	1	5	6	0.833333	4	4	1	7	7	1	3	3	1	4	4	1	1	1	1	3	3	1	2	2	1
								tubule-12													2	3	0.666667	3	3	1	4	4	1	7	7	1	4	4	1	2	2	1	2	2	1	4	4	1	3	3	1
								tubule-13													4	4	1	2	3	0.666667	4	4	1	3	3	1	3	3	1	3	3	1	2	3	0.666667	5	7	0.714286	2	2	1
								tubule-14													3	3	1	3	3	1	3	3	1	1	1	1	2	2	1	1	1	1	5	5	1	2	3	0.666667	3	3	1
								tubule-15																			5	5	1	4	4	1	4	4	1	3	4	0.75	5	5	1	1	1	1	1	1	1
								tubule-16																			2	2	1	3	3	1				2	2	1	3	3	1	4	4	1	7	7	1
								tubule-17
								tubule-18
								mean			0.94375			1			1			0.944444			0.928571			0.952381			0.985243			1			1			0.953125			0.947917			0.94881			0.979167
									26	28	7.55	37	37	9	30	30	8	26	27	5.66667	62	65	13	55	58	13.3333	74	76	15.7639	65	65	16	55	55	15	39	41	15.25	40	42	15.1667	54	58	15.181	41	42	15.6667
[truncated: 4 more columns]

## Sheet: Figure 6G
Figure 6G-source data: Quantification of the ratio of EdU+PLZF+ cells in PLZF+ cells in control and Srsf10-cKO testes at P6.
	EdU+KI67+/PLZF+					The detailed information of Figure 6G
	Control	Srsf10-cKO						EdU+ PLZF+cells	PLZF+cells	EDU+PLZF+/PLZF+	mean		EdU+ PLZF+cells	PLZF+cells	EDU+PLZF+/PLZF+	mean
	0.336873	0.182773					Control 1-1	63	166	0.379518		Srsf10cKO-1-1	11	77	0.142857
	0.3508	0.326315					Control 1-2	100	281	0.355872		Srsf10cKO-1-2	15	70	0.214286
	0.446576	0.365829					Control 1-3	60	218	0.275229	0.336873	Srsf10cKO-1-3	13	68	0.191176	0.182773
	0.398567	0.304474
	0.43222	0.325226					Control 2-1	64	178	0.359551		Srsf10cKO-2-1	18	61	0.295082
	0.497973	0.39796					Control 2-2	83	214	0.38785		Srsf10cKO-2-2	25	63	0.396825
	0.444688	0.317517					Control 2-3	61	200	0.305	0.3508	Srsf10cKO-2-3	31	108	0.287037	0.326315
		0.369817
mean	0.415386	0.323739					Control 3-1	69	143	0.482517		Srsf10cKO-3-1	20	47	0.425532
T-test	0.0123096						Control 3-2	69	157	0.43949		Srsf10cKO-3-2	26	73	0.356164
							Control 3-3	66	158	0.417722	0.446576	Srsf10cKO-3-3	18	57	0.315789	0.365829
							Control 4-1	51	125	0.408		Srsf10cKO-4-1	33	105	0.314286
							Control 4-2	36	92	0.391304		Srsf10cKO-4-2	32	95	0.336842
							Control 4-3	44	111	0.396396	0.398567	Srsf10cKO-4-3	16	61	0.262295	0.304474
							Control 5-1	120	266	0.451128		Srsf10cKO-5-1	33	100	0.33
							Control 5-2	125	297	0.420875		Srsf10cKO-5-2	38	123	0.308943
							Control 5-3	124	292	0.424658	0.43222	Srsf10cKO-5-3	33	98	0.336735	0.325226
							Control 6-1	113	221	0.511312		Srsf10cKO-6-1	58	114	0.508772
							Control 6-2	117	254	0.46063		Srsf10cKO-6-2	37	117	0.316239
							Control 6-3	95	182	0.521978	0.497973	Srsf10cKO-6-3	70	179	0.391061
												Srsf10cKO-6-4	50	141	0.35461
							Control 7-1	119	274	0.434307		Srsf10cKO-6-5	57	136	0.419118	0.39796
							Control 7-2	119	259	0.459459
							Control 7-3	118	268	0.440299	0.444688	Srsf10cKO-7-1	41	121	0.338843
												Srsf10cKO-7-2	25	75	0.333333
												Srsf10cKO-7-3	30	107	0.280374	0.317517
												Srsf10cKO-8-1	63	164	0.384146
												Srsf10cKO-8-2	42	123	0.341463
												Srsf10cKO-8-3	41	121	0.338843
												Srsf10cKO-8-4	56	135	0.414815	0.369817

## Sheet: Figure 6I
Figure 6I-source data: Quantification of the ratio of CAP3+PLZF+ cells in PLZF+ cells in control and Srsf10-cKO testes at P8.
	CAP3+PLZF+/PLZF+						The detailed information of Figure 6I
	Control	Srsf10-cKO													SUM	CAP3+PLZF+/PLZF+	%
	0.134529	1.8664					Control-1	CAP3+PLZF+	0	1	2				3
	0.369914	3.0541						PLZF+	2230						2230	0.00134529	0.134529
	0.342633	0.758725					Control-2	CAP3+PLZF+	3	4	1	1			9
	0.350672	1.1335						PLZF+	2433						2433	0.00369914	0.369914
	0.877193	1.5873					Control-3	CAP3+PLZF+	1	6	0	0			7
	0.395257	1.21581						PLZF+	2043						2043	0.00342633	0.342633
mean	0.4117	1.60264					Control-4	CAP3+PLZF+	1	2	2	1			6		0
T-test	0.0138075							PLZF+	1711						1711	0.00350672	0.350672
							Control-5	CAP3+PLZF+	3	1	0	4			8		0
								PLZF+	107	166	183	456			912	0.00877193	0.877193
							Control-6	CAP3+PLZF+	1	0	1	2			4		0
								PLZF+	169	144	193	506			1012	0.00395257	0.395257
															SUM
							Srsf10cKO-1	CAP3+PLZF+	2	5	4	3	2	3	19
								PLZF+	1018						1018	0.018664	1.8664
							Srsf10cKO-2	CAP3+PLZF+	3	13	5	9	5	0	35
								PLZF+	1146						1146	0.030541	3.0541
							Srsf10cKO-3	CAP3+PLZF+	2	3	0	0			5
								PLZF+	659						659	0.00758725	0.758725
							Srsf10cKO-4	CAP3+PLZF+	2	2	0	3	2		9		0
								PLZF+	794						794	0.011335	1.1335
							Srsf10cKO-5	CAP3+PLZF+	2	1	3	6			12		0
								PLZF+	131	128	119	378			756	0.015873	1.5873
							Srsf10cKO-6	CAP3+PLZF+	1	2	1	0	4		8		0
								PLZF+	77	75	76	101	329		658	0.0121581	1.21581
