# Supplementary material for: SRSF10 is essential for progenitor spermatogonia expansion by regulating alternative splicing
Source: eLife journal article supplement (doi:10.7554/elife.78211), 2022-10-24
Supplement: fig6-figsupp2-data1 [file Figure 6-figure supplement 2-source data 1.xlsx]

## Sheet: Fig6-S2AB-1
USPG2 down-regulated gene								GO
	p_val	avg_log2FC	pct.1	pct.2	p_val_adj			Category	Term	Count	%	PValue	Genes	List Total	Pop Hits	Pop Total	Fold Enrichment	Bonferroni	Benjamini	FDR
Malat1	1.22568e-12	1.4867	0.974	0.806	2.85705e-08			GOTERM_BP_DIRECT	GO:0006351~transcription, DNA-templated	103	20.396	6.13435e-14	TCERG1, JMJD1C, ARID4B, TTF1, RRP8, CCAR1, PNN, TRIM28, SALL4, SCMH1, TRIM24, SOX4, GTF2I, KDM2B, DAPK3, POU3F1, FOXP1, ZFP292, EWSR1, KAT6A, TXNIP, KMT2A, KMT2C, CTR9, KMT2B, MYCBP2, BAZ2A, HTATSF1, MIER1, SUDS3, BPTF, ZSCAN18, JUN, CREBBP, ZFHX3, POU2F1, JUND, ZFP638, IRF2BP2, PBX2, NR1D2, NR2F6, SMARCA4, MED13L, SON, GON4L, CNOT3, TADA3, TCF3, BRWD1, PHF3, KDM5B, AHCTF1, CITED2, TCF25, PHF20, …	459	1885	18082	2.15258	1.32491e-10	1.32379e-10	1.31091e-10
Srsf10	1.54675e-12	0.885202	0.91	0.484	3.60548e-08			GOTERM_BP_DIRECT	GO:0016569~covalent chromatin modification	33	6.53465	2.61246e-13	KDM5B, USP16, KMT2A, PHF20, KMT2C, CHD8, CHD7, KMT2B, CHD6, JMJD1C, EHMT1, CHD4, BAZ2A, MYSM1, CHD1, RRP8, TRIM28, TLK2, EP400, SUDS3, JARID2, BRD4, BRD3, KDM2B, DAPK3, ATRX, ASH1L, SMARCA4, ASXL1, KANSL1, KAT6A, WAC, OGT	459	266	18082	4.88727	5.63746e-10	2.81885e-10	2.79142e-10
Chd4	5.63805e-11	0.952469	0.949	0.694	1.31423e-06			GOTERM_BP_DIRECT	GO:0006355~regulation of transcription, DNA-templated	106	20.9901	4.55608e-10	TCERG1, ZFP846, JMJD1C, ARID4B, TTF1, RRP8, CCAR1, PNN, TRIM28, SALL4, SCMH1, TRIM24, SOX4, GTF2I, KDM2B, DAPK3, POU3F1, FOXP1, ZFP292, EWSR1, KAT6A, TXNIP, KMT2A, KMT2C, CTR9, KMT2B, MYCBP2, BAZ2A, HTATSF1, SBNO1, MIER1, SUDS3, BPTF, JUN, CREBBP, ZFHX3, POU2F1, JUND, ZFP638, ZBTB16, IRF2BP2, PBX2, NR1D2, NR2F6, SMARCA4, MED13L, LIN28A, SON, GON4L, CNOT3, TADA3, TCF3, BRWD1, NFE2L1, KDM5B, AHCTF1…	459	2279	18082	1.83229	9.83201e-07	2.87858e-07	2.85057e-07
Nipbl	5.49026e-10	0.792711	0.722	0.258	1.27978e-05			GOTERM_BP_DIRECT	GO:0008380~RNA splicing	27	5.34653	5.33565e-10	RBM25, FMR1, USP39, PRPF19, PNN, SCAF8, PPP4R2, TRA2A, SNRNP35, HNRNPA1, SRSF10, SRRM2, RBM39, PRPF38B, ZFP638, SUPT6, PRPF40A, PRPF4B, SRPK1, SRRM1, SFPQ, PRPF39, SON, DDX39B, SNRNP48, CDK12, SNRNP200	459	241	18082	4.41347	1.15143e-06	2.87858e-07	2.85057e-07
Rrbp1	1.04799e-08	0.765932	0.833	0.484	0.000244286			GOTERM_BP_DIRECT	GO:0006397~mRNA processing	30	5.94059	3.75876e-09	RBM25, FMR1, USP39, PRPF19, PNN, SCAF8, PPP4R2, TRA2A, SNRNP35, HNRNPA1, SRSF10, SRRM2, RBM39, PRPF38B, CPSF3, SUPT6, PRPF40A, PRPF4B, SRPK1, SRRM1, HNRNPL, SFPQ, PRPF39, SON, DDX39B, SUPT5, TUT1, SNRNP48, CDK12, SNRNP200	459	322	18082	3.67028	8.11136e-06	1.62228e-06	1.60649e-06
Eif5b	1.30029e-08	0.609877	0.987	0.806	0.000303097			GOTERM_BP_DIRECT	GO:0000122~negative regulation of transcription from RNA polymerase II promoter	46	9.10891	3.43912e-08	CDKN1C, TCERG1, ZFP148, CITED2, TCF25, CUL3, CHD8, CTR9, EHMT1, CHD4, CDC73, NIPBL, TRIM28, SALL4, TPR, HIST1H1E, SUDS3, JARID2, BPTF, SPEN, ZFHX3, JUN, CREBBP, JUND, KDM2B, ZBTB16, MBD2, IRF2BP2, DICER1, GATAD2B, NR2F6, SMARCA4, FOXP1, GATAD2A, SKI, ASXL1, REST, SFPQ, SUPT5, PHF14, TXNIP, CTNNB1, CALR, TCF3, EZR, PPID	459	729	18082	2.48579	7.42135e-05	1.23694e-05	1.2249e-05
mt-Co1	2.12517e-08	0.701789	0.974	0.935	0.000495377			GOTERM_BP_DIRECT	GO:0006974~cellular response to DNA damage stimulus	32	6.33663	1.11916e-07	BLM, USP16, RIF1, FMR1, CEP164, SMC5, PRPF19, NIPBL, CHAF1A, BOD1L, UBR5, TLK2, RBBP8, USP7, INTS3, ATRX, HUWE1, REV1, WRNIP1, CHD1L, SSRP1, SMC1A, SFPQ, RAD50, APC, MSH2, DDX39B, JMY, TAOK2, WAC, TRIP12, SUPT16	459	420	18082	3.00147	0.000241485	3.45021e-05	3.41663e-05
Rcc2	3.14085e-08	0.55396	0.979	0.823	0.000732133			GOTERM_BP_DIRECT	GO:0007049~cell cycle	39	7.72277	3.96067e-07	CDKN1C, USP37, AHCTF1, USP16, RIF1, SYCP1, ARL3, CEP164, CCNF, SMC5, USP39, ING1, CDC73, CCAR1, NIPBL, CHAF1A, MIS18BP1, RB1CC1, POGZ, CNTRL, TPR, TLK2, RBBP8, LZTS2, CASP8AP2, PDCD6IP, RCC2, SMC1A, NDC80, ASPM, RAD50, SON, MSH2, CENPC1, MCM3, TXNIP, NCAPD3, SYCP3, TAF1	459	614	18082	2.50225	0.000854347	0.000106839	0.000105799
Tnrc6c	4.43912e-08	0.708851	0.872	0.565	0.00103476			GOTERM_BP_DIRECT	GO:0006457~protein folding	16	3.16832	8.69507e-07	PDIA3, RANBP2, TRAP1, HSP90AA1, PPIL2, PDIA6, HSP90B1, PDIA4, DNAJA1, CANX, P4HB, CALR, PPIB, PPIL4, PPID, NKTR	459	128	18082	4.92429	0.00187464	0.000208489	0.00020646
Auts2	4.94973e-08	0.760399	0.799	0.452	0.00115378			GOTERM_BP_DIRECT	GO:0006281~DNA repair	24	4.75248	6.91102e-06	USP7, BLM, INTS3, CEP164, ATRX, HUWE1, REV1, SMC5, WRNIP1, SSRP1, CHD1L, PRPF19, SMC1A, RAD50, SFPQ, CHAF1A, BOD1L, MSH2, TRIM28, UBR5, JMY, RBBP8, TRIP12, SUPT16	459	318	18082	2.97316	0.0148034	0.0014914	0.00147688
Chd6	8.87087e-08	0.613226	0.697	0.274	0.0020678			GOTERM_BP_DIRECT	GO:0019827~stem cell population maintenance	11	2.17822	1.14206e-05	NIPBL, LIN28A, APC, RIF1, SALL4, CTR9, CTNNB1, DICER1, SMC1A, CDC73, SMARCA4	459	71	18082	6.10335	0.0243445	0.00224051	0.0022187
Rps28	1.28502e-07	0.250381	1	1	0.00299537			GOTERM_BP_DIRECT	GO:0080182~histone H3-K4 trimethylation	6	1.18812	3.53652e-05	KMT2A, CTR9, KMT2B, ARID4A, HIST1H1E, OGT	459	16	18082	14.7729	0.0734798	0.00635984	0.00629795
Ankrd31	1.82644e-07	0.489662	0.47	0.113	0.00425744			GOTERM_BP_DIRECT	GO:0045944~positive regulation of transcription from RNA polymerase II promoter	47	9.30693	6.08139e-05	ZFP148, USP16, KMT2A, CITED2, CHD8, CTR9, CHD7, ARID4A, ARID4B, MYSM1, CDC73, PPP3CA, NIPBL, HYAL2, SALL4, SOX4, PELP1, ZFP462, BRD4, NCK1, JUN, CREBBP, JUND, POU2F1, AUTS2, ATRX, PBX2, ASH1L, FOS, DICER1, POU3F1, SMARCA4, FOXP1, SKI, ASXL1, MLLT10, ZFP292, SUPT5, CTNNB1, ITGA6, PHIP, TCF3, SSBP2, SSBP3, OGT, NFE2L1, TAF1	459	995	18082	1.86084	0.122993	0.0100951	0.00999687
Aplp2	1.89154e-07	0.698192	0.765	0.387	0.00440918			GOTERM_BP_DIRECT	GO:0007067~mitotic nuclear division	20	3.9604	8.84183e-05	USP37, AHCTF1, USP16, RCC2, CCNF, CLTC, CEP164, SMC5, SMC1A, NDC80, ASPM, ESPL1, MIS18BP1, CENPC1, TADA3, TPR, RBBP8, SYCP3, NCAPD3, LZTS2	459	277	18082	2.84436	0.173715	0.0136291	0.0134964
Ash1l	2.66899e-07	0.573918	0.641	0.29	0.00622141			GOTERM_BP_DIRECT	GO:0000413~protein peptidyl-prolyl isomerization	6	1.18812	0.000115437	RANBP2, PPIL2, PPIB, PPIL4, PPID, NKTR	459	20	18082	11.8183	0.220519	0.0166075	0.0164459
Rpn1	3.74782e-07	0.562787	0.821	0.452	0.00873617			GOTERM_BP_DIRECT	GO:0034976~response to endoplasmic reticulum stress	10	1.9802	0.000125663	PPP1R15A, PDIA3, HSPA5, TMEM33, DNAJC10, TMBIM6, P4HB, EEF2, PDIA6, PDIA4	459	76	18082	5.18347	0.237535	0.0169488	0.0167839
Son	3.79572e-07	0.57418	0.953	0.71	0.00884782			GOTERM_BP_DIRECT	GO:1990441~negative regulation of transcription from RNA polymerase II promoter in response to endoplasmic reticulum stress	4	0.792079	0.000155431	PPP1R15A, JUN, TMBIM6, NCK1	459	5	18082	31.5155	0.284981	0.0174487	0.0172789
Glg1	3.88588e-07	0.596378	0.705	0.323	0.00905799			GOTERM_BP_DIRECT	GO:0035116~embryonic hindlimb morphogenesis	7	1.38614	0.000158316	ZBTB16, CHD7, GNAS, CTNNB1, DICER1, AFF3, SMARCA4	459	33	18082	8.35637	0.289419	0.0174487	0.0172789
Rock1	4.21089e-07	0.629642	0.846	0.532	0.00981559			GOTERM_BP_DIRECT	GO:0045893~positive regulation of transcription, DNA-templated	31	6.13861	0.000165014	CDKN1C, BLM, USP16, KMT2A, CITED2, CHD8, RNF6, ING1, TRIM28, TRIM24, SOX4, BPTF, SPEN, ZFHX3, JUN, CREBBP, ZBTB16, NR1D2, FOS, POU3F1, SMARCA4, FOXP1, REST, KAT6A, TADA3, WAC, CTNNB1, PHIP, NAA15, TCF3, SSBP3	459	576	18082	2.12018	0.299618	0.0174487	0.0172789
Pcm1	4.76155e-07	0.66153	0.846	0.532	0.0110992			GOTERM_BP_DIRECT	GO:0007030~Golgi organization	10	1.9802	0.000169798	ARFGEF1, LMAN1, CUL7, TMED9, TMED10, LMAN2, SURF4, CLTC, DYM, TRIP11	459	79	18082	4.98662	0.306812	0.0174487	0.0172789
Zbtb16	6.6965e-07	0.543381	0.756	0.387	0.0156095			GOTERM_BP_DIRECT	GO:0006338~chromatin remodeling	10	1.9802	0.000169798	CHD7, ATRX, SCMH1, BAZ2A, CHD1L, TTF1, CHD1, MYSM1, SMARCA4, BPTF	459	79	18082	4.98662	0.306812	0.0174487	0.0172789
2610507B11Rik	6.91396e-07	0.458005	0.697	0.323	0.0161164			GOTERM_BP_DIRECT	GO:0006306~DNA methylation	6	1.18812	0.000235307	KMT2A, GNAS, EHMT1, BAZ2A, GATAD2B, GATAD2A	459	23	18082	10.2768	0.398213	0.0221844	0.0219685
Jund	7.31259e-07	0.472143	0.974	0.629	0.0170457			GOTERM_BP_DIRECT	GO:0051301~cell division	23	4.55446	0.000236442	USP37, AHCTF1, USP16, PDCD6IP, SYCP1, RCC2, ARL3, CCNF, CEP164, SMC5, USP39, SMC1A, NDC80, ASPM, MIS18BP1, CNTRL, CENPC1, POGZ, TPR, RBBP8, SYCP3, NCAPD3, LZTS2	459	374	18082	2.42265	0.399686	0.0221844	0.0219685
Prpf4b	7.69675e-07	0.465942	0.782	0.371	0.0179411			GOTERM_BP_DIRECT	GO:0000212~meiotic spindle organization	4	0.792079	0.000523728	ESPL1, ATRX, MYH9, DICER1	459	7	18082	22.511	0.677129	0.0470919	0.0466336
Phf3	8.44715e-07	0.588887	0.731	0.435	0.0196903			GOTERM_BP_DIRECT	GO:0032968~positive regulation of transcription elongation from RNA polymerase II promoter	5	0.990099	0.00116375	CTR9, SUPT6, CDC73, SUPT16, BRD4	459	19	18082	10.3669	0.918962	0.100455	0.0994774
Gon4l	9.61154e-07	0.574836	0.718	0.387	0.0224045			GOTERM_BP_DIRECT	GO:0051028~mRNA transport	9	1.78218	0.00174432	RANBP2, POM121, AHCTF1, DDX39B, FMR1, TPR, IGF2BP1, SUPT6, HNRNPA1	459	88	18082	4.02897	0.976891	0.13565	0.13433
Tpr	1.23959e-06	0.599874	0.962	0.758	0.0288948			GOTERM_BP_DIRECT	GO:0001822~kidney development	11	2.17822	0.00175445	CDKN1C, TMED10, APC, CITED2, KIF3A, TIPARP, ARL3, ODC1, CTNNB1, LZTS2, PCNT	459	130	18082	3.33337	0.977391	0.13565	0.13433
Trip11	1.64338e-06	0.464801	0.423	0.081	0.0383072			GOTERM_BP_DIRECT	GO:0045892~negative regulation of transcription, DNA-templated	28	5.54455	0.00176006	KDM5B, ZFP148, CITED2, CHD8, ARID4A, EHMT1, NIPBL, BCLAF1, TRIM28, SCMH1, TRIM24, SUDS3, JARID2, SPEN, JUN, POU2F1, ZBTB16, NR1D2, SMARCA4, FOXP1, GATAD2A, REST, SFPQ, GON4L, KAT6A, CTNNB1, CALR, MPHOSPH8	459	579	18082	1.90508	0.977664	0.13565	0.13433
Nomo1	1.71275e-06	0.495771	0.509	0.177	0.0399242			GOTERM_BP_DIRECT	GO:0031532~actin cytoskeleton reorganization	7	1.38614	0.00194094	MKLN1, SIPA1L1, MYH9, CDC42BPB, ATP2C1, EZR, SPTAN1	459	52	18082	5.30308	0.984893	0.144432	0.143027
Cabin1	1.79193e-06	0.517433	0.726	0.387	0.0417699			GOTERM_BP_DIRECT	GO:0000398~mRNA splicing, via spliceosome	10	1.9802	0.00218051	SPEN, DDX39B, TRA2A, PRPF40A, PRPF19, SNRNP35, HTATSF1, SNRNP200, SRSF10, SRRM1	459	112	18082	3.51735	0.991001	0.156851	0.155325
Mphosph8	2.33002e-06	0.530555	0.953	0.71	0.0543127			GOTERM_BP_DIRECT	GO:0000042~protein targeting to Golgi	4	0.792079	0.00228901	GOLGA4, TRIP11, GCC2, RAB6A	459	11	18082	14.3252	0.992884	0.158447	0.156905
Lamp1	2.34608e-06	0.537873	0.932	0.613	0.0546871			GOTERM_BP_DIRECT	GO:0043065~positive regulation of apoptotic process	19	3.76238	0.00234954	USP7, JUN, ZBTB16, DAPK3, UACA, PTPRF, CCAR1, DNAJA1, REST, BCLAF1, SLK, APC, JMY, CTNNB1, TXNIP, ITGA6, SUDS3, SOX4, PPID	459	335	18082	2.23431	0.993757	0.158447	0.156905
Slc25a4	2.58248e-06	0.465323	0.722	0.371	0.0601975			GOTERM_BP_DIRECT	GO:0051276~chromosome organization	6	1.18812	0.00256986	BLM, RAD50, SMCHD1, SFPQ, APC, SMC1A	459	38	18082	6.22016	0.996124	0.168053	0.166418
Epb41	2.62781e-06	0.417927	0.487	0.145	0.0612543			GOTERM_BP_DIRECT	GO:0001889~liver development	9	1.78218	0.00283081	UPF2, JUN, CADM1, DDX39B, CITED2, RB1CC1, JARID2, SEC63, SMARCA4	459	95	18082	3.73209	0.997796	0.175346	0.17364
Phactr4	2.8241e-06	0.448213	0.526	0.177	0.0658299			GOTERM_BP_DIRECT	GO:0060348~bone development	7	1.38614	0.00284389	ASXL1, CADM1, ANKRD11, GNAS, DYM, TRIP11, PPIB	459	56	18082	4.92429	0.997858	0.175346	0.17364
AC149090.1	3.01638e-06	0.461432	0.466	0.129	0.0703118			GOTERM_BP_DIRECT	GO:0045727~positive regulation of translation	7	1.38614	0.00311191	HNRNPL, LIN28A, DDX39B, FMR1, UPF3B, EEF2, SOX4	459	57	18082	4.8379	0.998801	0.186542	0.184726
Ppid	3.21168e-06	0.490986	0.855	0.629	0.0748643			GOTERM_BP_DIRECT	GO:0043044~ATP-dependent chromatin remodeling	5	0.990099	0.00336875	CHD8, MBD2, CHD4, GATAD2B, SMARCA4	459	25	18082	7.87887	0.999312	0.19648	0.194568
Topaz1	3.22795e-06	0.432665	0.692	0.323	0.0752435			GOTERM_BP_DIRECT	GO:0010638~positive regulation of organelle organization	3	0.594059	0.00371322	LMAN1, TMED9, SURF4	459	4	18082	29.5458	0.999674	0.201106	0.199149
Akap9	3.31865e-06	0.633377	0.671	0.387	0.0773577			GOTERM_BP_DIRECT	GO:0035522~monoubiquitinated histone H2A deubiquitination	3	0.594059	0.00371322	ASXL1, USP16, MYSM1	459	4	18082	29.5458	0.999674	0.201106	0.199149
Pnn	4.2518e-06	0.499472	0.923	0.661	0.0991094			GOTERM_BP_DIRECT	GO:0007283~spermatogenesis	21	4.15842	0.00380877	BTG1, GGNBP2, CADM1, KDM2B, SYCP1, ATRX, ARID4A, ARID4B, UBR2, MEA1, 4932438A13RIK, TDRD1, DNAJA1, ASPM, LAMP1, SCMH1, AKAP9, TLK2, SYCP3, CALR, TCFL5	459	407	18082	2.03263	0.999735	0.201106	0.199149
mt-Co3	4.30803e-06	0.472058	0.987	0.952	0.10042			GOTERM_BP_DIRECT	GO:0034453~microtubule anchoring	4	0.792079	0.00382083	PCM1, CEP350, DAG1, GCC2	459	13	18082	12.1213	0.999742	0.201106	0.199149
Yipf3	4.32091e-06	0.530217	0.56	0.29	0.10072			GOTERM_BP_DIRECT	GO:0001701~in utero embryonic development	17	3.36634	0.00414263	CITED2, CUL3, CHD8, ANKRD11, CHD7, TPM1, SMARCA4, FOXP1, TTN, GATAD2A, MSH2, TRIM28, KIF3A, SALL4, CTNNB1, MYH9, PCNT	459	299	18082	2.23981	0.999871	0.212852	0.210781
Gm42418	4.70421e-06	0.374461	1	1	0.109655			GOTERM_BP_DIRECT	GO:0043984~histone H4-K16 acetylation	4	0.792079	0.00477225	KMT2A, KANSL1, PHF20, OGT	459	14	18082	11.2555	0.999967	0.235447	0.233156
Arl3	4.73149e-06	0.452778	0.509	0.194	0.110291			GOTERM_BP_DIRECT	GO:0006364~rRNA processing	10	1.9802	0.00480059	NOP14, TBL3, RPS28, DDX27, LAS1L, CHD7, UTP20, MDN1, RRP8, FTSJ3	459	126	18082	3.12653	0.999969	0.235447	0.233156
Prpf40a	4.86814e-06	0.527403	0.803	0.435	0.113476			GOTERM_BP_DIRECT	GO:0006890~retrograde vesicle-mediated transport, Golgi to ER	5	0.990099	0.00584098	TMED10, LMAN2, RAB6A, ERGIC2, ATP9A	459	29	18082	6.79213	0.999997	0.280107	0.277382
Casp8ap2	5.55045e-06	0.480205	0.718	0.387	0.129381			GOTERM_BP_DIRECT	GO:0006357~regulation of transcription from RNA polymerase II promoter	20	3.9604	0.00627993	BRD3, USP16, JUND, CITED2, CUL3, SUPT6, FOS, POU3F1, CDC73, MED13L, REST, SUPT5, JMY, TADA3, GNAS, CTNNB1, HIST1H1E, PHIP, TCF3, BRWD1	459	397	18082	1.9846	0.999999	0.294611	0.291744
Tbl3	5.59062e-06	0.416876	0.491	0.177	0.130317			GOTERM_BP_DIRECT	GO:0051571~positive regulation of histone H3-K4 methylation	4	0.792079	0.00707134	KMT2A, AUTS2, CTR9, OGT	459	16	18082	9.84858	1	0.32468	0.32152
Rock2	5.65214e-06	0.559854	0.718	0.371	0.131751			GOTERM_BP_DIRECT	GO:0051726~regulation of cell cycle	9	1.78218	0.00765057	SFPQ, JUN, USP16, SON, JUND, APC, CCNF, DICER1, PHACTR4	459	112	18082	3.16562	1	0.343957	0.34061
Sbno1	6.14921e-06	0.519935	0.966	0.742	0.143338			GOTERM_BP_DIRECT	GO:0043388~positive regulation of DNA binding	5	0.990099	0.00833254	SKI, TRIM28, EDF1, SMARCA4, BRD4	459	32	18082	6.15536	1	0.358755	0.355264
Prpf38b	6.27943e-06	0.525713	0.739	0.403	0.146374			GOTERM_BP_DIRECT	GO:0061077~chaperone-mediated protein folding	5	0.990099	0.00833254	CANX, CALR, PPIB, PPID, PDIA4	459	32	18082	6.15536	1	0.358755	0.355264
Tada3	6.4704e-06	0.35157	0.427	0.113	0.150825			GOTERM_BP_DIRECT	GO:0061038~uterus morphogenesis	3	0.594059	0.00897512	KDM5B, NIPBL, ASH1L	459	6	18082	19.6972	1	0.358755	0.355264
Cplane1	6.90394e-06	0.471472	0.393	0.097	0.160931			GOTERM_BP_DIRECT	GO:0035509~negative regulation of myosin-light-chain-phosphatase activity	3	0.594059	0.00897512	ROCK1, MPRIP, ROCK2	459	6	18082	19.6972	1	0.358755	0.355264
Rbm25	6.96873e-06	0.479985	0.966	0.726	0.162441			GOTERM_BP_DIRECT	GO:0060964~regulation of gene silencing by miRNA	3	0.594059	0.00897512	TNRC6C, LIN28A, FMR1	459	6	18082	19.6972	1	0.358755	0.355264
Naa35	7.42249e-06	0.556594	0.752	0.403	0.173018			GOTERM_BP_DIRECT	GO:0008360~regulation of cell shape	10	1.9802	0.00898232	MKLN1, EPB41, TPM1, TAOK2, DAPK3, MYH9, PRPF40A, PHIP, BRWD1, EZR	459	139	18082	2.83412	1	0.358755	0.355264
Mycbp2	7.42316e-06	0.534705	0.774	0.419	0.173034			GOTERM_BP_DIRECT	GO:0017148~negative regulation of translation	7	1.38614	0.00914344	LIN28A, FMR1, CNOT3, DAPK3, IREB2, IGF2BP1, CALR	459	71	18082	3.88395	1	0.358755	0.355264
Riok1	7.45457e-06	0.400858	0.547	0.226	0.173766			GOTERM_BP_DIRECT	GO:0051693~actin filament capping	4	0.792079	0.0099252	TPM1, MYH9, SPTAN1, SPTBN1	459	18	18082	8.7543	1	0.382475	0.378753
Kmt2b	7.62292e-06	0.448424	0.551	0.258	0.17769			GOTERM_BP_DIRECT	GO:0031047~gene silencing by RNA	6	1.18812	0.0107906	TNRC6C, TDRD1, LIN28A, FMR1, CNOT3, DICER1	459	53	18082	4.45974	1	0.40853	0.404554
Srrm2	7.88216e-06	0.484012	0.932	0.629	0.183733			GOTERM_BP_DIRECT	GO:0002244~hematopoietic progenitor cell differentiation	8	1.58416	0.0122564	REST, PPP4R2, CITED2, HYAL2, RRS1, PRRC2C, EEF2, SSBP3	459	98	18082	3.21586	1	0.444392	0.440068
Ktn1	8.03845e-06	0.481555	0.701	0.355	0.187376			GOTERM_BP_DIRECT	GO:0001711~endodermal cell fate commitment	3	0.594059	0.0123557	CTR9, CTNNB1, CDC73	459	7	18082	16.8833	1	0.444392	0.440068
Sec63	8.39101e-06	0.459396	0.722	0.371	0.195594			GOTERM_BP_DIRECT	GO:2000144~positive regulation of DNA-templated transcription, initiation	3	0.594059	0.0123557	BCLAF1, JUN, CTNNB1	459	7	18082	16.8833	1	0.444392	0.440068
Rad50	8.44515e-06	0.505787	0.825	0.532	0.196857			GOTERM_BP_DIRECT	GO:0030334~regulation of cell migration	7	1.38614	0.013348	SLK, APC, RCC2, MYSM1, RTN4, NCK1, SMARCA4	459	77	18082	3.5813	1	0.472213	0.467618
Hnrnph3	8.57344e-06	0.522592	0.697	0.355	0.199847			GOTERM_BP_DIRECT	GO:0003281~ventricular septum development	5	0.990099	0.0151926	CITED2, SALL4, CNTRL, TRIP11, SMARCA4	459	38	18082	5.18347	1	0.528799	0.523654
2210016F16Rik	1.01353e-05	0.481763	0.521	0.21	0.236253			GOTERM_BP_DIRECT	GO:0072711~cellular response to hydroxyurea	3	0.594059	0.0162002	BLM, FMR1, ATRX	459	8	18082	14.7729	1	0.538989	0.533744
Naa15	1.01882e-05	0.436567	0.816	0.468	0.237487			GOTERM_BP_DIRECT	GO:0051026~chiasma assembly	3	0.594059	0.0162002	SYCP1, TEX11, SYCP3	459	8	18082	14.7729	1	0.538989	0.533744
Taf1	1.10852e-05	0.502228	0.744	0.452	0.258395			GOTERM_BP_DIRECT	GO:0015031~protein transport	25	4.9505	0.0162346	NAPA, POM121, AHCTF1, TMED10, ARL3, GCC2, RRBP1, AP2A1, LMAN1, LMAN2, TPR, RAB6A, SEC62, SEC63, ARFGEF1, RANBP2, TMED9, PDCD6IP, ACTN4, SCAMP3, KTN1, EHD1, MYH9, IFT46, PPID	459	592	18082	1.66361	1	0.538989	0.533744
Spcs1	1.15729e-05	0.433363	0.504	0.21	0.269765			GOTERM_BP_DIRECT	GO:0006511~ubiquitin-dependent protein catabolic process	10	1.9802	0.016716	USP48, CUL7, USP7, USP37, USP16, CUL3, TTC3, USP34, RNF6, UBR2	459	154	18082	2.55807	1	0.546563	0.541244
Hnrnpa1	1.2339e-05	0.403999	0.991	0.903	0.287622			GOTERM_BP_DIRECT	GO:0042384~cilium assembly	9	1.78218	0.0169847	EHD1, PCM1, KIF3A, CEP295, CEP164, TMEM107, SCLT1, IFT46, PCNT	459	129	18082	2.74844	1	0.547059	0.541736
Ppib	1.26561e-05	0.45675	0.987	0.79	0.295013			GOTERM_BP_DIRECT	GO:0060325~face morphogenesis	5	0.990099	0.018084	SKI, NIPBL, TIPARP, ANKRD11, KAT6A	459	40	18082	4.92429	1	0.573902	0.568317
Otud4	1.27545e-05	0.490178	0.679	0.306	0.297309			GOTERM_BP_DIRECT	GO:0045070~positive regulation of viral genome replication	4	0.792079	0.0196246	LARP1, STAU1, PPID, SRPK1	459	23	18082	6.85119	1	0.604998	0.599111
Spint2	1.34313e-05	0.434378	0.808	0.452	0.313084			GOTERM_BP_DIRECT	GO:0072001~renal system development	4	0.792079	0.0196246	CTNNB1, ITGA6, LZTS2, SEC63	459	23	18082	6.85119	1	0.604998	0.599111
Tmco1	1.41283e-05	0.483158	0.662	0.371	0.32933			GOTERM_BP_DIRECT	GO:0006606~protein import into nucleus	6	1.18812	0.0215546	PPP3CA, POM121, TPR, TXNIP, PHIP, ING1	459	63	18082	3.75184	1	0.645806	0.639522
Pbx2	1.44328e-05	0.413761	0.697	0.355	0.336429			GOTERM_BP_DIRECT	GO:0030866~cortical actin cytoskeleton organization	4	0.792079	0.0220157	ROCK1, ROCK2, EPB41, CALR	459	24	18082	6.56572	1	0.645806	0.639522
Hsp90aa1	1.49282e-05	0.305505	1	0.984	0.347977			GOTERM_BP_DIRECT	GO:0090316~positive regulation of intracellular protein transport	4	0.792079	0.0220157	PCM1, KIF3A, TPR, PCNT	459	24	18082	6.56572	1	0.645806	0.639522
Jarid2	1.49799e-05	0.465256	0.645	0.306	0.349181			GOTERM_BP_DIRECT	GO:0007420~brain development	12	2.37624	0.0221454	CST3, NAPA, ASPM, ZFHX3, NIPBL, CADM1, CHD8, ATP2B1, ACSL3, POU3F1, GAS8, BPTF	459	216	18082	2.18857	1	0.645806	0.639522
Polr1c	1.56265e-05	0.38275	0.932	0.71	0.364253			GOTERM_BP_DIRECT	GO:0006325~chromatin organization	5	0.990099	0.0248348	LAS1L, EHMT1, CHD4, ING1, ZFP462	459	44	18082	4.47663	1	0.713453	0.706511
Chd8	1.68354e-05	0.431991	0.645	0.339	0.392433			GOTERM_BP_DIRECT	GO:0051292~nuclear pore complex assembly	3	0.594059	0.0251796	AHCTF1, TMEM33, RTN4	459	10	18082	11.8183	1	0.713453	0.706511
Phip	1.7766e-05	0.474247	0.585	0.29	0.414126			GOTERM_BP_DIRECT	GO:0042254~ribosome biogenesis	7	1.38614	0.0254749	NOP56, NOP14, RPS28, DDX27, BMS1, RRS1, FTSJ3	459	89	18082	3.09843	1	0.713453	0.706511
Ehd1	1.85259e-05	0.453151	0.684	0.355	0.431839			GOTERM_BP_DIRECT	GO:0006461~protein complex assembly	6	1.18812	0.0257875	ZFP148, KMT2A, APC, EPB41, SSBP3, PPID	459	66	18082	3.5813	1	0.713453	0.706511
Golgb1	1.87219e-05	0.56586	0.744	0.387	0.436407			GOTERM_BP_DIRECT	GO:0035019~somatic stem cell population maintenance	5	0.990099	0.0287085	SKI, APC, KAT6A, ZFP36L2, SOX4	459	46	18082	4.28199	1	0.784214	0.776583
Crebbp	1.89282e-05	0.534123	0.735	0.435	0.441215			GOTERM_BP_DIRECT	GO:0060271~cilium morphogenesis	10	1.9802	0.0294136	EHD1, PCM1, KIF3A, ARL3, CEP295, CEP164, TMEM107, SCLT1, IFT46, PCNT	459	170	18082	2.31731	1	0.793431	0.78571
Srsf11	2.01504e-05	0.514963	0.863	0.597	0.469706			GOTERM_BP_DIRECT	GO:0010390~histone monoubiquitination	3	0.594059	0.0302664	CTR9, WAC, CDC73	459	11	18082	10.7439	1	0.806357	0.798511
Nucb2	2.08716e-05	0.459711	0.53	0.242	0.486517			GOTERM_BP_DIRECT	GO:0043966~histone H3 acetylation	5	0.990099	0.0307722	BRD1, KAT6A, TADA3, TCF3, SMARCA4	459	47	18082	4.19089	1	0.809835	0.801955
Psmd7	2.15174e-05	0.49073	0.97	0.806	0.501572			GOTERM_BP_DIRECT	GO:0031647~regulation of protein stability	6	1.18812	0.0322079	USP7, UBR5, TADA3, TRIM24, IFT46, SOX4	459	70	18082	3.37666	1	0.837406	0.829257
Eif3a	2.2262e-05	0.487384	0.944	0.806	0.518928			GOTERM_BP_DIRECT	GO:0035264~multicellular organism growth	8	1.58416	0.0330621	CDKN1C, RMI1, KMT2C, ANKRD11, ATRX, GNAS, DICER1, PCNT	459	120	18082	2.62629	1	0.84018	0.832004
Fam118b	2.30827e-05	0.378367	0.53	0.194	0.538059			GOTERM_BP_DIRECT	GO:0007131~reciprocal meiotic recombination	4	0.792079	0.0330933	RAD50, MSH2, SYCP1, TEX11	459	28	18082	5.62776	1	0.84018	0.832004
Ddah2	2.41944e-05	0.464241	0.423	0.145	0.563971			GOTERM_BP_DIRECT	GO:0051321~meiotic cell cycle	7	1.38614	0.0336445	TDRD1, RAD50, SYCP1, TEX11, RBBP8, SYCP3, SMC1A	459	95	18082	2.90274	1	0.844241	0.836026
Atrx	2.59513e-05	0.588525	0.671	0.355	0.604926			GOTERM_BP_DIRECT	GO:0006417~regulation of translation	8	1.58416	0.0343606	PPP1R15A, TNRC6C, FMR1, CNOT3, IREB2, IGF2BP1, EIF4G1, NCK1	459	121	18082	2.60458	1	0.852302	0.844008
Ift46	2.87842e-05	0.421304	0.41	0.145	0.670959			GOTERM_BP_DIRECT	GO:0051569~regulation of histone H3-K4 methylation	3	0.594059	0.0357207	KMT2A, KMT2B, CTNNB1	459	12	18082	9.84858	1	0.875969	0.867445
Trip12	3.00349e-05	0.500221	0.902	0.629	0.700114			GOTERM_BP_DIRECT	GO:0001843~neural tube closure	7	1.38614	0.036704	SKI, SPINT1, CITED2, ROCK2, SALL4, SPINT2, PHACTR4	459	97	18082	2.84289	1	0.888576	0.879929
Itm2b	3.29875e-05	0.533188	0.88	0.629	0.768939			GOTERM_BP_DIRECT	GO:0006260~DNA replication	8	1.58416	0.0370583	CCDC88A, BLM, CHAF1A, RMI1, MCM3, WRNIP1, SSRP1, SUPT16	459	123	18082	2.56223	1	0.888576	0.879929
Acsl3	3.34481e-05	0.398223	0.679	0.339	0.779676			GOTERM_BP_DIRECT	GO:0000281~mitotic cytokinesis	4	0.792079	0.0395301	CUL7, SON, APC, SPTBN1	459	30	18082	5.25258	1	0.937428	0.928306
Tmem87b	3.40997e-05	0.389541	0.393	0.129	0.794863			GOTERM_BP_DIRECT	GO:0043923~positive regulation by host of viral transcription	3	0.594059	0.0415207	JUN, CHD1, SMARCA4	459	13	18082	9.091	1	0.963459	0.954083
Afdn	3.47978e-05	0.469686	0.744	0.403	0.811136			GOTERM_BP_DIRECT	GO:0016180~snRNA processing	3	0.594059	0.0415207	INTS3, TUT1, INTS6	459	13	18082	9.091	1	0.963459	0.954083
Herc1	3.4879e-05	0.417463	0.697	0.387	0.813029			GOTERM_BP_DIRECT	GO:0032355~response to estradiol	7	1.38614	0.0433436	CST3, MBD2, RBBP8, TXNIP, CTNNB1, CALR, EEF2	459	101	18082	2.7303	1	0.989603	0.979973
Dhx29	3.70834e-05	0.416033	0.47	0.194	0.864415			GOTERM_BP_DIRECT	GO:0045665~negative regulation of neuron differentiation	6	1.18812	0.0435646	ASPM, REST, TTC3, CALR, PRPF19, RTN4	459	76	18082	3.11008	1	0.989603	0.979973
Ccdc88a	3.76948e-05	0.440788	0.658	0.323	0.878665			GOTERM_BP_DIRECT	GO:0050821~protein stabilization	8	1.58416	0.0444014	USP7, LAMP1, NAA15, CALR, TCF3, PPIB, ATP1B1, SOX4	459	128	18082	2.46215	1	0.998106	0.988393
Kmt2a	3.86983e-05	0.437763	0.662	0.306	0.902057			GOTERM_BP_DIRECT	GO:0016192~vesicle-mediated transport	11	2.17822	0.0453073	ARFGEF1, NAPA, LMAN1, TMED10, CUL3, CLTC, AP2A1, VAMP4, RAB6A, ERGIC2, NCK1	459	213	18082	2.03445	1	1	0.990728
Arid4b	3.91447e-05	0.467241	0.615	0.323	0.912462			GOTERM_BP_DIRECT	GO:0006413~translational initiation	5	0.990099	0.047617	EIF5B, LARP1, DHX29, EIF3A, EIF4G1	459	54	18082	3.64762	1	1	0.990728
Ado	3.92247e-05	0.321069	0.688	0.355	0.914327			GOTERM_BP_DIRECT	GO:2000178~negative regulation of neural precursor cell proliferation	3	0.594059	0.0476454	KDM2B, SPINT1, SPINT2	459	14	18082	8.44164	1	1	0.990728
Lman1	3.98556e-05	0.441209	0.838	0.532	0.929033			GOTERM_BP_DIRECT	GO:0016579~protein deubiquitination	6	1.18812	0.0478206	USP48, USP7, USP37, USP16, USP34, USP39	459	78	18082	3.03033	1	1	0.990728
Apc	4.01862e-05	0.443006	0.632	0.339	0.936741			GOTERM_BP_DIRECT	GO:0010628~positive regulation of gene expression	17	3.36634	0.0482867	PPP1R15A, KDM5B, CREBBP, ROCK2, CITED2, DICER1, POU3F1, PPP3CA, KAT6A, UBR5, TADA3, TRIM24, CTNNB1, TCF3, CALR, EZR, OGT	459	399	18082	1.67846	1	1	0.990728
Tcf25	4.15672e-05	0.514718	0.816	0.516	0.968932			GOTERM_BP_DIRECT	GO:1903334~positive regulation of protein folding	2	0.39604	0.0500179	PDIA3, PDIA4	459	2	18082	39.3943	1	1	0.990728
Lin28a	4.16165e-05	0.412431	0.526	0.226	0.970081			GOTERM_BP_DIRECT	GO:0051878~lateral element assembly	2	0.39604	0.0500179	SYCP1, SYCP3	459	2	18082	39.3943	1	1	0.990728
Scamp3	4.3414e-05	0.352843	0.538	0.274	1			GOTERM_BP_DIRECT	GO:1902416~positive regulation of mRNA binding	2	0.39604	0.0500179	HNRNPL, FMR1	459	2	18082	39.3943	1	1	0.990728
Upf2	4.4163e-05	0.341047	0.667	0.306	1			GOTERM_BP_DIRECT	GO:0009790~embryo development	6	1.18812	0.0500377	APLP2, TPM1, EHMT1, TRIP12, GTF2I, FOXP1	459	79	18082	2.99197	1	1	0.990728
Ewsr1	4.57941e-05	0.452279	0.889	0.565	1			GOTERM_BP_DIRECT	GO:0034613~cellular protein localization	5	0.990099	0.0503669	NIPBL, TMEM33, CTNNB1, PRPF19, GAS8	459	55	18082	3.5813	1	1	0.990728
Msmo1	4.63062e-05	0.514296	0.466	0.21	1			GOTERM_BP_DIRECT	GO:0048538~thymus development	5	0.990099	0.0503669	ASXL1, APC, CITED2, CTNNB1, JARID2	459	55	18082	3.5813	1	1	0.990728
Jmjd1c	4.67987e-05	0.43272	0.684	0.387	1			GOTERM_BP_DIRECT	GO:0000183~chromatin silencing at rDNA	5	0.990099	0.0503669	TAF1D, POLR1C, BAZ2A, TTF1, RRP8	459	55	18082	3.5813	1	1	0.990728
Klhdc4	4.68368e-05	0.336368	0.278	0.032	1			GOTERM_BP_DIRECT	GO:0001501~skeletal system development	7	1.38614	0.0546332	CDKN1C, ZBTB16, CHD7, GNAS, CTNNB1, ASH1L, SOX4	459	107	18082	2.5772	1	1	0.990728
Ccdc71	4.70746e-05	0.362612	0.41	0.145	1			GOTERM_BP_DIRECT	GO:0007050~cell cycle arrest	6	1.18812	0.0546503	CDKN1C, ZFHX3, MSH2, APC, JMY, CALR	459	81	18082	2.9181	1	1	0.990728
Akap1	4.99296e-05	0.403636	0.457	0.194	1			GOTERM_BP_DIRECT	GO:0006950~response to stress	4	0.792079	0.0581472	TRAP1, HSP90AA1, TAOK2, HSP90B1	459	35	18082	4.50221	1	1	0.990728
Mfsd1	5.44932e-05	0.33325	0.483	0.177	1			GOTERM_BP_DIRECT	GO:0043982~histone H4-K8 acetylation	3	0.594059	0.0607896	KANSL1, PHF20, OGT	459	16	18082	7.38644	1	1	0.990728
Rsbn1l	5.59859e-05	0.38916	0.675	0.371	1			GOTERM_BP_DIRECT	GO:0051568~histone H3-K4 methylation	3	0.594059	0.0607896	KMT2A, KMT2B, ASH1L	459	16	18082	7.38644	1	1	0.990728
Spen	5.64619e-05	0.418888	0.513	0.242	1			GOTERM_BP_DIRECT	GO:0022011~myelination in peripheral nervous system	3	0.594059	0.0607896	SKI, DAG1, POU3F1	459	16	18082	7.38644	1	1	0.990728
Tut1	5.65452e-05	0.313849	0.462	0.177	1			GOTERM_BP_DIRECT	GO:0006361~transcription initiation from RNA polymerase I promoter	3	0.594059	0.0607896	TAF1D, POLR1C, TTF1	459	16	18082	7.38644	1	1	0.990728
Casc4	5.8705e-05	0.389642	0.791	0.435	1			GOTERM_BP_DIRECT	GO:0060009~Sertoli cell development	3	0.594059	0.0607896	CST3, AKAP9, ATRX	459	16	18082	7.38644	1	1	0.990728
Sycp1	6.00536e-05	0.479565	0.893	0.613	1			GOTERM_BP_DIRECT	GO:0043981~histone H4-K5 acetylation	3	0.594059	0.0607896	KANSL1, PHF20, OGT	459	16	18082	7.38644	1	1	0.990728
Atp2b1	6.12515e-05	0.393375	0.799	0.435	1			GOTERM_BP_DIRECT	GO:0001833~inner cell mass cell proliferation	3	0.594059	0.0607896	SALL4, PRPF19, BRD4	459	16	18082	7.38644	1	1	0.990728
Ptprf	6.27974e-05	0.409318	0.645	0.355	1			GOTERM_BP_DIRECT	GO:0002089~lens morphogenesis in camera-type eye	3	0.594059	0.0607896	SKI, CITED2, CTNNB1	459	16	18082	7.38644	1	1	0.990728
Chd7	6.35332e-05	0.376021	0.38	0.129	1			GOTERM_BP_DIRECT	GO:0045793~positive regulation of cell size	3	0.594059	0.0607896	HSP90AA1, RB1CC1, OGT	459	16	18082	7.38644	1	1	0.990728
Ppil4	6.72277e-05	0.293189	0.761	0.435	1			GOTERM_BP_DIRECT	GO:0006418~tRNA aminoacylation for protein translation	4	0.792079	0.0622869	LARS2, SARS, IARS2, HARS	459	36	18082	4.37715	1	1	0.990728
Rapgef6	7.05258e-05	0.432962	0.415	0.177	1			GOTERM_BP_DIRECT	GO:0031122~cytoplasmic microtubule organization	4	0.792079	0.0622869	PCM1, SLK, APC, DST	459	36	18082	4.37715	1	1	0.990728
Ankrd17	7.39226e-05	0.446879	0.855	0.565	1			GOTERM_BP_DIRECT	GO:0008285~negative regulation of cell proliferation	16	3.16832	0.065376	JUN, BTG1, KMT2A, ZBTB16, ING1, CDC73, PTPRF, SKI, REST, APC, PHF14, TRIM24, CTNNB1, LZTS2, JARID2, SOX4	459	384	18082	1.64143	1	1	0.990728
Larp1	7.72969e-05	0.417508	0.765	0.435	1			GOTERM_BP_DIRECT	GO:0006898~receptor-mediated endocytosis	5	0.990099	0.0653886	ATP5B, CLTC, LDLRAD3, CALR, HSP90B1	459	60	18082	3.28286	1	1	0.990728
Nktr	7.85689e-05	0.41422	0.739	0.387	1			GOTERM_BP_DIRECT	GO:0030177~positive regulation of Wnt signaling pathway	4	0.792079	0.0665595	MBD2, CDC73, SOX4, SMARCA4	459	37	18082	4.25885	1	1	0.990728
Ilkap	8.01094e-05	0.35081	0.607	0.306	1			GOTERM_BP_DIRECT	GO:0000910~cytokinesis	4	0.792079	0.0665595	AHCTF1, ARL3, MYH9, LZTS2	459	37	18082	4.25885	1	1	0.990728
Letm1	8.12294e-05	0.290175	0.491	0.177	1			GOTERM_BP_DIRECT	GO:0030900~forebrain development	6	1.18812	0.0672219	KDM2B, APLP2, ATRX, CTNNB1, POU3F1, SMARCA4	459	86	18082	2.74844	1	1	0.990728
Nufip2	8.37918e-05	0.351654	0.62	0.306	1			GOTERM_BP_DIRECT	GO:0030097~hemopoiesis	6	1.18812	0.0672219	ASXL1, AHCTF1, TIPARP, ZBTB16, CTNNB1, ZFP36L2	459	86	18082	2.74844	1	1	0.990728
Ski	8.47987e-05	0.367953	0.709	0.387	1			GOTERM_BP_DIRECT	GO:0007064~mitotic sister chromatid cohesion	3	0.594059	0.0677713	NIPBL, POGZ, SMC1A	459	17	18082	6.95194	1	1	0.990728
Sipa1l1	8.57845e-05	0.465096	0.786	0.452	1			GOTERM_BP_DIRECT	GO:0006465~signal peptide processing	3	0.594059	0.0677713	SPCS2, SPCS1, SEC11C	459	17	18082	6.95194	1	1	0.990728
Setd5	8.58783e-05	0.32796	0.692	0.371	1			GOTERM_BP_DIRECT	GO:0007507~heart development	12	2.37624	0.0692925	NIPBL, CITED2, KIF3A, SALL4, RB1CC1, MBD2, CTNNB1, MOSPD3, SOX4, SMARCA4, TTN, FOXP1	459	261	18082	1.81123	1	1	0.990728
Pdia6	8.8728e-05	0.384353	0.808	0.516	1			GOTERM_BP_DIRECT	GO:0009791~post-embryonic development	7	1.38614	0.069856	KDM5B, KMT2A, TIPARP, IREB2, GNAS, ASH1L, DICER1	459	114	18082	2.41895	1	1	0.990728
Nr2f6	8.91551e-05	0.410557	0.564	0.274	1			GOTERM_BP_DIRECT	GO:0050890~cognition	4	0.792079	0.0709624	NIPBL, KMT2A, CHD7, GNAS	459	38	18082	4.14677	1	1	0.990728
Smchd1	9.09164e-05	0.372294	0.897	0.581	1			GOTERM_BP_DIRECT	GO:0001932~regulation of protein phosphorylation	5	0.990099	0.0719813	CCDC88A, CCDC88C, TADA3, PHIP, DICER1	459	62	18082	3.17696	1	1	0.990728
Map7d2	9.4313e-05	0.351441	0.735	0.419	1			GOTERM_BP_DIRECT	GO:1901315~negative regulation of histone H2A K63-linked ubiquitination	2	0.39604	0.0740827	UBR5, TRIP12	459	3	18082	26.2629	1	1	0.990728
Tiparp	9.50455e-05	0.459873	0.688	0.371	1			GOTERM_BP_DIRECT	GO:0090526~regulation of gluconeogenesis involved in cellular glucose homeostasis	2	0.39604	0.0740827	RANBP2, OGT	459	3	18082	26.2629	1	1	0.990728
Arid4a	9.76641e-05	0.390358	0.444	0.161	1			GOTERM_BP_DIRECT	GO:1900126~negative regulation of hyaluronan biosynthetic process	2	0.39604	0.0740827	CLTC, AP2A1	459	3	18082	26.2629	1	1	0.990728
Eif4g1	9.85779e-05	0.413422	0.761	0.468	1			GOTERM_BP_DIRECT	GO:0007403~glial cell fate determination	2	0.39604	0.0740827	CTNNB1, SMARCA4	459	3	18082	26.2629	1	1	0.990728
Ehmt1	9.91831e-05	0.355634	0.543	0.258	1			GOTERM_BP_DIRECT	GO:0009612~response to mechanical stimulus	5	0.990099	0.0754001	JUN, JUND, CITED2, MBD2, TXNIP	459	63	18082	3.12653	1	1	0.990728
Rsrc2	9.94619e-05	0.329507	0.799	0.468	1			GOTERM_BP_DIRECT	GO:0030326~embryonic limb morphogenesis	5	0.990099	0.0754001	SKI, SALL4, ZBTB16, PBX2, DICER1	459	63	18082	3.12653	1	1	0.990728
Fuca1	0.000100422	0.320116	0.389	0.113	1			GOTERM_BP_DIRECT	GO:0007059~chromosome segregation	6	1.18812	0.075473	ESPL1, CENPC1, TLK2, NDC80, BRD4, SRPK1	459	89	18082	2.6558	1	1	0.990728
mt-Co2	0.000100574	0.448364	0.987	0.935	1			GOTERM_BP_DIRECT	GO:0000381~regulation of alternative mRNA splicing, via spliceosome	4	0.792079	0.0754927	HNRNPL, RBM25, FMR1, MALAT1	459	39	18082	4.04044	1	1	0.990728
Zfp638	0.000105083	0.487075	0.722	0.419	1			GOTERM_BP_DIRECT	GO:0033077~T cell differentiation in thymus	4	0.792079	0.0754927	APC, CTNNB1, TCF3, ZFP36L2	459	39	18082	4.04044	1	1	0.990728
Dpy19l1	0.000106441	0.282616	0.231	0.016	1			GOTERM_BP_DIRECT	GO:0045595~regulation of cell differentiation	4	0.792079	0.0754927	APC, CTNNB1, DICER1, TCFL5	459	39	18082	4.04044	1	1	0.990728
Utp4	0.000113772	0.331111	0.684	0.355	1			GOTERM_BP_DIRECT	GO:0003007~heart morphogenesis	5	0.990099	0.0788993	ASXL1, NIPBL, KAT6A, CHD7, TTN	459	64	18082	3.07768	1	1	0.990728
Frmd8	0.000114039	0.288932	0.286	0.065	1			GOTERM_BP_DIRECT	GO:0045787~positive regulation of cell cycle	4	0.792079	0.0801474	ANKRD17, CITED2, CALR, TCF3	459	40	18082	3.93943	1	1	0.990728
Tmed10	0.000114467	0.394125	0.803	0.548	1			GOTERM_BP_DIRECT	GO:0030901~midbrain development	4	0.792079	0.0801474	KDM2B, APLP2, CTNNB1, TAF1	459	40	18082	3.93943	1	1	0.990728
Brwd1	0.000117391	0.369804	0.731	0.403	1			GOTERM_BP_DIRECT	GO:0046034~ATP metabolic process	4	0.792079	0.0801474	ATP5B, AK2, ATP6V1B2, ATP1B1	459	40	18082	3.93943	1	1	0.990728
Usp34	0.000117682	0.461754	0.91	0.677	1			GOTERM_BP_DIRECT	GO:0042307~positive regulation of protein import into nucleus	3	0.594059	0.0824649	HYAL2, TPR, UACA	459	19	18082	6.22016	1	1	0.990728
Jsrp1	0.000120714	0.384357	0.457	0.177	1			GOTERM_BP_DIRECT	GO:0000245~spliceosomal complex assembly	3	0.594059	0.0824649	DDX39B, PRPF19, USP39	459	19	18082	6.22016	1	1	0.990728
Ddx50	0.000122725	0.404449	0.769	0.468	1			GOTERM_BP_DIRECT	GO:1901224~positive regulation of NIK/NF-kappaB signaling	3	0.594059	0.0824649	CREBBP, ACTN4, CALR	459	19	18082	6.22016	1	1	0.990728
Bms1	0.000123915	0.363223	0.825	0.565	1			GOTERM_BP_DIRECT	GO:0043409~negative regulation of MAPK cascade	3	0.594059	0.0824649	APC, DAG1, ASH1L	459	19	18082	6.22016	1	1	0.990728
Cep350	0.000126861	0.308275	0.496	0.194	1			GOTERM_BP_DIRECT	GO:0045454~cell redox homeostasis	5	0.990099	0.0824782	PDIA3, DNAJC10, P4HB, PDIA6, PDIA4	459	65	18082	3.03033	1	1	0.990728
Bptf	0.000133781	0.439699	0.825	0.532	1			GOTERM_BP_DIRECT	GO:0040018~positive regulation of multicellular organism growth	4	0.792079	0.0849236	NIPBL, CHD7, PPIB, EZR	459	41	18082	3.84335	1	1	0.990728
Ttn	0.000134272	0.332277	0.286	0.065	1			GOTERM_BP_DIRECT	GO:0006915~apoptotic process	21	4.15842	0.0881921	PPP1R15A, CASP8AP2, CUL7, RBM25, PDCD6IP, PPP1R13B, ARL6IP1, ROCK1, CADM1, DAPK3, CCAR1, CST3, BCLAF1, SLK, RNF216, DAD1, TOPAZ1, TMBIM6, SUDS3, OGT, PPID	459	570	18082	1.45137	1	1	0.990728
Mga	0.000139021	0.386865	0.671	0.339	1			GOTERM_BP_DIRECT	GO:0090263~positive regulation of canonical Wnt signaling pathway	5	0.990099	0.0898707	ASPM, UBR5, USP34, DAPK3, SOX4	459	67	18082	2.93988	1	1	0.990728
Scaf8	0.000142407	0.336321	0.534	0.226	1			GOTERM_BP_DIRECT	GO:0090398~cellular senescence	3	0.594059	0.0901435	KAT6A, SMC5, CALR	459	20	18082	5.90915	1	1	0.990728
Itga6	0.00014278	0.386401	0.444	0.194	1			GOTERM_BP_DIRECT	GO:0016055~Wnt signaling pathway	10	1.9802	0.0930634	APC, RYK, CUL3, CHD8, CCDC88C, CTR9, USP34, CTNNB1, LZTS2, CDC73	459	213	18082	1.8495	1	1	0.990728
Rbm33	0.000145635	0.318756	0.432	0.177	1			GOTERM_BP_DIRECT	GO:0000724~double-strand break repair via homologous recombination	5	0.990099	0.0936823	BLM, RAD50, SFPQ, RBBP8, SMC5	459	68	18082	2.89664	1	1	0.990728
Foxp1	0.000146985	0.426574	0.658	0.387	1			GOTERM_BP_DIRECT	GO:0001570~vasculogenesis	5	0.990099	0.0936823	CUL7, CITED2, TIPARP, CTNNB1, SMARCA4	459	68	18082	2.89664	1	1	0.990728
Hars	0.000152768	0.319829	0.547	0.242	1			GOTERM_BP_DIRECT	GO:0046777~protein autophosphorylation	9	1.78218	0.0943821	CLK1, SLK, TRIM28, DAPK3, TRIM24, CDK12, JAK1, TAF1, BRD4	459	183	18082	1.93743	1	1	0.990728
Ckap4	0.00015385	0.328371	0.393	0.145	1			GOTERM_BP_DIRECT	GO:0000226~microtubule cytoskeleton organization	6	1.18812	0.0967422	CUL7, SON, MAP7D2, VAMP4, PCNT, NINL	459	96	18082	2.46215	1	1	0.990728
Ezr	0.000154704	0.312423	0.325	0.081	1			GOTERM_BP_DIRECT	GO:0042117~monocyte activation	2	0.39604	0.0975392	HYAL2, FOXP1	459	4	18082	19.6972	1	1	0.990728
Eva1b	0.000156225	0.412675	0.611	0.306	1			GOTERM_BP_DIRECT	GO:0030174~regulation of DNA-dependent DNA replication initiation	2	0.39604	0.0975392	TEX10, WRNIP1	459	4	18082	19.6972	1	1	0.990728
Smc5	0.000160686	0.369183	0.479	0.194	1			GOTERM_BP_DIRECT	GO:0046040~IMP metabolic process	2	0.39604	0.0975392	NT5C2, ADSS	459	4	18082	19.6972	1	1	0.990728
Tex9	0.000163407	0.384479	0.397	0.161	1			GOTERM_BP_DIRECT	GO:0043620~regulation of DNA-templated transcription in response to stress	2	0.39604	0.0975392	BCLAF1, JMY	459	4	18082	19.6972	1	1	0.990728
Ubr4	0.000164018	0.389625	0.573	0.274	1			GOTERM_BP_DIRECT	GO:0071787~endoplasmic reticulum tubular network assembly	2	0.39604	0.0975392	ARL6IP1, RTN4	459	4	18082	19.6972	1	1	0.990728
Tmbim6	0.000165042	0.31935	0.765	0.435	1			GOTERM_BP_DIRECT	GO:0000711~meiotic DNA repair synthesis	2	0.39604	0.0975392	SYCP1, SYCP3	459	4	18082	19.6972	1	1	0.990728
Mllt10	0.000167811	0.391899	0.462	0.21	1			GOTERM_BP_DIRECT	GO:1903347~negative regulation of bicellular tight junction assembly	2	0.39604	0.0975392	ROCK1, ROCK2	459	4	18082	19.6972	1	1	0.990728
Nfe2l1	0.000171911	0.384161	0.739	0.468	1			GOTERM_BP_DIRECT	GO:0010626~negative regulation of Schwann cell proliferation	2	0.39604	0.0975392	SKI, DICER1	459	4	18082	19.6972	1	1	0.990728
Slc39a6	0.000175991	0.330797	0.393	0.145	1			GOTERM_BP_DIRECT	GO:0097368~establishment of Sertoli cell barrier	2	0.39604	0.0975392	ARID4A, ARID4B	459	4	18082	19.6972	1	1	0.990728
mt-Atp8	0.000182035	0.409633	0.748	0.5	1			GOTERM_BP_DIRECT	GO:0006311~meiotic gene conversion	2	0.39604	0.0975392	MSH2, TEX11	459	4	18082	19.6972	1	1	0.990728
Prrc2c	0.000182903	0.373615	0.962	0.774	1			GOTERM_BP_DIRECT	GO:0035162~embryonic hemopoiesis	3	0.594059	0.0980221	TNRC6C, KMT2A, KAT6A	459	21	18082	5.62776	1	1	0.990728
Zfp106	0.000183474	0.316677	0.688	0.371	1			GOTERM_BP_DIRECT	GO:0001829~trophectodermal cell differentiation	3	0.594059	0.0980221	CITED2, CTR9, CNOT3	459	21	18082	5.62776	1	1	0.990728
Tm9sf4	0.000188867	0.319794	0.44	0.177	1			GOTERM_BP_DIRECT	GO:0007130~synaptonemal complex assembly	3	0.594059	0.0980221	SYCP1, TEX11, SYCP3	459	21	18082	5.62776	1	1	0.990728
Gm26917	0.000190913	0.385878	0.774	0.435	1
Cnnm3	0.000194705	0.298566	0.372	0.113	1
Supt5	0.000198121	0.426827	0.915	0.661	1
Rrp8	0.000198129	0.325343	0.453	0.177	1
Kdm2b	0.000200359	0.426211	0.697	0.435	1
Nav2	0.000202695	0.305598	0.359	0.113	1
Zfp462	0.000203355	0.429503	0.722	0.403	1
2900097C17Rik	0.000208091	0.416183	0.462	0.226	1
Jun	0.000211915	0.388988	0.453	0.177	1
Thop1	0.000220144	0.361522	0.675	0.403	1
Cdk12	0.00022354	0.39958	0.782	0.5	1
Hsp90b1	0.000232303	0.475362	0.944	0.71	1
Ppp3ca	0.000234245	0.387481	0.577	0.29	1
Atp13a3	0.000235271	0.330153	0.432	0.177	1
Ttc3	0.000237743	0.438513	0.765	0.516	1
Rb1cc1	0.00024696	0.337322	0.637	0.339	1
M6pr	0.000249514	0.382005	0.675	0.371	1
Zfp846	0.000253284	0.278872	0.338	0.113	1
Dusp11	0.000259096	0.252722	0.564	0.29	1
Tyw1	0.000264723	0.326022	0.385	0.145	1
Sycp3	0.000267619	0.429476	0.842	0.581	1
Bclaf1	0.000273244	0.44645	0.91	0.645	1
Dag1	0.000279567	0.398129	0.59	0.306	1
Ryk	0.000284074	0.346407	0.603	0.339	1
Ppp1r15a	0.000285305	0.26988	0.436	0.177	1
Ankrd12	0.000288887	0.47002	0.812	0.5	1
Gatad2a	0.0002926	0.381081	0.744	0.5	1
Gpatch8	0.000293641	0.321639	0.756	0.468	1
Erg28	0.000296152	0.376818	0.752	0.435	1
Chd1	0.000297734	0.334729	0.389	0.145	1
Nt5m	0.00029906	0.254049	0.278	0.065	1
Iars2	0.000299433	0.311144	0.632	0.371	1
Mprip	0.000303178	0.381338	0.714	0.435	1
Brd1	0.00030441	0.282583	0.761	0.484	1
Taok2	0.000308224	0.285864	0.303	0.081	1
Sall4	0.000312125	0.274561	0.778	0.468	1
Gas8	0.000316936	0.277982	0.423	0.145	1
Myo9a	0.000321963	0.34596	0.474	0.226	1
Tmem101	0.000322573	0.334386	0.385	0.161	1
Rbms2	0.000326541	0.379853	0.577	0.323	1
Dync1h1	0.000331203	0.344305	0.756	0.452	1
Tra2a	0.0003314	0.360551	0.697	0.403	1
Sclt1	0.000331841	0.299794	0.278	0.065	1
2210016L21Rik	0.000340737	0.320704	0.504	0.226	1
Actn4	0.000354431	0.362887	0.474	0.242	1
Ccdc167	0.0003589	0.284557	0.256	0.048	1
Lzts2	0.000361351	0.374435	0.342	0.113	1
Tmed9	0.000369917	0.390465	0.897	0.581	1
Arglu1	0.000370806	0.380963	0.825	0.516	1
Zfp36l2	0.000390508	0.367663	0.543	0.274	1
Asxl1	0.000401832	0.318824	0.603	0.323	1
Coq3	0.000405472	0.281811	0.406	0.145	1
Nrd1	0.000408975	0.38997	0.692	0.468	1
Gtf2i	0.00041282	0.296567	0.53	0.274	1
Taf1d	0.000431226	0.38805	0.923	0.71	1
Dnpep	0.000437656	0.285886	0.474	0.242	1
Edf1	0.000439941	0.360843	0.88	0.613	1
Sec11c	0.000452381	0.293294	0.244	0.048	1
Ccar1	0.000455583	0.423102	0.688	0.435	1
Mkln1	0.000458361	0.305221	0.581	0.323	1
Isyna1	0.000478454	0.30603	0.966	0.806	1
Ndufa11	0.000479091	0.265694	0.974	0.871	1
Nsmce3	0.000480242	0.293192	0.35	0.129	1
Mrpl54	0.000492902	0.327812	0.752	0.468	1
Ndc80	0.000494729	0.306674	0.47	0.21	1
Ppil2	0.000494842	0.321612	0.607	0.339	1
Cep295	0.000497237	0.29059	0.577	0.29	1
Ak2	0.000509212	0.254415	0.714	0.484	1
Acot7	0.0005116	0.289277	0.303	0.081	1
Ep400	0.000518457	0.312702	0.756	0.452	1
Las1l	0.000526017	0.299633	0.513	0.258	1
Cep164	0.000535542	0.302408	0.496	0.242	1
Ttc33	0.000535881	0.257891	0.453	0.21	1
Smc1a	0.000542448	0.303964	0.701	0.419	1
Rif1	0.000548662	0.38832	0.752	0.484	1
Tkt	0.00055709	0.288942	0.44	0.21	1
Dapk3	0.000565237	0.302041	0.641	0.371	1
Rtn1	0.000587845	0.306754	0.316	0.097	1
Ncapd3	0.000601389	0.31748	0.679	0.419	1
Brd3	0.000613359	0.320707	0.855	0.613	1
Atp6v1b2	0.000613557	0.280166	0.594	0.29	1
Trim24	0.000616822	0.35515	0.5	0.29	1
Nck1	0.000618521	0.293201	0.692	0.403	1
Uaca	0.000632312	0.269994	0.282	0.081	1
Tcf3	0.000632466	0.354205	0.688	0.403	1
Srrm1	0.000639857	0.364282	0.923	0.661	1
P4hb	0.000646869	0.434949	0.812	0.581	1
Ap2a1	0.000651715	0.32753	0.534	0.258	1
Kansl1	0.000656593	0.311703	0.573	0.29	1
Slc16a11	0.000677311	0.359634	0.504	0.274	1
Washc2	0.000680651	0.274056	0.615	0.339	1
Cntrl	0.000692921	0.275255	0.444	0.21	1
Usp48	0.000744739	0.294884	0.457	0.21	1
Zfp292	0.000749062	0.297763	0.684	0.387	1
Psmg1	0.000751988	0.352392	0.816	0.581	1
Zscan18	0.000755749	0.267577	0.303	0.097	1
Senp6	0.000760198	0.324709	0.603	0.371	1
Odc1	0.000760766	0.331429	0.679	0.419	1
Clip1	0.000769978	0.253988	0.329	0.113	1
Tex264	0.000776148	0.33426	0.44	0.226	1
Ctr9	0.00078171	0.303172	0.564	0.323	1
Scaper	0.000791166	0.315379	0.654	0.387	1
Irf2bp2	0.000793243	0.30855	0.303	0.113	1
Large2	0.000801424	0.371416	0.483	0.258	1
Nr1d2	0.000808367	0.274323	0.316	0.113	1
Clk1	0.000816734	0.315375	0.338	0.129	1
Rest	0.0008206	0.45525	0.902	0.694	1
Tsacc	0.000834817	0.266184	0.286	0.081	1
Snrnp48	0.00086246	0.295476	0.513	0.29	1
Nt5c2	0.00087479	0.274072	0.53	0.274	1
Senp3	0.00090185	0.302665	0.679	0.387	1
Eef2	0.000905187	0.278954	0.996	0.935	1
Tcerg1	0.000906948	0.399214	0.769	0.5	1
mt-Nd2	0.000915386	0.3714	0.966	0.887	1
Rnf216	0.000932721	0.318504	0.778	0.5	1
Gcc2	0.000944637	0.258655	0.427	0.21	1
Atp1b1	0.000950945	0.262372	0.325	0.113	1
Usp7	0.000957567	0.346349	0.774	0.484	1
Calr	0.000973994	0.34155	0.88	0.71	1
Pdia3	0.000999446	0.325914	0.94	0.694	1
Zc3h13	0.00100163	0.3656	0.735	0.435	1
Ccdc191	0.0010027	0.346319	0.53	0.323	1
Pcnt	0.00100332	0.310629	0.466	0.226	1
Dad1	0.00101581	0.263154	0.91	0.774	1
Ireb2	0.00102236	0.25287	0.453	0.226	1
Stk31	0.0010237	0.330123	0.863	0.629	1
mt-Atp6	0.00102867	0.393786	0.996	0.952	1
Msi2	0.00104509	0.393126	0.709	0.435	1
Usp16	0.00106147	0.275005	0.551	0.306	1
Gtf2a1	0.00106971	0.326094	0.62	0.355	1
Sec62	0.00107438	0.390273	0.872	0.581	1
Dnaja1	0.00107512	0.262403	0.996	0.871	1
Cdc73	0.00107548	0.359296	0.402	0.194	1
Spint1	0.00110926	0.279453	0.406	0.177	1
Ppp1r13b	0.00111098	0.274307	0.41	0.177	1
Ganab	0.0011301	0.281637	0.509	0.29	1
Canx	0.00116736	0.345019	0.637	0.339	1
Tmem33	0.00116805	0.27426	0.389	0.177	1
Vps13c	0.00117038	0.270803	0.457	0.226	1
Mospd3	0.00119261	0.251853	0.376	0.161	1
Ubr2	0.00121511	0.282146	0.491	0.226	1
Lman2	0.00121566	0.285589	0.731	0.419	1
2810004N23Rik	0.00122259	0.323069	0.897	0.613	1
Trim28	0.00122822	0.294237	0.833	0.5	1
Chaf1a	0.00124039	0.348665	0.415	0.21	1
Snrnp200	0.00124171	0.356324	0.756	0.484	1
Fos	0.00125588	0.30861	0.41	0.177	1
Atp9a	0.00125889	0.253033	0.53	0.274	1
Tcfl5	0.00126149	0.308477	0.718	0.435	1
Midn	0.00126345	0.32883	0.581	0.355	1
Ankrd11	0.00129211	0.399496	0.85	0.613	1
Rtn4	0.00129644	0.337757	0.697	0.419	1
Ube2h	0.00131342	0.296167	0.658	0.419	1
4932438A13Rik	0.00132129	0.375389	0.611	0.371	1
mt-Nd5	0.00135204	0.395799	0.838	0.613	1
Snhg8	0.00137172	0.304131	0.517	0.274	1
Ldlrad3	0.00138389	0.301816	0.282	0.097	1
Upf3b	0.00139914	0.36093	0.406	0.194	1
Ubr5	0.00140093	0.270003	0.701	0.435	1
Sars	0.00140547	0.319139	0.855	0.661	1
Ogt	0.00140732	0.293859	0.432	0.226	1
Lars2	0.00141386	0.352936	0.714	0.484	1
Sptbn1	0.00142864	0.384528	0.684	0.435	1
Ftsj3	0.00142903	0.283795	0.765	0.468	1
Mfge8	0.00143032	0.25206	0.658	0.371	1
6030458C11Rik	0.00144392	0.267547	0.346	0.129	1
Swt1	0.00146156	0.285975	0.671	0.435	1
Aff3	0.0014801	0.26268	0.35	0.145	1
Pou2f1	0.00148375	0.27209	0.376	0.161	1
Tmem107	0.00148672	0.292787	0.453	0.226	1
Pdia4	0.00148793	0.2998	0.585	0.323	1
Dgcr8	0.00150512	0.261465	0.321	0.113	1
Ints3	0.00151912	0.252025	0.419	0.21	1
Lpcat3	0.00153085	0.28639	0.333	0.129	1
Tspan3	0.00154772	0.31087	0.769	0.484	1
Zbtb43	0.00156024	0.270965	0.53	0.323	1
Pogz	0.00158293	0.263813	0.5	0.29	1
Kif3a	0.00160443	0.358195	0.714	0.5	1
Hspa5	0.00164517	0.375917	0.876	0.597	1
Huwe1	0.001652	0.388922	0.842	0.548	1
Golga4	0.00167302	0.25232	0.517	0.306	1
Ddx27	0.00167614	0.303947	0.825	0.597	1
Ergic2	0.0016926	0.327673	0.846	0.597	1
Orai1	0.00169608	0.283922	0.385	0.161	1
Ttf1	0.00173037	0.330791	0.368	0.194	1
Hyal2	0.00175334	0.271372	0.483	0.242	1
Camsap1	0.001768	0.257169	0.607	0.306	1
Mrpl37	0.00177474	0.269949	0.53	0.323	1
Plvap	0.00177927	0.392805	0.218	0.048	1
Tpm1	0.0017801	0.271201	0.628	0.387	1
Ddx39b	0.00178759	0.291563	0.91	0.71	1
Atp2c1	0.00180002	0.263535	0.295	0.113	1
Elovl6	0.00181311	0.259323	0.385	0.177	1
Arl6ip1	0.00182658	0.407542	0.872	0.581	1
Supt16	0.00184737	0.250939	0.949	0.855	1
Atp5b	0.00190385	0.265656	0.996	0.968	1
mt-Cytb	0.00191333	0.423631	0.957	0.919	1
Phf20	0.00194107	0.392557	0.791	0.532	1
Ggnbp2	0.00194457	0.28837	0.85	0.597	1
Cst3	0.0019456	0.288496	0.91	0.661	1
Hypk	0.00199711	0.281885	0.59	0.306	1
BC005561	0.00203381	0.329634	0.5	0.29	1
Cenpc1	0.00204862	0.263134	0.278	0.097	1
Ccdc88c	0.00205719	0.2953	0.581	0.339	1
Hirip3	0.0020654	0.260793	0.564	0.323	1
Supt6	0.00210808	0.310833	0.756	0.5	1
Alg1	0.00211008	0.252433	0.248	0.081	1
Sbk1	0.00211792	0.288859	0.376	0.161	1
Enkd1	0.00213143	0.283726	0.376	0.177	1
Sfpq	0.00216407	0.360772	0.97	0.839	1
Ccnf	0.00217606	0.283352	0.355	0.177	1
Stk35	0.00219305	0.263621	0.397	0.194	1
Tasor2	0.00220244	0.290374	0.679	0.419	1
Ahctf1	0.00222289	0.271269	0.632	0.371	1
Tdrd1	0.00225265	0.250573	0.598	0.355	1
Arfgef1	0.00225556	0.282066	0.551	0.323	1
Tktl1	0.00226999	0.267277	0.312	0.129	1
Cadm1	0.00233502	0.336853	0.637	0.403	1
Cdkn1c	0.00237355	0.358544	0.603	0.355	1
Selenos	0.00238262	0.285386	0.47	0.242	1
Zbed5	0.00239889	0.294072	0.53	0.323	1
Bod1l	0.00242699	0.36367	0.611	0.355	1
Cited2	0.00242782	0.28503	0.47	0.29	1
Tex13b	0.00244118	0.283837	0.457	0.226	1
Rbbp8	0.00247165	0.259778	0.457	0.226	1
Surf4	0.00249174	0.302488	0.667	0.452	1
Mettl26	0.00251201	0.293907	0.389	0.194	1
Med13l	0.00254116	0.359925	0.581	0.339	1
Btaf1	0.00257872	0.279266	0.389	0.21	1
Kmt2c	0.00259122	0.309055	0.53	0.323	1
Pdcd6ip	0.00259162	0.258109	0.427	0.21	1
Usp39	0.00262275	0.257372	0.415	0.226	1
Ing1	0.00269539	0.254447	0.397	0.21	1
Igf2bp1	0.00272139	0.32062	0.692	0.452	1
Rnf6	0.00275345	0.273677	0.705	0.468	1
Htatsf1	0.00275486	0.256023	0.671	0.403	1
Kdm5b	0.00278126	0.347447	0.906	0.661	1
Ctsd	0.0027836	0.338343	0.769	0.516	1
Sptlc2	0.00278799	0.310235	0.577	0.355	1
Mea1	0.00286277	0.322522	0.838	0.645	1
Btg1	0.00287258	0.250259	0.432	0.21	1
Dicer1	0.00293851	0.270143	0.735	0.452	1
Gatad2b	0.00295268	0.275788	0.466	0.242	1
Lrrfip1	0.00300402	0.271239	0.355	0.161	1
Ccdc84	0.00300721	0.263433	0.363	0.161	1
Slc39a7	0.0030174	0.260267	0.551	0.306	1
Aspm	0.00302496	0.26434	0.269	0.097	1
Srpk1	0.00304066	0.34121	0.812	0.532	1
Mageb4	0.00304799	0.258723	0.812	0.516	1
Scmh1	0.0030543	0.277232	0.462	0.242	1
Itpr3	0.00306413	0.305605	0.308	0.129	1
Ssrp1	0.00307135	0.304023	0.85	0.661	1
Spg11	0.00311588	0.253246	0.274	0.113	1
Suds3	0.00313861	0.253325	0.709	0.468	1
Akap11	0.00321057	0.269811	0.594	0.339	1
Maco1	0.00324609	0.259958	0.816	0.516	1
Msh2	0.0032722	0.291036	0.739	0.516	1
Snrnp35	0.00329435	0.25498	0.286	0.113	1
Dock9	0.00331897	0.27214	0.291	0.113	1
Rmi1	0.00332912	0.287768	0.38	0.194	1
Blm	0.00337642	0.266105	0.372	0.161	1
Trap1	0.00339233	0.254656	0.509	0.274	1
Myh9	0.00344282	0.284696	0.462	0.258	1
Rsrp1	0.00349763	0.328099	0.521	0.323	1
Napa	0.00351706	0.277545	0.295	0.129	1
Inpp5f	0.00358473	0.287179	0.573	0.387	1
Rev1	0.00359439	0.264929	0.487	0.274	1
Mdn1	0.00359781	0.304699	0.833	0.532	1
Tex11	0.00361286	0.28799	0.509	0.29	1
Sox4	0.00365394	0.329444	0.949	0.661	1
mt-Nd4l	0.00366946	0.269066	0.846	0.565	1
Ssbp3	0.00373073	0.259245	0.842	0.565	1
Cdc42bpb	0.00373856	0.263982	0.303	0.129	1
Espl1	0.00376432	0.266584	0.282	0.113	1
Wrnip1	0.00378906	0.273633	0.368	0.177	1
Txnip	0.00392265	0.339526	0.855	0.645	1
Plekhg2	0.00392975	0.282387	0.397	0.21	1
Fmr1	0.00393779	0.283241	0.709	0.484	1
Gkap1	0.00393847	0.306	0.833	0.565	1
Sptan1	0.00397715	0.266393	0.795	0.532	1
Dym	0.00398149	0.2961	0.479	0.29	1
Rab6a	0.00401115	0.272447	0.675	0.403	1
Tent4b	0.00406337	0.275353	0.286	0.129	1
Ssr1	0.00414353	0.341674	0.718	0.5	1
Wac	0.00415103	0.302544	0.534	0.339	1
Dst	0.00433111	0.305907	0.423	0.226	1
Asrgl1	0.0043317	0.2797	0.291	0.129	1
Nop14	0.00443182	0.351828	0.893	0.661	1
Prrc2a	0.00452403	0.253906	0.726	0.484	1
Utp20	0.0045304	0.287411	0.573	0.355	1
Smarca4	0.0045896	0.250146	0.833	0.581	1
Baz2a	0.00459235	0.374586	0.65	0.452	1
Kat6a	0.00459329	0.287263	0.598	0.371	1
Mysm1	0.00472537	0.280807	0.496	0.323	1
Pom121	0.00478448	0.28781	0.35	0.161	1
Snhg11	0.00479672	0.250753	0.487	0.306	1
Tlk2	0.004814	0.280243	0.62	0.419	1
Cul7	0.00484422	0.255074	0.342	0.161	1
Mesd	0.00488226	0.301688	0.444	0.242	1
Ndufb4	0.00510961	0.277834	0.88	0.694	1
Spcs2	0.00513103	0.287566	0.859	0.694	1
Phf14	0.0052497	0.254774	0.628	0.419	1
Rbm39	0.00530653	0.27491	0.991	0.871	1
Cltc	0.00536696	0.255019	0.654	0.419	1
Usp37	0.00547599	0.262194	0.47	0.258	1
Prpf39	0.00561277	0.256112	0.321	0.145	1
Pou3f1	0.00570654	0.286324	0.59	0.355	1
Dcaf12	0.00578417	0.256977	0.41	0.258	1
Vamp4	0.00581026	0.283493	0.278	0.129	1
Zfp148	0.005851	0.254521	0.487	0.29	1
Ninl	0.00585818	0.26164	0.521	0.258	1
Rrs1	0.00588755	0.272429	0.556	0.387	1
Serf1	0.00596765	0.345436	0.979	0.839	1
Brd4	0.00600746	0.330538	0.748	0.5	1
Ddost	0.00604734	0.346567	0.863	0.645	1
Ppm1b	0.00609742	0.252633	0.538	0.339	1
Pelp1	0.00612332	0.288161	0.628	0.435	1
Stau1	0.00615346	0.283063	0.62	0.403	1
Hnrnpl	0.00617703	0.280047	0.654	0.403	1
Irgm1	0.00617825	0.461928	0.192	0.048	1
Laptm4a	0.00620788	0.254756	0.821	0.516	1
Mier1	0.00622679	0.257962	0.927	0.726	1
Tex10	0.00626678	0.267888	0.782	0.581	1
Ssbp2	0.00626749	0.260242	0.372	0.194	1
Chd1l	0.00642369	0.292028	0.598	0.387	1
Adh5	0.00643351	0.258542	0.808	0.548	1
Cnot3	0.0064947	0.313288	0.791	0.548	1
Cpsf3	0.00680126	0.280939	0.573	0.371	1
Cul3	0.00713764	0.278285	0.876	0.613	1
Dnajc10	0.00714973	0.279323	0.551	0.339	1
Mis18bp1	0.00724294	0.29846	0.449	0.274	1
Jak1	0.00734394	0.310046	0.829	0.581	1
Hist1h1e	0.00746146	0.26717	0.338	0.161	1
Cd164	0.00758599	0.264023	0.752	0.468	1
Gnas	0.00768219	0.288791	0.735	0.532	1
Jmy	0.00773752	0.274349	0.449	0.258	1
Zfhx3	0.0077519	0.279832	0.462	0.29	1
B230354K17Rik	0.00793939	0.296168	0.325	0.177	1
Nop56	0.00794896	0.306931	0.889	0.677	1
Ranbp2	0.00802868	0.316242	0.679	0.484	1
Ppp4r2	0.00804328	0.304713	0.923	0.758	1
Mbd2	0.00814821	0.257683	0.577	0.371	1
Ints6	0.00821442	0.290466	0.718	0.452	1
Mcm3	0.00825173	0.32652	0.803	0.548	1
Cyc1	0.00828186	0.254153	0.923	0.677	1
Hnrnpul2	0.00844241	0.257662	0.816	0.629	1
Pgp	0.00859315	0.281088	0.919	0.694	1
Helz	0.00864347	0.265888	0.645	0.419	1
Prpf19	0.00876048	0.268296	0.744	0.516	1
Slk	0.00883373	0.259808	0.585	0.371	1
Adss	0.00921137	0.260566	0.62	0.435	1
Hnrnpr	0.00942472	0.280553	0.774	0.516	1
Ctnnb1	0.00950511	0.257213	0.752	0.484	1

## Sheet: Fig6-S2AB-2
USPG2 up-regulated gene							GO
	p_val	avg_log2FC	pct.1	pct.2	p_val_adj		Category	Term	Count	%	PValue	Genes	List Total	Pop Hits	Pop Total	Fold Enrichment	Bonferroni	Benjamini	FDR
Ftl1	5.28694e-11	-0.528709	1	1	1.23239e-06		GOTERM_BP_DIRECT	GO:0006412~translation	13	12.8713	6.91706e-07	EIF5A, RPS9, RPL10, RPL12, RPS27L, EIF2S2, RPL9, EIF1, EEF1B2, EIF3M, RPL36AL, RPL13, RPS12	91	401	18082	6.44175	0.000417703	0.000417791	0.000417791
Tpt1	6.86754e-09	-0.47592	1	1	0.000160082		GOTERM_BP_DIRECT	GO:0010273~detoxification of copper ion	3	2.9703	0.000146047	MT2, MT1, PARK7	91	4	18082	149.027	0.0844394	0.0441062	0.0441062
1500009L16Rik	1.2906e-08	-1.0001	0.547	0.774	0.000300838		GOTERM_BP_DIRECT	GO:0006163~purine nucleotide metabolic process	3	2.9703	0.00067276	GUK1, NME2, NME1	91	8	18082	74.5137	0.334012	0.135449	0.135449
Rpl13	3.64801e-08	-0.311362	1	1	0.000850351		GOTERM_BP_DIRECT	GO:0000027~ribosomal large subunit assembly	3	2.9703	0.0073674	RPL10, RPL12, MRTO4	91	26	18082	22.9273	0.988511	1	1
Fth1	1.00383e-07	-0.611505	1	1	0.00233993		GOTERM_BP_DIRECT	GO:2000379~positive regulation of reactive oxygen species metabolic process	3	2.9703	0.0103728	EIF5A, CDKN1A, ROMO1	91	31	18082	19.2294	0.99816	1	1
Nme2	1.05095e-07	-0.42133	1	1	0.00244977		GOTERM_BP_DIRECT	GO:0006446~regulation of translational initiation	3	2.9703	0.0117026	EIF3M, EIF4EBP1, EIF1	91	33	18082	18.0639	0.999183	1	1
Chchd10	3.31137e-06	-0.668421	0.752	0.823	0.0771881		GOTERM_BP_DIRECT	GO:0002762~negative regulation of myeloid leukocyte differentiation	2	1.9802	0.0148586	NME2, NME1	91	3	18082	132.469	0.999882	1	1
H2afz	3.63952e-06	-0.507017	0.987	0.984	0.0848372		GOTERM_BP_DIRECT	GO:0015031~protein transport	8	7.92079	0.0281423	EIF5A, RAB2A, ATG3, MTX2, CHMP2A, TOMM5, TOMM6, SNX6	91	592	18082	2.68518	1	1	1
Rpl12	5.15515e-06	-0.308503	1	1	0.120167		GOTERM_BP_DIRECT	GO:0006413~translational initiation	3	2.9703	0.0296552	EIF3M, EIF2S2, EIF1	91	54	18082	11.0391	1	1	1
Rps27l	1.22668e-05	-0.57635	0.944	0.919	0.28594		GOTERM_BP_DIRECT	GO:0010976~positive regulation of neuron projection development	4	3.9604	0.0315799	RANBP1, NME2, UBE2V2, NME1	91	138	18082	5.75952	1	1	1
Rps12	1.44822e-05	-0.377483	1	1	0.33758		GOTERM_BP_DIRECT	GO:0000082~G1/S transition of mitotic cell cycle	3	2.9703	0.0382028	RANBP1, CDKN1A, EIF4EBP1	91	62	18082	9.61468	1	1	1
Timm23	1.88427e-05	-0.488526	0.927	0.903	0.439224		GOTERM_BP_DIRECT	GO:0051099~positive regulation of binding	2	1.9802	0.0391392	DPH3, S100A10	91	8	18082	49.6758	1	1	1
S100a10	2.34799e-05	-0.585956	0.15	0.371	0.547316		GOTERM_BP_DIRECT	GO:0006220~pyrimidine nucleotide metabolic process	2	1.9802	0.0391392	NME2, NME1	91	8	18082	49.6758	1	1	1
Ptma	2.44733e-05	-0.352902	1	1	0.570473		GOTERM_BP_DIRECT	GO:0006241~CTP biosynthetic process	2	1.9802	0.0439239	NME2, NME1	91	9	18082	44.1563	1	1	1
Bax	2.74503e-05	-0.488678	0.932	0.919	0.639866		GOTERM_BP_DIRECT	GO:0006228~UTP biosynthetic process	2	1.9802	0.0439239	NME2, NME1	91	9	18082	44.1563	1	1	1
Ifitm2	5.11619e-05	-0.653292	0.325	0.548	1		GOTERM_BP_DIRECT	GO:0043524~negative regulation of neuron apoptotic process	4	3.9604	0.0457071	UBE2V2, BAX, MT1, PARK7	91	160	18082	4.96758	1	1	1
Arpp19	7.35884e-05	-0.366641	0.966	0.952	1		GOTERM_BP_DIRECT	GO:0043653~mitochondrial fragmentation involved in apoptotic process	2	1.9802	0.048685	ATG3, BAX	91	10	18082	39.7407	1	1	1
Pomp	8.7916e-05	-0.43184	0.979	1	1		GOTERM_BP_DIRECT	GO:0006880~intracellular sequestering of iron ion	2	1.9802	0.0534226	FTL1, FTH1	91	11	18082	36.1279	1	1	1
Gng5	0.000124322	-0.277892	1	1	1		GOTERM_BP_DIRECT	GO:0006183~GTP biosynthetic process	2	1.9802	0.0534226	NME2, NME1	91	11	18082	36.1279	1	1	1
Park7	0.000128599	-0.411739	0.983	0.952	1		GOTERM_BP_DIRECT	GO:0009142~nucleoside triphosphate biosynthetic process	2	1.9802	0.0581369	NME2, NME1	91	12	18082	33.1172	1	1	1
Srp9	0.000135634	-0.465491	0.962	0.903	1		GOTERM_BP_DIRECT	GO:0045926~negative regulation of growth	2	1.9802	0.0581369	MT2, MT1	91	12	18082	33.1172	1	1	1
Erh	0.000166244	-0.455328	0.885	0.871	1		GOTERM_BP_DIRECT	GO:0010038~response to metal ion	2	1.9802	0.0581369	MT2, MT1	91	12	18082	33.1172	1	1	1
Rpl36al	0.000184765	-0.377837	0.996	0.984	1		GOTERM_BP_DIRECT	GO:0071294~cellular response to zinc ion	2	1.9802	0.0581369	MT2, MT1	91	12	18082	33.1172	1	1	1
Rps9	0.000223003	-0.27958	1	1	1		GOTERM_BP_DIRECT	GO:0007263~nitric oxide mediated signal transduction	2	1.9802	0.0721409	MT2, MT1	91	15	18082	26.4938	1	1	1
Afp	0.000241838	-0.553146	0.842	0.887	1		GOTERM_BP_DIRECT	GO:0006165~nucleoside diphosphate phosphorylation	2	1.9802	0.0721409	NME2, NME1	91	15	18082	26.4938	1	1	1
Polr1d	0.000261284	-0.429478	0.91	0.919	1		GOTERM_BP_DIRECT	GO:0006882~cellular zinc ion homeostasis	2	1.9802	0.085939	MT2, MT1	91	18	18082	22.0781	1	1	1
Gm47283	0.000296557	-0.772966	0.534	0.613	1		GOTERM_BP_DIRECT	GO:0008283~cell proliferation	4	3.9604	0.0970056	MORF4L1, PRDX1, BAX, PARK7	91	220	18082	3.61279	1	1	1
Rmi2	0.000306084	-0.28849	0.038	0.161	1
Gm10076	0.000307598	-0.44026	1	1	1
Sumo2	0.000310578	-0.293802	1	1	1
Tomm6	0.000374729	-0.387799	0.957	0.935	1
Rpl9	0.000402062	-0.255258	1	1	1
Atp5o	0.000494601	-0.345354	0.987	0.968	1
Dph3	0.000595501	-0.434952	0.872	0.839	1
Cox8a	0.000595644	-0.267244	1	1	1
Ndufv2	0.000596557	-0.438255	0.795	0.839	1
Rpl10	0.000621801	-0.326221	0.983	0.968	1
Chmp2a	0.000780258	-0.415465	0.927	0.984	1
Cth	0.000796274	-0.346385	0.043	0.161	1
Prdx1	0.000883814	-0.287746	1	1	1
Nme1	0.000924321	-0.29104	0.996	0.984	1
Sub1	0.000960823	-0.288899	1	1	1
Tmem14c	0.00096938	-0.429579	0.816	0.823	1
Fam241a	0.00121512	-0.474191	0.342	0.5	1
Eif1	0.00124517	-0.380008	0.996	1	1
Eif2s2	0.00127824	-0.411754	0.996	0.952	1
Hoxb8	0.001279	-0.350591	0.03	0.129	1
Ak6	0.0014284	-0.547523	0.667	0.742	1
Snrpd3	0.00178259	-0.372715	0.906	0.935	1
Rfc4	0.00180444	-0.375856	0.859	0.871	1
Gng12	0.00183485	-0.328219	0.808	0.79	1
Eef1b2	0.00199159	-0.280666	1	1	1
Ccdc25	0.0020688	-0.50618	0.718	0.742	1
Txndc17	0.00220681	-0.373429	0.756	0.79	1
Mt1	0.00230938	-0.443147	1	1	1
Cdkn1a	0.00253196	-0.299633	0.103	0.242	1
Tomm5	0.00259122	-0.561122	0.462	0.581	1
Eif3m	0.00272595	-0.341922	0.932	0.887	1
Ube2e3	0.00280721	-0.398576	0.88	0.823	1
Rheb	0.00300012	-0.392373	0.752	0.774	1
Eif5a	0.0033217	-0.280286	0.996	0.968	1
Lyar	0.00334562	-0.388939	0.923	0.855	1
Uqcr11	0.00335755	-0.290966	0.987	0.968	1
Zfp688	0.00360098	-0.272964	0.158	0.323	1
Romo1	0.00371306	-0.293628	0.944	0.919	1
Esd	0.00383557	-0.335261	0.953	0.952	1
Eif4ebp1	0.00399641	-0.47669	0.799	0.806	1
Mrto4	0.00415583	-0.364072	0.812	0.855	1
Pfn1	0.00416537	-0.350293	1	0.984	1
Hmgb2	0.00423167	-0.347125	0.987	0.984	1
Plekhj1	0.00441189	-0.404994	0.701	0.71	1
Cenpa	0.00455109	-0.329062	0.846	0.806	1
Snx6	0.0045827	-0.284622	0.944	0.871	1
1110004F10Rik	0.00484263	-0.38779	0.915	0.871	1
Mrpl42	0.00512949	-0.299306	0.953	0.935	1
Mtx2	0.00514581	-0.471128	0.803	0.774	1
Cebpzos	0.00543334	-0.462547	0.423	0.548	1
Dctpp1	0.00547005	-0.306606	0.927	0.839	1
Gsto1	0.00571177	-0.37027	0.53	0.613	1
Ube2v2	0.00571545	-0.43622	0.803	0.79	1
Arpc5l	0.00576057	-0.352229	0.842	0.823	1
Snrpc	0.00581674	-0.402856	0.957	0.903	1
Banf1	0.00611983	-0.393082	0.944	0.935	1
Capza2	0.00627122	-0.429029	0.769	0.726	1
Ranbp1	0.00654078	-0.356007	0.974	0.968	1
Anapc13	0.00707557	-0.292171	0.936	0.871	1
Guk1	0.00712088	-0.44264	0.692	0.758	1
Acsbg1	0.00716084	-0.260166	0.162	0.306	1
Mt2	0.00723193	-0.289275	0.991	0.935	1
Stmn1	0.00730473	-0.281433	1	1	1
Atg3	0.00740692	-0.359805	0.41	0.532	1
Pir	0.00745319	-0.335956	0.188	0.339	1
Tbca	0.0076584	-0.413195	0.846	0.839	1
Cfdp1	0.00779101	-0.303688	0.915	0.903	1
Asb9	0.00780883	-0.525213	0.389	0.5	1
Frg1	0.0079851	-0.382849	0.829	0.823	1
Marcksl1	0.008364	-0.308462	0.923	0.839	1
Mrps33	0.00881162	-0.34667	0.829	0.758	1
Snhg9	0.00886901	-0.479032	0.769	0.806	1
Rab2a	0.00900623	-0.27411	0.855	0.839	1
Morf4l1	0.00922934	-0.263715	0.962	0.952	1
Abcf2	0.00934931	-0.390541	0.726	0.677	1
Fbl	0.00943541	-0.300961	0.979	0.968	1

## Sheet: Fig6-S2CD-1
DSPG1 down-regulated gene							GO
	p_val	avg_log2FC	pct.1	pct.2	p_val_adj		Category	Term	Count	%	PValue	Genes	List Total	Pop Hits	Pop Total	Fold Enrichment	Bonferroni	Benjamini	FDR
Srsf10	4.85641e-19	0.868162	0.934	0.708	1.13203e-14		GOTERM_BP_DIRECT	GO:0006397~mRNA processing	10	8.19672	0.000144242	PNN, PRPF38B, SF3B3, PDCD11, ESRP1, SUPT5, GEMIN5, CDK12, HNRNPA1, SRSF10	110	322	18082	5.10503	0.0904216	0.0947673	0.0947673
Edf1	9.01242e-11	0.652443	0.941	0.697	2.10079e-06		GOTERM_BP_DIRECT	GO:0008380~RNA splicing	8	6.55738	0.000644142	PNN, PRPF38B, SF3B3, ESRP1, GEMIN5, CDK12, HNRNPA1, SRSF10	110	241	18082	5.45666	0.345142	0.211601	0.211601
Mrpl54	5.83218e-09	0.554143	0.875	0.629	0.000135948		GOTERM_BP_DIRECT	GO:0007283~spermatogenesis	9	7.37705	0.0032355	BCAP31, TDRD1, TDRKH, STRA8, PLEKHA1, AKAP9, SYCP3, CALR, 4932438A13RIK	110	407	18082	3.63498	0.881064	0.592719	0.592719
mt-Co1	1.41298e-08	0.718844	0.996	0.944	0.000329365		GOTERM_BP_DIRECT	GO:0007049~cell cycle	11	9.01639	0.00396534	RAD50, ZFP830, CDC16, CKAP2, MCM3, BUB1B, KNL1, SYCP3, KIF20B, PPM1G, HCFC1	110	614	18082	2.94495	0.926496	0.592719	0.592719
mt-Nd5	2.82746e-08	0.702408	0.777	0.494	0.000659081		GOTERM_BP_DIRECT	GO:0000122~negative regulation of transcription from RNA polymerase II promoter	12	9.83607	0.0045108	CREBBP, MYEF2, NCOR1, JUND, SUPT5, HIST1H1E, CALR, PPID, NR2F6, HCFC1, BPTF, FOXP1	110	729	18082	2.70587	0.948712	0.592719	0.592719
Taf1d	3.22704e-08	0.507595	0.949	0.876	0.000752223		GOTERM_BP_DIRECT	GO:0006915~apoptotic process	10	8.19672	0.00755086	BCAP31, SCML2, ARL6IP1, SIVA1, TOPAZ1, CKAP2, BUB1B, HRAS, FOXO1, PPID	110	570	18082	2.88389	0.993124	0.696844	0.696844
Ppid	6.72348e-08	0.509515	0.897	0.697	0.00156724		GOTERM_BP_DIRECT	GO:0006355~regulation of transcription, DNA-templated	24	19.6721	0.0084958	CREBBP, JUND, FIGLA, MCRS1, EDF1, FOXO1, NR2F6, FOXP1, HCFC1, STRA8, PNN, SCML2, TAF1D, LIN28A, NCOR1, ZFP292, EWSR1, FUBP1, SUPT5, TAF5, TRP53BP1, MPHOSPH8, SRSF10, BPTF	110	2279	18082	1.73109	0.996323	0.696844	0.696844
Jund	1.10601e-07	0.531395	0.956	0.831	0.00257811		GOTERM_BP_DIRECT	GO:0006351~transcription, DNA-templated	21	17.2131	0.00849698	CREBBP, MYEF2, JUND, FIGLA, MCRS1, EDF1, FOXO1, NR2F6, FOXP1, STRA8, PNN, TAF1D, NCOR1, ZFP292, EWSR1, FUBP1, SUPT5, TAF5, TRP53BP1, MPHOSPH8, BPTF	110	1885	18082	1.83131	0.996326	0.696844	0.696844
Hist1h2bj	1.3811e-07	0.411211	0.458	0.146	0.00321935		GOTERM_BP_DIRECT	GO:0015031~protein transport	10	8.19672	0.0095458	DNAJC19, BCAP31, EHD1, SEC61A1, CENPF, EXOC7, RRBP1, SEC62, CNIH4, PPID	110	592	18082	2.77672	0.998167	0.696844	0.696844
Sycp3	5.77538e-07	0.419132	0.945	0.82	0.0134624		GOTERM_BP_DIRECT	GO:0061077~chaperone-mediated protein folding	3	2.45902	0.0158745	CALR, PPIB, PPID	110	32	18082	15.4108	0.999973	0.996265	0.996265
mt-Atp6	6.07402e-07	0.593255	1	0.966	0.0141585		GOTERM_BP_DIRECT	GO:0045944~positive regulation of transcription from RNA polymerase II promoter	13	10.6557	0.0166802	TOP2A, CREBBP, JUND, FIGLA, CKAP2, FOXO1, FOXP1, STRA8, ZFP292, EPCAM, SUPT5, TRP53BP1, HRAS	110	995	18082	2.1477	0.999984	0.996265	0.996265
Ppib	7.7042e-07	0.443837	0.938	0.764	0.0179585		GOTERM_BP_DIRECT	GO:0051321~meiotic cell cycle	4	3.27869	0.0197588	TDRD1, STRA8, RAD50, SYCP3	110	95	18082	6.92134	0.999998	1	1
mt-Nd3	1.55853e-06	0.591723	0.857	0.674	0.0363294		GOTERM_BP_DIRECT	GO:0055007~cardiac muscle cell differentiation	3	2.45902	0.0209043	AKAP13, CALR, FOXP1	110	37	18082	13.3283	0.999999	1	1
Cdc16	2.80442e-06	0.32072	0.542	0.247	0.065371		GOTERM_BP_DIRECT	GO:0007066~female meiosis sister chromatid cohesion	2	1.63934	0.0238972	STRA8, SYCP3	110	4	18082	82.1909	1	1	1
D10Wsu102e	3.79532e-06	0.397486	0.938	0.843	0.0884689		GOTERM_BP_DIRECT	GO:0006334~nucleosome assembly	4	3.27869	0.0250099	HIST1H2BJ, HIST1H1E, HIST1H4D, HIST1H1B	110	104	18082	6.32238	1	1	1
Figla	3.93732e-06	0.35402	0.366	0.112	0.091779		GOTERM_BP_DIRECT	GO:0007067~mitotic nuclear division	6	4.91803	0.0262212	ZFP830, CDC16, BUB1B, KNL1, SYCP3, KIF20B	110	277	18082	3.56062	1	1	1
Mphosph8	3.9833e-06	0.346343	0.982	0.888	0.0928506		GOTERM_BP_DIRECT	GO:0006357~regulation of transcription from RNA polymerase II promoter	7	5.7377	0.0330838	NCOR1, JUND, SUPT5, FUBP1, HIST1H1E, ECSIT, FOXO1	110	397	18082	2.89842	1	1	1
mt-Co2	4.66013e-06	0.579168	0.971	0.944	0.108628		GOTERM_BP_DIRECT	GO:0031047~gene silencing by RNA	3	2.45902	0.0406521	TDRD1, TDRKH, LIN28A	110	53	18082	9.30463	1	1	1
Bcap31	5.08042e-06	0.381972	0.736	0.494	0.118424		GOTERM_BP_DIRECT	GO:0006620~posttranslational protein targeting to membrane	2	1.63934	0.0414479	SEC61A1, SEC62	110	7	18082	46.9662	1	1	1
Eif5b	1.33835e-05	0.301636	0.978	0.989	0.31197		GOTERM_BP_DIRECT	GO:0006457~protein folding	4	3.27869	0.0423145	P4HB, CALR, PPIB, PPID	110	128	18082	5.13693	1	1	1
Sec61a1	2.16135e-05	0.369209	0.67	0.393	0.503811		GOTERM_BP_DIRECT	GO:0051168~nuclear export	2	1.63934	0.0472284	AKAP13, HNRNPA1	110	8	18082	41.0955	1	1	1
mt-Nd4l	2.17711e-05	0.435378	0.762	0.607	0.507483		GOTERM_BP_DIRECT	GO:0034063~stress granule assembly	2	1.63934	0.058686	DYNC1H1, PUM2	110	10	18082	32.8764	1	1	1
Rnaseh2c	2.31812e-05	0.392987	0.784	0.584	0.540353		GOTERM_BP_DIRECT	GO:0034501~protein localization to kinetochore	2	1.63934	0.058686	BUB1B, KNL1	110	10	18082	32.8764	1	1	1
mt-Atp8	3.00649e-05	0.375708	0.751	0.528	0.700812		GOTERM_BP_DIRECT	GO:0070201~regulation of establishment of protein localization	2	1.63934	0.0643634	CENPF, KIF20B	110	11	18082	29.8876	1	1	1
Hnrnpa1	3.0772e-05	0.271557	0.993	1	0.717294		GOTERM_BP_DIRECT	GO:0051301~cell division	6	4.91803	0.0758597	ZFP830, CDC16, BUB1B, KNL1, SYCP3, KIF20B	110	374	18082	2.63714	1	1	1
Knl1	3.15829e-05	0.381273	0.531	0.281	0.736197		GOTERM_BP_DIRECT	GO:0050679~positive regulation of epithelial cell proliferation	3	2.45902	0.0769732	ESRP1, HRAS, FOXP1	110	76	18082	6.48876	1	1	1
Clpb	3.40677e-05	0.321664	0.667	0.393	0.794118		GOTERM_BP_DIRECT	GO:0043984~histone H4-K16 acetylation	2	1.63934	0.0811931	MCRS1, HCFC1	110	14	18082	23.4831	1	1	1
Akap9	3.60644e-05	0.464414	0.634	0.382	0.840662		GOTERM_BP_DIRECT	GO:0007050~cell cycle arrest	3	2.45902	0.0858545	CALR, HRAS, PPM1G	110	81	18082	6.08822	1	1	1
Dnajc19	3.80163e-05	0.405371	0.802	0.618	0.886159		GOTERM_BP_DIRECT	GO:0043982~histone H4-K8 acetylation	2	1.63934	0.0922458	MCRS1, HCFC1	110	16	18082	20.5477	1	1	1
Trp53bp1	3.87743e-05	0.353505	0.582	0.348	0.903829		GOTERM_BP_DIRECT	GO:0043981~histone H4-K5 acetylation	2	1.63934	0.0922458	MCRS1, HCFC1	110	16	18082	20.5477	1	1	1
Hist1h4d	3.94802e-05	0.330456	0.524	0.292	0.920282		GOTERM_BP_DIRECT	GO:0000380~alternative mRNA splicing, via spliceosome	2	1.63934	0.0922458	ESRP1, HNRNPA1	110	16	18082	20.5477	1	1	1
mt-Nd4	5.32427e-05	0.498408	0.912	0.764	1		GOTERM_BP_DIRECT	GO:0010628~positive regulation of gene expression	6	4.91803	0.0936627	CREBBP, ROCK2, FUBP1, CALR, HRAS, HCFC1	110	399	18082	2.47191	1	1	1
Rapgef6	5.82481e-05	0.317757	0.604	0.36	1		GOTERM_BP_DIRECT	GO:0008299~isoprenoid biosynthetic process	2	1.63934	0.0977227	FDPS, HMGCR	110	17	18082	19.339	1	1	1
Pum2	6.24162e-05	0.365647	0.568	0.348	1
Siva1	6.38794e-05	0.315253	0.985	0.933	1
Zc3h13	6.46222e-05	0.343799	0.813	0.584	1
Ndufa11	7.38416e-05	0.291568	0.996	0.955	1
Plekha1	8.31869e-05	0.313712	0.498	0.27	1
Pold1	9.35382e-05	0.362706	0.692	0.472	1
mt-Co3	0.000100688	0.50231	0.978	0.966	1
Ewsr1	0.000102709	0.318464	0.894	0.764	1
Lin28a	0.000123282	0.312414	0.531	0.27	1
Pnn	0.000145505	0.348872	0.949	0.865	1
Scml2	0.000152554	0.329416	0.864	0.753	1
Top2a	0.000156075	0.284135	0.974	0.888	1
Wdr18	0.000156958	0.365315	0.853	0.73	1
Hmgcr	0.000163636	0.325075	0.667	0.393	1
Ndufv3	0.000164269	0.361059	0.839	0.685	1
Larp1b	0.000172497	0.364746	0.714	0.551	1
Ankrd31	0.000172874	0.28691	0.447	0.225	1
C1qtnf4	0.000208278	0.292454	0.846	0.584	1
Exoc7	0.000247445	0.286732	0.355	0.169	1
Slc4a1ap	0.000252923	0.30095	0.641	0.461	1
Tdrd1	0.000281975	0.299692	0.685	0.472	1
Cyc1	0.00029933	0.301707	0.919	0.809	1
Cdca4	0.000348368	0.29837	0.575	0.382	1
mt-Nd1	0.000350614	0.481458	0.901	0.787	1
Bub1b	0.000364373	0.269707	0.751	0.539	1
mt-Nd2	0.000379391	0.407945	0.919	0.809	1
Herc1	0.000387242	0.311312	0.696	0.528	1
Sec62	0.000389839	0.279883	0.879	0.775	1
Dst	0.000393309	0.261936	0.48	0.27	1
Hras	0.000396408	0.323313	0.853	0.663	1
Pmm1	0.00042543	0.307084	0.773	0.562	1
Tex10	0.000434852	0.324733	0.788	0.674	1
Cbll1	0.000444114	0.290509	0.52	0.315	1
Brd1	0.000457786	0.266285	0.766	0.573	1
Cdk12	0.000508011	0.295664	0.835	0.629	1
Ankrd12	0.000528168	0.326018	0.806	0.629	1
Gm42418	0.000552711	0.275282	1	1	1
Akap13	0.000583566	0.266988	0.604	0.371	1
Upf2	0.000643727	0.316461	0.652	0.449	1
Slc39a6	0.000681141	0.290421	0.473	0.292	1
Hist1h1e	0.000682271	0.379166	0.505	0.303	1
Mrpl51	0.000686987	0.281994	0.894	0.764	1
Ecsit	0.000746524	0.271207	0.564	0.337	1
Cnih4	0.000749347	0.257598	0.846	0.629	1
Cep83	0.000792631	0.26722	0.678	0.472	1
Ndufa6	0.000819979	0.286016	0.883	0.742	1
Kif20b	0.000847117	0.255597	0.711	0.517	1
Zfp830	0.000864183	0.269925	0.52	0.337	1
Esrp1	0.000868516	0.28149	0.418	0.236	1
Ccdc18	0.000900862	0.254278	0.374	0.191	1
Ddx50	0.000928342	0.30412	0.791	0.607	1
Nosip	0.000941536	0.278229	0.524	0.315	1
Gm49756	0.000946141	0.441649	0.297	0.124	1
Sbk1	0.00101492	0.25647	0.421	0.247	1
Dync1h1	0.00103005	0.275633	0.78	0.596	1
Nr2f6	0.00104838	0.280701	0.524	0.337	1
Foxp1	0.00105617	0.256188	0.641	0.483	1
Rad50	0.00108777	0.293735	0.89	0.753	1
Tdrkh	0.00113198	0.298696	0.85	0.719	1
mt-Cytb	0.00120916	0.334908	0.93	0.865	1
Taf5	0.00129179	0.290412	0.685	0.494	1
Prpf38b	0.00136211	0.345833	0.795	0.697	1
Arl6ip1	0.0015479	0.335917	0.842	0.753	1
Ftsj3	0.00176448	0.278586	0.81	0.618	1
Topaz1	0.00176562	0.28274	0.678	0.483	1
Foxo1	0.00185036	0.271962	0.641	0.461	1
Fubp1	0.00188128	0.251107	0.945	0.82	1
Myef2	0.00189595	0.264185	0.674	0.506	1
Gemin5	0.00192907	0.255884	0.623	0.416	1
Ncapg	0.00201957	0.290666	0.516	0.348	1
Hcfc1	0.00217815	0.295507	0.634	0.472	1
Supt5	0.002241	0.265859	0.894	0.809	1
P4hb	0.00224275	0.273339	0.853	0.663	1
Ncor1	0.00226469	0.287727	0.74	0.584	1
Hist1h1b	0.00241963	0.305938	0.282	0.124	1
Crebbp	0.00250273	0.250435	0.813	0.64	1
Atp6v1d	0.00285229	0.279282	0.564	0.427	1
D030056L22Rik	0.00307826	0.296731	0.894	0.73	1
Bptf	0.00309664	0.30055	0.806	0.596	1
Zfp292	0.00311217	0.256178	0.714	0.528	1
Btbd7	0.00311714	0.250184	0.645	0.494	1
Calr	0.00328179	0.294265	0.879	0.798	1
Rrbp1	0.00371917	0.292267	0.733	0.562	1
Golgb1	0.00387942	0.284895	0.711	0.562	1
Mcrs1	0.0038831	0.267755	0.7	0.517	1
Sf3b3	0.00392327	0.255867	0.784	0.64	1
Hist1h2ae	0.00393083	0.331787	0.52	0.337	1
Tfrc	0.00393376	0.258479	0.604	0.438	1
Mcm3	0.00395683	0.307241	0.853	0.764	1
Ckap2	0.0041255	0.270737	0.681	0.517	1
Acsl3	0.00415597	0.290426	0.656	0.483	1
Rock2	0.00416413	0.264276	0.791	0.618	1
Stra8	0.00420739	0.430837	0.795	0.719	1
Epcam	0.00428945	0.255593	0.78	0.618	1
Ppm1g	0.00517441	0.250438	0.806	0.652	1
Ehd1	0.00547912	0.262715	0.784	0.629	1
Ndufb1-ps	0.00555736	0.258871	0.927	0.82	1
Cenpf	0.00616221	0.268306	0.945	0.944	1
4932438A13Rik	0.00651949	0.265311	0.612	0.438	1
Pdcd11	0.0073809	0.261928	0.927	0.854	1
Ubn2	0.00863942	0.251081	0.597	0.427	1
Fdps	0.00898256	0.26198	0.945	0.876	1
Ubn1	0.00910205	0.253834	0.802	0.64	1
Glg1	0.00971306	0.276038	0.681	0.494	1

## Sheet: Fig6-S2CD-2
DSPG1 up-regulated gene							GO
	p_val	avg_log2FC	pct.1	pct.2	p_val_adj		Category	Term	Count	%	PValue	Genes	List Total	Pop Hits	Pop Total	Fold Enrichment	Bonferroni	Benjamini	FDR
Ftl1	1.14153e-07	-0.339756	1	1	0.00266091		GOTERM_BP_DIRECT	GO:0006383~transcription from RNA polymerase III promoter	3	4.28571	0.00178547	POLR3D, POLR1D, POLR2H	61	19	18082	46.8041	0.470698	0.635628	0.635628
Sumo2	1.59883e-07	-0.336547	1	1	0.00372688		GOTERM_BP_DIRECT	GO:0006879~cellular iron ion homeostasis	3	4.28571	0.00978094	FTL1, FTH1, HMOX1	61	45	18082	19.7617	0.969777	1	1
H2afz	5.4805e-07	-0.29943	0.993	0.989	0.012775		GOTERM_BP_DIRECT	GO:0006979~response to oxidative stress	4	5.71429	0.0098101	PRDX1, TXNRD1, HMOX1, GCLM	61	133	18082	8.91507	0.970092	1	1
Ywhae	9.2938e-07	-0.329948	0.996	1	0.0216639		GOTERM_BP_DIRECT	GO:0006397~mRNA processing	5	7.14286	0.0220525	SLBP, HNRNPK, FRG1, MAGOHB, LSM4	61	322	18082	4.60289	0.999643	1	1
Fth1	2.25277e-06	-0.316666	1	1	0.0525122		GOTERM_BP_DIRECT	GO:0042254~ribosome biogenesis	3	4.28571	0.0352606	ZNHIT6, FRG1, GAR1	61	89	18082	9.9919	0.999997	1	1
Rps12	2.63702e-06	-0.305032	1	1	0.061469		GOTERM_BP_DIRECT	GO:0006880~intracellular sequestering of iron ion	2	2.85714	0.0359106	FTL1, FTH1	61	11	18082	53.8957	0.999998	1	1
Chic2	3.28843e-06	-0.334486	0.916	0.978	0.0766533		GOTERM_BP_DIRECT	GO:0034101~erythrocyte homeostasis	2	2.85714	0.0359106	PRDX1, HMOX1	61	11	18082	53.8957	0.999998	1	1
Fis1	1.17726e-05	-0.332257	0.883	0.91	0.27442		GOTERM_BP_DIRECT	GO:0033962~cytoplasmic mRNA processing body assembly	2	2.85714	0.0391116	CNOT7, LSM4	61	12	18082	49.4044	0.999999	1	1
Pabpc4	1.61564e-05	-0.420848	0.414	0.584	0.376605		GOTERM_BP_DIRECT	GO:0042744~hydrogen peroxide catabolic process	2	2.85714	0.0454823	PRDX1, TXNRD1	61	14	18082	42.3466	1	1	1
Prdx1	1.78551e-05	-0.281646	1	1	0.416202		GOTERM_BP_DIRECT	GO:0008380~RNA splicing	4	5.71429	0.045931	HNRNPK, FRG1, MAGOHB, LSM4	61	241	18082	4.91994	1	1	1
Capza2	2.77671e-05	-0.42406	0.813	0.876	0.647252		GOTERM_BP_DIRECT	GO:0006626~protein targeting to mitochondrion	2	2.85714	0.0705523	FIS1, TOMM5	61	22	18082	26.9478	1	1	1
Gm10076	2.7987e-05	-0.307071	0.993	1	0.652378		GOTERM_BP_DIRECT	GO:0006826~iron ion transport	2	2.85714	0.0767179	FTL1, FTH1	61	24	18082	24.7022	1	1	1
Pnoc	3.98505e-05	-0.252077	0.048	0.18	0.928915		GOTERM_BP_DIRECT	GO:0060999~positive regulation of dendritic spine development	2	2.85714	0.0919566	HNRNPK, LLPH	61	29	18082	20.4432	1	1	1
Rab2a	4.53135e-05	-0.380751	0.853	0.888	1
Cmss1	6.85724e-05	-0.382858	0.681	0.764	1
Ak6	7.35056e-05	-0.429278	0.703	0.798	1
Dtymk	0.000105945	-0.460805	0.678	0.775	1
Gar1	0.000125387	-0.377304	0.835	0.876	1
Lsm4	0.000202649	-0.254982	0.982	0.989	1
Dlk1	0.000229344	-0.325489	0.465	0.629	1
Frg1	0.000263514	-0.339791	0.853	0.888	1
Txnrd1	0.00036214	-0.433211	0.729	0.775	1
Mtch1	0.000382587	-0.399405	0.593	0.73	1
Dcun1d5	0.000382962	-0.348299	0.828	0.843	1
Mrfap1	0.00043342	-0.306844	0.945	0.944	1
Gclm	0.000489061	-0.413263	0.886	0.888	1
Dcaf4	0.000627322	-0.320886	0.546	0.685	1
Cnot7	0.000673623	-0.359878	0.641	0.742	1
Hmox1	0.000784202	-0.360462	0.667	0.753	1
Scpep1	0.000921636	-0.259478	0.212	0.36	1
Gm47283	0.000999982	-0.55742	0.608	0.64	1
Ccdc25	0.00104773	-0.308255	0.791	0.865	1
Sinhcaf	0.00116212	-0.361958	0.766	0.82	1
Eno1	0.00120676	-0.443383	0.846	0.876	1
Smim8	0.00154467	-0.304889	0.293	0.438	1
Erh	0.00164754	-0.283356	0.916	0.921	1
Polr3d	0.00180046	-0.294409	0.766	0.831	1
Cisd1	0.00195096	-0.385435	0.733	0.775	1
Znhit6	0.00197649	-0.319442	0.799	0.854	1
Wdfy1	0.00197745	-0.254205	0.212	0.36	1
Dab1	0.00208617	-0.302694	0.19	0.326	1
Ak2	0.00238967	-0.275775	0.722	0.787	1
Ube2q1	0.00264534	-0.28132	0.667	0.719	1
Myl6	0.00268508	-0.37749	0.828	0.854	1
Rps4x	0.00270207	-0.317529	0.941	0.955	1
Rbbp7	0.00275861	-0.366377	0.879	0.876	1
Zfp936	0.00293183	-0.329271	0.322	0.461	1
Polr2h	0.00307406	-0.284047	0.864	0.854	1
Gsta3	0.00310339	-0.281515	0.289	0.427	1
Ciao2a	0.0035389	-0.38148	0.451	0.539	1
Hikeshi	0.00390289	-0.424459	0.663	0.719	1
Magohb	0.0039448	-0.309783	0.626	0.708	1
Nrbp1	0.00415491	-0.273932	0.864	0.888	1
Hnrnpk	0.00432941	-0.261776	0.993	0.966	1
Mrpl41	0.00469259	-0.312159	0.722	0.82	1
Polr1d	0.0051598	-0.321349	0.868	0.899	1
Bex4	0.00622194	-0.254491	0.853	0.865	1
Fgfr1op2	0.0064682	-0.373151	0.747	0.764	1
Unc119	0.00646898	-0.29932	0.615	0.674	1
Tomm5	0.00647153	-0.253824	0.451	0.607	1
Med10	0.00647369	-0.273808	0.861	0.854	1
Tex19.1	0.00665897	-0.262598	0.934	0.955	1
Slbp	0.00673493	-0.30036	0.919	0.933	1
Llph	0.0074105	-0.342933	0.905	0.944	1
Rbm46	0.00783554	-0.282571	0.864	0.876	1
Dut	0.00794106	-0.272534	0.934	0.944	1
Cdk9	0.00810803	-0.279348	0.747	0.809	1
Bin1	0.00815309	-0.288279	0.498	0.629	1
Tmem80	0.008248	-0.730109	0.385	0.494	1
Olfr1423	0.00887668	-0.9446	0.11	0.213	1
Uchl5	0.00954525	-0.290341	0.674	0.73	1
Sar1a	0.00964739	-0.269061	0.916	0.966	1
1500009L16Rik	0.00977521	-0.306826	0.469	0.573	1

## Sheet: Fig6-S2EF-1
DSPG2 down-regulated gene							GO
	p_val	avg_log2FC	pct.1	pct.2	p_val_adj		Category	Term	Count	%	PValue	Genes	List Total	Pop Hits	Pop Total	Fold Enrichment	Bonferroni	Benjamini	FDR
Srsf10	7.39088e-47	1.21417	0.955	0.577	1.72281e-42		GOTERM_BP_DIRECT	GO:0006397~mRNA processing	19	9.26829	8.27209e-09	SRRM2, PRPF38B, RBM25, SF3B3, CPSF1, YTHDC1, SUPT6, IWS1, SRPK1, HNRNPL, PNN, ALKBH5, PDCD11, U2AF2, RBBP6, CDK12, PABPC1, HNRNPA1, SRSF10	190	322	18082	5.61553	8.47058e-06	8.47062e-06	8.43753e-06
mt-Atp8	5.41325e-18	0.721343	0.812	0.455	1.26183e-13		GOTERM_BP_DIRECT	GO:0008380~RNA splicing	14	6.82927	1.5733e-06	SRRM2, PRPF38B, RBM25, SF3B3, YTHDC1, SUPT6, IWS1, SRPK1, PNN, U2AF2, CDK12, PABPC1, HNRNPA1, SRSF10	190	241	18082	5.52846	0.00160977	0.000805531	0.000802385
Rcc2	3.4122e-15	0.520104	0.98	0.801	7.95383e-11		GOTERM_BP_DIRECT	GO:0006351~transcription, DNA-templated	37	18.0488	0.000256701	KMT2A, HDAC1, MYCBP2, CHD6, CHD4, IWS1, HDAC6, CCAR1, SOX3, PNN, PURA, STRA8, BCLAF1, CCDC85B, SIN3A, NUP62, ASCC3, GTF2I, BRD3, SPEN, CREBBP, JUND, PRMT7, MGA, CSNK2A2, SUPT6, EDF1, BAZ1B, FOXP1, EID2, NR6A1, GON4L, EWSR1, FUBP1, BRWD1, MPHOSPH8, MXD4	190	1885	18082	1.86803	0.231178	0.0876205	0.0872782
Mphosph8	2.80176e-13	0.49881	0.944	0.801	6.53089e-09		GOTERM_BP_DIRECT	GO:0006355~regulation of transcription, DNA-templated	40	19.5122	0.00120497	KMT2A, HDAC1, MYCBP2, USP34, CHD6, CHD4, IWS1, HDAC6, CCAR1, SOX3, PNN, PURA, STRA8, BCLAF1, CCDC85B, SIN3A, ASCC3, SRSF10, GTF2I, BRD3, SPEN, CREBBP, JUND, PRMT7, MGA, CSNK2A2, SUPT6, EDF1, BAZ1B, FOXP1, EID2, NR6A1, GON4L, EWSR1, CSDE1, FUBP1, BRWD1, MPHOSPH8, NFE2L1, MXD4	190	2279	18082	1.67035	0.709059	0.29443	0.293279
Mrpl54	4.00845e-13	0.524768	0.897	0.699	9.34369e-09		GOTERM_BP_DIRECT	GO:0045070~positive regulation of viral genome replication	4	1.95122	0.00170624	TOP2A, PABPC1, PPID, SRPK1	190	23	18082	16.551	0.825996	0.29443	0.293279
Gm42418	4.7471e-13	0.504982	1	0.981	1.10655e-08		GOTERM_BP_DIRECT	GO:0006260~DNA replication	7	3.41463	0.00186263	STRA8, CCDC88A, SIN3A, MCMBP, MCM5, RBBP6, MCM6	190	123	18082	5.41609	0.851787	0.29443	0.293279
Hnrnpa0	9.32168e-13	0.462388	0.971	0.737	2.17288e-08		GOTERM_BP_DIRECT	GO:0006457~protein folding	7	3.41463	0.00227778	RANBP2, PDIA3, CANX, P4HB, PPIB, PPID, HSP90B1	190	128	18082	5.20452	0.9032	0.29443	0.293279
Edf1	7.81979e-12	0.412466	0.957	0.827	1.82279e-07		GOTERM_BP_DIRECT	GO:0051028~mRNA transport	6	2.92683	0.00230023	RANBP2, XPO1, NUP62, SUPT6, HNRNPA1, IWS1	190	88	18082	6.48876	0.905405	0.29443	0.293279
Dynll2	1.90286e-11	0.385897	0.996	0.929	4.43557e-07		GOTERM_BP_DIRECT	GO:0030154~cell differentiation	18	8.78049	0.00343548	PRMT7, CADM1, GADD45B, METRN, STRBP, EDF1, MEA1, SRPK1, ENAH, STRA8, PURA, ALKBH5, EID2, NR6A1, KIF2A, CCDC85B, KIT, JAK1	190	780	18082	2.19619	0.970518	0.353432	0.352051
Slk	2.31253e-11	0.474011	0.79	0.474	5.3905e-07		GOTERM_BP_DIRECT	GO:0050684~regulation of mRNA processing	3	1.46341	0.00372796	SUPT6, IWS1, SRPK1	190	9	18082	31.7228	0.978172	0.353432	0.352051
Ppid	3.94535e-11	0.461459	0.799	0.513	9.19661e-07		GOTERM_BP_DIRECT	GO:0007283~spermatogenesis	12	5.85366	0.00379663	STRA8, ALKBH5, NR6A1, CADM1, STRBP, NUP62, AKAP9, KIT, SYCP3, MEA1, 4932438A13RIK, SOD1	190	407	18082	2.80595	0.97966	0.353432	0.352051
Larp1b	4.31351e-11	0.468045	0.745	0.455	1.00548e-06		GOTERM_BP_DIRECT	GO:0006268~DNA unwinding involved in DNA replication	3	1.46341	0.004628	TOP2A, PURA, MCM6	190	10	18082	28.5505	0.991349	0.394923	0.39338
Sppl3	6.24035e-11	0.365288	0.494	0.218	1.45463e-06		GOTERM_BP_DIRECT	GO:0007049~cell cycle	15	7.31707	0.0052544	RIF1, RCC2, CSNK2A2, HJURP, BUB1B, TEX14, CCAR1, ANLN, RAD50, CDC34, KIF2A, MCMBP, MCM5, SYCP3, MCM6	190	614	18082	2.32496	0.995459	0.413885	0.412268
Tnrc6c	8.17391e-11	0.425677	0.859	0.609	1.90534e-06		GOTERM_BP_DIRECT	GO:0000398~mRNA splicing, via spliceosome	6	2.92683	0.00644803	SPEN, SF3B3, U2AF2, YTHDC1, TXNL4A, SRSF10	190	112	18082	5.09831	0.998672	0.449463	0.447707
Nmt2	1.03057e-10	0.356026	0.998	0.942	2.40227e-06		GOTERM_BP_DIRECT	GO:0006476~protein deacetylation	3	1.46341	0.00669511	SIN3A, HDAC1, HDAC6	190	12	18082	23.7921	0.998971	0.449463	0.447707
Kit	1.15162e-10	0.444891	0.77	0.468	2.68443e-06		GOTERM_BP_DIRECT	GO:0016569~covalent chromatin modification	9	4.39024	0.00702286	BRD3, PRMT7, KMT2A, KANSL1, HDAC1, SMARCA5, CHD6, CHD4, HDAC6	190	266	18082	3.21998	0.999266	0.449463	0.447707
Vcp	1.19848e-10	0.390475	0.944	0.865	2.79366e-06		GOTERM_BP_DIRECT	GO:0007067~mitotic nuclear division	9	4.39024	0.00882064	ANLN, KIF2A, RCC2, NUP62, MCMBP, BUB1B, TEX14, SYCP3, TXNL4A	190	277	18082	3.09211	0.999885	0.502537	0.500574
Rbm25	2.64756e-10	0.424594	0.946	0.795	6.17146e-06		GOTERM_BP_DIRECT	GO:0043065~positive regulation of apoptotic process	10	4.87805	0.00883367	EGLN1, TOP2A, ALDH1A3, USP7, BCLAF1, SLK, GADD45B, PTPRF, PPID, CCAR1	190	335	18082	2.84085	0.999887	0.502537	0.500574
Ckap4	2.74432e-10	0.408175	0.617	0.333	6.39702e-06		GOTERM_BP_DIRECT	GO:0048511~rhythmic process	6	2.92683	0.0111353	TOP2A, CREBBP, KMT2A, SIN3A, ROCK2, HDAC1	190	128	18082	4.46102	0.99999	0.600135	0.597791
Mxd4	4.47887e-10	0.397856	0.678	0.417	1.04402e-05		GOTERM_BP_DIRECT	GO:0051571~positive regulation of histone H3-K4 methylation	3	1.46341	0.0118438	KMT2A, AUTS2, DNMT3B	190	16	18082	17.8441	0.999995	0.606402	0.604034
Hnrnpa1	5.54677e-10	0.366036	0.989	0.91	1.29295e-05		GOTERM_BP_DIRECT	GO:0006974~cellular response to DNA damage stimulus	11	5.36585	0.0131031	TOP2A, RAD50, USP7, VCP, RIF1, UBA1, RBBP6, ZSWIM7, ASCC3, BAZ1B, UNG	190	420	18082	2.49251	0.999999	0.620521	0.618097
Rock2	6.09741e-10	0.453963	0.801	0.551	1.42131e-05		GOTERM_BP_DIRECT	GO:0006349~regulation of gene expression by genetic imprinting	3	1.46341	0.0133315	PRMT7, KCNQ1OT1, DNMT3B	190	17	18082	16.7944	0.999999	0.620521	0.618097
Ewsr1	6.90999e-10	0.447862	0.872	0.673	1.61072e-05		GOTERM_BP_DIRECT	GO:0007059~chromosome segregation	5	2.43902	0.0141715	TOP2A, CENPF, HJURP, CEP85, SRPK1	190	89	18082	5.34654	1	0.630938	0.628474
AC149090.1	1.74322e-09	0.371089	0.604	0.333	4.06346e-05		GOTERM_BP_DIRECT	GO:0000413~protein peptidyl-prolyl isomerization	3	1.46341	0.0182474	RANBP2, PPIB, PPID	190	20	18082	14.2753	1	0.70984	0.707067
Fubp1	1.83391e-09	0.384448	0.888	0.673	4.27485e-05		GOTERM_BP_DIRECT	GO:0060324~face development	3	1.46341	0.0182474	SOX3, ALDH1A3, MAP2K2	190	20	18082	14.2753	1	0.70984	0.707067
Nisch	2.07202e-09	0.359191	0.79	0.564	4.82987e-05		GOTERM_BP_DIRECT	GO:0045892~negative regulation of transcription, DNA-templated	13	6.34146	0.018861	SPEN, HDAC1, FOXP1, PURA, CENPF, BCLAF1, EID2, GON4L, CCDC85B, SIN3A, DNMT3B, MPHOSPH8, MXD4	190	579	18082	2.13677	1	0.70984	0.707067
Egln1	2.31827e-09	0.385742	0.667	0.378	5.40388e-05		GOTERM_BP_DIRECT	GO:0000183~chromatin silencing at rDNA	4	1.95122	0.0198126	SIN3A, HDAC1, SMARCA5, DNMT3B	190	55	18082	6.92134	1	0.70984	0.707067
mt-Nd5	2.57321e-09	0.504223	0.828	0.622	5.99816e-05		GOTERM_BP_DIRECT	GO:0035162~embryonic hemopoiesis	3	1.46341	0.0200312	TNRC6C, KMT2A, KIT	190	21	18082	13.5955	1	0.70984	0.707067
Pdcd11	3.07924e-09	0.428412	0.87	0.635	7.17771e-05		GOTERM_BP_DIRECT	GO:0097332~response to antipsychotic drug	2	0.97561	0.0207961	PRKAR2B, SOD1	190	2	18082	95.1684	1	0.70984	0.707067
Rad50	3.20447e-09	0.458572	0.805	0.609	7.46961e-05		GOTERM_BP_DIRECT	GO:0018008~N-terminal peptidyl-glycine N-myristoylation	2	0.97561	0.0207961	NMT1, NMT2	190	2	18082	95.1684	1	0.70984	0.707067
Ppp2r5c	3.20981e-09	0.395513	0.694	0.397	7.48207e-05		GOTERM_BP_DIRECT	GO:0048025~negative regulation of mRNA splicing, via spliceosome	3	1.46341	0.0278481	HNRNPL, U2AF2, SRSF10	190	25	18082	11.4202	1	0.876189	0.872766
Ptprf	4.17764e-09	0.41829	0.743	0.449	9.73808e-05		GOTERM_BP_DIRECT	GO:0043044~ATP-dependent chromatin remodeling	3	1.46341	0.0278481	HDAC1, SMARCA5, CHD4	190	25	18082	11.4202	1	0.876189	0.872766
Tbl3	5.54913e-09	0.331127	0.714	0.442	0.00012935		GOTERM_BP_DIRECT	GO:0006302~double-strand break repair	4	1.95122	0.0282366	RAD50, VCP, SMARCA5, BAZ1B	190	63	18082	6.04244	1	0.876189	0.872766
Ascc3	7.80345e-09	0.32617	0.615	0.346	0.000181898		GOTERM_BP_DIRECT	GO:0016575~histone deacetylation	3	1.46341	0.03668	SIN3A, HDAC1, HDAC6	190	29	18082	9.84501	1	1	0.997067
Mex3d	9.92938e-09	0.338267	0.651	0.365	0.000231454		GOTERM_BP_DIRECT	GO:0006915~apoptotic process	12	5.85366	0.0375097	NISCH, PURA, BCLAF1, RBM25, SLK, GADD45B, CADM1, SIVA1, CSNK2A2, BUB1B, PPID, CCAR1	190	570	18082	2.00355	1	1	0.997067
Letm1	1.02131e-08	0.336951	0.485	0.231	0.000238068		GOTERM_BP_DIRECT	GO:0006499~N-terminal protein myristoylation	2	0.97561	0.0411619	NMT1, NMT2	190	4	18082	47.5842	1	1	0.997067
Eva1b	1.30248e-08	0.360462	0.582	0.327	0.000303607		GOTERM_BP_DIRECT	GO:0007066~female meiosis sister chromatid cohesion	2	0.97561	0.0411619	STRA8, SYCP3	190	4	18082	47.5842	1	1	0.997067
Foxp1	1.42095e-08	0.320374	0.577	0.314	0.000331224		GOTERM_BP_DIRECT	GO:0046677~response to antibiotic	3	1.46341	0.0414464	PPP2CB, JAK1, SOD1	190	31	18082	9.20985	1	1	0.997067
Herc1	1.52846e-08	0.434662	0.723	0.5	0.000356283		GOTERM_BP_DIRECT	GO:0051301~cell division	9	4.39024	0.0434193	ANLN, KIF2A, RCC2, MCMBP, BUB1B, MCM5, TEX14, SYCP3, TXNL4A	190	374	18082	2.29015	1	1	0.997067
Pabpc1	1.54562e-08	0.325177	0.987	0.949	0.000360284		GOTERM_BP_DIRECT	GO:0061077~chaperone-mediated protein folding	3	1.46341	0.0439121	CANX, PPIB, PPID	190	32	18082	8.92204	1	1	0.997067
Ptcra	1.58209e-08	0.78719	0.468	0.199	0.000368784		GOTERM_BP_DIRECT	GO:0034976~response to endoplasmic reticulum stress	4	1.95122	0.0453516	PDIA3, PPP2CB, HYOU1, P4HB	190	76	18082	5.00886	1	1	0.997067
Ddhd1	1.8353e-08	0.3417	0.586	0.333	0.000427808		GOTERM_BP_DIRECT	GO:0006446~regulation of translational initiation	3	1.46341	0.046431	EIF5B, EIF3A, EIF4G1	190	33	18082	8.65167	1	1	0.997067
Hnrnpl	2.08777e-08	0.32501	0.74	0.468	0.000486659		GOTERM_BP_DIRECT	GO:0015031~protein transport	12	5.85366	0.0470297	RANBP2, UNC119B, SEC61A1, CENPF, TMED9, XPO1, CSE1L, NUP62, VPS13A, PPID, TMED5, EXOC1	190	592	18082	1.92909	1	1	0.997067
Mdn1	2.61851e-08	0.456259	0.852	0.615	0.000610375		GOTERM_BP_DIRECT	GO:0001975~response to amphetamine	3	1.46341	0.0490017	RANBP2, HDAC1, SOD1	190	34	18082	8.39721	1	1	0.997067
Cyhr1	3.01822e-08	0.366507	0.669	0.423	0.000703548		GOTERM_BP_DIRECT	GO:0009790~embryo development	4	1.95122	0.0498872	APLP2, SMARCA5, GTF2I, FOXP1	190	79	18082	4.81865	1	1	0.997067
H1fx	3.03599e-08	0.501419	0.787	0.577	0.000707689		GOTERM_BP_DIRECT	GO:0006406~mRNA export from nucleus	3	1.46341	0.059776	ALKBH5, BC005561, SRSF10	190	38	18082	7.5133	1	1	0.997067
Ttc14	3.34633e-08	0.352778	0.667	0.397	0.000780029		GOTERM_BP_DIRECT	GO:0070842~aggresome assembly	2	0.97561	0.0611064	VCP, HDAC6	190	6	18082	31.7228	1	1	0.997067
Akap9	3.37144e-08	0.39642	0.723	0.449	0.000785883		GOTERM_BP_DIRECT	GO:0018401~peptidyl-proline hydroxylation to 4-hydroxy-L-proline	2	0.97561	0.0611064	EGLN1, P4HB	190	6	18082	31.7228	1	1	0.997067
Dnmt3b	3.57479e-08	0.387227	0.745	0.5	0.000833284		GOTERM_BP_DIRECT	GO:0060964~regulation of gene silencing by miRNA	2	0.97561	0.0611064	TNRC6C, TRIM71	190	6	18082	31.7228	1	1	0.997067
Nfe2l1	4.02037e-08	0.389115	0.74	0.5	0.000937149		GOTERM_BP_DIRECT	GO:0061157~mRNA destabilization	2	0.97561	0.0611064	HNRNPR, MEX3D	190	6	18082	31.7228	1	1	0.997067
Ier5l	4.5314e-08	0.300124	0.378	0.147	0.00105627		GOTERM_BP_DIRECT	GO:0000381~regulation of alternative mRNA splicing, via spliceosome	3	1.46341	0.0625859	HNRNPL, RBM25, MALAT1	190	39	18082	7.32065	1	1	0.997067
Ankrd26	4.83814e-08	0.259294	0.38	0.141	0.00112777		GOTERM_BP_DIRECT	GO:0010793~regulation of mRNA export from nucleus	2	0.97561	0.0709233	SUPT6, IWS1	190	7	18082	27.191	1	1	0.997067
Prpf38b	5.39551e-08	0.40236	0.826	0.622	0.00125769		GOTERM_BP_DIRECT	GO:0010870~positive regulation of receptor biosynthetic process	2	0.97561	0.0709233	HDAC1, HDAC6	190	7	18082	27.191	1	1	0.997067
Sin3a	6.05236e-08	0.312061	0.696	0.442	0.00141081		GOTERM_BP_DIRECT	GO:0043161~proteasome-mediated ubiquitin-dependent protein catabolic process	5	2.43902	0.0714691	PPP2CB, VCP, CDC34, PSMD2, PPP2R5C	190	149	18082	3.19357	1	1	0.997067
Ttc3	6.60647e-08	0.371012	0.79	0.564	0.00153997		GOTERM_BP_DIRECT	GO:0006511~ubiquitin-dependent protein catabolic process	5	2.43902	0.0785495	USP7, VCP, TTC3, USP34, HDAC6	190	154	18082	3.08988	1	1	0.997067
Coa7	6.71053e-08	0.347348	0.577	0.333	0.00156422		GOTERM_BP_DIRECT	GO:0006333~chromatin assembly or disassembly	2	0.97561	0.0806382	SMARCA5, BAZ1B	190	8	18082	23.7921	1	1	0.997067
Mcm5	6.96245e-08	0.356763	0.817	0.583	0.00162295		GOTERM_BP_DIRECT	GO:0010216~maintenance of DNA methylation	2	0.97561	0.0806382	USP7, KCNQ1OT1	190	8	18082	23.7921	1	1	0.997067
Kcnq1ot1	7.77893e-08	0.428406	0.633	0.365	0.00181327		GOTERM_BP_DIRECT	GO:0002244~hematopoietic progenitor cell differentiation	4	1.95122	0.083358	TOP2A, ANLN, SIN3A, PRRC2C	190	98	18082	3.88443	1	1	0.997067
Nr6a1	8.54335e-08	0.266942	0.425	0.192	0.00199146		GOTERM_BP_DIRECT	GO:0042127~regulation of cell proliferation	6	2.92683	0.0901642	PURA, CCDC88A, EID2, CFDP1, JUND, JAK1	190	227	18082	2.51546	1	1	0.997067
U2af2	9.63499e-08	0.30929	0.839	0.615	0.00224592		GOTERM_BP_DIRECT	GO:0048024~regulation of mRNA splicing, via spliceosome	2	0.97561	0.0902519	YTHDC1, SRSF10	190	9	18082	21.1485	1	1	0.997067
Srpk1	1.13941e-07	0.368505	0.884	0.686	0.00265597		GOTERM_BP_DIRECT	GO:0048679~regulation of axon regeneration	2	0.97561	0.0997657	MAP2K2, PTPRF	190	10	18082	19.0337	1	1	0.997067
Anln	1.16353e-07	0.280997	0.546	0.301	0.00271218		GOTERM_BP_DIRECT	GO:0006346~methylation-dependent chromatin silencing	2	0.97561	0.0997657	HDAC1, DNMT3B	190	10	18082	19.0337	1	1	0.997067
Sod1	1.28955e-07	0.276003	0.964	0.878	0.00300593
Trim71	1.34517e-07	0.319489	0.678	0.391	0.00313559
Prmt7	1.45275e-07	0.306796	0.774	0.545	0.00338636
Siva1	1.50933e-07	0.280188	0.978	0.91	0.00351824
Kansl1	1.53722e-07	0.28463	0.624	0.359	0.00358326
Ptp4a2	1.56173e-07	0.360238	0.837	0.596	0.00364038
Cpsf1	1.60899e-07	0.280173	0.562	0.327	0.00375056
Mrpl37	1.72796e-07	0.284861	0.651	0.378	0.00402787
Jund	1.81063e-07	0.363214	0.919	0.769	0.00422059
Hyou1	1.81619e-07	0.293804	0.483	0.231	0.00423354
Tex10	2.2105e-07	0.337045	0.794	0.545	0.00515269
Gcat	2.47744e-07	0.335951	0.727	0.526	0.00577491
Nop56	2.57433e-07	0.378587	0.922	0.724	0.00600076
Ankrd12	2.80874e-07	0.404446	0.785	0.59	0.00654718
Rnaseh2c	2.81553e-07	0.371813	0.852	0.647	0.00656299
Metrn	2.99147e-07	0.250345	0.447	0.212	0.00697311
Uap1l1	3.15497e-07	0.266873	0.503	0.263	0.00735424
Cox6a1	3.24537e-07	0.282522	0.973	0.929	0.00756495
Chd6	3.31605e-07	0.32818	0.698	0.417	0.00772972
Xpo1	3.47677e-07	0.360188	0.841	0.603	0.00810435
Ddx50	3.47875e-07	0.36413	0.765	0.506	0.00810897
P4hb	3.67043e-07	0.369277	0.787	0.551	0.00855576
Chpt1	4.06143e-07	0.324746	0.718	0.455	0.0094672
Bc1	4.21833e-07	0.323724	1	0.955	0.00983293
Zc3h13	4.32807e-07	0.378644	0.81	0.545	0.0100887
Etnk1	4.42987e-07	0.260378	0.497	0.269	0.010326
Usp7	4.65837e-07	0.33186	0.87	0.66	0.0108587
Mycbp2	5.94796e-07	0.353718	0.828	0.59	0.0138647
Kmt2a	6.42328e-07	0.328759	0.727	0.481	0.0149727
Bclaf1	6.49409e-07	0.373943	0.897	0.763	0.0151377
Ppp2cb	6.7231e-07	0.253965	0.604	0.346	0.0156715
Lonrf3	7.13721e-07	0.353196	0.841	0.609	0.0166368
Nmt1	7.16089e-07	0.270487	0.615	0.372	0.016692
Maco1	7.24209e-07	0.352396	0.828	0.59	0.0168813
Comt	7.69165e-07	0.273212	0.477	0.244	0.0179292
Shmt1	8.6491e-07	0.332197	0.714	0.487	0.0201611
Chd4	9.79125e-07	0.358376	0.924	0.724	0.0228234
Mcmbp	1.01359e-06	0.295385	0.776	0.571	0.0236267
Wdr18	1.0583e-06	0.326333	0.879	0.667	0.024669
Bub1b	1.14712e-06	0.321208	0.696	0.462	0.0267394
Nrtn	1.18413e-06	0.256807	0.479	0.25	0.0276022
Cplane1	1.23523e-06	0.259369	0.454	0.25	0.0287932
Kif2a	1.31503e-06	0.292117	0.792	0.558	0.0306533
Nup62	1.36233e-06	0.261482	0.617	0.391	0.0317559
Mcm6	1.43766e-06	0.320135	0.89	0.654	0.0335118
Ptprs	1.51629e-06	0.274435	0.568	0.34	0.0353448
Hdac6	1.55176e-06	0.301368	0.814	0.59	0.0361716
Brd3	1.5694e-06	0.355377	0.839	0.667	0.0365826
Unc119b	1.61674e-06	0.288821	0.732	0.506	0.0376861
Tmed9	1.66194e-06	0.340892	0.87	0.615	0.0387397
Smarca5	1.71871e-06	0.260109	0.982	0.962	0.0400631
Slc25a3	1.8354e-06	0.271665	0.971	0.865	0.0427832
Pgm2l1	1.89777e-06	0.306384	0.539	0.321	0.044237
Gadd45b	1.91607e-06	0.281173	0.47	0.269	0.0446635
Malat1	2.0865e-06	0.391717	0.949	0.891	0.0486362
Rapgef6	2.12433e-06	0.276255	0.579	0.378	0.0495181
Gm26917	2.16403e-06	0.321376	0.776	0.506	0.0504434
Eid2	2.17443e-06	0.278922	0.631	0.423	0.0506861
Usp34	2.23563e-06	0.324387	0.928	0.776	0.0521124
Mga	2.23795e-06	0.310006	0.727	0.5	0.0521666
Sf3b3	2.39853e-06	0.27937	0.763	0.564	0.0559096
Smagp	2.40148e-06	0.293599	0.763	0.532	0.0559785
Eif5b	2.43406e-06	0.279797	0.982	0.917	0.056738
4932438A13Rik	2.44691e-06	0.287821	0.617	0.41	0.0570374
Gtf2i	2.65763e-06	0.28724	0.604	0.372	0.0619492
Cep85	2.95674e-06	0.29498	0.796	0.558	0.0689216
Pnn	3.22726e-06	0.282623	0.913	0.75	0.0752274
Ccar1	3.3375e-06	0.338286	0.743	0.5	0.0777971
Tmco1	3.4267e-06	0.276925	0.716	0.487	0.0798764
Fbl	3.45562e-06	0.27383	0.996	0.949	0.0805505
Eif3a	4.01612e-06	0.312676	0.935	0.776	0.0936157
Spen	4.01695e-06	0.276019	0.51	0.282	0.0936351
Sycp3	4.35372e-06	0.329551	0.928	0.808	0.101485
Pdia3	4.791e-06	0.32065	0.913	0.801	0.111678
Mea1	5.07711e-06	0.303565	0.859	0.673	0.118347
Baz1b	5.10332e-06	0.335639	0.848	0.673	0.118958
Txnl4a	6.03218e-06	0.257727	0.89	0.769	0.14061
Vps13a	6.29373e-06	0.270454	0.738	0.494	0.146707
Zmynd19	6.49625e-06	0.285344	0.879	0.692	0.151428
Gls	6.59069e-06	0.26419	0.732	0.513	0.153629
Zswim7	6.94791e-06	0.302412	0.776	0.558	0.161956
Auts2	7.34887e-06	0.336126	0.819	0.583	0.171302
Nsd2	8.48763e-06	0.325033	0.803	0.59	0.197847
Sec61a1	8.64131e-06	0.265474	0.651	0.429	0.201429
Tmed5	9.25368e-06	0.285187	0.508	0.308	0.215703
Otud4	1.06063e-05	0.282046	0.763	0.545	0.247234
Csnk2a2	1.06749e-05	0.269774	0.857	0.635	0.248833
Srrm2	1.11001e-05	0.357229	0.917	0.776	0.258743
Rpn2	1.16722e-05	0.250854	0.651	0.397	0.272079
Cdc34	1.2617e-05	0.303648	0.895	0.737	0.294103
mt-Nd4l	1.32742e-05	0.308537	0.821	0.647	0.309423
Git2	1.43514e-05	0.282526	0.506	0.333	0.334532
Ccdc88a	1.45325e-05	0.330564	0.787	0.577	0.338752
Brwd1	1.52978e-05	0.265524	0.736	0.494	0.356592
Prkar2b	1.55051e-05	0.268069	0.729	0.532	0.361423
Cadm1	1.57044e-05	0.274609	0.734	0.532	0.36607
Cfdp1	1.57356e-05	0.273653	0.931	0.788	0.366796
Supt6	1.69858e-05	0.282721	0.655	0.462	0.395939
Canx	1.75719e-05	0.281896	0.736	0.513	0.409601
Tex14	1.80379e-05	0.271259	0.667	0.436	0.420462
BC005561	1.95287e-05	0.263706	0.595	0.378	0.455213
Cs	1.97039e-05	0.253579	0.767	0.564	0.459297
Psmd2	1.99461e-05	0.255639	0.98	0.91	0.464943
Myo9a	2.01567e-05	0.285514	0.557	0.365	0.469852
Gm45184	2.07735e-05	0.673627	0.233	0.077	0.484229
Hjurp	2.1259e-05	0.278683	0.783	0.571	0.495548
Cenpf	2.34708e-05	0.358609	0.94	0.846	0.547105
Ubn2	2.46999e-05	0.279406	0.638	0.455	0.575754
Ddx10	2.53766e-05	0.323396	0.906	0.744	0.591528
Crebbp	2.61259e-05	0.310018	0.801	0.59	0.608994
Klhl24	2.93093e-05	0.374226	0.57	0.372	0.6832
Hist1h2bj	3.06597e-05	0.272152	0.528	0.333	0.714678
mt-Nd4	3.14919e-05	0.305874	0.96	0.91	0.734076
Map2k2	3.17302e-05	0.258369	0.94	0.846	0.739631
Top2a	3.45236e-05	0.324767	0.879	0.737	0.804746
Gon4l	3.46463e-05	0.272622	0.716	0.506	0.807605
Pura	3.91284e-05	0.255595	0.588	0.397	0.912084
Alkbh5	4.0509e-05	0.270926	0.864	0.654	0.944265
Ranbp2	4.15325e-05	0.293654	0.763	0.538	0.968124
D10Wsu102e	4.17011e-05	0.274645	0.893	0.718	0.972051
Csde1	4.65843e-05	0.272942	0.928	0.769	1
Gnl2	4.73476e-05	0.275706	0.81	0.641	1
Rif1	5.03309e-05	0.26954	0.743	0.513	1
Rbbp6	5.25891e-05	0.267896	0.841	0.686	1
Aplp2	5.99738e-05	0.280848	0.732	0.551	1
Uba1	6.18603e-05	0.259242	0.808	0.596	1
Ccdc85b	6.29369e-05	0.281512	0.83	0.622	1
Cse1l	6.30076e-05	0.268241	0.787	0.577	1
Prrc2c	6.62105e-05	0.257858	0.946	0.891	1
Txlna	6.70113e-05	0.254289	0.752	0.564	1
Ythdc1	6.71062e-05	0.271392	0.875	0.654	1
Rae1	6.77305e-05	0.275278	0.911	0.756	1
Brd1	8.80155e-05	0.270394	0.403	0.237	1
Iws1	0.000126476	0.258276	0.808	0.596	1
Strbp	0.000128562	0.281185	0.888	0.737	1
Sox3	0.000131562	0.260116	0.664	0.468	1
Ppib	0.000134718	0.259199	0.904	0.776	1
Cdk12	0.000139334	0.253982	0.814	0.667	1
Ung	0.000146415	0.25197	0.752	0.564	1
Arhgef40	0.000148197	0.539942	0.477	0.282	1
Hdac1	0.00014905	0.256828	0.828	0.647	1
Hnrnpr	0.000149876	0.263222	0.861	0.679	1
Hist1h2ab	0.000167892	0.273488	0.318	0.167	1
Jak1	0.000241048	0.257563	0.7	0.532	1
Enah	0.000253492	0.409148	0.821	0.641	1
Golgb1	0.000349943	0.253475	0.729	0.519	1
Eif4g1	0.00035999	0.262133	0.852	0.628	1
Stra8	0.00042382	0.306991	0.734	0.577	1
3110009E18Rik	0.000695166	0.2771	0.347	0.224	1
Exoc1	0.0010578	0.685101	0.593	0.449	1
Gm17494	0.00123166	0.327927	0.351	0.212	1
Hsp90b1	0.00180496	0.259099	0.917	0.782	1
Aldh1a3	0.00225369	0.345334	0.293	0.16	1
Mpv17l	0.00884708	0.498671	0.629	0.481	1

## Sheet: Fig6-S2EF-2
DSPG2 up-regulated gene							GO
	p_val	avg_log2FC	pct.1	pct.2	p_val_adj		Category	Term	Count	%	PValue	Genes	List Total	Pop Hits	Pop Total	Fold Enrichment	Bonferroni	Benjamini	FDR
Gm10076	1.04556e-25	-0.709776	0.991	0.994	2.43721e-21		GOTERM_BP_DIRECT	GO:0006412~translation	18	23.3766	2.41118e-13	TSFM, RPS9, RPL3, RPL10, RPL21, RPL11, EIF2S2, RPL10A, EIF1, RPS4X, RPS26, EEF1B2, MRPL30, RPS27, RPS20, UBA52, RPL39, RPS12	73	401	18082	11.1186	7.08953e-11	7.08886e-11	7.06475e-11
Rps12	6.30967e-25	-0.58566	1	1	1.47078e-20		GOTERM_BP_DIRECT	GO:0006880~intracellular sequestering of iron ion	4	5.19481	9.76228e-06	FTL1, FTH1, FTHL17E, FTHL17C	73	11	18082	90.0722	0.00286601	0.00143506	0.00143017
Tpt1	5.87716e-23	-0.464386	1	1	1.36996e-18		GOTERM_BP_DIRECT	GO:0006826~iron ion transport	4	5.19481	0.000115379	FTL1, FTH1, FTHL17E, FTHL17C	73	24	18082	41.2831	0.0333545	0.0113072	0.0112687
Fth1	1.38604e-22	-0.505066	0.998	1	3.23086e-18		GOTERM_BP_DIRECT	GO:0000027~ribosomal large subunit assembly	3	3.8961	0.004777	RPL3, RPL10, RPL11	73	26	18082	28.5806	0.75532	0.35111	0.349915
Rps4x	8.29642e-20	-0.779317	0.834	0.923	1.93389e-15		GOTERM_BP_DIRECT	GO:0006879~cellular iron ion homeostasis	3	3.8961	0.0138606	FTL1, FTH1, FTHL17E	73	45	18082	16.5132	0.983486	0.815004	0.812232
Rps20	7.98969e-16	-0.449972	1	1	1.8624e-11		GOTERM_BP_DIRECT	GO:0006875~cellular metal ion homeostasis	2	2.5974	0.0197535	MT1, MT3	73	5	18082	99.0795	0.997165	0.967924	0.964632
Rpl3	1.82134e-15	-0.419184	1	0.994	4.24554e-11		GOTERM_BP_DIRECT	GO:0019430~removal of superoxide radicals	2	2.5974	0.0467636	PRDX1, MT3	73	12	18082	41.2831	0.999999	1	1
Ftl1	3.62575e-12	-0.482532	0.998	0.994	8.45162e-08		GOTERM_BP_DIRECT	GO:0010038~response to metal ion	2	2.5974	0.0467636	MT1, MT3	73	12	18082	41.2831	0.999999	1	1
Rps9	5.67686e-12	-0.280235	1	1	1.32328e-07		GOTERM_BP_DIRECT	GO:0030150~protein import into mitochondrial matrix	2	2.5974	0.0618669	TIMM17A, TIMM23	73	16	18082	30.9623	1	1	1
Sumo2	3.2145e-11	-0.327417	0.991	0.994	7.49299e-07		GOTERM_BP_DIRECT	GO:0006882~cellular zinc ion homeostasis	2	2.5974	0.0693299	MT1, MT3	73	18	18082	27.5221	1	1	1
EU599041	3.61698e-11	-0.279511	0.065	0.263	8.43117e-07		GOTERM_BP_DIRECT	GO:0006626~protein targeting to mitochondrion	2	2.5974	0.0840806	FIS1, TOMM5	73	22	18082	22.5181	1	1	1
Eef1b2	1.01613e-10	-0.359233	0.98	0.994	2.36859e-06		GOTERM_BP_DIRECT	GO:0050821~protein stabilization	3	3.8961	0.0923122	TBRG1, SUMO1, MT3	73	128	18082	5.80544	1	1	1
Rpl10	1.32058e-10	-0.371697	0.978	0.981	3.07826e-06		GOTERM_BP_DIRECT	GO:0006979~response to oxidative stress	3	3.8961	0.0984628	PRDX1, GCLM, MT3	73	133	18082	5.58719	1	1	1
Rpl10a	2.02239e-10	-0.322598	1	1	4.71418e-06
Prdx1	7.03328e-10	-0.405353	0.998	1	1.63946e-05
Rpl39	9.64334e-10	-0.569821	0.933	0.917	2.24786e-05
Mt1	1.22452e-09	-0.515468	0.993	0.994	2.85436e-05
Zfp936	1.38597e-09	-0.528437	0.358	0.558	3.23071e-05
Naca	1.429e-09	-0.327967	1	1	3.331e-05
Tomm6	3.68565e-09	-0.389357	0.971	0.974	8.59126e-05
Btf3	8.05281e-09	-0.410534	0.949	0.936	0.000187711
Fis1	9.352e-09	-0.4138	0.919	0.929	0.000217995
Pomp	1.85749e-08	-0.397048	0.935	0.917	0.000432982
Rpl21	3.28339e-08	-0.26455	1	1	0.000765359
Rpl11	4.03494e-08	-0.315306	0.993	1	0.000940544
Rps27	9.30189e-08	-0.273125	1	0.994	0.00216827
H2afz	5.42005e-07	-0.342736	0.984	0.962	0.0126341
Eif1	5.43581e-07	-0.280126	1	1	0.0126709
Uba52	8.08602e-07	-0.537017	0.962	0.955	0.0188485
Polr1d	4.86586e-06	-0.349646	0.893	0.897	0.113423
Atp5e	6.58615e-06	-0.28945	0.989	0.994	0.153523
Bola2	1.04799e-05	-0.291903	0.935	0.955	0.244287
Timm23	1.7127e-05	-0.285901	0.953	0.917	0.399231
Txn1	1.76482e-05	-0.337578	0.906	0.891	0.411379
Rps26	2.39428e-05	-0.258009	1	1	0.558106
Arpc3	3.05428e-05	-0.387244	0.904	0.897	0.711954
Tbrg1	5.82823e-05	-0.359254	0.817	0.788	1
Imp3	6.75494e-05	-0.301453	0.743	0.795	1
Dtymk	0.000111233	-0.436799	0.691	0.737	1
Ndufb5	0.000147589	-0.279021	0.861	0.872	1
Fthl17e	0.000184941	-0.367101	0.396	0.519	1
Myl6	0.000327337	-0.286018	0.857	0.801	1
Tmsb10	0.000364506	-0.339749	1	1	1
Fthl17c	0.000404932	-0.383444	0.685	0.679	1
Cops9	0.000519109	-0.407716	0.821	0.821	1
Eid1	0.000676669	-0.367457	0.649	0.679	1
Cisd1	0.000732395	-0.25662	0.872	0.84	1
Gclm	0.000752283	-0.298357	0.899	0.865	1
Erh	0.000789904	-0.275216	0.926	0.885	1
Sumo1	0.000933817	-0.25853	0.85	0.846	1
Eif2s2	0.000958434	-0.273713	0.996	0.968	1
Mrpl30	0.00121664	-0.31289	0.904	0.833	1
Afp	0.00146094	-0.489265	0.519	0.59	1
Rnf113a2	0.00161633	-0.253351	0.235	0.346	1
Rhox13	0.00191931	-0.267278	0.662	0.673	1
Lsm5	0.0020535	-0.284066	0.89	0.859	1
1700048O20Rik	0.00205481	-0.313535	0.481	0.551	1
Mt3	0.002159	-0.346235	0.365	0.455	1
Timm17a	0.00247226	-0.27684	0.747	0.737	1
Llph	0.00269968	-0.260674	0.897	0.846	1
Ciao2a	0.00284858	-0.412216	0.438	0.526	1
Tuba1b	0.00286288	-0.288061	0.705	0.705	1
Dpm1	0.00322675	-0.264103	0.81	0.769	1
Hist1h2ap	0.00329162	-0.680876	0.801	0.795	1
Gtf2a2	0.00331382	-0.326097	0.62	0.654	1
Cox18	0.00386256	-0.288322	0.367	0.455	1
8030474K03Rik	0.00390093	-0.291891	0.47	0.538	1
Actr10	0.00465961	-0.279923	0.685	0.673	1
Rbm17	0.00504272	-0.260629	0.776	0.769	1
Dcun1d5	0.00547554	-0.265289	0.886	0.795	1
Acp1	0.00564278	-0.250457	0.787	0.782	1
Tsfm	0.00594277	-0.275356	0.412	0.5	1
Plekhj1	0.00650063	-0.266732	0.792	0.744	1
Cox7b2	0.00676171	-0.269728	0.689	0.673	1
Tomm5	0.0071036	-0.323296	0.306	0.391	1
Trappc4	0.00715955	-0.269983	0.785	0.75	1
Fam204a	0.00745335	-0.317987	0.709	0.712	1
Med10	0.00910769	-0.272483	0.828	0.795	1
Stoml2	0.00996276	-0.252225	0.74	0.731	1
