# Supplementary material for: SRSF10 is essential for progenitor spermatogonia expansion by regulating alternative splicing
Source: eLife journal article supplement (doi:10.7554/elife.78211), 2022-10-24
Supplement: fig6-figsupp3-data1 [file Figure 6-figure supplement 3-source data 1.xlsx]

## Sheet: Fig6-S3
Figure6-figure supplement 3-source data
		EdU+GFRa1+	GFRa1+	EdU+GFRa1+/GFRa1+				EdU+GFRa1+	GFRa1+	EdU+GFRa1+/GFRa1+				EdU+GFRa1+/GFRa1+(%)
Control-1	1	10	28			Srsf10CKO-1	1	11	31					Control	Srsf10CKO
	2	11	30				2	14	52					28.727	27.729
	3	12	36				3	23	60					26.538	22.427
	4	25	71				4	19	44					26.303	27.221
	5	9	44				5	24	96				mean	27.1893	25.7923
	6	9	39				6	13	54
	7	18	51				7	19	92				T-test	0.510071
	8	10	33				8	11	41
	9	7	31				9	7	36
	10	8	30				10	12	44
	11	15	71				11	8	50
	12	19	62				12	13	49
	13	5	24				13	14	29
		158	550	0.287273	28.727			188	678	0.277286	27.729
Control-2	1	11	37			Srsf10CKO-2	1	3	31
	2	10	35				2	8	34
	3	8	35				3	11	26
	4	11	58				4	10	37
	5	22	80				5	3	18
	6	20	61				6	7	43
	7	5	27				7	4	12
	8	17	61				8	7	47
	9	15	64				9	12	43
	10	19	62				10	15	59
	11						11	5	29
	12						12
	13						13
		138	520	0.265385	26.538			85	379	0.224274	22.427
Control-3	1	14	40			Srsf10CKO-3	1	6	21
	2	6	27				2	5	19
	3	6	25				3	10	37
	4	8	43				4	3	15
	5	9	38				5	6	20
	6	3	30				6	9	18
	7	5	34				7	4	21
	8	9	27				8	6	28
	9	15	45				9	7	39
	10	2	23				10	8	33
	11	21	54				11	9	21
	12	13	36				12	8	30
	13						13	14	47
		111	422	0.263033	26.303			95	349	0.272206	27.221
