# Supplementary material for: SRSF10 is essential for progenitor spermatogonia expansion by regulating alternative splicing
Source: eLife journal article supplement (doi:10.7554/elife.78211), 2022-10-24
Supplement: fig7-figsupp1-data1 [file Figure 7-figure supplement 1-source data 1.xlsx]

## Sheet: Figure S6C
Figure 7-figure supplement 1-source data 1:Relative mRNA expression of Srsf10 in enriched cells.
	Relative mRNA expression of Srsf10					The detailed information of Figure S6C
	Control	Srsf10cKO					THY1+ cells		Gene Ct		Actin Ct				ΔΔCt	2^-ΔΔCt	mean
	1.00291	0.0979927				Actin	Control-1	Rep-1	19.74	19.78
	1.04371	0.111884						Rep-2	19.82
	1.00001	0.174564					Srsf10cKO-1	Rep-1	19.54
	1.00002	0.102607						Rep-2	19.57
mean	1.01166	0.121762				Srsf10	Control-1	Rep-1	24.78	24.71	19.74	19.78	5.04	4.93	0.11	0.926588	1.00291
T-test	1.64523e-07							Rep-2	24.64		19.82		4.82	0	-0.11	1.07923
							Srsf10cKO-1	Rep-1	27.72		19.54		8.18	0	3.25	0.105112	0.0979927
								Rep-2	27.96		19.57		8.39	0	3.46	0.0908733
						Actin	Control-2	Rep-1	18.47	18.49			18.47	18.49		1
								Rep-2	18.51				18.51	0		1
							Srsf10cKO-2	Rep-1	19.07				19.07	0		1
								Rep-2	19.06				19.06	0		1
						Srsf10	Control-2	Rep-1	23.57	23.165	18.47	18.49	5.1	4.675	0.425	0.744839	1.04371
								Rep-2	22.76		18.51		4.25	0	-0.425	1.34257
							Srsf10cKO-2	Rep-1	26.92		19.07		7.85	0	3.175	0.110721	0.111884
								Rep-2	26.88		19.06		7.82	0	3.145	0.113047
						Actin	Control-3	Rep-1	19.68	19.675			19.68	19.675		1
								Rep-2	19.67				19.67	0		1
							Srsf10cKO-3	Rep-1	18.11				18.11	0		1
								Rep-2	18.1				18.1	0		1
						Srsf10	Control-3	Rep-1	25.51	25.51	19.68	19.675	5.83	5.835	-0.005	1.00347	1.00001
								Rep-2	25.51		19.67		5.84	0	0.005	0.99654
							Srsf10cKO-3	Rep-1	26.66		18.11		8.55	0	2.715	0.152301	0.174564
								Rep-2	26.28		18.1		8.18	0	2.345	0.196827
						Actin	Control-4	Rep-1	17.64	17.695			17.64	17.695		1
								Rep-2	17.75				17.75	0		1
							Srsf10cKO-4	Rep-1	17.84				17.84	0		1
								Rep-2	17.98				17.98	0		1
						Srsf10	Control-4	Rep-1	22.86	22.925	17.64	17.695	5.22	5.23	-0.01	1.00696	1.00002
								Rep-2	22.99		17.75		5.24	0	0.01	0.993092
							Srsf10cKO-4	Rep-1	26.71		17.84		8.87	0	3.64	0.0802141	0.102607
								Rep-2	26.21		17.98		8.23	0	3	0.125
