# Supplementary material for: SRSF10 is essential for progenitor spermatogonia expansion by regulating alternative splicing
Source: eLife journal article supplement (doi:10.7554/elife.78211), 2022-10-24
Supplement: fig8-data2 [file Figure 8-source data 2.xlsx]

## Sheet: 113 genes GO
Category	Term	Count	%	PValue	Genes	List Total	Pop Hits	Pop Total	Fold Enrichment	Bonferroni	Benjamini	FDR
GOTERM_BP_DIRECT	GO:0000398~mRNA splicing, via spliceosome	8	7.20721	2.73034e-05	SPEN, LSM7, RBM19, HNRNPC, ZCRB1, PAXBP1, SRSF10, RBM5	101	175	20094	9.09488	0.0156039	0.0157267	0.0156721
GOTERM_BP_DIRECT	GO:0008380~RNA splicing	9	8.10811	6.97278e-05	RBM39, LSM7, PPP4R2, SCAF11, HNRNPC, ZCRB1, SRSF10, RBM5, SRPK1	101	275	20094	6.51111	0.0393687	0.0200816	0.0200119
GOTERM_BP_DIRECT	GO:0034502~protein localization to chromosome	3	2.7027	0.000506613	SCML2, STAG3, TEX15	101	7	20094	85.2645	0.253144	0.0972696	0.0969319
GOTERM_BP_DIRECT	GO:0017148~negative regulation of translation	5	4.5045	0.00110788	FXR1, ILF3, EIF4E2, PAIP2, GIGYF2	101	91	20094	10.9313	0.471913	0.159535	0.158981
GOTERM_BP_DIRECT	GO:0006397~mRNA processing	8	7.20721	0.0020522	RBM39, LSM7, PPP4R2, HNRNPC, ZCRB1, SRSF10, RBM5, SRPK1	101	357	20094	4.45827	0.693728	0.236413	0.235592
GOTERM_BP_DIRECT	GO:0000245~spliceosomal complex assembly	3	2.7027	0.00317615	SCAF11, RBM5, SRPK1	101	17	20094	35.1089	0.839967	0.30491	0.303852
GOTERM_BP_DIRECT	GO:0006325~chromatin organization	7	6.30631	0.00614412	KDM3B, KAT6A, UBN1, EHMT1, BRD8, SUDS3, BAZ1B	101	330	20094	4.22016	0.971273	0.436944	0.435426
GOTERM_BP_DIRECT	GO:0006417~regulation of translation	5	4.5045	0.00626551	FXR1, TCOF1, EIF4E2, PAIP2, EIF4G1	101	147	20094	6.76702	0.973225	0.436944	0.435426
GOTERM_BP_DIRECT	GO:0007130~synaptonemal complex assembly	3	2.7027	0.00682724	SYCP1, TEX11, TEX15	101	25	20094	23.8741	0.980668	0.436944	0.435426
GOTERM_BP_DIRECT	GO:2000779~regulation of double-strand break repair	3	2.7027	0.00851943	PPP4R2, UBR5, BRD8	101	28	20094	21.3161	0.992761	0.490719	0.489015
GOTERM_BP_DIRECT	GO:0007059~chromosome segregation	4	3.6036	0.0129318	CENPH, STAG3, INCENP, SRPK1	101	98	20094	8.12043	0.999445	0.677154	0.674802
GOTERM_BP_DIRECT	GO:0006334~nucleosome assembly	4	3.6036	0.0163452	NASP, KAT6A, HP1BP3, SSRP1	101	107	20094	7.4374	0.999925	0.74941	0.746808
GOTERM_BP_DIRECT	GO:0007129~synapsis	3	2.7027	0.0169138	STAG3, SYCP1, TEX15	101	40	20094	14.9213	0.999946	0.74941	0.746808
GOTERM_BP_DIRECT	GO:0032880~regulation of protein localization	4	3.6036	0.0184394	SYCP1, MYCBP2, TEX15, EPS15	101	112	20094	7.10537	0.999978	0.758651	0.756016
GOTERM_BP_DIRECT	GO:0007052~mitotic spindle organization	3	2.7027	0.0220155	CENPH, INCENP, TACC3	101	46	20094	12.975	0.999997	0.845396	0.842461
GOTERM_BP_DIRECT	GO:0010324~membrane invagination	2	1.8018	0.0294942	CHMP2A, FNBP1L	101	6	20094	66.3168	1	1	0.998261
GOTERM_BP_DIRECT	GO:1905618~positive regulation of miRNA mediated inhibition of translation	2	1.8018	0.0343255	EIF4E2, EIF4G1	101	7	20094	56.843	1	1	0.998261
GOTERM_BP_DIRECT	GO:0051026~chiasma assembly	2	1.8018	0.039133	SYCP1, TEX11	101	8	20094	49.7376	1	1	0.998261
GOTERM_BP_DIRECT	GO:0000375~RNA splicing, via transesterification reactions	2	1.8018	0.039133	SCAF11, SRSF10	101	8	20094	49.7376	1	1	0.998261
GOTERM_BP_DIRECT	GO:0006413~translational initiation	3	2.7027	0.0416407	EIF5, EIF4E2, EIF4G1	101	65	20094	9.18233	1	1	0.998261
GOTERM_BP_DIRECT	GO:0006974~cellular response to DNA damage stimulus	7	6.30631	0.0416768	RIF1, UBR5, HUWE1, MCM10, SSRP1, TEX15, BAZ1B	101	509	20094	2.73606	1	1	0.998261
GOTERM_BP_DIRECT	GO:0006511~ubiquitin-dependent protein catabolic process	5	4.5045	0.0459639	CNOT4, USP48, PSMA4, TTC3, RNF6	101	270	20094	3.68427	1	1	0.998261
GOTERM_BP_DIRECT	GO:0070936~protein K48-linked ubiquitination	3	2.7027	0.0463728	TTC3, UBR5, RNF6	101	69	20094	8.65002	1	1	0.998261
GOTERM_BP_DIRECT	GO:0060765~regulation of androgen receptor signaling pathway	2	1.8018	0.0486769	SAFB2, RNF6	101	10	20094	39.7901	1	1	0.998261
GOTERM_BP_DIRECT	GO:0016567~protein ubiquitination	6	5.40541	0.0626143	CNOT4, TTC3, UBR5, MYCBP2, HUWE1, RNF6	101	428	20094	2.78903	1	1	0.998261
GOTERM_BP_DIRECT	GO:0031571~mitotic G1 DNA damage checkpoint	2	1.8018	0.0628171	DGKZ, GIGYF2	101	13	20094	30.6078	1	1	0.998261
GOTERM_BP_DIRECT	GO:0043484~regulation of RNA splicing	3	2.7027	0.0629985	CLK1, CCNL1, SRSF10	101	82	20094	7.27868	1	1	0.998261
GOTERM_BP_DIRECT	GO:0006412~translation	5	4.5045	0.0711039	EIF5, EEF1D, EIF4E2, PAIP2, EIF4G1	101	313	20094	3.17812	1	1	0.998261
GOTERM_BP_DIRECT	GO:0032886~regulation of microtubule-based process	2	1.8018	0.0721282	MACF1, TACC3	101	15	20094	26.5267	1	1	0.998261
GOTERM_BP_DIRECT	GO:2001022~positive regulation of response to DNA damage stimulus	2	1.8018	0.0721282	FXR1, BCLAF1	101	15	20094	26.5267	1	1	0.998261
GOTERM_BP_DIRECT	GO:0016572~histone phosphorylation	2	1.8018	0.0767493	INCENP, BAZ1B	101	16	20094	24.8688	1	1	0.998261
GOTERM_BP_DIRECT	GO:0050684~regulation of mRNA processing	2	1.8018	0.0813476	SAFB2, SRPK1	101	17	20094	23.4059	1	1	0.998261
GOTERM_BP_DIRECT	GO:0010569~regulation of double-strand break repair via homologous recombination	2	1.8018	0.0859232	PPP4R2, TEX15	101	18	20094	22.1056	1	1	0.998261
GOTERM_BP_DIRECT	GO:0048024~regulation of mRNA splicing, via spliceosome	2	1.8018	0.0859232	RBM39, SRSF10	101	18	20094	22.1056	1	1	0.998261
GOTERM_BP_DIRECT	GO:0006355~regulation of transcription, DNA-templated	11	9.90991	0.0878434	KAT6A, HP1BP3, MIER1, SAFB2, LRRFIP2, RNF6, GPBP1L1, LRRFIP1, ERC1, CCNL1, SRSF10	101	1237	20094	1.76916	1	1	0.998261
GOTERM_BP_DIRECT	GO:0051321~meiotic cell cycle	4	3.6036	0.0911927	STAG3, SYCP1, TEX11, TEX15	101	214	20094	3.7187	1	1	0.998261
GOTERM_BP_DIRECT	GO:0006376~mRNA splice site selection	2	1.8018	0.0950069	SRSF10, LUC7L2	101	20	20094	19.895	1	1	0.998261
GOTERM_BP_DIRECT	GO:0048193~Golgi vesicle transport	2	1.8018	0.0950069	GOLGA4, GOLGA5	101	20	20094	19.895	1	1	0.998261
GOTERM_BP_DIRECT	GO:0051642~centrosome localization	2	1.8018	0.0995152	CCDC141, SYNE2	101	21	20094	18.9477	1	1	0.998261
