# Supplementary material for: SRSF10 is essential for progenitor spermatogonia expansion by regulating alternative splicing
Source: eLife journal article supplement (doi:10.7554/elife.78211), 2022-10-24
Supplement: fig8-figsupp3-data2 [file Figure 8-figure supplement 3-source data 2.xlsx]

## Sheet: Sheet1
Relative expression of Kit in control and srsf10cKO spermatogonia.
	Control			Srsf10cKO
Kit-FL	1.00002	1.00022	1.00049	0.29955	0.335133	0.387926
Kit-Short	1	1.00022		0.676284	0.776461
Kit-All	1.0001	1.00002	1.00174	0.587765	0.737577	0.678795
