# Supplementary material for: SRSF10 is essential for progenitor spermatogonia expansion by regulating alternative splicing
Source: eLife journal article supplement (doi:10.7554/elife.78211), 2022-10-24
Supplement: table1-data1 [file Table 1-source data.xlsx]

## Sheet: Sheet1
Table 1-source data 1: The fertility of Srsf10-cKO male mice.
	No. of male mice	No. of plugged ICR female mice	No. of litters	No. of pups per litter
Control	8	17	14
				13
				16
				17
				12
				18
				17
				6
				9
				14
				18
				15
				12
				8
				13
				13.4286
Srsf10-cKO	8	16	0	0
